# Supplementary material
Source: publisher figshare collection journal article supplement (https://gsajournals.figshare.com/articles/dataset/_/7609925)
Supplement: Supplementary file 1 [file 2]

## Sheet: GO Slim Data
File S1. Gene Ontology (GO) categories associated with RC line SNPs
GO Slim catagories determined with CateGOrizer (animalgenome.org)
Bold = significantly enriched according to GoMiner (Fisher's Exact Test, p < 0.05)
Molecular Function
Go Term	Defenition	# SNPs	SNPs	GO Counts	Fractions
GO:0005488	binding	19	CED-12, PPFR-1, SYD-2, FER-1, Y41E3.7, TTN-1, TIR-1, SLT-1, MATH-33, TAG-80, Y34B4A.2, F10F2.2, Y106G6D.4, MRP-7, PPH-4.1, Y82E9BR.2, C52E12.1, FKH-9, F16A11.1	22	0.2857
GO:0005515	protein binding	10	TIR-1, CED-12, PPFR-1, SLT-1, MATH-33, SYD-2, TTN-1, TAG-80, PPH-4.1, Y34B4A.2	14	0.1818
GO:0003824	catalytic activity	16	F10F2.2, ATIC-1, PPH-4.1, Y82E9BR.2, C17H12.3, Y54F10BM.3, AC3.12, MATH-33, MRP-7, ABHD-11.2, K07C5.2, TTN-1, Y106G6D.4, SET-29, OAC-43, Y16B4A.2	12	0.1558
GO:0016787	hydrolase activity	8	Y54F10BM.3, ATIC-1, MATH-33, PPH-4.1, C17H12.3, ABHD-11.2, Y16B4A.2, MRP-7	7	0.0909
GO:0008289	lipid binding	2	CED-12, FER-1	4	0.0519
GO:0005198	structural molecule activity	2	SYD-2, TTN-1	4	0.0519
GO:0008092	cytoskeletal protein binding	1	TTN-1	3	0.039
GO:0016740	transferase activity	6	AC3.12, ATIC-1, SET-29, OAC-43, TTN-1, Y106G6D.4	3	0.039
GO:0004721	phosphoprotein phosphatase activity	3	Y54F10BM.3, PPH-4.1, C17H12.3	2	0.026
GO:0008233	peptidase activity	2	MATH-33, Y16B4A.2	1	0.013
GO:0016301	kinase activity	2	MATH-33, Y16B4A.2	1	0.013
GO:0004872	receptor activity	2	AC3.12, LGC-29	1	0.013
GO:0005102	receptor binding	1	SLT-1	1	0.013
GO:0004672	protein kinase activity	3	AC3.12, Y106G6D.4, TTN-1	1	0.013
GO:0004871	signal transducer activity	1	AC3.12	1	0.013
Cellular Component
Go Term	Defenition	# SNPs	SNPs	Counts	Fractions
GO:0005623	cell	14	SYD-2, FER-1, CED-12, TTN-1, TIR-1, Y82E9BR.2, MATH-33, PPFR-1, PPH-4.1, F10F2.2, SET-29, Y34B4A.2, FKH-9, TWK-17	17	0.4359
GO:0005622	intracellular	12	TTN-1, CED-12, Y82E9BR.2, TIR-1, PPFR-1, SYD-2, MATH-33, PPH-4.1, F10F2.2, SET-29, Y34B4A.2, FKH-9	9	0.2308
GO:0005737	cytoplasm	9	TTN-1, TIR-1, PPFR-1, SYD-2, MATH-33, PPH-4.1, F10F2.2, Y34B4A.2, CED-12	4	0.1026
GO:0005856	cytoskeleton	2	TTN-1, PPH-4.1	3	0.0769
GO:0005634	nucleus	4	Y82E9BR.2, MATH-33, SET-29, FKH-9	3	0.0769
GO:0005886	plasma membrane	3	FER-1, TWK-17, CED-12	3	0.0769
Biological Process
Go Term	Defenition	# SNPs	SNPs	Counts	Fractions
GO:0016043	cell organization and biogenesis	10	TTN-1, SYD-2, SLT-1, TIR-1, FER-1, PPFR-1, MATH-33, CED-12, Y34B4A.2, PPH-4.1	36	0.1698
GO:0006810	transport	9	SYD-2, Y82E9BR.2, CED-12, Y34B4A.2, TWK-17, Y41E3.7, TIR-1, MRP-7, LGC-29	23	0.1085
GO:0008152	metabolism	19	F10F2.2, Y54F10BM.3, PPFR-1, Y106G6D.4, MATH-33, PPH-4.1, SET-29, TTN-1, TIR-1, C17H12.3, Y82E9BR.2, ATIC-1, Y16B4A.2, ABHD-11.2, MRP-7, K07C5.2, OAC-43, Y34B4A.2, FKH-9	23	0.1085
GO:0006996	organelle organization and biogenesis	5	TTN-1, PPFR-1, CED-12, Y34B4A.2, PPH-4.1	15	0.0708
GO:0030154	cell differentiation	5	TTN-1, SLT-1, TIR-1, FER-1, FKH-9	12	0.0566
GO:0007010	cytoskeleton organization and biogenesis	4	TTN-1, PPFR-1, CED-12, PPH-4.1	12	0.0566
GO:0007275	development	11	SLT-1, PPFR-1, PPH-4.1, TTN-1, TIR-1, NLP-20, FER-1, T19D12.1, MATH-33, CED-12, F26F2.7	10	0.0472
GO:0007049	cell cycle	2	PPFR-1, PPH-4.1	10	0.0472
GO:0019538	protein metabolism	10	TTN-1, TIR-1, C17H12.3, Y54F10BM.3, PPFR-1, Y106G6D.4, MATH-33, Y16B4A.2, PPH-4.1, SET-29	9	0.0425
GO:0009653	morphogenesis	5	TTN-1, SLT-1, TIR-1, CED-12, FKH-9	8	0.0377
GO:0009058	biosynthesis	4	TIR-1, F10F2.2, ATIC-1, FKH-9	7	0.033
GO:0009605	response to external stimulus	2	TIR-1, SLT-1	7	0.033
GO:0006139	nucleobase, nucleoside, nucleotide and nucleic acid metabolism	5	TIR-1, F10F2.2, ATIC-1, Y82E9BR.2, FKH-9	7	0.033
GO:0006464	protein modification	9	TTN-1, TIR-1, C17H12.3, Y54F10BM.3, PPFR-1, Y106G6D.4, MATH-33, PPH-4.1, SET-29	7	0.033
GO:0000003	reproduction	7	PPFR-1, SYD-2, TIR-1, FER-1, CED-12, ATIC-1, PPH-4.1	6	0.0283
GO:0007154	cell communication	5	SYD-2, TIR-1, AC3.12, SLT-1, NLP-20	5	0.0236
GO:0040007	growth	3	SLT-1, TIR-1, MATH-33	5	0.0236
GO:0016049	cell growth	1	SLT-1	4	0.0189
GO:0007165	signal transduction	4	SLT-1, TIR-1, AC3.12, NLP-20	3	0.0142
GO:0006950	response to stress	1	TIR-1	1	0.0047
GO:0009607	response to biotic stimulus	1	TIR-1	1	0.0047
GO:0007267	cell-cell signaling	2	TIR-1, SYD-2	1	0.0047

## Sheet: Biological Process gas-1 RC
GO ID	Total	Under	Over	Change	P-Value (Under)	P-Value (Over)	P-Value (Changed)	FDR (Under)	FDR (Over)	FDR (Changed)	Term
51270	84	0	0	3	1	1	0.0015	0	0	1.086	regulation of cellular component movement
6470	196	0	0	4	1	1	0.0019	0	0	0.6615	protein dephosphorylation
6796	1128	0	0	9	1	1	0.0025	0	0	0.5703	phosphate-containing compound metabolic process
60097	1	0	0	1	1	1	0.0027	0	0	0.9628	cytoskeletal rearrangement involved in phagocytosis, engulfment
51597	1	0	0	1	1	1	0.0027	0	0	0.9628	response to methylmercury
6793	1148	0	0	9	1	1	0.0029	0	0	0.8225	phosphorus metabolic process
36211	1229	0	0	9	1	1	0.0045	0	0	0.7281	protein modification process
6464	1229	0	0	9	1	1	0.0045	0	0	0.7281	cellular protein modification process
16311	256	0	0	4	1	1	0.005	0	0	0.6731	dephosphorylation
61024	259	0	0	4	1	1	0.0052	0	0	0.6194	membrane organization
1903744	2	0	0	1	1	1	0.0055	0	0	0.6898	positive regulation of anterograde synaptic vesicle transport
1902120	2	0	0	1	1	1	0.0055	0	0	0.6898	negative regulation of meiotic spindle elongation
1902119	2	0	0	1	1	1	0.0055	0	0	0.6898	regulation of meiotic spindle elongation
1901610	2	0	0	1	1	1	0.0055	0	0	0.6898	positive regulation of vesicle transport along microtubule
18026	2	0	0	1	1	1	0.0055	0	0	0.6898	peptidyl-lysine monomethylation
43412	1307	0	0	9	1	1	0.0068	0	0	0.6904	macromolecule modification
60627	46	0	0	2	1	1	0.007	0	0	0.6574	regulation of vesicle-mediated transport
1903742	3	0	0	1	1	1	0.0082	0	0	0.7181	regulation of anterograde synaptic vesicle transport
1902513	3	0	0	1	1	1	0.0082	0	0	0.7181	regulation of organelle transport along microtubule
1901608	3	0	0	1	1	1	0.0082	0	0	0.7181	regulation of vesicle transport along microtubule
51232	3	0	0	1	1	1	0.0082	0	0	0.7181	meiotic spindle elongation
44802	153	0	0	3	1	1	0.0083	0	0	0.6905	single-organism membrane organization
32879	300	0	0	4	1	1	0.0087	0	0	0.6704	regulation of localization
7015	52	0	0	2	1	1	0.0089	0	0	0.6465	actin filament organization
71822	479	0	0	5	1	1	0.0092	0	0	0.6246	protein complex subunit organization
61025	54	0	0	2	1	1	0.0095	0	0	0.6118	membrane fusion
71684	56	0	0	2	1	1	0.0102	0	0	0.5589	organism emergence from protective structure
35188	56	0	0	2	1	1	0.0102	0	0	0.5589	hatching
32886	56	0	0	2	1	1	0.0102	0	0	0.5589	regulation of microtubule-based process
6928	495	0	0	5	1	1	0.0105	0	0	0.5421	movement of cell or subcellular component
1902805	4	0	0	1	1	1	0.0109	0	0	0.5263	positive regulation of synaptic vesicle transport
99517	4	0	0	1	1	1	0.0109	0	0	0.5263	synaptic vesicle transport along microtubule
99514	4	0	0	1	1	1	0.0109	0	0	0.5263	synaptic vesicle cytoskeletal transport
60632	4	0	0	1	1	1	0.0109	0	0	0.5263	regulation of microtubule-based movement
48490	4	0	0	1	1	1	0.0109	0	0	0.5263	anterograde synaptic vesicle transport
35493	4	0	0	1	1	1	0.0109	0	0	0.5263	SNARE complex assembly
35385	4	0	0	1	1	1	0.0109	0	0	0.5263	Roundabout signaling pathway
18023	4	0	0	1	1	1	0.0109	0	0	0.5263	peptidyl-lysine trimethylation
1902668	5	0	0	1	1	1	0.0137	0	0	0.5024	negative regulation of axon guidance
1902097	5	0	0	1	1	1	0.0137	0	0	0.5024	positive regulation of transcription from RNA polymerase II promoter involved in defense response to Gram-negative bacterium
90224	5	0	0	1	1	1	0.0137	0	0	0.5024	regulation of spindle organization
50922	5	0	0	1	1	1	0.0137	0	0	0.5024	negative regulation of chemotaxis
48843	5	0	0	1	1	1	0.0137	0	0	0.5024	negative regulation of axon extension involved in axon guidance
45168	5	0	0	1	1	1	0.0137	0	0	0.5024	cell-cell signaling involved in cell fate commitment
43113	5	0	0	1	1	1	0.0137	0	0	0.5024	receptor clustering
32887	5	0	0	1	1	1	0.0137	0	0	0.5024	regulation of spindle elongation
31268	5	0	0	1	1	1	0.0137	0	0	0.5024	pseudopodium organization
8089	5	0	0	1	1	1	0.0137	0	0	0.5024	anterograde axonal transport
6189	5	0	0	1	1	1	0.0137	0	0	0.5024	'de novo' IMP biosynthetic process
71840	2036	0	0	11	1	1	0.0158	0	0	0.5121	cellular component organization or biogenesis
1903651	6	0	0	1	1	1	0.0164	0	0	0.5413	positive regulation of cytoplasmic transport
1902803	6	0	0	1	1	1	0.0164	0	0	0.5413	regulation of synaptic vesicle transport
45835	6	0	0	1	1	1	0.0164	0	0	0.5413	negative regulation of meiotic nuclear division
30317	6	0	0	1	1	1	0.0164	0	0	0.5413	sperm motility
51129	76	0	0	2	1	1	0.0183	0	0	0.5504	negative regulation of cellular component organization
51447	7	0	0	1	1	1	0.0191	0	0	0.566	negative regulation of meiotic cell cycle
47496	7	0	0	1	1	1	0.0191	0	0	0.566	vesicle transport along microtubule
31532	7	0	0	1	1	1	0.0191	0	0	0.566	actin cytoskeleton reorganization
6188	7	0	0	1	1	1	0.0191	0	0	0.566	IMP biosynthetic process
44267	1812	0	0	10	1	1	0.0193	0	0	0.5593	cellular protein metabolic process
99518	8	0	0	1	1	1	0.0218	0	0	0.5881	vesicle cytoskeletal trafficking
46040	8	0	0	1	1	1	0.0218	0	0	0.5881	IMP metabolic process
30517	8	0	0	1	1	1	0.0218	0	0	0.5881	negative regulation of axon extension
51668	9	0	0	1	1	1	0.0244	0	0	0.5889	localization within membrane
50771	9	0	0	1	1	1	0.0244	0	0	0.5889	negative regulation of axonogenesis
43406	9	0	0	1	1	1	0.0244	0	0	0.5889	positive regulation of MAP kinase activity
32388	9	0	0	1	1	1	0.0244	0	0	0.5889	positive regulation of intracellular transport
10771	9	0	0	1	1	1	0.0244	0	0	0.5889	negative regulation of cell morphogenesis involved in differentiation
187	9	0	0	1	1	1	0.0244	0	0	0.5889	activation of MAPK activity
6164	91	0	0	2	1	1	0.0257	0	0	0.5891	purine nucleotide biosynthetic process
7051	93	0	0	2	1	1	0.0267	0	0	0.5875	spindle organization
48841	10	0	0	1	1	1	0.0271	0	0	0.605	regulation of axon extension involved in axon guidance
8088	10	0	0	1	1	1	0.0271	0	0	0.605	axo-dendritic transport
23056	95	0	0	2	1	1	0.0278	0	0	0.6016	positive regulation of signaling
16043	1930	0	0	10	1	1	0.029	0	0	0.5985	cellular component organization
7010	433	0	0	4	1	1	0.0296	0	0	0.5946	cytoskeleton organization
72384	11	0	0	1	1	1	0.0298	0	0	0.5988	organelle transport along microtubule
51985	11	0	0	1	1	1	0.0298	0	0	0.5988	negative regulation of chromosome segregation
45214	11	0	0	1	1	1	0.0298	0	0	0.5988	sarcomere organization
212	11	0	0	1	1	1	0.0298	0	0	0.5988	meiotic spindle organization
72522	100	0	0	2	1	1	0.0306	0	0	0.5981	purine-containing compound biosynthetic process
51271	12	0	0	1	1	1	0.0325	0	0	0.6043	negative regulation of cellular component movement
32102	12	0	0	1	1	1	0.0325	0	0	0.6043	negative regulation of response to external stimulus
30308	12	0	0	1	1	1	0.0325	0	0	0.6043	negative regulation of cell growth
10508	12	0	0	1	1	1	0.0325	0	0	0.6043	positive regulation of autophagy
10647	105	0	0	2	1	1	0.0334	0	0	0.6034	positive regulation of cell communication
7017	261	0	0	3	1	1	0.0341	0	0	0.5998	microtubule-based process
1902667	13	0	0	1	1	1	0.0351	0	0	0.5798	regulation of axon guidance
71427	13	0	0	1	1	1	0.0351	0	0	0.5798	mRNA-containing ribonucleoprotein complex export from nucleus
51784	13	0	0	1	1	1	0.0351	0	0	0.5798	negative regulation of nuclear division
51272	13	0	0	1	1	1	0.0351	0	0	0.5798	positive regulation of cellular component movement
50768	13	0	0	1	1	1	0.0351	0	0	0.5798	negative regulation of neurogenesis
45665	13	0	0	1	1	1	0.0351	0	0	0.5798	negative regulation of neuron differentiation
10977	13	0	0	1	1	1	0.0351	0	0	0.5798	negative regulation of neuron projection development
6406	13	0	0	1	1	1	0.0351	0	0	0.5798	mRNA export from nucleus
35335	111	0	0	2	1	1	0.037	0	0	0.5824	peptidyl-tyrosine dephosphorylation
31581	15	0	0	1	1	1	0.0404	0	0	0.6125	hemidesmosome assembly
31345	15	0	0	1	1	1	0.0404	0	0	0.6125	negative regulation of cell projection organization
7044	15	0	0	1	1	1	0.0404	0	0	0.6125	cell-substrate junction assembly
1903649	16	0	0	1	1	1	0.0431	0	0	0.6173	regulation of cytoplasmic transport
51231	16	0	0	1	1	1	0.0431	0	0	0.6173	spindle elongation
6541	16	0	0	1	1	1	0.0431	0	0	0.6173	glutamine metabolic process
48640	17	0	0	1	1	1	0.0457	0	0	0.6329	negative regulation of developmental growth
9165	126	0	0	2	1	1	0.0465	0	0	0.6283	nucleotide biosynthetic process
43933	736	0	0	5	1	1	0.0481	0	0	0.6268	macromolecular complex subunit organization
1901293	129	0	0	2	1	1	0.0485	0	0	0.6388	nucleoside phosphate biosynthetic process
51961	19	0	0	1	1	1	0.0509	0	0	0.6311	negative regulation of nervous system development
45926	19	0	0	1	1	1	0.0509	0	0	0.6311	negative regulation of growth
43410	19	0	0	1	1	1	0.0509	0	0	0.6311	positive regulation of MAPK cascade
10721	19	0	0	1	1	1	0.0509	0	0	0.6311	negative regulation of cell development
6405	19	0	0	1	1	1	0.0509	0	0	0.6311	RNA export from nucleus
97485	134	0	0	2	1	1	0.0519	0	0	0.6247	neuron projection guidance
7411	134	0	0	2	1	1	0.0519	0	0	0.6247	axon guidance
71426	20	0	0	1	1	1	0.0535	0	0	0.6271	ribonucleoprotein complex export from nucleus
71166	20	0	0	1	1	1	0.0535	0	0	0.6271	ribonucleoprotein complex localization
7274	20	0	0	1	1	1	0.0535	0	0	0.6271	neuromuscular synaptic transmission
71902	21	0	0	1	1	1	0.0561	0	0	0.6164	positive regulation of protein serine/threonine kinase activity
51782	21	0	0	1	1	1	0.0561	0	0	0.6164	negative regulation of cell division
45596	21	0	0	1	1	1	0.0561	0	0	0.6164	negative regulation of cell differentiation
43405	21	0	0	1	1	1	0.0561	0	0	0.6164	regulation of MAP kinase activity
32386	21	0	0	1	1	1	0.0561	0	0	0.6164	regulation of intracellular transport
50803	22	0	0	1	1	1	0.0587	0	0	0.6213	regulation of synapse structure or activity
34329	22	0	0	1	1	1	0.0587	0	0	0.6213	cell junction assembly
33563	22	0	0	1	1	1	0.0587	0	0	0.6213	dorsal/ventral axon guidance
51028	23	0	0	1	1	1	0.0613	0	0	0.6371	mRNA transport
51049	152	0	0	2	1	1	0.0649	0	0	0.6491	regulation of transport
2000242	25	0	0	1	1	1	0.0665	0	0	0.6428	negative regulation of reproductive process
1902284	25	0	0	1	1	1	0.0665	0	0	0.6428	neuron projection extension involved in neuron projection guidance
48846	25	0	0	1	1	1	0.0665	0	0	0.6428	axon extension involved in axon guidance
10506	25	0	0	1	1	1	0.0665	0	0	0.6428	regulation of autophagy
30030	344	0	0	3	1	1	0.0672	0	0	0.6417	cell projection organization
50832	26	0	0	1	1	1	0.069	0	0	0.6403	defense response to fungus
34330	26	0	0	1	1	1	0.069	0	0	0.6403	cell junction organization
9064	26	0	0	1	1	1	0.069	0	0	0.6403	glutamine family amino acid metabolic process
19538	2241	0	0	10	1	1	0.0711	0	0	0.6419	protein metabolic process
51168	27	0	0	1	1	1	0.0716	0	0	0.634	nuclear export
50920	27	0	0	1	1	1	0.0716	0	0	0.634	regulation of chemotaxis
50806	27	0	0	1	1	1	0.0716	0	0	0.634	positive regulation of synaptic transmission
9620	27	0	0	1	1	1	0.0716	0	0	0.634	response to fungus
51674	354	0	0	3	1	1	0.072	0	0	0.6275	localization of cell
48870	354	0	0	3	1	1	0.072	0	0	0.6275	cell motility
51494	28	0	0	1	1	1	0.0742	0	0	0.6345	negative regulation of cytoskeleton organization
6941	28	0	0	1	1	1	0.0742	0	0	0.6345	striated muscle contraction
35262	30	0	0	1	1	1	0.0793	0	0	0.6579	gonad morphogenesis
1764	30	0	0	1	1	1	0.0793	0	0	0.6579	neuron migration
7409	173	0	0	2	1	1	0.0813	0	0	0.6592	axonogenesis
30516	31	0	0	1	1	1	0.0818	0	0	0.6609	regulation of axon extension
6163	174	0	0	2	1	1	0.0821	0	0	0.6579	purine nucleotide metabolic process
1990267	32	0	0	1	1	1	0.0843	0	0	0.6595	response to transition metal nanoparticle
61387	32	0	0	1	1	1	0.0843	0	0	0.6595	regulation of extent of cell growth
90174	33	0	0	1	1	1	0.0868	0	0	0.6612	organelle membrane fusion
18022	33	0	0	1	1	1	0.0868	0	0	0.6612	peptidyl-lysine methylation
6906	33	0	0	1	1	1	0.0868	0	0	0.6612	vesicle fusion
48667	180	0	0	2	1	1	0.087	0	0	0.6573	cell morphogenesis involved in neuron differentiation
904	181	0	0	2	1	1	0.0878	0	0	0.6557	cell morphogenesis involved in differentiation
51983	34	0	0	1	1	1	0.0894	0	0	0.6507	regulation of chromosome segregation
16579	34	0	0	1	1	1	0.0894	0	0	0.6507	protein deubiquitination
10970	34	0	0	1	1	1	0.0894	0	0	0.6507	establishment of localization by movement along microtubule
10948	34	0	0	1	1	1	0.0894	0	0	0.6507	negative regulation of cell cycle process
48812	184	0	0	2	1	1	0.0903	0	0	0.6496	neuron projection morphogenesis
226	187	0	0	2	1	1	0.0928	0	0	0.6575	microtubule cytoskeleton organization
1902533	36	0	0	1	1	1	0.0944	0	0	0.6578	positive regulation of intracellular signal transduction
40013	36	0	0	1	1	1	0.0944	0	0	0.6578	negative regulation of locomotion
32147	36	0	0	1	1	1	0.0944	0	0	0.6578	activation of protein kinase activity
7267	189	0	0	2	1	1	0.0945	0	0	0.6543	cell-cell signaling
43085	192	0	0	2	1	1	0.097	0	0	0.6547	positive regulation of catalytic activity
6935	192	0	0	2	1	1	0.097	0	0	0.6547	chemotaxis
72521	194	0	0	2	1	1	0.0987	0	0	0.6514	purine-containing compound metabolic process
50808	38	0	0	1	1	1	0.0993	0	0	0.6558	synapse organization
50770	39	0	0	1	1	1	0.1018	0	0	0.6631	regulation of axonogenesis
30705	39	0	0	1	1	1	0.1018	0	0	0.6631	cytoskeleton-dependent intracellular transport
40012	199	0	0	2	1	1	0.103	0	0	0.6617	regulation of locomotion
44093	200	0	0	2	1	1	0.1039	0	0	0.6556	positive regulation of molecular function
42330	200	0	0	2	1	1	0.1039	0	0	0.6556	taxis
51050	40	0	0	1	1	1	0.1043	0	0	0.6582	positive regulation of transport
48284	40	0	0	1	1	1	0.1043	0	0	0.6582	organelle fusion
51236	41	0	0	1	1	1	0.1068	0	0	0.6449	establishment of RNA localization
50658	41	0	0	1	1	1	0.1068	0	0	0.6449	RNA transport
50657	41	0	0	1	1	1	0.1068	0	0	0.6449	nucleic acid transport
43408	41	0	0	1	1	1	0.1068	0	0	0.6449	regulation of MAPK cascade
9168	41	0	0	1	1	1	0.1068	0	0	0.6449	purine ribonucleoside monophosphate biosynthetic process
9127	41	0	0	1	1	1	0.1068	0	0	0.6449	purine nucleoside monophosphate biosynthetic process
1558	41	0	0	1	1	1	0.1068	0	0	0.6449	regulation of cell growth
32989	424	0	0	3	1	1	0.1091	0	0	0.644	cellular component morphogenesis
71900	42	0	0	1	1	1	0.1092	0	0	0.6467	regulation of protein serine/threonine kinase activity
97480	43	0	0	1	1	1	0.1117	0	0	0.6447	establishment of synaptic vesicle localization
48489	43	0	0	1	1	1	0.1117	0	0	0.6447	synaptic vesicle transport
44801	43	0	0	1	1	1	0.1117	0	0	0.6447	single-organism membrane fusion
90407	209	0	0	2	1	1	0.1118	0	0	0.6426	organophosphate biosynthetic process
97479	44	0	0	1	1	1	0.1141	0	0	0.6416	synaptic vesicle localization
50804	44	0	0	1	1	1	0.1141	0	0	0.6416	modulation of synaptic transmission
10769	44	0	0	1	1	1	0.1141	0	0	0.6416	regulation of cell morphogenesis involved in differentiation
6403	44	0	0	1	1	1	0.1141	0	0	0.6416	RNA localization
44237	4112	0	0	15	1	1	0.116	0	0	0.6421	cellular metabolic process
8361	46	0	0	1	1	1	0.119	0	0	0.6468	regulation of cell size
7178	46	0	0	1	1	1	0.119	0	0	0.6468	transmembrane receptor protein serine/threonine kinase signaling pathway
45860	47	0	0	1	1	1	0.1214	0	0	0.6435	positive regulation of protein kinase activity
10639	47	0	0	1	1	1	0.1214	0	0	0.6435	negative regulation of organelle organization
9156	47	0	0	1	1	1	0.1214	0	0	0.6435	ribonucleoside monophosphate biosynthetic process
31331	48	0	0	1	1	1	0.1239	0	0	0.6431	positive regulation of cellular catabolic process
30322	48	0	0	1	1	1	0.1239	0	0	0.6431	stabilization of membrane potential
16050	48	0	0	1	1	1	0.1239	0	0	0.6431	vesicle organization
51650	49	0	0	1	1	1	0.1263	0	0	0.6427	establishment of vesicle localization
33674	49	0	0	1	1	1	0.1263	0	0	0.6427	positive regulation of kinase activity
51648	50	0	0	1	1	1	0.1287	0	0	0.6384	vesicle localization
10975	50	0	0	1	1	1	0.1287	0	0	0.6384	regulation of neuron projection development
9124	50	0	0	1	1	1	0.1287	0	0	0.6384	nucleoside monophosphate biosynthetic process
7009	50	0	0	1	1	1	0.1287	0	0	0.6384	plasma membrane organization
70646	51	0	0	1	1	1	0.1311	0	0	0.6443	protein modification by small protein removal
9117	231	0	0	2	1	1	0.1318	0	0	0.6425	nucleotide metabolic process
70507	52	0	0	1	1	1	0.1335	0	0	0.6432	regulation of microtubule cytoskeleton organization
9896	52	0	0	1	1	1	0.1335	0	0	0.6432	positive regulation of catabolic process
30036	233	0	0	2	1	1	0.1336	0	0	0.6406	actin cytoskeleton organization
6753	234	0	0	2	1	1	0.1346	0	0	0.6385	nucleoside phosphate metabolic process
8213	53	0	0	1	1	1	0.1359	0	0	0.6419	protein alkylation
6479	53	0	0	1	1	1	0.1359	0	0	0.6419	protein methylation
9987	7525	0	0	24	1	1	0.138	0	0	0.6415	cellular process
51347	54	0	0	1	1	1	0.1382	0	0	0.6454	positive regulation of transferase activity
48858	238	0	0	2	1	1	0.1383	0	0	0.6439	cell projection morphogenesis
30029	240	0	0	2	1	1	0.1402	0	0	0.6438	actin filament-based process
44260	3203	0	0	12	1	1	0.1406	0	0	0.6412	cellular macromolecule metabolic process
15931	55	0	0	1	1	1	0.1406	0	0	0.6429	nucleobase-containing compound transport
61564	241	0	0	2	1	1	0.1411	0	0	0.6411	axon development
32990	242	0	0	2	1	1	0.1421	0	0	0.6399	cell part morphogenesis
32101	56	0	0	1	1	1	0.143	0	0	0.6443	regulation of response to external stimulus
48232	57	0	0	1	1	1	0.1454	0	0	0.6448	male gamete generation
7283	57	0	0	1	1	1	0.1454	0	0	0.6448	spermatogenesis
22604	59	0	0	1	1	1	0.1501	0	0	0.6504	regulation of cell morphogenesis
7626	59	0	0	1	1	1	0.1501	0	0	0.6504	locomotory behavior
165	60	0	0	1	1	1	0.1524	0	0	0.655	MAPK cascade
45664	62	0	0	1	1	1	0.1571	0	0	0.6553	regulation of neuron differentiation
31344	62	0	0	1	1	1	0.1571	0	0	0.6553	regulation of cell projection organization
6936	62	0	0	1	1	1	0.1571	0	0	0.6553	muscle contraction
3012	62	0	0	1	1	1	0.1571	0	0	0.6553	muscle system process
50767	63	0	0	1	1	1	0.1594	0	0	0.6554	regulation of neurogenesis
43623	261	0	0	2	1	1	0.1602	0	0	0.6561	cellular protein complex assembly
902	264	0	0	2	1	1	0.1631	0	0	0.6583	cell morphogenesis
55086	265	0	0	2	1	1	0.1641	0	0	0.6585	nucleobase-containing small molecule metabolic process
44085	783	0	0	4	1	1	0.1644	0	0	0.6562	cellular component biogenesis
1902589	1072	0	0	5	1	1	0.1659	0	0	0.6543	single-organism organelle organization
6810	2309	0	0	9	1	1	0.1662	0	0	0.6518	transport
72657	66	0	0	1	1	1	0.1664	0	0	0.6477	protein localization to membrane
16482	66	0	0	1	1	1	0.1664	0	0	0.6477	cytosolic transport
9967	67	0	0	1	1	1	0.1687	0	0	0.6477	positive regulation of signal transduction
7018	67	0	0	1	1	1	0.1687	0	0	0.6477	microtubule-based movement
6468	520	0	0	3	1	1	0.1696	0	0	0.6463	protein phosphorylation
23051	273	0	0	2	1	1	0.1719	0	0	0.6485	regulation of signaling
51960	69	0	0	1	1	1	0.1732	0	0	0.6489	regulation of nervous system development
31175	275	0	0	2	1	1	0.1739	0	0	0.648	neuron projection development
1934	70	0	0	1	1	1	0.1755	0	0	0.652	positive regulation of protein phosphorylation
8152	5810	0	0	19	1	1	0.1795	0	0	0.6577	metabolic process
42327	72	0	0	1	1	1	0.1801	0	0	0.6585	positive regulation of phosphorylation
30334	72	0	0	1	1	1	0.1801	0	0	0.6585	regulation of cell migration
6914	72	0	0	1	1	1	0.1801	0	0	0.6585	autophagy
31329	73	0	0	1	1	1	0.1823	0	0	0.6576	regulation of cellular catabolic process
10646	284	0	0	2	1	1	0.1827	0	0	0.6581	regulation of cell communication
60284	74	0	0	1	1	1	0.1846	0	0	0.6577	regulation of cell development
18205	74	0	0	1	1	1	0.1846	0	0	0.6577	peptidyl-lysine modification
2000145	75	0	0	1	1	1	0.1869	0	0	0.6605	regulation of cell motility
22603	75	0	0	1	1	1	0.1869	0	0	0.6605	regulation of anatomical structure morphogenesis
42391	76	0	0	1	1	1	0.1891	0	0	0.6617	regulation of membrane potential
32535	76	0	0	1	1	1	0.1891	0	0	0.6617	regulation of cellular component size
45937	77	0	0	1	1	1	0.1913	0	0	0.6586	positive regulation of phosphate metabolic process
10562	77	0	0	1	1	1	0.1913	0	0	0.6586	positive regulation of phosphorus metabolic process
7052	77	0	0	1	1	1	0.1913	0	0	0.6586	mitotic spindle organization
23014	78	0	0	1	1	1	0.1936	0	0	0.6579	signal transduction by protein phosphorylation
9887	78	0	0	1	1	1	0.1936	0	0	0.6579	organ morphogenesis
51234	2394	0	0	9	1	1	0.1946	0	0	0.657	establishment of localization
1990138	79	0	0	1	1	1	0.1958	0	0	0.6546	neuron projection extension
48675	79	0	0	1	1	1	0.1958	0	0	0.6546	axon extension
48666	298	0	0	2	1	1	0.1967	0	0	0.6531	neuron development
60341	80	0	0	1	1	1	0.198	0	0	0.6532	regulation of cellular localization
45859	80	0	0	1	1	1	0.198	0	0	0.6532	regulation of protein kinase activity
43414	81	0	0	1	1	1	0.2002	0	0	0.6534	macromolecule methylation
50829	82	0	0	1	1	1	0.2025	0	0	0.6545	defense response to Gram-negative bacterium
48522	572	0	0	3	1	1	0.2058	0	0	0.6564	positive regulation of cellular process
1902582	308	0	0	2	1	1	0.2067	0	0	0.6546	single-organism intracellular transport
60560	84	0	0	1	1	1	0.2069	0	0	0.6538	developmental growth involved in morphogenesis
9894	84	0	0	1	1	1	0.2069	0	0	0.6538	regulation of catabolic process
43549	85	0	0	1	1	1	0.2091	0	0	0.6542	regulation of kinase activity
10256	85	0	0	1	1	1	0.2091	0	0	0.6542	endomembrane system organization
71805	86	0	0	1	1	1	0.2112	0	0	0.6522	potassium ion transmembrane transport
71804	86	0	0	1	1	1	0.2112	0	0	0.6522	cellular potassium ion transport
48588	86	0	0	1	1	1	0.2112	0	0	0.6522	developmental cell growth
31401	86	0	0	1	1	1	0.2112	0	0	0.6522	positive regulation of protein modification process
90066	88	0	0	1	1	1	0.2156	0	0	0.6553	regulation of anatomical structure size
30154	1176	0	0	5	1	1	0.2162	0	0	0.6535	cell differentiation
7166	318	0	0	2	1	1	0.2169	0	0	0.6522	cell surface receptor signaling pathway
6913	89	0	0	1	1	1	0.2178	0	0	0.6553	nucleocytoplasmic transport
51169	90	0	0	1	1	1	0.2199	0	0	0.6568	nuclear transport
9152	90	0	0	1	1	1	0.2199	0	0	0.6568	purine ribonucleotide biosynthetic process
44765	1499	0	0	6	1	1	0.2221	0	0	0.6574	single-organism transport
30182	325	0	0	2	1	1	0.224	0	0	0.6591	neuron differentiation
51338	92	0	0	1	1	1	0.2242	0	0	0.6581	regulation of transferase activity
7218	92	0	0	1	1	1	0.2242	0	0	0.6581	neuropeptide signaling pathway
50790	330	0	0	2	1	1	0.2291	0	0	0.664	regulation of catalytic activity
51493	95	0	0	1	1	1	0.2307	0	0	0.6646	regulation of cytoskeleton organization
45786	97	0	0	1	1	1	0.2349	0	0	0.6651	negative regulation of cell cycle
43652	97	0	0	1	1	1	0.2349	0	0	0.6651	engulfment of apoptotic cell
16049	97	0	0	1	1	1	0.2349	0	0	0.6651	cell growth
6813	98	0	0	1	1	1	0.237	0	0	0.6681	potassium ion transport
46390	99	0	0	1	1	1	0.2392	0	0	0.6716	ribose phosphate biosynthetic process
9260	99	0	0	1	1	1	0.2392	0	0	0.6716	ribonucleotide biosynthetic process
7126	341	0	0	2	1	1	0.2403	0	0	0.6699	meiotic nuclear division
51179	3198	0	0	11	1	1	0.2414	0	0	0.6716	localization
31325	344	0	0	2	1	1	0.2434	0	0	0.67	positive regulation of cellular metabolic process
6911	101	0	0	1	1	1	0.2434	0	0	0.6704	phagocytosis, engulfment
9653	1230	0	0	5	1	1	0.2442	0	0	0.6694	anatomical structure morphogenesis
48699	345	0	0	2	1	1	0.2444	0	0	0.6663	generation of neurons
19637	345	0	0	2	1	1	0.2444	0	0	0.6663	organophosphate metabolic process
1903046	347	0	0	2	1	1	0.2464	0	0	0.6674	meiotic cell cycle process
16477	347	0	0	2	1	1	0.2464	0	0	0.6674	cell migration
10324	103	0	0	1	1	1	0.2475	0	0	0.6617	membrane invagination
9167	103	0	0	1	1	1	0.2475	0	0	0.6617	purine ribonucleoside monophosphate metabolic process
9126	103	0	0	1	1	1	0.2475	0	0	0.6617	purine nucleoside monophosphate metabolic process
6357	348	0	0	2	1	1	0.2475	0	0	0.6658	regulation of transcription from RNA polymerase II promoter
22008	350	0	0	2	1	1	0.2495	0	0	0.6612	neurogenesis
48584	105	0	0	1	1	1	0.2517	0	0	0.6654	positive regulation of response to stimulus
43547	105	0	0	1	1	1	0.2517	0	0	0.6654	positive regulation of GTPase activity
48869	1245	0	0	5	1	1	0.2521	0	0	0.6637	cellular developmental process
65009	358	0	0	2	1	1	0.2577	0	0	0.6695	regulation of molecular function
1901605	108	0	0	1	1	1	0.2579	0	0	0.6689	alpha-amino acid metabolic process
43087	109	0	0	1	1	1	0.26	0	0	0.6669	regulation of GTPase activity
40020	109	0	0	1	1	1	0.26	0	0	0.6669	regulation of meiotic nuclear division
9161	109	0	0	1	1	1	0.26	0	0	0.6669	ribonucleoside monophosphate metabolic process
398	110	0	0	1	1	1	0.262	0	0	0.6658	mRNA splicing, via spliceosome
377	110	0	0	1	1	1	0.262	0	0	0.6658	RNA splicing, via transesterification reactions with bulged adenosine as nucleophile
40007	649	0	0	3	1	1	0.2625	0	0	0.6647	growth
9893	364	0	0	2	1	1	0.2639	0	0	0.6637	positive regulation of metabolic process
1932	111	0	0	1	1	1	0.2641	0	0	0.6644	regulation of protein phosphorylation
1902578	1588	0	0	6	1	1	0.2642	0	0	0.6628	single-organism localization
70271	366	0	0	2	1	1	0.2659	0	0	0.6631	protein complex biogenesis
6461	366	0	0	2	1	1	0.2659	0	0	0.6631	protein complex assembly
42742	112	0	0	1	1	1	0.2661	0	0	0.6628	defense response to bacterium
9123	112	0	0	1	1	1	0.2661	0	0	0.6628	nucleoside monophosphate metabolic process
9617	114	0	0	1	1	1	0.2702	0	0	0.666	response to bacterium
375	114	0	0	1	1	1	0.2702	0	0	0.666	RNA splicing, via transesterification reactions
45595	115	0	0	1	1	1	0.2722	0	0	0.6666	regulation of cell differentiation
43277	115	0	0	1	1	1	0.2722	0	0	0.6666	apoptotic cell clearance
22607	666	0	0	3	1	1	0.2753	0	0	0.6696	cellular component assembly
48585	118	0	0	1	1	1	0.2782	0	0	0.6697	negative regulation of response to stimulus
48583	380	0	0	2	1	1	0.2803	0	0	0.6697	regulation of response to stimulus
6366	382	0	0	2	1	1	0.2824	0	0	0.672	transcription from RNA polymerase II promoter
42325	121	0	0	1	1	1	0.2842	0	0	0.6723	regulation of phosphorylation
46907	384	0	0	2	1	1	0.2845	0	0	0.6708	intracellular transport
51345	123	0	0	1	1	1	0.2882	0	0	0.6707	positive regulation of hydrolase activity
18991	389	0	0	2	1	1	0.2896	0	0	0.6696	oviposition
16310	685	0	0	3	1	1	0.2898	0	0	0.6694	phosphorylation
6909	124	0	0	1	1	1	0.2902	0	0	0.669	phagocytosis
51321	396	0	0	2	1	1	0.2968	0	0	0.6735	meiotic cell cycle
7399	396	0	0	2	1	1	0.2968	0	0	0.6735	nervous system development
44763	5834	0	0	18	1	1	0.2974	0	0	0.6719	single-organism cellular process
6996	1330	0	0	5	1	1	0.2986	0	0	0.6714	organelle organization
51128	398	0	0	2	1	1	0.2988	0	0	0.6704	regulation of cellular component organization
32259	131	0	0	1	1	1	0.3038	0	0	0.6731	methylation
16192	1018	0	0	4	1	1	0.3043	0	0	0.6716	vesicle-mediated transport
98542	132	0	0	1	1	1	0.3058	0	0	0.672	defense response to other organism
1902531	133	0	0	1	1	1	0.3077	0	0	0.6688	regulation of intracellular signal transduction
44238	4430	0	0	14	1	1	0.3077	0	0	0.6704	primary metabolic process
8380	133	0	0	1	1	1	0.3077	0	0	0.6688	RNA splicing
34622	407	0	0	2	1	1	0.3081	0	0	0.6675	cellular macromolecular complex assembly
51707	135	0	0	1	1	1	0.3116	0	0	0.6706	response to other organism
43207	135	0	0	1	1	1	0.3116	0	0	0.6706	response to external biotic stimulus
9607	135	0	0	1	1	1	0.3116	0	0	0.6706	response to biotic stimulus
48518	1034	0	0	4	1	1	0.3146	0	0	0.671	positive regulation of biological process
43170	3750	0	0	12	1	1	0.3168	0	0	0.6703	macromolecule metabolic process
51783	139	0	0	1	1	1	0.3192	0	0	0.6723	regulation of nuclear division
51174	141	0	0	1	1	1	0.323	0	0	0.6715	regulation of phosphorus metabolic process
32270	141	0	0	1	1	1	0.323	0	0	0.6715	positive regulation of cellular protein metabolic process
19220	141	0	0	1	1	1	0.323	0	0	0.6715	regulation of phosphate metabolic process
48638	427	0	0	2	1	1	0.3285	0	0	0.6716	regulation of developmental growth
71688	145	0	0	1	1	1	0.3304	0	0	0.6734	striated muscle myosin thick filament assembly
51247	145	0	0	1	1	1	0.3304	0	0	0.6734	positive regulation of protein metabolic process
31034	146	0	0	1	1	1	0.3323	0	0	0.673	myosin filament assembly
31033	146	0	0	1	1	1	0.3323	0	0	0.673	myosin filament organization
7167	147	0	0	1	1	1	0.3342	0	0	0.6729	enzyme linked receptor protein signaling pathway
9605	438	0	0	2	1	1	0.3397	0	0	0.6773	response to external stimulus
19098	439	0	0	2	1	1	0.3407	0	0	0.6766	reproductive behavior
51445	152	0	0	1	1	1	0.3434	0	0	0.6775	regulation of meiotic cell cycle
31399	153	0	0	1	1	1	0.3452	0	0	0.6782	regulation of protein modification process
42254	155	0	0	1	1	1	0.3488	0	0	0.6813	ribosome biogenesis
40008	448	0	0	2	1	1	0.3499	0	0	0.6801	regulation of growth
71705	158	0	0	1	1	1	0.3543	0	0	0.6806	nitrogen compound transport
6397	159	0	0	1	1	1	0.3561	0	0	0.681	mRNA processing
280	455	0	0	2	1	1	0.3569	0	0	0.6807	nuclear division
45165	160	0	0	1	1	1	0.3579	0	0	0.6828	cell fate commitment
51656	161	0	0	1	1	1	0.3596	0	0	0.6822	establishment of organelle localization
30239	161	0	0	1	1	1	0.3596	0	0	0.6822	myofibril assembly
48285	461	0	0	2	1	1	0.363	0	0	0.681	organelle fission
31032	163	0	0	1	1	1	0.3632	0	0	0.68	actomyosin structure organization
99537	167	0	0	1	1	1	0.3703	0	0	0.6822	trans-synaptic signaling
98916	167	0	0	1	1	1	0.3703	0	0	0.6822	anterograde trans-synaptic signaling
55002	167	0	0	1	1	1	0.3703	0	0	0.6822	striated muscle cell development
7268	167	0	0	1	1	1	0.3703	0	0	0.6822	synaptic transmission
34654	1122	0	0	4	1	1	0.3714	0	0	0.681	nucleobase-containing compound biosynthetic process
55001	169	0	0	1	1	1	0.3738	0	0	0.6811	muscle cell development
51146	169	0	0	1	1	1	0.3738	0	0	0.6811	striated muscle cell differentiation
6520	170	0	0	1	1	1	0.3755	0	0	0.6823	cellular amino acid metabolic process
99536	171	0	0	1	1	1	0.3773	0	0	0.683	synaptic signaling
51640	171	0	0	1	1	1	0.3773	0	0	0.683	organelle localization
9150	172	0	0	1	1	1	0.379	0	0	0.6838	purine ribonucleotide metabolic process
40011	1813	0	0	6	1	1	0.3791	0	0	0.6825	locomotion
45132	174	0	0	1	1	1	0.3825	0	0	0.6839	meiotic chromosome segregation
51302	177	0	0	1	1	1	0.3876	0	0	0.685	regulation of cell division
65003	486	0	0	2	1	1	0.3879	0	0	0.6845	macromolecular complex assembly
71704	4652	0	0	14	1	1	0.3912	0	0	0.686	organic substance metabolic process
19438	1154	0	0	4	1	1	0.3922	0	0	0.6848	aromatic compound biosynthetic process
45944	181	0	0	1	1	1	0.3944	0	0	0.6845	positive regulation of transcription from RNA polymerase II promoter
9259	181	0	0	1	1	1	0.3944	0	0	0.6845	ribonucleotide metabolic process
42692	183	0	0	1	1	1	0.3978	0	0	0.6858	muscle cell differentiation
48589	497	0	0	2	1	1	0.3988	0	0	0.6847	developmental growth
18130	1166	0	0	4	1	1	0.4	0	0	0.6842	heterocycle biosynthetic process
19693	187	0	0	1	1	1	0.4045	0	0	0.6857	ribose phosphate metabolic process
51649	506	0	0	2	1	1	0.4076	0	0	0.6861	establishment of localization in cell
44711	509	0	0	2	1	1	0.4105	0	0	0.6871	single-organism biosynthetic process
1901362	1188	0	0	4	1	1	0.4142	0	0	0.6893	organic cyclic compound biosynthetic process
48523	516	0	0	2	1	1	0.4173	0	0	0.6895	negative regulation of cellular process
45893	196	0	0	1	1	1	0.4193	0	0	0.6895	positive regulation of transcription, DNA-templated
1903508	197	0	0	1	1	1	0.4209	0	0	0.6883	positive regulation of nucleic acid-templated transcription
1902680	197	0	0	1	1	1	0.4209	0	0	0.6883	positive regulation of RNA biosynthetic process
55085	863	0	0	3	1	1	0.4261	0	0	0.6911	transmembrane transport
51254	201	0	0	1	1	1	0.4273	0	0	0.6903	positive regulation of RNA metabolic process
44248	529	0	0	2	1	1	0.4299	0	0	0.6892	cellular catabolic process
61061	206	0	0	1	1	1	0.4353	0	0	0.6919	muscle structure development
10564	209	0	0	1	1	1	0.44	0	0	0.6931	regulation of cell cycle process
51336	210	0	0	1	1	1	0.4416	0	0	0.6937	regulation of hydrolase activity
16071	210	0	0	1	1	1	0.4416	0	0	0.6937	mRNA metabolic process
70647	211	0	0	1	1	1	0.4432	0	0	0.6926	protein modification by small protein conjugation or removal
10927	211	0	0	1	1	1	0.4432	0	0	0.6926	cellular component assembly involved in morphogenesis
34220	544	0	0	2	1	1	0.4442	0	0	0.6916	ion transmembrane transport
45935	213	0	0	1	1	1	0.4463	0	0	0.6932	positive regulation of nucleobase-containing compound metabolic process
8104	549	0	0	2	1	1	0.449	0	0	0.6942	protein localization
10557	220	0	0	1	1	1	0.457	0	0	0.6984	positive regulation of macromolecule biosynthetic process
2000241	223	0	0	1	1	1	0.4616	0	0	0.7001	regulation of reproductive process
98813	224	0	0	1	1	1	0.4631	0	0	0.7006	nuclear chromosome segregation
31328	225	0	0	1	1	1	0.4646	0	0	0.6983	positive regulation of cellular biosynthetic process
22613	225	0	0	1	1	1	0.4646	0	0	0.6983	ribonucleoprotein complex biogenesis
9891	225	0	0	1	1	1	0.4646	0	0	0.6983	positive regulation of biosynthetic process
51173	227	0	0	1	1	1	0.4676	0	0	0.6992	positive regulation of nitrogen compound metabolic process
9966	232	0	0	1	1	1	0.475	0	0	0.7031	regulation of signal transduction
48468	935	0	0	3	1	1	0.4795	0	0	0.7067	cell development
51603	237	0	0	1	1	1	0.4823	0	0	0.7062	proteolysis involved in cellular protein catabolic process
10628	239	0	0	1	1	1	0.4852	0	0	0.7081	positive regulation of gene expression
1902580	241	0	0	1	1	1	0.4881	0	0	0.7099	single-organism cellular localization
44257	244	0	0	1	1	1	0.4924	0	0	0.7115	cellular protein catabolic process
7059	246	0	0	1	1	1	0.4952	0	0	0.712	chromosome segregation
30001	252	0	0	1	1	1	0.5037	0	0	0.7135	metal ion transport
51641	612	0	0	2	1	1	0.5067	0	0	0.713	cellular localization
48609	984	0	0	3	1	1	0.5147	0	0	0.7167	multicellular organismal reproductive process
33043	261	0	0	1	1	1	0.5161	0	0	0.719	regulation of organelle organization
1901566	630	0	0	2	1	1	0.5225	0	0	0.7233	organonitrogen compound biosynthetic process
51093	269	0	0	1	1	1	0.5269	0	0	0.7253	negative regulation of developmental process
50794	3186	0	0	9	1	1	0.5274	0	0	0.724	regulation of cellular process
32504	1006	0	0	3	1	1	0.5301	0	0	0.7238	multicellular organism reproduction
15672	275	0	0	1	1	1	0.5348	0	0	0.7281	monovalent inorganic cation transport
51241	276	0	0	1	1	1	0.5361	0	0	0.7279	negative regulation of multicellular organismal process
22402	647	0	0	2	1	1	0.5372	0	0	0.7268	cell cycle process
1903047	277	0	0	1	1	1	0.5374	0	0	0.726	mitotic cell cycle process
48646	277	0	0	1	1	1	0.5374	0	0	0.726	anatomical structure formation involved in morphogenesis
6508	651	0	0	2	1	1	0.5406	0	0	0.7269	proteolysis
8219	656	0	0	2	1	1	0.5448	0	0	0.7288	cell death
1901137	288	0	0	1	1	1	0.5515	0	0	0.7362	carbohydrate derivative biosynthetic process
98662	290	0	0	1	1	1	0.5541	0	0	0.7373	inorganic cation transmembrane transport
45087	292	0	0	1	1	1	0.5566	0	0	0.7365	innate immune response
6955	297	0	0	1	1	1	0.5628	0	0	0.7377	immune response
2376	299	0	0	1	1	1	0.5652	0	0	0.7379	immune system process
70925	322	0	0	1	1	1	0.5926	0	0	0.7546	organelle assembly
34613	323	0	0	1	1	1	0.5938	0	0	0.7539	cellular protein localization
70727	326	0	0	1	1	1	0.5972	0	0	0.7546	cellular macromolecule localization
51726	331	0	0	1	1	1	0.6029	0	0	0.7549	regulation of cell cycle
44281	735	0	0	2	1	1	0.6083	0	0	0.7553	small molecule metabolic process
44271	1509	0	0	4	1	1	0.6096	0	0	0.755	cellular nitrogen compound biosynthetic process
44265	339	0	0	1	1	1	0.6118	0	0	0.755	cellular macromolecule catabolic process
6811	741	0	0	2	1	1	0.6128	0	0	0.7541	ion transport
6139	1901	0	0	5	1	1	0.6162	0	0	0.7557	nucleobase-containing compound metabolic process
10604	344	0	0	1	1	1	0.6172	0	0	0.7566	positive regulation of macromolecule metabolic process
42221	1139	0	0	3	1	1	0.6178	0	0	0.7555	response to chemical
7049	749	0	0	2	1	1	0.6189	0	0	0.757	cell cycle
65008	1144	0	0	3	1	1	0.6209	0	0	0.7574	regulation of biological quality
278	355	0	0	1	1	1	0.629	0	0	0.7641	mitotic cell cycle
98655	358	0	0	1	1	1	0.6321	0	0	0.7656	cation transmembrane transport
6396	360	0	0	1	1	1	0.6342	0	0	0.7659	RNA processing
32268	362	0	0	1	1	1	0.6363	0	0	0.766	regulation of cellular protein metabolic process
50789	3819	0	0	10	1	1	0.6387	0	0	0.767	regulation of biological process
40018	365	0	0	1	1	1	0.6394	0	0	0.7661	positive regulation of multicellular organism growth
98660	366	0	0	1	1	1	0.6404	0	0	0.7665	inorganic ion transmembrane transport
18193	366	0	0	1	1	1	0.6404	0	0	0.7665	peptidyl-amino acid modification
46483	1951	0	0	5	1	1	0.6408	0	0	0.764	heterocycle metabolic process
6725	1951	0	0	5	1	1	0.6408	0	0	0.764	cellular aromatic compound metabolic process
48639	372	0	0	1	1	1	0.6465	0	0	0.7662	positive regulation of developmental growth
51301	373	0	0	1	1	1	0.6475	0	0	0.7651	cell division
51246	373	0	0	1	1	1	0.6475	0	0	0.7651	regulation of protein metabolic process
22414	1966	0	0	5	1	1	0.6481	0	0	0.764	reproductive process
9056	795	0	0	2	1	1	0.6521	0	0	0.7647	catabolic process
44702	1601	0	0	4	1	1	0.6587	0	0	0.7678	single organism reproductive process
50793	807	0	0	2	1	1	0.6604	0	0	0.7668	regulation of developmental process
1901360	1994	0	0	5	1	1	0.6613	0	0	0.7656	organic cyclic compound metabolic process
45927	390	0	0	1	1	1	0.6641	0	0	0.7667	positive regulation of growth
19752	395	0	0	1	1	1	0.6689	0	0	0.767	carboxylic acid metabolic process
40014	397	0	0	1	1	1	0.6707	0	0	0.768	regulation of multicellular organism growth
44700	2023	0	0	5	1	1	0.6748	0	0	0.769	single organism signaling
23052	2025	0	0	5	1	1	0.6757	0	0	0.7682	signaling
33036	1246	0	0	3	1	1	0.6804	0	0	0.7685	macromolecule localization
2000026	408	0	0	1	1	1	0.6809	0	0	0.7681	regulation of multicellular organismal development
51239	840	0	0	2	1	1	0.6825	0	0	0.7675	regulation of multicellular organismal process
35264	410	0	0	1	1	1	0.6827	0	0	0.7667	multicellular organism growth
9792	3189	0	0	8	1	1	0.6835	0	0	0.7655	embryo development ending in birth or egg hatching
30163	413	0	0	1	1	1	0.6854	0	0	0.765	protein catabolic process
43436	417	0	0	1	1	1	0.689	0	0	0.7643	oxoacid metabolic process
6082	417	0	0	1	1	1	0.689	0	0	0.7643	organic acid metabolic process
7154	2069	0	0	5	1	1	0.6954	0	0	0.7655	cell communication
31323	1286	0	0	3	1	1	0.7019	0	0	0.766	regulation of cellular metabolic process
6897	872	0	0	2	1	1	0.7028	0	0	0.7654	endocytosis
6812	433	0	0	1	1	1	0.7029	0	0	0.7654	cation transport
6952	437	0	0	1	1	1	0.7063	0	0	0.7654	defense response
35556	439	0	0	1	1	1	0.7079	0	0	0.7663	intracellular signal transduction
48519	881	0	0	2	1	1	0.7083	0	0	0.7654	negative regulation of biological process
6355	883	0	0	2	1	1	0.7095	0	0	0.7645	regulation of transcription, DNA-templated
9790	3264	0	0	8	1	1	0.7119	0	0	0.7635	embryo development
2001141	890	0	0	2	1	1	0.7137	0	0	0.7619	regulation of RNA biosynthetic process
1903506	890	0	0	2	1	1	0.7137	0	0	0.7619	regulation of nucleic acid-templated transcription
7610	890	0	0	2	1	1	0.7137	0	0	0.7619	behavior
51704	892	0	0	2	1	1	0.7149	0	0	0.761	multi-organism process
51252	911	0	0	2	1	1	0.7261	0	0	0.7641	regulation of RNA metabolic process
1901564	912	0	0	2	1	1	0.7267	0	0	0.7642	organonitrogen compound metabolic process
10259	923	0	0	2	1	1	0.733	0	0	0.7636	multicellular organism aging
8340	923	0	0	2	1	1	0.733	0	0	0.7636	determination of adult lifespan
7568	925	0	0	2	1	1	0.7342	0	0	0.7626	aging
51094	472	0	0	1	1	1	0.7343	0	0	0.7612	positive regulation of developmental process
33554	472	0	0	1	1	1	0.7343	0	0	0.7612	cellular response to stress
51240	477	0	0	1	1	1	0.7381	0	0	0.7604	positive regulation of multicellular organismal process
6351	934	0	0	2	1	1	0.7392	0	0	0.7595	transcription, DNA-templated
97659	940	0	0	2	1	1	0.7425	0	0	0.7599	nucleic acid-templated transcription
1901135	486	0	0	1	1	1	0.7448	0	0	0.7606	carbohydrate derivative metabolic process
32774	945	0	0	2	1	1	0.7453	0	0	0.7596	RNA biosynthetic process
19219	946	0	0	2	1	1	0.7458	0	0	0.7587	regulation of nucleobase-containing compound metabolic process
16070	1407	0	0	3	1	1	0.7607	0	0	0.7628	RNA metabolic process
65007	4550	0	0	11	1	1	0.7652	0	0	0.7629	biological regulation
2000112	995	0	0	2	1	1	0.7714	0	0	0.7663	regulation of cellular macromolecule biosynthetic process
10556	1001	0	0	2	1	1	0.7744	0	0	0.7656	regulation of macromolecule biosynthetic process
10033	531	0	0	1	1	1	0.7758	0	0	0.7655	response to organic substance
31326	1008	0	0	2	1	1	0.7779	0	0	0.765	regulation of cellular biosynthetic process
9889	1009	0	0	2	1	1	0.7783	0	0	0.7641	regulation of biosynthetic process
9057	542	0	0	1	1	1	0.7828	0	0	0.7637	macromolecule catabolic process
34641	2290	0	0	5	1	1	0.7829	0	0	0.7626	cellular nitrogen compound metabolic process
7165	1882	0	0	4	1	1	0.7835	0	0	0.7615	signal transduction
19222	1469	0	0	3	1	1	0.7872	0	0	0.7624	regulation of metabolic process
3	3108	0	0	7	1	1	0.7902	0	0	0.7616	reproduction
51171	1036	0	0	2	1	1	0.7912	0	0	0.7615	regulation of nitrogen compound metabolic process
44249	1917	0	0	4	1	1	0.7964	0	0	0.7617	cellular biosynthetic process
44710	1918	0	0	4	1	1	0.7967	0	0	0.7608	single-organism metabolic process
6915	569	0	0	1	1	1	0.7991	0	0	0.7604	apoptotic process
7276	579	0	0	1	1	1	0.8048	0	0	0.7615	gamete generation
12501	587	0	0	1	1	1	0.8093	0	0	0.7629	programmed cell death
71702	599	0	0	1	1	1	0.8158	0	0	0.7631	organic substance transport
48856	5119	0	0	12	1	1	0.8214	0	0	0.7629	anatomical structure development
1901576	1995	0	0	4	1	1	0.8229	0	0	0.7627	organic substance biosynthetic process
55114	613	0	0	1	1	1	0.8232	0	0	0.7619	oxidation-reduction process
7186	630	0	0	1	1	1	0.8317	0	0	0.7628	G-protein coupled receptor signaling pathway
48731	1597	0	0	3	1	1	0.8346	0	0	0.7627	system development
9058	2045	0	0	4	1	1	0.8385	0	0	0.7634	biosynthetic process
6807	2473	0	0	5	1	1	0.8405	0	0	0.7633	nitrogen compound metabolic process
90304	1622	0	0	3	1	1	0.8427	0	0	0.7633	nucleic acid metabolic process
3008	657	0	0	1	1	1	0.8444	0	0	0.764	system process
7275	4851	0	0	11	1	1	0.847	0	0	0.7635	multicellular organism development
44767	5238	0	0	12	1	1	0.8505	0	0	0.7634	single-organism developmental process
10468	1185	0	0	2	1	1	0.8513	0	0	0.7624	regulation of gene expression
44699	8727	0	0	22	1	1	0.8538	0	0	0.7618	single-organism process
32502	5277	0	0	12	1	1	0.8593	0	0	0.7619	developmental process
19953	703	0	0	1	1	1	0.864	0	0	0.7616	sexual reproduction
44703	713	0	0	1	1	1	0.8679	0	0	0.7621	multi-organism reproductive process
80090	1267	0	0	2	1	1	0.8774	0	0	0.7629	regulation of primary metabolic process
6898	742	0	0	1	1	1	0.8787	0	0	0.7628	receptor-mediated endocytosis
51716	2200	0	0	4	1	1	0.8801	0	0	0.7617	cellular response to stimulus
1901575	749	0	0	1	1	1	0.8812	0	0	0.7613	organic substance catabolic process
44707	5046	0	0	11	1	1	0.8882	0	0	0.7617	single-multicellular organism process
10467	1789	0	0	3	1	1	0.8893	0	0	0.7609	gene expression
60255	1422	0	0	2	1	1	0.916	0	0	0.7663	regulation of macromolecule metabolic process
32501	5670	0	0	12	1	1	0.9287	0	0	0.7707	multicellular organismal process
50896	2919	0	0	5	1	1	0.9322	0	0	0.7721	response to stimulus
34645	1518	0	0	2	1	1	0.934	0	0	0.7722	cellular macromolecule biosynthetic process
9059	1524	0	0	2	1	1	0.935	0	0	0.7714	macromolecule biosynthetic process
45137	984	0	0	1	1	1	0.941	0	0	0.7702	development of primary sexual characteristics
8406	984	0	0	1	1	1	0.941	0	0	0.7702	gonad development
61458	995	0	0	1	1	1	0.9429	0	0	0.7687	reproductive system development
48608	995	0	0	1	1	1	0.9429	0	0	0.7687	reproductive structure development
6950	1039	0	0	1	1	1	0.95	0	0	0.7706	response to stress
7548	1072	0	0	1	1	1	0.9548	0	0	0.77	sex differentiation
48513	1270	0	0	1	1	1	0.9754	0	0	0.7745	animal organ development
3006	1372	0	0	1	1	1	0.9821	0	0	0.7751	developmental process involved in reproduction
2119	2315	0	0	2	1	1	0.9927	0	0	0.7762	nematode larval development
2164	2318	0	0	2	1	1	0.9928	0	0	0.7749	larval development
9791	2334	0	0	2	1	1	0.9931	0	0	0.7737	post-embryonic development
2001272	1	0	0	0	1	1	1	0	0	0.9184	positive regulation of cysteine-type endopeptidase activity involved in execution phase of apoptosis
2001270	1	0	0	0	1	1	1	0	0	0.9184	regulation of cysteine-type endopeptidase activity involved in execution phase of apoptosis
2001259	1	0	0	0	1	1	1	0	0	0.9184	positive regulation of cation channel activity
2001258	2	0	0	0	1	1	1	0	0	0.9842	negative regulation of cation channel activity
2001257	5	0	0	0	1	1	1	0	0	0.9789	regulation of cation channel activity
2001256	1	0	0	0	1	1	1	0	0	0.9184	regulation of store-operated calcium entry
2001252	9	0	0	0	1	1	1	0	0	0.9942	positive regulation of chromosome organization
2001251	15	0	0	0	1	1	1	0	0	0.922	negative regulation of chromosome organization
2001244	1	0	0	0	1	1	1	0	0	0.9184	positive regulation of intrinsic apoptotic signaling pathway
2001243	5	0	0	0	1	1	1	0	0	0.9789	negative regulation of intrinsic apoptotic signaling pathway
2001242	9	0	0	0	1	1	1	0	0	0.9942	regulation of intrinsic apoptotic signaling pathway
2001235	4	0	0	0	1	1	1	0	0	0.9412	positive regulation of apoptotic signaling pathway
2001234	5	0	0	0	1	1	1	0	0	0.9789	negative regulation of apoptotic signaling pathway
2001233	12	0	0	0	1	1	1	0	0	0.9974	regulation of apoptotic signaling pathway
2001197	1	0	0	0	1	1	1	0	0	0.9184	basement membrane assembly involved in embryonic body morphogenesis
2001057	1	0	0	0	1	1	1	0	0	0.9184	reactive nitrogen species metabolic process
2001056	7	0	0	0	1	1	1	0	0	0.9979	positive regulation of cysteine-type endopeptidase activity
2001024	1	0	0	0	1	1	1	0	0	0.9184	negative regulation of response to drug
2001023	1	0	0	0	1	1	1	0	0	0.9184	regulation of response to drug
2001022	4	0	0	0	1	1	1	0	0	0.9412	positive regulation of response to DNA damage stimulus
2001021	15	0	0	0	1	1	1	0	0	0.922	negative regulation of response to DNA damage stimulus
2001020	20	0	0	0	1	1	1	0	0	0.9286	regulation of response to DNA damage stimulus
2000816	7	0	0	0	1	1	1	0	0	0.9979	negative regulation of mitotic sister chromatid separation
2000786	2	0	0	0	1	1	1	0	0	0.9842	positive regulation of autophagosome assembly
2000785	6	0	0	0	1	1	1	0	0	0.9891	regulation of autophagosome assembly
2000779	2	0	0	0	1	1	1	0	0	0.9842	regulation of double-strand break repair
2000766	4	0	0	0	1	1	1	0	0	0.9412	negative regulation of cytoplasmic translation
2000765	4	0	0	0	1	1	1	0	0	0.9412	regulation of cytoplasmic translation
2000758	3	0	0	0	1	1	1	0	0	0.9976	positive regulation of peptidyl-lysine acetylation
2000757	2	0	0	0	1	1	1	0	0	0.9842	negative regulation of peptidyl-lysine acetylation
2000756	4	0	0	0	1	1	1	0	0	0.9412	regulation of peptidyl-lysine acetylation
2000748	1	0	0	0	1	1	1	0	0	0.9184	positive regulation of defecation rhythm
2000746	3	0	0	0	1	1	1	0	0	0.9976	regulation of defecation rhythm
2000738	1	0	0	0	1	1	1	0	0	0.9184	positive regulation of stem cell differentiation
2000736	1	0	0	0	1	1	1	0	0	0.9184	regulation of stem cell differentiation
2000678	1	0	0	0	1	1	1	0	0	0.9184	negative regulation of transcription regulatory region DNA binding
2000677	3	0	0	0	1	1	1	0	0	0.9976	regulation of transcription regulatory region DNA binding
2000637	1	0	0	0	1	1	1	0	0	0.9184	positive regulation of gene silencing by miRNA
2000636	1	0	0	0	1	1	1	0	0	0.9184	positive regulation of primary miRNA processing
2000635	1	0	0	0	1	1	1	0	0	0.9184	negative regulation of primary miRNA processing
2000634	2	0	0	0	1	1	1	0	0	0.9842	regulation of primary miRNA processing
2000601	1	0	0	0	1	1	1	0	0	0.9184	positive regulation of Arp2/3 complex-mediated actin nucleation
2000574	1	0	0	0	1	1	1	0	0	0.9184	regulation of microtubule motor activity
2000573	4	0	0	0	1	1	1	0	0	0.9412	positive regulation of DNA biosynthetic process
2000480	1	0	0	0	1	1	1	0	0	0.9184	negative regulation of cAMP-dependent protein kinase activity
2000479	1	0	0	0	1	1	1	0	0	0.9184	regulation of cAMP-dependent protein kinase activity
2000427	6	0	0	0	1	1	1	0	0	0.9891	positive regulation of apoptotic cell clearance
2000426	4	0	0	0	1	1	1	0	0	0.9412	negative regulation of apoptotic cell clearance
2000425	13	0	0	0	1	1	1	0	0	0.9605	regulation of apoptotic cell clearance
2000380	2	0	0	0	1	1	1	0	0	0.9842	regulation of mesoderm development
2000377	2	0	0	0	1	1	1	0	0	0.9842	regulation of reactive oxygen species metabolic process
2000370	1	0	0	0	1	1	1	0	0	0.9184	positive regulation of clathrin-mediated endocytosis
2000369	2	0	0	0	1	1	1	0	0	0.9842	regulation of clathrin-mediated endocytosis
2000331	2	0	0	0	1	1	1	0	0	0.9842	regulation of terminal button organization
2000312	1	0	0	0	1	1	1	0	0	0.9184	regulation of kainate selective glutamate receptor activity
2000311	5	0	0	0	1	1	1	0	0	0.9789	regulation of alpha-amino-3-hydroxy-5-methyl-4-isoxazole propionate selective glutamate receptor activity
2000310	1	0	0	0	1	1	1	0	0	0.9184	regulation of N-methyl-D-aspartate selective glutamate receptor activity
2000294	3	0	0	0	1	1	1	0	0	0.9976	positive regulation of defecation
2000292	6	0	0	0	1	1	1	0	0	0.9891	regulation of defecation
2000279	1	0	0	0	1	1	1	0	0	0.9184	negative regulation of DNA biosynthetic process
2000278	5	0	0	0	1	1	1	0	0	0.9789	regulation of DNA biosynthetic process
2000272	2	0	0	0	1	1	1	0	0	0.9842	negative regulation of receptor activity
2000253	3	0	0	0	1	1	1	0	0	0.9976	positive regulation of feeding behavior
2000249	1	0	0	0	1	1	1	0	0	0.9184	regulation of actin cytoskeleton reorganization
2000243	64	0	0	0	1	1	1	0	0	0.9637	positive regulation of reproductive process
2000193	1	0	0	0	1	1	1	0	0	0.9184	positive regulation of fatty acid transport
2000192	3	0	0	0	1	1	1	0	0	0.9976	negative regulation of fatty acid transport
2000191	4	0	0	0	1	1	1	0	0	0.9412	regulation of fatty acid transport
2000147	11	0	0	0	1	1	1	0	0	0.9526	positive regulation of cell motility
2000146	5	0	0	0	1	1	1	0	0	0.9789	negative regulation of cell motility
2000144	9	0	0	0	1	1	1	0	0	0.9942	positive regulation of DNA-templated transcription, initiation
2000142	9	0	0	0	1	1	1	0	0	0.9942	regulation of DNA-templated transcription, initiation
2000134	1	0	0	0	1	1	1	0	0	0.9184	negative regulation of G1/S transition of mitotic cell cycle
2000117	3	0	0	0	1	1	1	0	0	0.9976	negative regulation of cysteine-type endopeptidase activity
2000116	10	0	0	0	1	1	1	0	0	0.9884	regulation of cysteine-type endopeptidase activity
2000114	7	0	0	0	1	1	1	0	0	0.9979	regulation of establishment of cell polarity
2000113	155	0	0	0	1	1	1	0	0	0.9458	negative regulation of cellular macromolecule biosynthetic process
2000105	3	0	0	0	1	1	1	0	0	0.9976	positive regulation of DNA-dependent DNA replication
2000104	3	0	0	0	1	1	1	0	0	0.9976	negative regulation of DNA-dependent DNA replication
2000060	2	0	0	0	1	1	1	0	0	0.9842	positive regulation of protein ubiquitination involved in ubiquitin-dependent protein catabolic process
2000058	2	0	0	0	1	1	1	0	0	0.9842	regulation of protein ubiquitination involved in ubiquitin-dependent protein catabolic process
2000045	4	0	0	0	1	1	1	0	0	0.9412	regulation of G1/S transition of mitotic cell cycle
2000027	6	0	0	0	1	1	1	0	0	0.9891	regulation of organ morphogenesis
2000021	11	0	0	0	1	1	1	0	0	0.9526	regulation of ion homeostasis
2000010	2	0	0	0	1	1	1	0	0	0.9842	positive regulation of protein localization to cell surface
2000008	4	0	0	0	1	1	1	0	0	0.9412	regulation of protein localization to cell surface
2000002	3	0	0	0	1	1	1	0	0	0.9976	negative regulation of DNA damage checkpoint
2000001	3	0	0	0	1	1	1	0	0	0.9976	regulation of DNA damage checkpoint
1990778	39	0	0	0	1	1	1	0	0	0.9919	protein localization to cell periphery
1990748	38	0	0	0	1	1	1	0	0	0.779	cellular detoxification
1990569	1	0	0	0	1	1	1	0	0	0.9184	UDP-N-acetylglucosamine transmembrane transport
1990542	21	0	0	0	1	1	1	0	0	0.99	mitochondrial transmembrane transport
1990522	1	0	0	0	1	1	1	0	0	0.9184	tail spike morphogenesis
1990511	1	0	0	0	1	1	1	0	0	0.9184	piRNA biosynthetic process
1990504	5	0	0	0	1	1	1	0	0	0.9789	dense core granule exocytosis
1990502	5	0	0	0	1	1	1	0	0	0.9789	dense core granule maturation
1990481	1	0	0	0	1	1	1	0	0	0.9184	mRNA pseudouridine synthesis
1990466	1	0	0	0	1	1	1	0	0	0.9184	protein autosumoylation
1990440	1	0	0	0	1	1	1	0	0	0.9184	positive regulation of transcription from RNA polymerase II promoter in response to endoplasmic reticulum stress
1990426	1	0	0	0	1	1	1	0	0	0.9184	homologous recombination-dependent replication fork processing
1990386	1	0	0	0	1	1	1	0	0	0.9184	mitotic cleavage furrow ingression
1990359	2	0	0	0	1	1	1	0	0	0.9842	stress response to zinc ion
1990258	2	0	0	0	1	1	1	0	0	0.9842	histone glutamine methylation
1990182	1	0	0	0	1	1	1	0	0	0.9184	exosomal secretion
1990180	1	0	0	0	1	1	1	0	0	0.9184	mitochondrial tRNA 3'-end processing
1990179	1	0	0	0	1	1	1	0	0	0.9184	protein localization to actomyosin contractile ring
1990170	11	0	0	0	1	1	1	0	0	0.9526	stress response to cadmium ion
1990169	10	0	0	0	1	1	1	0	0	0.9884	stress response to copper ion
1990126	2	0	0	0	1	1	1	0	0	0.9842	retrograde transport, endosome to plasma membrane
1990074	1	0	0	0	1	1	1	0	0	0.9184	polyuridylation-dependent mRNA catabolic process
1990048	1	0	0	0	1	1	1	0	0	0.9184	anterograde dense core granule trafficking
1990035	5	0	0	0	1	1	1	0	0	0.9789	calcium ion import into cell
1990001	1	0	0	0	1	1	1	0	0	0.9184	inhibition of cysteine-type endopeptidase activity involved in apoptotic process
1990000	1	0	0	0	1	1	1	0	0	0.9184	amyloid fibril formation
1905155	8	0	0	0	1	1	1	0	0	0.9803	positive regulation of membrane invagination
1905154	7	0	0	0	1	1	1	0	0	0.9979	negative regulation of membrane invagination
1905153	17	0	0	0	1	1	1	0	0	0.9711	regulation of membrane invagination
1905145	7	0	0	0	1	1	1	0	0	0.9979	cellular response to acetylcholine
1905144	7	0	0	0	1	1	1	0	0	0.9979	response to acetylcholine
1905134	5	0	0	0	1	1	1	0	0	0.9789	positive regulation of meiotic chromosome separation
1905133	1	0	0	0	1	1	1	0	0	0.9184	negative regulation of meiotic chromosome separation
1905132	6	0	0	0	1	1	1	0	0	0.9891	regulation of meiotic chromosome separation
1905039	42	0	0	0	1	1	1	0	0	0.986	carboxylic acid transmembrane transport
1905037	27	0	0	0	1	1	1	0	0	0.971	autophagosome organization
1904951	7	0	0	0	1	1	1	0	0	0.9979	positive regulation of establishment of protein localization
1904950	7	0	0	0	1	1	1	0	0	0.9979	negative regulation of establishment of protein localization
1904893	1	0	0	0	1	1	1	0	0	0.9184	negative regulation of STAT cascade
1904892	1	0	0	0	1	1	1	0	0	0.9184	regulation of STAT cascade
1904811	2	0	0	0	1	1	1	0	0	0.9842	positive regulation of dense core granule transport
1904810	2	0	0	0	1	1	1	0	0	0.9842	negative regulation of dense core granule transport
1904809	4	0	0	0	1	1	1	0	0	0.9412	regulation of dense core granule transport
1904808	2	0	0	0	1	1	1	0	0	0.9842	positive regulation of protein oxidation
1904806	2	0	0	0	1	1	1	0	0	0.9842	regulation of protein oxidation
1904799	2	0	0	0	1	1	1	0	0	0.9842	regulation of neuron remodeling
1904787	2	0	0	0	1	1	1	0	0	0.9842	positive regulation of asymmetric protein localization involved in cell fate determination
1904785	2	0	0	0	1	1	1	0	0	0.9842	regulation of asymmetric protein localization involved in cell fate determination
1904781	3	0	0	0	1	1	1	0	0	0.9976	positive regulation of protein localization to centrosome
1904779	3	0	0	0	1	1	1	0	0	0.9976	regulation of protein localization to centrosome
1904776	2	0	0	0	1	1	1	0	0	0.9842	regulation of protein localization to cell cortex
1904748	3	0	0	0	1	1	1	0	0	0.9976	regulation of apoptotic process involved in development
1904746	2	0	0	0	1	1	1	0	0	0.9842	negative regulation of apoptotic process involved in development
1904668	1	0	0	0	1	1	1	0	0	0.9184	positive regulation of ubiquitin protein ligase activity
1904666	1	0	0	0	1	1	1	0	0	0.9184	regulation of ubiquitin protein ligase activity
1904659	4	0	0	0	1	1	1	0	0	0.9412	glucose transmembrane transport
1904618	2	0	0	0	1	1	1	0	0	0.9842	positive regulation of actin binding
1904616	2	0	0	0	1	1	1	0	0	0.9842	regulation of actin binding
1904590	6	0	0	0	1	1	1	0	0	0.9891	negative regulation of protein import
1904589	7	0	0	0	1	1	1	0	0	0.9979	regulation of protein import
1904587	5	0	0	0	1	1	1	0	0	0.9789	response to glycoprotein
1904576	3	0	0	0	1	1	1	0	0	0.9976	response to tunicamycin
1904531	2	0	0	0	1	1	1	0	0	0.9842	positive regulation of actin filament binding
1904529	2	0	0	0	1	1	1	0	0	0.9842	regulation of actin filament binding
1904508	3	0	0	0	1	1	1	0	0	0.9976	regulation of protein localization to basolateral plasma membrane
1904491	5	0	0	0	1	1	1	0	0	0.9789	protein localization to ciliary transition zone
1904427	1	0	0	0	1	1	1	0	0	0.9184	positive regulation of calcium ion transmembrane transport
1904398	1	0	0	0	1	1	1	0	0	0.9184	positive regulation of neuromuscular junction development
1904396	1	0	0	0	1	1	1	0	0	0.9184	regulation of neuromuscular junction development
1904375	5	0	0	0	1	1	1	0	0	0.9789	regulation of protein localization to cell periphery
1904357	3	0	0	0	1	1	1	0	0	0.9976	negative regulation of telomere maintenance via telomere lengthening
1904356	3	0	0	0	1	1	1	0	0	0.9976	regulation of telomere maintenance via telomere lengthening
1904333	4	0	0	0	1	1	1	0	0	0.9412	positive regulation of error-prone translesion synthesis
1904331	4	0	0	0	1	1	1	0	0	0.9412	regulation of error-prone translesion synthesis
1904294	1	0	0	0	1	1	1	0	0	0.9184	positive regulation of ERAD pathway
1904292	1	0	0	0	1	1	1	0	0	0.9184	regulation of ERAD pathway
1904290	3	0	0	0	1	1	1	0	0	0.9976	negative regulation of mitotic DNA damage checkpoint
1904289	3	0	0	0	1	1	1	0	0	0.9976	regulation of mitotic DNA damage checkpoint
1904247	1	0	0	0	1	1	1	0	0	0.9184	positive regulation of polynucleotide adenylyltransferase activity
1904245	1	0	0	0	1	1	1	0	0	0.9184	regulation of polynucleotide adenylyltransferase activity
1904123	1	0	0	0	1	1	1	0	0	0.9184	positive regulation of fatty acid beta-oxidation by serotonin receptor signaling pathway
1904122	1	0	0	0	1	1	1	0	0	0.9184	positive regulation of fatty acid beta-oxidation by octopamine signaling pathway
1904113	1	0	0	0	1	1	1	0	0	0.9184	negative regulation of muscle filament sliding
1904111	1	0	0	0	1	1	1	0	0	0.9184	negative regulation of plus-end directed microfilament motor activity
1904110	1	0	0	0	1	1	1	0	0	0.9184	regulation of plus-end directed microfilament motor activity
1904108	1	0	0	0	1	1	1	0	0	0.9184	protein localization to ciliary inversin compartment
1904107	3	0	0	0	1	1	1	0	0	0.9976	protein localization to microvillus membrane
1904106	3	0	0	0	1	1	1	0	0	0.9976	protein localization to microvillus
1904081	5	0	0	0	1	1	1	0	0	0.9789	positive regulation of transcription from RNA polymerase II promoter involved in neuron differentiation
1904080	1	0	0	0	1	1	1	0	0	0.9184	positive regulation of transcription from RNA polymerase II promoter involved in neuron fate specification
1904070	5	0	0	0	1	1	1	0	0	0.9789	ascaroside biosynthetic process
1904069	5	0	0	0	1	1	1	0	0	0.9789	ascaroside metabolic process
1904068	3	0	0	0	1	1	1	0	0	0.9976	G-protein coupled receptor signaling pathway involved in social behavior
1904066	2	0	0	0	1	1	1	0	0	0.9842	G-protein coupled receptor signaling pathway involved in dauer larval development
1904064	1	0	0	0	1	1	1	0	0	0.9184	positive regulation of cation transmembrane transport
1904063	2	0	0	0	1	1	1	0	0	0.9842	negative regulation of cation transmembrane transport
1904062	5	0	0	0	1	1	1	0	0	0.9789	regulation of cation transmembrane transport
1904031	6	0	0	0	1	1	1	0	0	0.9891	positive regulation of cyclin-dependent protein kinase activity
1904030	13	0	0	0	1	1	1	0	0	0.9605	negative regulation of cyclin-dependent protein kinase activity
1904029	24	0	0	0	1	1	1	0	0	0.999	regulation of cyclin-dependent protein kinase activity
1904000	2	0	0	0	1	1	1	0	0	0.9842	positive regulation of eating behavior
1903998	40	0	0	0	1	1	1	0	0	0.9709	regulation of eating behavior
1903959	9	0	0	0	1	1	1	0	0	0.9942	regulation of anion transmembrane transport
1903935	3	0	0	0	1	1	1	0	0	0.9976	response to sodium arsenite
1903864	3	0	0	0	1	1	1	0	0	0.9976	P granule disassembly
1903863	5	0	0	0	1	1	1	0	0	0.9789	P granule assembly
1903854	2	0	0	0	1	1	1	0	0	0.9842	negative regulation of stress response to copper ion
1903853	2	0	0	0	1	1	1	0	0	0.9842	regulation of stress response to copper ion
1903846	3	0	0	0	1	1	1	0	0	0.9976	positive regulation of cellular response to transforming growth factor beta stimulus
1903845	7	0	0	0	1	1	1	0	0	0.9979	negative regulation of cellular response to transforming growth factor beta stimulus
1903844	11	0	0	0	1	1	1	0	0	0.9526	regulation of cellular response to transforming growth factor beta stimulus
1903843	1	0	0	0	1	1	1	0	0	0.9184	cellular response to arsenite ion
1903842	1	0	0	0	1	1	1	0	0	0.9184	response to arsenite ion
1903831	7	0	0	0	1	1	1	0	0	0.9979	signal transduction involved in cellular response to ammonium ion
1903830	1	0	0	0	1	1	1	0	0	0.9184	magnesium ion transmembrane transport
1903829	11	0	0	0	1	1	1	0	0	0.9526	positive regulation of cellular protein localization
1903828	9	0	0	0	1	1	1	0	0	0.9942	negative regulation of cellular protein localization
1903827	30	0	0	0	1	1	1	0	0	0.988	regulation of cellular protein localization
1903826	1	0	0	0	1	1	1	0	0	0.9184	arginine transmembrane transport
1903825	43	0	0	0	1	1	1	0	0	0.9574	organic acid transmembrane transport
1903800	1	0	0	0	1	1	1	0	0	0.9184	positive regulation of production of miRNAs involved in gene silencing by miRNA
1903799	1	0	0	0	1	1	1	0	0	0.9184	negative regulation of production of miRNAs involved in gene silencing by miRNA
1903798	2	0	0	0	1	1	1	0	0	0.9842	regulation of production of miRNAs involved in gene silencing by miRNA
1903793	9	0	0	0	1	1	1	0	0	0.9942	positive regulation of anion transport
1903792	3	0	0	0	1	1	1	0	0	0.9976	negative regulation of anion transport
1903746	2	0	0	0	1	1	1	0	0	0.9842	positive regulation of pharyngeal pumping
1903743	1	0	0	0	1	1	1	0	0	0.9184	negative regulation of anterograde synaptic vesicle transport
1903729	3	0	0	0	1	1	1	0	0	0.9976	regulation of plasma membrane organization
1903727	1	0	0	0	1	1	1	0	0	0.9184	positive regulation of phospholipid metabolic process
1903726	1	0	0	0	1	1	1	0	0	0.9184	negative regulation of phospholipid metabolic process
1903725	3	0	0	0	1	1	1	0	0	0.9976	regulation of phospholipid metabolic process
1903673	1	0	0	0	1	1	1	0	0	0.9184	mitotic cleavage furrow formation
1903650	9	0	0	0	1	1	1	0	0	0.9942	negative regulation of cytoplasmic transport
1903616	7	0	0	0	1	1	1	0	0	0.9979	MAPK cascade involved in axon regeneration
1903578	2	0	0	0	1	1	1	0	0	0.9842	regulation of ATP metabolic process
1903554	2	0	0	0	1	1	1	0	0	0.9842	G-protein coupled receptor signaling pathway involved in defense response to Gram-negative bacterium
1903539	6	0	0	0	1	1	1	0	0	0.9891	protein localization to postsynaptic membrane
1903533	7	0	0	0	1	1	1	0	0	0.9979	regulation of protein targeting
1903532	16	0	0	0	1	1	1	0	0	0.9475	positive regulation of secretion by cell
1903531	3	0	0	0	1	1	1	0	0	0.9976	negative regulation of secretion by cell
1903530	31	0	0	0	1	1	1	0	0	0.9621	regulation of secretion by cell
1903524	1	0	0	0	1	1	1	0	0	0.9184	positive regulation of blood circulation
1903522	1	0	0	0	1	1	1	0	0	0.9184	regulation of blood circulation
1903513	3	0	0	0	1	1	1	0	0	0.9976	endoplasmic reticulum to cytosol transport
1903510	13	0	0	0	1	1	1	0	0	0.9605	mucopolysaccharide metabolic process
1903509	32	0	0	0	1	1	1	0	0	0.9966	liposaccharide metabolic process
1903507	105	0	0	0	1	1	1	0	0	0.9644	negative regulation of nucleic acid-templated transcription
1903490	1	0	0	0	1	1	1	0	0	0.9184	positive regulation of mitotic cytokinesis
1903461	2	0	0	0	1	1	1	0	0	0.9842	Okazaki fragment processing involved in mitotic DNA replication
1903441	8	0	0	0	1	1	1	0	0	0.9803	protein localization to ciliary membrane
1903438	1	0	0	0	1	1	1	0	0	0.9184	positive regulation of mitotic cytokinetic process
1903436	1	0	0	0	1	1	1	0	0	0.9184	regulation of mitotic cytokinetic process
1903431	3	0	0	0	1	1	1	0	0	0.9976	positive regulation of cell maturation
1903430	6	0	0	0	1	1	1	0	0	0.9891	negative regulation of cell maturation
1903429	11	0	0	0	1	1	1	0	0	0.9526	regulation of cell maturation
1903423	1	0	0	0	1	1	1	0	0	0.9184	positive regulation of synaptic vesicle recycling
1903421	1	0	0	0	1	1	1	0	0	0.9184	regulation of synaptic vesicle recycling
1903401	1	0	0	0	1	1	1	0	0	0.9184	L-lysine transmembrane transport
1903364	31	0	0	0	1	1	1	0	0	0.9621	positive regulation of cellular protein catabolic process
1903363	9	0	0	0	1	1	1	0	0	0.9942	negative regulation of cellular protein catabolic process
1903362	41	0	0	0	1	1	1	0	0	0.9913	regulation of cellular protein catabolic process
1903361	10	0	0	0	1	1	1	0	0	0.9884	protein localization to basolateral plasma membrane
1903355	1	0	0	0	1	1	1	0	0	0.9184	negative regulation of distal tip cell migration
1903354	1	0	0	0	1	1	1	0	0	0.9184	regulation of distal tip cell migration
1903322	8	0	0	0	1	1	1	0	0	0.9803	positive regulation of protein modification by small protein conjugation or removal
1903320	16	0	0	0	1	1	1	0	0	0.9475	regulation of protein modification by small protein conjugation or removal
1903319	1	0	0	0	1	1	1	0	0	0.9184	positive regulation of protein maturation
1903318	1	0	0	0	1	1	1	0	0	0.9184	negative regulation of protein maturation
1903317	2	0	0	0	1	1	1	0	0	0.9842	regulation of protein maturation
1903313	2	0	0	0	1	1	1	0	0	0.9842	positive regulation of mRNA metabolic process
1903312	1	0	0	0	1	1	1	0	0	0.9184	negative regulation of mRNA metabolic process
1903311	18	0	0	0	1	1	1	0	0	0.964	regulation of mRNA metabolic process
1903310	5	0	0	0	1	1	1	0	0	0.9789	positive regulation of chromatin modification
1903309	3	0	0	0	1	1	1	0	0	0.9976	negative regulation of chromatin modification
1903308	11	0	0	0	1	1	1	0	0	0.9526	regulation of chromatin modification
1903241	1	0	0	0	1	1	1	0	0	0.9184	U2-type prespliceosome assembly
1903201	3	0	0	0	1	1	1	0	0	0.9976	regulation of oxidative stress-induced cell death
1903190	2	0	0	0	1	1	1	0	0	0.9842	glyoxal catabolic process
1903189	2	0	0	0	1	1	1	0	0	0.9842	glyoxal metabolic process
1903169	3	0	0	0	1	1	1	0	0	0.9976	regulation of calcium ion transmembrane transport
1903119	1	0	0	0	1	1	1	0	0	0.9184	protein localization to actin cytoskeleton
1903115	1	0	0	0	1	1	1	0	0	0.9184	regulation of actin filament-based movement
1903104	1	0	0	0	1	1	1	0	0	0.9184	regulation of insulin receptor signaling pathway involved in determination of adult lifespan
1903076	3	0	0	0	1	1	1	0	0	0.9976	regulation of protein localization to plasma membrane
1903052	29	0	0	0	1	1	1	0	0	0.9879	positive regulation of proteolysis involved in cellular protein catabolic process
1903051	7	0	0	0	1	1	1	0	0	0.9979	negative regulation of proteolysis involved in cellular protein catabolic process
1903050	37	0	0	0	1	1	1	0	0	0.9925	regulation of proteolysis involved in cellular protein catabolic process
1903036	3	0	0	0	1	1	1	0	0	0.9976	positive regulation of response to wounding
1903035	5	0	0	0	1	1	1	0	0	0.9789	negative regulation of response to wounding
1903034	8	0	0	0	1	1	1	0	0	0.9803	regulation of response to wounding
1903026	1	0	0	0	1	1	1	0	0	0.9184	negative regulation of RNA polymerase II regulatory region sequence-specific DNA binding
1903025	1	0	0	0	1	1	1	0	0	0.9184	regulation of RNA polymerase II regulatory region sequence-specific DNA binding
1903020	1	0	0	0	1	1	1	0	0	0.9184	positive regulation of glycoprotein metabolic process
1903019	1	0	0	0	1	1	1	0	0	0.9184	negative regulation of glycoprotein metabolic process
1903018	2	0	0	0	1	1	1	0	0	0.9842	regulation of glycoprotein metabolic process
1903008	28	0	0	0	1	1	1	0	0	0.9978	organelle disassembly
1903003	2	0	0	0	1	1	1	0	0	0.9842	positive regulation of protein deubiquitination
1902983	1	0	0	0	1	1	1	0	0	0.9184	DNA strand elongation involved in mitotic DNA replication
1902977	1	0	0	0	1	1	1	0	0	0.9184	mitotic DNA replication preinitiation complex assembly
1902975	1	0	0	0	1	1	1	0	0	0.9184	mitotic DNA replication initiation
1902969	5	0	0	0	1	1	1	0	0	0.9789	mitotic DNA replication
1902946	1	0	0	0	1	1	1	0	0	0.9184	protein localization to early endosome
1902894	1	0	0	0	1	1	1	0	0	0.9184	negative regulation of pri-miRNA transcription from RNA polymerase II promoter
1902893	1	0	0	0	1	1	1	0	0	0.9184	regulation of pri-miRNA transcription from RNA polymerase II promoter
1902884	1	0	0	0	1	1	1	0	0	0.9184	positive regulation of response to oxidative stress
1902882	6	0	0	0	1	1	1	0	0	0.9891	regulation of response to oxidative stress
1902855	3	0	0	0	1	1	1	0	0	0.9976	regulation of nonmotile primary cilium assembly
1902850	13	0	0	0	1	1	1	0	0	0.9605	microtubule cytoskeleton organization involved in mitosis
1902845	1	0	0	0	1	1	1	0	0	0.9184	negative regulation of mitotic spindle elongation
1902842	1	0	0	0	1	1	1	0	0	0.9184	negative regulation of netrin-activated signaling pathway
1902841	1	0	0	0	1	1	1	0	0	0.9184	regulation of netrin-activated signaling pathway
1902808	2	0	0	0	1	1	1	0	0	0.9842	positive regulation of cell cycle G1/S phase transition
1902807	2	0	0	0	1	1	1	0	0	0.9842	negative regulation of cell cycle G1/S phase transition
1902806	7	0	0	0	1	1	1	0	0	0.9979	regulation of cell cycle G1/S phase transition
1902804	1	0	0	0	1	1	1	0	0	0.9184	negative regulation of synaptic vesicle transport
1902750	5	0	0	0	1	1	1	0	0	0.9789	negative regulation of cell cycle G2/M phase transition
1902749	6	0	0	0	1	1	1	0	0	0.9891	regulation of cell cycle G2/M phase transition
1902743	2	0	0	0	1	1	1	0	0	0.9842	regulation of lamellipodium organization
1902742	8	0	0	0	1	1	1	0	0	0.9803	apoptotic process involved in development
1902686	2	0	0	0	1	1	1	0	0	0.9842	mitochondrial outer membrane permeabilization involved in programmed cell death
1902685	1	0	0	0	1	1	1	0	0	0.9184	positive regulation of receptor localization to synapse
1902684	1	0	0	0	1	1	1	0	0	0.9184	negative regulation of receptor localization to synapse
1902683	3	0	0	0	1	1	1	0	0	0.9976	regulation of receptor localization to synapse
1902679	105	0	0	0	1	1	1	0	0	0.9644	negative regulation of RNA biosynthetic process
1902656	5	0	0	0	1	1	1	0	0	0.9789	calcium ion import into cytosol
1902653	1	0	0	0	1	1	1	0	0	0.9184	secondary alcohol biosynthetic process
1902652	9	0	0	0	1	1	1	0	0	0.9942	secondary alcohol metabolic process
1902634	1	0	0	0	1	1	1	0	0	0.9184	1-phosphatidyl-1D-myo-inositol 4,5-bisphosphate catabolic process
1902633	1	0	0	0	1	1	1	0	0	0.9184	1-phosphatidyl-1D-myo-inositol 4,5-bisphosphate metabolic process
1902626	2	0	0	0	1	1	1	0	0	0.9842	assembly of large subunit precursor of preribosome
1902617	1	0	0	0	1	1	1	0	0	0.9184	response to fluoride
1902603	6	0	0	0	1	1	1	0	0	0.9891	carnitine transmembrane transport
1902600	71	0	0	0	1	1	1	0	0	0.9708	hydrogen ion transmembrane transport
1902593	26	0	0	0	1	1	1	0	0	0.97	single-organism nuclear import
1902591	3	0	0	0	1	1	1	0	0	0.9976	single-organism membrane budding
1902559	2	0	0	0	1	1	1	0	0	0.9842	3'-phospho-5'-adenylyl sulfate transmembrane transport
1902534	2	0	0	0	1	1	1	0	0	0.9842	single-organism membrane invagination
1902532	52	0	0	0	1	1	1	0	0	0.9447	negative regulation of intracellular signal transduction
1902476	80	0	0	0	1	1	1	0	0	0.9559	chloride transmembrane transport
1902475	18	0	0	0	1	1	1	0	0	0.964	L-alpha-amino acid transmembrane transport
1902474	6	0	0	0	1	1	1	0	0	0.9891	positive regulation of protein localization to synapse
1902473	11	0	0	0	1	1	1	0	0	0.9526	regulation of protein localization to synapse
1902463	1	0	0	0	1	1	1	0	0	0.9184	protein localization to cell leading edge
1902436	7	0	0	0	1	1	1	0	0	0.9979	negative regulation of male mating behavior
1902435	8	0	0	0	1	1	1	0	0	0.9803	regulation of male mating behavior
1902423	2	0	0	0	1	1	1	0	0	0.9842	regulation of mitotic attachment of spindle microtubules to kinetochore
1902412	1	0	0	0	1	1	1	0	0	0.9184	regulation of mitotic cytokinesis
1902410	3	0	0	0	1	1	1	0	0	0.9976	mitotic cytokinetic process
1902358	8	0	0	0	1	1	1	0	0	0.9803	sulfate transmembrane transport
1902319	1	0	0	0	1	1	1	0	0	0.9184	DNA strand elongation involved in nuclear cell cycle DNA replication
1902315	1	0	0	0	1	1	1	0	0	0.9184	nuclear cell cycle DNA replication initiation
1902299	1	0	0	0	1	1	1	0	0	0.9184	pre-replicative complex assembly involved in cell cycle DNA replication
1902296	1	0	0	0	1	1	1	0	0	0.9184	DNA strand elongation involved in cell cycle DNA replication
1902292	1	0	0	0	1	1	1	0	0	0.9184	cell cycle DNA replication initiation
1902287	2	0	0	0	1	1	1	0	0	0.9842	semaphorin-plexin signaling pathway involved in axon guidance
1902285	2	0	0	0	1	1	1	0	0	0.9842	semaphorin-plexin signaling pathway involved in neuron projection guidance
1902275	11	0	0	0	1	1	1	0	0	0.9526	regulation of chromatin organization
1902255	1	0	0	0	1	1	1	0	0	0.9184	positive regulation of intrinsic apoptotic signaling pathway by p53 class mediator
1902253	1	0	0	0	1	1	1	0	0	0.9184	regulation of intrinsic apoptotic signaling pathway by p53 class mediator
1902230	4	0	0	0	1	1	1	0	0	0.9412	negative regulation of intrinsic apoptotic signaling pathway in response to DNA damage
1902229	4	0	0	0	1	1	1	0	0	0.9412	regulation of intrinsic apoptotic signaling pathway in response to DNA damage
1902224	1	0	0	0	1	1	1	0	0	0.9184	ketone body metabolic process
1902222	4	0	0	0	1	1	1	0	0	0.9412	erythrose 4-phosphate/phosphoenolpyruvate family amino acid catabolic process
1902221	4	0	0	0	1	1	1	0	0	0.9412	erythrose 4-phosphate/phosphoenolpyruvate family amino acid metabolic process
1902175	3	0	0	0	1	1	1	0	0	0.9976	regulation of oxidative stress-induced intrinsic apoptotic signaling pathway
1902160	2	0	0	0	1	1	1	0	0	0.9842	negative regulation of cyclic nucleotide-gated ion channel activity
1902159	2	0	0	0	1	1	1	0	0	0.9842	regulation of cyclic nucleotide-gated ion channel activity
1902117	3	0	0	0	1	1	1	0	0	0.9976	positive regulation of organelle assembly
1902116	2	0	0	0	1	1	1	0	0	0.9842	negative regulation of organelle assembly
1902115	13	0	0	0	1	1	1	0	0	0.9605	regulation of organelle assembly
1902110	2	0	0	0	1	1	1	0	0	0.9842	positive regulation of mitochondrial membrane permeability involved in apoptotic process
1902108	2	0	0	0	1	1	1	0	0	0.9842	regulation of mitochondrial membrane permeability involved in apoptotic process
1902104	5	0	0	0	1	1	1	0	0	0.9789	positive regulation of metaphase/anaphase transition of meiotic cell cycle
1902103	1	0	0	0	1	1	1	0	0	0.9184	negative regulation of metaphase/anaphase transition of meiotic cell cycle
1902102	6	0	0	0	1	1	1	0	0	0.9891	regulation of metaphase/anaphase transition of meiotic cell cycle
1902101	7	0	0	0	1	1	1	0	0	0.9979	positive regulation of metaphase/anaphase transition of cell cycle
1902100	7	0	0	0	1	1	1	0	0	0.9979	negative regulation of metaphase/anaphase transition of cell cycle
1902099	16	0	0	0	1	1	1	0	0	0.9475	regulation of metaphase/anaphase transition of cell cycle
1902093	2	0	0	0	1	1	1	0	0	0.9842	positive regulation of sperm motility
1902074	3	0	0	0	1	1	1	0	0	0.9976	response to salt
1902064	1	0	0	0	1	1	1	0	0	0.9184	regulation of transcription from RNA polymerase II promoter involved in spermatogenesis
1902022	1	0	0	0	1	1	1	0	0	0.9184	L-lysine transport
1902019	1	0	0	0	1	1	1	0	0	0.9184	regulation of cilium-dependent cell motility
1902017	3	0	0	0	1	1	1	0	0	0.9976	regulation of cilium assembly
1902001	1	0	0	0	1	1	1	0	0	0.9184	fatty acid transmembrane transport
1901998	1	0	0	0	1	1	1	0	0	0.9184	toxin transport
1901995	5	0	0	0	1	1	1	0	0	0.9789	positive regulation of meiotic cell cycle phase transition
1901994	1	0	0	0	1	1	1	0	0	0.9184	negative regulation of meiotic cell cycle phase transition
1901993	6	0	0	0	1	1	1	0	0	0.9891	regulation of meiotic cell cycle phase transition
1901992	6	0	0	0	1	1	1	0	0	0.9891	positive regulation of mitotic cell cycle phase transition
1901991	13	0	0	0	1	1	1	0	0	0.9605	negative regulation of mitotic cell cycle phase transition
1901990	24	0	0	0	1	1	1	0	0	0.999	regulation of mitotic cell cycle phase transition
1901989	11	0	0	0	1	1	1	0	0	0.9526	positive regulation of cell cycle phase transition
1901988	15	0	0	0	1	1	1	0	0	0.922	negative regulation of cell cycle phase transition
1901987	33	0	0	0	1	1	1	0	0	0.9857	regulation of cell cycle phase transition
1901985	3	0	0	0	1	1	1	0	0	0.9976	positive regulation of protein acetylation
1901984	2	0	0	0	1	1	1	0	0	0.9842	negative regulation of protein acetylation
1901983	4	0	0	0	1	1	1	0	0	0.9412	regulation of protein acetylation
1901977	3	0	0	0	1	1	1	0	0	0.9976	negative regulation of cell cycle checkpoint
1901976	3	0	0	0	1	1	1	0	0	0.9976	regulation of cell cycle checkpoint
1901970	4	0	0	0	1	1	1	0	0	0.9412	positive regulation of mitotic sister chromatid separation
1901950	4	0	0	0	1	1	1	0	0	0.9412	dense core granule transport
1901893	1	0	0	0	1	1	1	0	0	0.9184	positive regulation of cell septum assembly
1901891	1	0	0	0	1	1	1	0	0	0.9184	regulation of cell septum assembly
1901881	2	0	0	0	1	1	1	0	0	0.9842	positive regulation of protein depolymerization
1901880	11	0	0	0	1	1	1	0	0	0.9526	negative regulation of protein depolymerization
1901879	13	0	0	0	1	1	1	0	0	0.9605	regulation of protein depolymerization
1901857	1	0	0	0	1	1	1	0	0	0.9184	positive regulation of cellular respiration
1901800	27	0	0	0	1	1	1	0	0	0.971	positive regulation of proteasomal protein catabolic process
1901799	7	0	0	0	1	1	1	0	0	0.9979	negative regulation of proteasomal protein catabolic process
1901798	1	0	0	0	1	1	1	0	0	0.9184	positive regulation of signal transduction by p53 class mediator
1901797	10	0	0	0	1	1	1	0	0	0.9884	negative regulation of signal transduction by p53 class mediator
1901796	11	0	0	0	1	1	1	0	0	0.9526	regulation of signal transduction by p53 class mediator
1901741	1	0	0	0	1	1	1	0	0	0.9184	positive regulation of myoblast fusion
1901739	1	0	0	0	1	1	1	0	0	0.9184	regulation of myoblast fusion
1901701	39	0	0	0	1	1	1	0	0	0.9919	cellular response to oxygen-containing compound
1901700	76	0	0	0	1	1	1	0	0	0.9259	response to oxygen-containing compound
1901699	49	0	0	0	1	1	1	0	0	0.9861	cellular response to nitrogen compound
1901698	69	0	0	0	1	1	1	0	0	1	response to nitrogen compound
1901679	4	0	0	0	1	1	1	0	0	0.9412	nucleotide transmembrane transport
1901678	5	0	0	0	1	1	1	0	0	0.9789	iron coordination entity transport
1901663	9	0	0	0	1	1	1	0	0	0.9942	quinone biosynthetic process
1901661	9	0	0	0	1	1	1	0	0	0.9942	quinone metabolic process
1901659	69	0	0	0	1	1	1	0	0	1	glycosyl compound biosynthetic process
1901658	13	0	0	0	1	1	1	0	0	0.9605	glycosyl compound catabolic process
1901657	160	0	0	0	1	1	1	0	0	0.775	glycosyl compound metabolic process
1901655	2	0	0	0	1	1	1	0	0	0.9842	cellular response to ketone
1901654	2	0	0	0	1	1	1	0	0	0.9842	response to ketone
1901653	19	0	0	0	1	1	1	0	0	0.9669	cellular response to peptide
1901652	21	0	0	0	1	1	1	0	0	0.99	response to peptide
1901642	11	0	0	0	1	1	1	0	0	0.9526	nucleoside transmembrane transport
1901617	38	0	0	0	1	1	1	0	0	0.779	organic hydroxy compound biosynthetic process
1901616	12	0	0	0	1	1	1	0	0	0.9974	organic hydroxy compound catabolic process
1901615	70	0	0	0	1	1	1	0	0	0.9642	organic hydroxy compound metabolic process
1901609	1	0	0	0	1	1	1	0	0	0.9184	negative regulation of vesicle transport along microtubule
1901607	58	0	0	0	1	1	1	0	0	0.9705	alpha-amino acid biosynthetic process
1901606	34	0	0	0	1	1	1	0	0	0.9549	alpha-amino acid catabolic process
1901570	2	0	0	0	1	1	1	0	0	0.9842	fatty acid derivative biosynthetic process
1901568	2	0	0	0	1	1	1	0	0	0.9842	fatty acid derivative metabolic process
1901565	133	0	0	0	1	1	1	0	0	0.9739	organonitrogen compound catabolic process
1901562	1	0	0	0	1	1	1	0	0	0.9184	response to paraquat
1901561	1	0	0	0	1	1	1	0	0	0.9184	response to benomyl
1901522	4	0	0	0	1	1	1	0	0	0.9412	positive regulation of transcription from RNA polymerase II promoter involved in cellular response to chemical stimulus
1901503	1	0	0	0	1	1	1	0	0	0.9184	ether biosynthetic process
1901409	6	0	0	0	1	1	1	0	0	0.9891	positive regulation of phosphorylation of RNA polymerase II C-terminal domain
1901407	6	0	0	0	1	1	1	0	0	0.9891	regulation of phosphorylation of RNA polymerase II C-terminal domain
1901385	2	0	0	0	1	1	1	0	0	0.9842	regulation of voltage-gated calcium channel activity
1901374	17	0	0	0	1	1	1	0	0	0.9711	acetate ester transport
1901361	118	0	0	0	1	1	1	0	0	0.9976	organic cyclic compound catabolic process
1901341	1	0	0	0	1	1	1	0	0	0.9184	positive regulation of store-operated calcium channel activity
1901339	1	0	0	0	1	1	1	0	0	0.9184	regulation of store-operated calcium channel activity
1901337	1	0	0	0	1	1	1	0	0	0.9184	thioester transport
1901317	2	0	0	0	1	1	1	0	0	0.9842	regulation of sperm motility
1901292	15	0	0	0	1	1	1	0	0	0.922	nucleoside phosphate catabolic process
1901264	19	0	0	0	1	1	1	0	0	0.9669	carbohydrate derivative transport
1901255	1	0	0	0	1	1	1	0	0	0.9184	nucleotide-excision repair involved in interstrand cross-link repair
1901244	1	0	0	0	1	1	1	0	0	0.9184	positive regulation of transcription from RNA polymerase II promoter involved in defense response to fungus
1901216	1	0	0	0	1	1	1	0	0	0.9184	positive regulation of neuron death
1901215	5	0	0	0	1	1	1	0	0	0.9789	negative regulation of neuron death
1901214	8	0	0	0	1	1	1	0	0	0.9803	regulation of neuron death
1901190	1	0	0	0	1	1	1	0	0	0.9184	regulation of formation of translation initiation ternary complex
1901186	1	0	0	0	1	1	1	0	0	0.9184	positive regulation of ERBB signaling pathway
1901185	3	0	0	0	1	1	1	0	0	0.9976	negative regulation of ERBB signaling pathway
1901184	6	0	0	0	1	1	1	0	0	0.9891	regulation of ERBB signaling pathway
1901162	2	0	0	0	1	1	1	0	0	0.9842	primary amino compound biosynthetic process
1901160	2	0	0	0	1	1	1	0	0	0.9842	primary amino compound metabolic process
1901142	2	0	0	0	1	1	1	0	0	0.9842	insulin metabolic process
1901136	98	0	0	0	1	1	1	0	0	0.9707	carbohydrate derivative catabolic process
1901076	6	0	0	0	1	1	1	0	0	0.9891	positive regulation of engulfment of apoptotic cell
1901075	4	0	0	0	1	1	1	0	0	0.9412	negative regulation of engulfment of apoptotic cell
1901074	13	0	0	0	1	1	1	0	0	0.9605	regulation of engulfment of apoptotic cell
1901072	41	0	0	0	1	1	1	0	0	0.9913	glucosamine-containing compound catabolic process
1901071	54	0	0	0	1	1	1	0	0	0.9922	glucosamine-containing compound metabolic process
1901070	5	0	0	0	1	1	1	0	0	0.9789	guanosine-containing compound biosynthetic process
1901069	2	0	0	0	1	1	1	0	0	0.9842	guanosine-containing compound catabolic process
1901068	23	0	0	0	1	1	1	0	0	0.9551	guanosine-containing compound metabolic process
1901047	2	0	0	0	1	1	1	0	0	0.9842	insulin receptor signaling pathway involved in determination of adult lifespan
1901046	5	0	0	0	1	1	1	0	0	0.9789	positive regulation of oviposition
1901031	2	0	0	0	1	1	1	0	0	0.9842	regulation of response to reactive oxygen species
1901021	1	0	0	0	1	1	1	0	0	0.9184	positive regulation of calcium ion transmembrane transporter activity
1901019	3	0	0	0	1	1	1	0	0	0.9976	regulation of calcium ion transmembrane transporter activity
1901006	1	0	0	0	1	1	1	0	0	0.9184	ubiquinone-6 biosynthetic process
1901004	1	0	0	0	1	1	1	0	0	0.9184	ubiquinone-6 metabolic process
1900864	1	0	0	0	1	1	1	0	0	0.9184	mitochondrial RNA modification
1900620	2	0	0	0	1	1	1	0	0	0.9842	acetate ester biosynthetic process
1900619	5	0	0	0	1	1	1	0	0	0.9789	acetate ester metabolic process
1900544	3	0	0	0	1	1	1	0	0	0.9976	positive regulation of purine nucleotide metabolic process
1900543	1	0	0	0	1	1	1	0	0	0.9184	negative regulation of purine nucleotide metabolic process
1900542	6	0	0	0	1	1	1	0	0	0.9891	regulation of purine nucleotide metabolic process
1900449	6	0	0	0	1	1	1	0	0	0.9891	regulation of glutamate receptor signaling pathway
1900426	3	0	0	0	1	1	1	0	0	0.9976	positive regulation of defense response to bacterium
1900425	2	0	0	0	1	1	1	0	0	0.9842	negative regulation of defense response to bacterium
1900424	5	0	0	0	1	1	1	0	0	0.9789	regulation of defense response to bacterium
1900409	1	0	0	0	1	1	1	0	0	0.9184	positive regulation of cellular response to oxidative stress
1900407	4	0	0	0	1	1	1	0	0	0.9412	regulation of cellular response to oxidative stress
1900373	3	0	0	0	1	1	1	0	0	0.9976	positive regulation of purine nucleotide biosynthetic process
1900372	1	0	0	0	1	1	1	0	0	0.9184	negative regulation of purine nucleotide biosynthetic process
1900371	4	0	0	0	1	1	1	0	0	0.9412	regulation of purine nucleotide biosynthetic process
1900369	2	0	0	0	1	1	1	0	0	0.9842	negative regulation of RNA interference
1900368	3	0	0	0	1	1	1	0	0	0.9976	regulation of RNA interference
1900364	1	0	0	0	1	1	1	0	0	0.9184	negative regulation of mRNA polyadenylation
1900363	1	0	0	0	1	1	1	0	0	0.9184	regulation of mRNA polyadenylation
1900261	1	0	0	0	1	1	1	0	0	0.9184	positive regulation of RNA-directed RNA polymerase activity
1900259	1	0	0	0	1	1	1	0	0	0.9184	regulation of RNA-directed RNA polymerase activity
1900244	1	0	0	0	1	1	1	0	0	0.9184	positive regulation of synaptic vesicle endocytosis
1900242	1	0	0	0	1	1	1	0	0	0.9184	regulation of synaptic vesicle endocytosis
1900195	3	0	0	0	1	1	1	0	0	0.9976	positive regulation of oocyte maturation
1900194	6	0	0	0	1	1	1	0	0	0.9891	negative regulation of oocyte maturation
1900193	9	0	0	0	1	1	1	0	0	0.9942	regulation of oocyte maturation
1900182	4	0	0	0	1	1	1	0	0	0.9412	positive regulation of protein localization to nucleus
1900181	9	0	0	0	1	1	1	0	0	0.9942	negative regulation of protein localization to nucleus
1900180	12	0	0	0	1	1	1	0	0	0.9974	regulation of protein localization to nucleus
1900153	2	0	0	0	1	1	1	0	0	0.9842	positive regulation of nuclear-transcribed mRNA catabolic process, deadenylation-dependent decay
1900151	2	0	0	0	1	1	1	0	0	0.9842	regulation of nuclear-transcribed mRNA catabolic process, deadenylation-dependent decay
1900150	2	0	0	0	1	1	1	0	0	0.9842	regulation of defense response to fungus
1900119	1	0	0	0	1	1	1	0	0	0.9184	positive regulation of execution phase of apoptosis
1900117	1	0	0	0	1	1	1	0	0	0.9184	regulation of execution phase of apoptosis
1900101	3	0	0	0	1	1	1	0	0	0.9976	regulation of endoplasmic reticulum unfolded protein response
1900087	2	0	0	0	1	1	1	0	0	0.9842	positive regulation of G1/S transition of mitotic cell cycle
1900077	2	0	0	0	1	1	1	0	0	0.9842	negative regulation of cellular response to insulin stimulus
1900076	7	0	0	0	1	1	1	0	0	0.9979	regulation of cellular response to insulin stimulus
1900073	1	0	0	0	1	1	1	0	0	0.9184	regulation of neuromuscular synaptic transmission
1900038	1	0	0	0	1	1	1	0	0	0.9184	negative regulation of cellular response to hypoxia
1900037	1	0	0	0	1	1	1	0	0	0.9184	regulation of cellular response to hypoxia
99643	39	0	0	0	1	1	1	0	0	0.9919	signal release from synapse
99601	6	0	0	0	1	1	1	0	0	0.9891	regulation of neurotransmitter receptor activity
99587	5	0	0	0	1	1	1	0	0	0.9789	inorganic ion import into cell
99531	40	0	0	0	1	1	1	0	0	0.9709	presynaptic process involved in synaptic transmission
99519	1	0	0	0	1	1	1	0	0	0.9184	dense core granule cytoskeletal trafficking
99515	1	0	0	0	1	1	1	0	0	0.9184	actin filament-based transport
99504	24	0	0	0	1	1	1	0	0	0.999	synaptic vesicle cycle
99500	5	0	0	0	1	1	1	0	0	0.9789	vesicle fusion to plasma membrane
98927	1	0	0	0	1	1	1	0	0	0.9184	vesicle-mediated transport between endosomal compartments
98926	7	0	0	0	1	1	1	0	0	0.9979	postsynaptic signal transduction
98900	2	0	0	0	1	1	1	0	0	0.9842	regulation of action potential
98869	38	0	0	0	1	1	1	0	0	0.779	cellular oxidant detoxification
98840	18	0	0	0	1	1	1	0	0	0.964	protein transport along microtubule
98822	1	0	0	0	1	1	1	0	0	0.9184	peptidyl-cysteine modification to L-cysteine persulfide
98810	2	0	0	0	1	1	1	0	0	0.9842	neurotransmitter reuptake
98795	2	0	0	0	1	1	1	0	0	0.9842	mRNA cleavage involved in gene silencing
98789	2	0	0	0	1	1	1	0	0	0.9842	pre-mRNA cleavage required for polyadenylation
98787	2	0	0	0	1	1	1	0	0	0.9842	mRNA cleavage involved in mRNA processing
98781	4	0	0	0	1	1	1	0	0	0.9412	ncRNA transcription
98771	96	0	0	0	1	1	1	0	0	0.9998	inorganic ion homeostasis
98763	4	0	0	0	1	1	1	0	0	0.9412	mitotic cell cycle phase
98754	41	0	0	0	1	1	1	0	0	0.9913	detoxification
98742	17	0	0	0	1	1	1	0	0	0.9711	cell-cell adhesion via plasma-membrane adhesion molecules
98739	5	0	0	0	1	1	1	0	0	0.9789	import across plasma membrane
98734	2	0	0	0	1	1	1	0	0	0.9842	macromolecule depalmitoylation
98732	16	0	0	0	1	1	1	0	0	0.9475	macromolecule deacylation
98727	2	0	0	0	1	1	1	0	0	0.9842	maintenance of cell number
98722	12	0	0	0	1	1	1	0	0	0.9974	asymmetric stem cell division
98703	5	0	0	0	1	1	1	0	0	0.9789	calcium ion import across plasma membrane
98661	89	0	0	0	1	1	1	0	0	0.9856	inorganic anion transmembrane transport
98659	5	0	0	0	1	1	1	0	0	0.9789	inorganic cation import into cell
98657	8	0	0	0	1	1	1	0	0	0.9803	import into cell
98656	145	0	0	0	1	1	1	0	0	0.9868	anion transmembrane transport
98609	33	0	0	0	1	1	1	0	0	0.9857	cell-cell adhesion
98602	18	0	0	0	1	1	1	0	0	0.964	single organism cell adhesion
98534	5	0	0	0	1	1	1	0	0	0.9789	centriole assembly
98532	1	0	0	0	1	1	1	0	0	0.9184	histone H3-K27 trimethylation
98507	1	0	0	0	1	1	1	0	0	0.9184	polynucleotide 5' dephosphorylation
98506	1	0	0	0	1	1	1	0	0	0.9184	polynucleotide 3' dephosphorylation
98504	1	0	0	0	1	1	1	0	0	0.9184	DNA 3' dephosphorylation involved in DNA repair
98503	1	0	0	0	1	1	1	0	0	0.9184	DNA 3' dephosphorylation
98502	1	0	0	0	1	1	1	0	0	0.9184	DNA dephosphorylation
98501	2	0	0	0	1	1	1	0	0	0.9842	polynucleotide dephosphorylation
97696	1	0	0	0	1	1	1	0	0	0.9184	STAT cascade
97628	2	0	0	0	1	1	1	0	0	0.9842	distal tip cell migration
97581	3	0	0	0	1	1	1	0	0	0.9976	lamellipodium organization
97576	5	0	0	0	1	1	1	0	0	0.9789	vacuole fusion
97553	5	0	0	0	1	1	1	0	0	0.9789	calcium ion transmembrane import into cytosol
97502	11	0	0	0	1	1	1	0	0	0.9526	mannosylation
97501	20	0	0	0	1	1	1	0	0	0.9286	stress response to metal ion
97500	7	0	0	0	1	1	1	0	0	0.9979	receptor localization to nonmotile primary cilium
97499	16	0	0	0	1	1	1	0	0	0.9475	protein localization to nonmotile primary cilium
97466	5	0	0	0	1	1	1	0	0	0.9789	glycoprotein ERAD pathway
97435	1	0	0	0	1	1	1	0	0	0.9184	fibril organization
97428	3	0	0	0	1	1	1	0	0	0.9976	protein maturation by iron-sulfur cluster transfer
97402	4	0	0	0	1	1	1	0	0	0.9412	neuroblast migration
97384	1	0	0	0	1	1	1	0	0	0.9184	cellular lipid biosynthetic process
97374	1	0	0	0	1	1	1	0	0	0.9184	sensory neuron axon guidance
97359	3	0	0	0	1	1	1	0	0	0.9976	UDP-glucosylation
97354	5	0	0	0	1	1	1	0	0	0.9789	prenylation
97352	3	0	0	0	1	1	1	0	0	0.9976	autophagosome maturation
97345	2	0	0	0	1	1	1	0	0	0.9842	mitochondrial outer membrane permeabilization
97341	1	0	0	0	1	1	1	0	0	0.9184	zymogen inhibition
97340	1	0	0	0	1	1	1	0	0	0.9184	inhibition of cysteine-type endopeptidase activity
97309	1	0	0	0	1	1	1	0	0	0.9184	cap1 mRNA methylation
97305	6	0	0	0	1	1	1	0	0	0.9891	response to alcohol
97264	2	0	0	0	1	1	1	0	0	0.9842	self proteolysis
97238	2	0	0	0	1	1	1	0	0	0.9842	cellular response to methylglyoxal
97237	1	0	0	0	1	1	1	0	0	0.9184	cellular response to toxic substance
97235	1	0	0	0	1	1	1	0	0	0.9184	positive regulation of fatty acid beta-oxidation by positive regulation of transcription from RNA polymerase II promoter
97202	2	0	0	0	1	1	1	0	0	0.9842	activation of cysteine-type endopeptidase activity
97194	20	0	0	0	1	1	1	0	0	0.9286	execution phase of apoptosis
97193	22	0	0	0	1	1	1	0	0	0.9234	intrinsic apoptotic signaling pathway
97192	1	0	0	0	1	1	1	0	0	0.9184	extrinsic apoptotic signaling pathway in absence of ligand
97191	1	0	0	0	1	1	1	0	0	0.9184	extrinsic apoptotic signaling pathway
97190	28	0	0	0	1	1	1	0	0	0.9978	apoptotic signaling pathway
97164	40	0	0	0	1	1	1	0	0	0.9709	ammonium ion metabolic process
97154	1	0	0	0	1	1	1	0	0	0.9184	GABAergic neuron differentiation
97120	9	0	0	0	1	1	1	0	0	0.9942	receptor localization to synapse
97056	2	0	0	0	1	1	1	0	0	0.9842	selenocysteinyl-tRNA(Sec) biosynthetic process
97053	1	0	0	0	1	1	1	0	0	0.9184	L-kynurenine catabolic process
97052	1	0	0	0	1	1	1	0	0	0.9184	L-kynurenine metabolic process
97036	1	0	0	0	1	1	1	0	0	0.9184	regulation of plasma membrane sterol distribution
97035	17	0	0	0	1	1	1	0	0	0.9711	regulation of membrane lipid distribution
97034	4	0	0	0	1	1	1	0	0	0.9412	mitochondrial respiratory chain complex IV biogenesis
97033	2	0	0	0	1	1	1	0	0	0.9842	mitochondrial respiratory chain complex III biogenesis
97031	3	0	0	0	1	1	1	0	0	0.9976	mitochondrial respiratory chain complex I biogenesis
95500	7	0	0	0	1	1	1	0	0	0.9979	acetylcholine receptor signaling pathway
93002	11	0	0	0	1	1	1	0	0	0.9526	response to nematicide
90662	24	0	0	0	1	1	1	0	0	0.999	ATP hydrolysis coupled transmembrane transport
90646	1	0	0	0	1	1	1	0	0	0.9184	mitochondrial tRNA processing
90630	3	0	0	0	1	1	1	0	0	0.9976	activation of GTPase activity
90598	83	0	0	0	1	1	1	0	0	0.9283	male anatomical structure morphogenesis
90597	2	0	0	0	1	1	1	0	0	0.9842	nematode male tail mating organ morphogenesis
90596	3	0	0	0	1	1	1	0	0	0.9976	sensory organ morphogenesis
90559	2	0	0	0	1	1	1	0	0	0.9842	regulation of membrane permeability
90529	1	0	0	0	1	1	1	0	0	0.9184	cell septum assembly
90527	1	0	0	0	1	1	1	0	0	0.9184	actin filament reorganization
90522	1	0	0	0	1	1	1	0	0	0.9184	vesicle tethering involved in exocytosis
90520	4	0	0	0	1	1	1	0	0	0.9412	sphingolipid mediated signaling pathway
90503	13	0	0	0	1	1	1	0	0	0.9605	RNA phosphodiester bond hydrolysis, exonucleolytic
90502	39	0	0	0	1	1	1	0	0	0.9919	RNA phosphodiester bond hydrolysis, endonucleolytic
90501	62	0	0	0	1	1	1	0	0	0.9929	RNA phosphodiester bond hydrolysis
90494	1	0	0	0	1	1	1	0	0	0.9184	dopamine uptake
90493	1	0	0	0	1	1	1	0	0	0.9184	catecholamine uptake
90481	2	0	0	0	1	1	1	0	0	0.9842	pyrimidine nucleotide-sugar transmembrane transport
90444	2	0	0	0	1	1	1	0	0	0.9842	regulation of nematode larval development, heterochronic
90435	1	0	0	0	1	1	1	0	0	0.9184	protein localization to nuclear envelope
90390	2	0	0	0	1	1	1	0	0	0.9842	phagosome acidification involved in apoptotic cell clearance
90389	4	0	0	0	1	1	1	0	0	0.9412	phagosome-lysosome fusion involved in apoptotic cell clearance
90387	8	0	0	0	1	1	1	0	0	0.9803	phagolysosome assembly involved in apoptotic cell clearance
90386	13	0	0	0	1	1	1	0	0	0.9605	phagosome maturation involved in apoptotic cell clearance
90385	5	0	0	0	1	1	1	0	0	0.9789	phagosome-lysosome fusion
90383	2	0	0	0	1	1	1	0	0	0.9842	phagosome acidification
90382	14	0	0	0	1	1	1	0	0	0.9565	phagosome maturation
90329	10	0	0	0	1	1	1	0	0	0.9884	regulation of DNA-dependent DNA replication
90328	2	0	0	0	1	1	1	0	0	0.9842	regulation of olfactory learning
90326	3	0	0	0	1	1	1	0	0	0.9976	positive regulation of locomotion involved in locomotory behavior
90325	10	0	0	0	1	1	1	0	0	0.9884	regulation of locomotion involved in locomotory behavior
90317	6	0	0	0	1	1	1	0	0	0.9891	negative regulation of intracellular protein transport
90316	2	0	0	0	1	1	1	0	0	0.9842	positive regulation of intracellular protein transport
90311	2	0	0	0	1	1	1	0	0	0.9842	regulation of protein deacetylation
90307	13	0	0	0	1	1	1	0	0	0.9605	mitotic spindle assembly
90306	2	0	0	0	1	1	1	0	0	0.9842	spindle assembly involved in meiosis
90305	120	0	0	0	1	1	1	0	0	0.986	nucleic acid phosphodiester bond hydrolysis
90288	9	0	0	0	1	1	1	0	0	0.9942	negative regulation of cellular response to growth factor stimulus
90287	16	0	0	0	1	1	1	0	0	0.9475	regulation of cellular response to growth factor stimulus
90278	1	0	0	0	1	1	1	0	0	0.9184	negative regulation of peptide hormone secretion
90277	1	0	0	0	1	1	1	0	0	0.9184	positive regulation of peptide hormone secretion
90276	2	0	0	0	1	1	1	0	0	0.9842	regulation of peptide hormone secretion
90257	25	0	0	0	1	1	1	0	0	0.9849	regulation of muscle system process
90219	1	0	0	0	1	1	1	0	0	0.9184	negative regulation of lipid kinase activity
90218	1	0	0	0	1	1	1	0	0	0.9184	positive regulation of lipid kinase activity
90217	1	0	0	0	1	1	1	0	0	0.9184	negative regulation of 1-phosphatidylinositol-4-phosphate 5-kinase activity
90216	1	0	0	0	1	1	1	0	0	0.9184	positive regulation of 1-phosphatidylinositol-4-phosphate 5-kinase activity
90215	2	0	0	0	1	1	1	0	0	0.9842	regulation of 1-phosphatidylinositol-4-phosphate 5-kinase activity
90208	2	0	0	0	1	1	1	0	0	0.9842	positive regulation of triglyceride metabolic process
90207	2	0	0	0	1	1	1	0	0	0.9842	regulation of triglyceride metabolic process
90200	1	0	0	0	1	1	1	0	0	0.9184	positive regulation of release of cytochrome c from mitochondria
90199	1	0	0	0	1	1	1	0	0	0.9184	regulation of release of cytochrome c from mitochondria
90175	4	0	0	0	1	1	1	0	0	0.9412	regulation of establishment of planar polarity
90173	1	0	0	0	1	1	1	0	0	0.9184	regulation of synaptonemal complex assembly
90162	1	0	0	0	1	1	1	0	0	0.9184	establishment of epithelial cell polarity
90151	5	0	0	0	1	1	1	0	0	0.9789	establishment of protein localization to mitochondrial membrane
90150	34	0	0	0	1	1	1	0	0	0.9549	establishment of protein localization to membrane
90141	1	0	0	0	1	1	1	0	0	0.9184	positive regulation of mitochondrial fission
90140	1	0	0	0	1	1	1	0	0	0.9184	regulation of mitochondrial fission
90138	1	0	0	0	1	1	1	0	0	0.9184	regulation of actin cytoskeleton organization by cell-cell adhesion
90136	4	0	0	0	1	1	1	0	0	0.9412	epithelial cell-cell adhesion
90132	7	0	0	0	1	1	1	0	0	0.9979	epithelium migration
90130	7	0	0	0	1	1	1	0	0	0.9979	tissue migration
90114	2	0	0	0	1	1	1	0	0	0.9842	COPII-coated vesicle budding
90101	8	0	0	0	1	1	1	0	0	0.9803	negative regulation of transmembrane receptor protein serine/threonine kinase signaling pathway
90100	10	0	0	0	1	1	1	0	0	0.9884	positive regulation of transmembrane receptor protein serine/threonine kinase signaling pathway
90092	19	0	0	0	1	1	1	0	0	0.9669	regulation of transmembrane receptor protein serine/threonine kinase signaling pathway
90090	1	0	0	0	1	1	1	0	0	0.9184	negative regulation of canonical Wnt signaling pathway
90087	10	0	0	0	1	1	1	0	0	0.9884	regulation of peptide transport
90085	2	0	0	0	1	1	1	0	0	0.9842	regulation of protein deubiquitination
90071	2	0	0	0	1	1	1	0	0	0.9842	negative regulation of ribosome biogenesis
90069	2	0	0	0	1	1	1	0	0	0.9842	regulation of ribosome biogenesis
90068	29	0	0	0	1	1	1	0	0	0.9879	positive regulation of cell cycle process
90063	1	0	0	0	1	1	1	0	0	0.9184	positive regulation of microtubule nucleation
90038	7	0	0	0	1	1	1	0	0	0.9979	negative regulation of protein kinase C signaling
90036	7	0	0	0	1	1	1	0	0	0.9979	regulation of protein kinase C signaling
90002	8	0	0	0	1	1	1	0	0	0.9803	establishment of protein localization to plasma membrane
89711	1	0	0	0	1	1	1	0	0	0.9184	L-glutamate transmembrane transport
86010	4	0	0	0	1	1	1	0	0	0.9412	membrane depolarization during action potential
85029	2	0	0	0	1	1	1	0	0	0.9842	extracellular matrix assembly
80182	1	0	0	0	1	1	1	0	0	0.9184	histone H3-K4 trimethylation
80171	21	0	0	0	1	1	1	0	0	0.99	lytic vacuole organization
80144	2	0	0	0	1	1	1	0	0	0.9842	amino acid homeostasis
80135	53	0	0	0	1	1	1	0	0	0.9948	regulation of cellular response to stress
80134	68	0	0	0	1	1	1	0	0	0.9215	regulation of response to stress
80120	2	0	0	0	1	1	1	0	0	0.9842	CAAX-box protein maturation
80111	1	0	0	0	1	1	1	0	0	0.9184	DNA demethylation
80058	3	0	0	0	1	1	1	0	0	0.9976	protein deglutathionylation
80009	1	0	0	0	1	1	1	0	0	0.9184	mRNA methylation
75015	5	0	0	0	1	1	1	0	0	0.9789	formation of infection structure on or near host
72755	1	0	0	0	1	1	1	0	0	0.9184	cellular response to benomyl
72741	1	0	0	0	1	1	1	0	0	0.9184	protein localization to cell division site
72698	3	0	0	0	1	1	1	0	0	0.9976	protein localization to microtubule cytoskeleton
72697	4	0	0	0	1	1	1	0	0	0.9412	protein localization to cell cortex
72689	1	0	0	0	1	1	1	0	0	0.9184	MCM complex assembly
72684	1	0	0	0	1	1	1	0	0	0.9184	mitochondrial tRNA 3'-trailer cleavage, endonucleolytic
72671	1	0	0	0	1	1	1	0	0	0.9184	mitochondria-associated ubiquitin-dependent protein catabolic process
72666	8	0	0	0	1	1	1	0	0	0.9803	establishment of protein localization to vacuole
72665	9	0	0	0	1	1	1	0	0	0.9942	protein localization to vacuole
72663	10	0	0	0	1	1	1	0	0	0.9884	establishment of protein localization to peroxisome
72662	10	0	0	0	1	1	1	0	0	0.9884	protein localization to peroxisome
72661	1	0	0	0	1	1	1	0	0	0.9184	protein targeting to plasma membrane
72659	35	0	0	0	1	1	1	0	0	0.9963	protein localization to plasma membrane
72655	22	0	0	0	1	1	1	0	0	0.9234	establishment of protein localization to mitochondrion
72600	4	0	0	0	1	1	1	0	0	0.9412	establishment of protein localization to Golgi
72599	12	0	0	0	1	1	1	0	0	0.9974	establishment of protein localization to endoplasmic reticulum
72595	3	0	0	0	1	1	1	0	0	0.9976	maintenance of protein localization in organelle
72594	84	0	0	0	1	1	1	0	0	0.9681	establishment of protein localization to organelle
72593	15	0	0	0	1	1	1	0	0	0.922	reactive oxygen species metabolic process
72583	11	0	0	0	1	1	1	0	0	0.9526	clathrin-mediated endocytosis
72553	2	0	0	0	1	1	1	0	0	0.9842	terminal button organization
72531	2	0	0	0	1	1	1	0	0	0.9842	pyrimidine-containing compound transmembrane transport
72530	2	0	0	0	1	1	1	0	0	0.9842	purine-containing compound transmembrane transport
72529	11	0	0	0	1	1	1	0	0	0.9526	pyrimidine-containing compound catabolic process
72528	18	0	0	0	1	1	1	0	0	0.964	pyrimidine-containing compound biosynthetic process
72527	31	0	0	0	1	1	1	0	0	0.9621	pyrimidine-containing compound metabolic process
72526	1	0	0	0	1	1	1	0	0	0.9184	pyridine-containing compound catabolic process
72525	12	0	0	0	1	1	1	0	0	0.9974	pyridine-containing compound biosynthetic process
72524	47	0	0	0	1	1	1	0	0	0.9639	pyridine-containing compound metabolic process
72523	15	0	0	0	1	1	1	0	0	0.922	purine-containing compound catabolic process
72511	70	0	0	0	1	1	1	0	0	0.9642	divalent inorganic cation transport
72507	42	0	0	0	1	1	1	0	0	0.986	divalent inorganic cation homeostasis
72506	2	0	0	0	1	1	1	0	0	0.9842	trivalent inorganic anion homeostasis
72505	2	0	0	0	1	1	1	0	0	0.9842	divalent inorganic anion homeostasis
72503	40	0	0	0	1	1	1	0	0	0.9709	cellular divalent inorganic cation homeostasis
72502	2	0	0	0	1	1	1	0	0	0.9842	cellular trivalent inorganic anion homeostasis
72501	2	0	0	0	1	1	1	0	0	0.9842	cellular divalent inorganic anion homeostasis
72488	18	0	0	0	1	1	1	0	0	0.964	ammonium transmembrane transport
72422	1	0	0	0	1	1	1	0	0	0.9184	signal transduction involved in DNA damage checkpoint
72401	1	0	0	0	1	1	1	0	0	0.9184	signal transduction involved in DNA integrity checkpoint
72395	1	0	0	0	1	1	1	0	0	0.9184	signal transduction involved in cell cycle checkpoint
72388	1	0	0	0	1	1	1	0	0	0.9184	flavin adenine dinucleotide biosynthetic process
72387	1	0	0	0	1	1	1	0	0	0.9184	flavin adenine dinucleotide metabolic process
72375	4	0	0	0	1	1	1	0	0	0.9412	medium-term memory
72366	1	0	0	0	1	1	1	0	0	0.9184	regulation of cellular ketone metabolic process by positive regulation of transcription from RNA polymerase II promoter
72364	1	0	0	0	1	1	1	0	0	0.9184	regulation of cellular ketone metabolic process by regulation of transcription from RNA polymerase II promoter
72359	13	0	0	0	1	1	1	0	0	0.9605	circulatory system development
72358	13	0	0	0	1	1	1	0	0	0.9605	cardiovascular system development
72350	27	0	0	0	1	1	1	0	0	0.971	tricarboxylic acid metabolic process
72348	12	0	0	0	1	1	1	0	0	0.9974	sulfur compound transport
72347	1	0	0	0	1	1	1	0	0	0.9184	response to anesthetic
72344	2	0	0	0	1	1	1	0	0	0.9842	rescue of stalled ribosome
72337	1	0	0	0	1	1	1	0	0	0.9184	modified amino acid transport
72334	2	0	0	0	1	1	1	0	0	0.9842	UDP-galactose transmembrane transport
72332	7	0	0	0	1	1	1	0	0	0.9979	intrinsic apoptotic signaling pathway by p53 class mediator
72331	17	0	0	0	1	1	1	0	0	0.9711	signal transduction by p53 class mediator
72330	46	0	0	0	1	1	1	0	0	0.9618	monocarboxylic acid biosynthetic process
72329	39	0	0	0	1	1	1	0	0	0.9919	monocarboxylic acid catabolic process
72327	2	0	0	0	1	1	1	0	0	0.9842	vulval cell fate specification
72325	3	0	0	0	1	1	1	0	0	0.9976	vulval cell fate commitment
72321	1	0	0	0	1	1	1	0	0	0.9184	chaperone-mediated protein transport
72319	1	0	0	0	1	1	1	0	0	0.9184	vesicle uncoating
72089	13	0	0	0	1	1	1	0	0	0.9605	stem cell proliferation
71982	4	0	0	0	1	1	1	0	0	0.9412	maintenance of diapause
71981	9	0	0	0	1	1	1	0	0	0.9942	exit from diapause
71947	2	0	0	0	1	1	1	0	0	0.9842	protein deubiquitination involved in ubiquitin-dependent protein catabolic process
71941	2	0	0	0	1	1	1	0	0	0.9842	nitrogen cycle metabolic process
71929	2	0	0	0	1	1	1	0	0	0.9842	alpha-tubulin acetylation
71927	2	0	0	0	1	1	1	0	0	0.9842	octopamine signaling pathway
71922	1	0	0	0	1	1	1	0	0	0.9184	regulation of cohesin loading
71921	1	0	0	0	1	1	1	0	0	0.9184	cohesin loading
71918	6	0	0	0	1	1	1	0	0	0.9891	urea transmembrane transport
71901	14	0	0	0	1	1	1	0	0	0.9565	negative regulation of protein serine/threonine kinase activity
71897	25	0	0	0	1	1	1	0	0	0.9849	DNA biosynthetic process
71880	1	0	0	0	1	1	1	0	0	0.9184	adenylate cyclase-activating adrenergic receptor signaling pathway
71875	1	0	0	0	1	1	1	0	0	0.9184	adrenergic receptor signaling pathway
71850	4	0	0	0	1	1	1	0	0	0.9412	mitotic cell cycle arrest
71826	116	0	0	0	1	1	1	0	0	0.9705	ribonucleoprotein complex subunit organization
71825	2	0	0	0	1	1	1	0	0	0.9842	protein-lipid complex subunit organization
71824	50	0	0	0	1	1	1	0	0	0.9867	protein-DNA complex subunit organization
71816	1	0	0	0	1	1	1	0	0	0.9184	tail-anchored membrane protein insertion into ER membrane
71806	27	0	0	0	1	1	1	0	0	0.971	protein transmembrane transport
71786	2	0	0	0	1	1	1	0	0	0.9842	endoplasmic reticulum tubular network organization
71774	6	0	0	0	1	1	1	0	0	0.9891	response to fibroblast growth factor
71773	7	0	0	0	1	1	1	0	0	0.9979	cellular response to BMP stimulus
71772	7	0	0	0	1	1	1	0	0	0.9979	response to BMP
71722	1	0	0	0	1	1	1	0	0	0.9184	detoxification of arsenic-containing substance
71712	4	0	0	0	1	1	1	0	0	0.9412	ER-associated misfolded protein catabolic process
71711	5	0	0	0	1	1	1	0	0	0.9789	basement membrane organization
71709	2	0	0	0	1	1	1	0	0	0.9842	membrane assembly
71689	5	0	0	0	1	1	1	0	0	0.9789	muscle thin filament assembly
71679	1	0	0	0	1	1	1	0	0	0.9184	commissural neuron axon guidance
71630	1	0	0	0	1	1	1	0	0	0.9184	nucleus-associated proteasomal ubiquitin-dependent protein catabolic process
71616	4	0	0	0	1	1	1	0	0	0.9412	acyl-CoA biosynthetic process
71596	2	0	0	0	1	1	1	0	0	0.9842	ubiquitin-dependent protein catabolic process via the N-end rule pathway
71586	2	0	0	0	1	1	1	0	0	0.9842	CAAX-box protein processing
71585	2	0	0	0	1	1	1	0	0	0.9842	detoxification of cadmium ion
71577	22	0	0	0	1	1	1	0	0	0.9234	zinc II ion transmembrane transport
71569	1	0	0	0	1	1	1	0	0	0.9184	protein ufmylation
71560	28	0	0	0	1	1	1	0	0	0.9978	cellular response to transforming growth factor beta stimulus
71559	28	0	0	0	1	1	1	0	0	0.9978	response to transforming growth factor beta
71557	3	0	0	0	1	1	1	0	0	0.9976	histone H3-K27 demethylation
71554	8	0	0	0	1	1	1	0	0	0.9803	cell wall organization or biogenesis
71545	2	0	0	0	1	1	1	0	0	0.9842	inositol phosphate catabolic process
71542	1	0	0	0	1	1	1	0	0	0.9184	dopaminergic neuron differentiation
71539	3	0	0	0	1	1	1	0	0	0.9976	protein localization to centrosome
71526	7	0	0	0	1	1	1	0	0	0.9979	semaphorin-plexin signaling pathway
71501	2	0	0	0	1	1	1	0	0	0.9842	cellular response to sterol depletion
71496	23	0	0	0	1	1	1	0	0	0.9551	cellular response to external stimulus
71495	354	0	0	0	1	1	1	0	0	0.9735	cellular response to endogenous stimulus
71483	1	0	0	0	1	1	1	0	0	0.9184	cellular response to blue light
71482	3	0	0	0	1	1	1	0	0	0.9976	cellular response to light stimulus
71481	2	0	0	0	1	1	1	0	0	0.9842	cellular response to X-ray
71480	2	0	0	0	1	1	1	0	0	0.9842	cellular response to gamma radiation
71479	3	0	0	0	1	1	1	0	0	0.9976	cellular response to ionizing radiation
71478	6	0	0	0	1	1	1	0	0	0.9891	cellular response to radiation
71475	1	0	0	0	1	1	1	0	0	0.9184	cellular hyperosmotic salinity response
71474	2	0	0	0	1	1	1	0	0	0.9842	cellular hyperosmotic response
71472	1	0	0	0	1	1	1	0	0	0.9184	cellular response to salt stress
71470	5	0	0	0	1	1	1	0	0	0.9789	cellular response to osmotic stress
71468	1	0	0	0	1	1	1	0	0	0.9184	cellular response to acidic pH
71467	2	0	0	0	1	1	1	0	0	0.9842	cellular response to pH
71459	1	0	0	0	1	1	1	0	0	0.9184	protein localization to chromosome, centromeric region
71456	1	0	0	0	1	1	1	0	0	0.9184	cellular response to hypoxia
71453	1	0	0	0	1	1	1	0	0	0.9184	cellular response to oxygen levels
71451	5	0	0	0	1	1	1	0	0	0.9789	cellular response to superoxide
71450	5	0	0	0	1	1	1	0	0	0.9789	cellular response to oxygen radical
71436	2	0	0	0	1	1	1	0	0	0.9842	sodium ion export
71431	2	0	0	0	1	1	1	0	0	0.9842	tRNA-containing ribonucleoprotein complex export from nucleus
71428	5	0	0	0	1	1	1	0	0	0.9789	rRNA-containing ribonucleoprotein complex export from nucleus
71422	4	0	0	0	1	1	1	0	0	0.9412	succinate transmembrane transport
71421	1	0	0	0	1	1	1	0	0	0.9184	manganese ion transmembrane transport
71417	23	0	0	0	1	1	1	0	0	0.9551	cellular response to organonitrogen compound
71407	304	0	0	0	1	1	1	0	0	0.9529	cellular response to organic cyclic compound
71396	284	0	0	0	1	1	1	0	0	0.7764	cellular response to lipid
71383	284	0	0	0	1	1	1	0	0	0.7764	cellular response to steroid hormone stimulus
71375	19	0	0	0	1	1	1	0	0	0.9669	cellular response to peptide hormone stimulus
71363	40	0	0	0	1	1	1	0	0	0.9709	cellular response to growth factor stimulus
71359	19	0	0	0	1	1	1	0	0	0.9669	cellular response to dsRNA
71345	5	0	0	0	1	1	1	0	0	0.9789	cellular response to cytokine stimulus
71310	467	0	0	0	1	1	1	0	0	0.9735	cellular response to organic substance
71294	3	0	0	0	1	1	1	0	0	0.9976	cellular response to zinc ion
71267	10	0	0	0	1	1	1	0	0	0.9884	L-methionine salvage
71265	10	0	0	0	1	1	1	0	0	0.9884	L-methionine biosynthetic process
71248	3	0	0	0	1	1	1	0	0	0.9976	cellular response to metal ion
71243	1	0	0	0	1	1	1	0	0	0.9184	cellular response to arsenic-containing substance
71242	7	0	0	0	1	1	1	0	0	0.9979	cellular response to ammonium ion
71241	3	0	0	0	1	1	1	0	0	0.9976	cellular response to inorganic substance
71230	3	0	0	0	1	1	1	0	0	0.9976	cellular response to amino acid stimulus
71229	3	0	0	0	1	1	1	0	0	0.9976	cellular response to acid chemical
71218	8	0	0	0	1	1	1	0	0	0.9803	cellular response to misfolded protein
71214	13	0	0	0	1	1	1	0	0	0.9605	cellular response to abiotic stimulus
71174	7	0	0	0	1	1	1	0	0	0.9979	mitotic spindle checkpoint
71173	7	0	0	0	1	1	1	0	0	0.9979	spindle assembly checkpoint
71168	3	0	0	0	1	1	1	0	0	0.9976	protein localization to chromatin
71163	1	0	0	0	1	1	1	0	0	0.9184	DNA replication preinitiation complex assembly
71158	3	0	0	0	1	1	1	0	0	0.9976	positive regulation of cell cycle arrest
71156	3	0	0	0	1	1	1	0	0	0.9976	regulation of cell cycle arrest
71139	1	0	0	0	1	1	1	0	0	0.9184	resolution of recombination intermediates
71108	2	0	0	0	1	1	1	0	0	0.9842	protein K48-linked deubiquitination
71103	74	0	0	0	1	1	1	0	0	0.9794	DNA conformation change
71076	1	0	0	0	1	1	1	0	0	0.9184	RNA 3' uridylation
71051	5	0	0	0	1	1	1	0	0	0.9789	polyadenylation-dependent snoRNA 3'-end processing
71049	2	0	0	0	1	1	1	0	0	0.9842	nuclear retention of pre-mRNA with aberrant 3'-ends at the site of transcription
71048	1	0	0	0	1	1	1	0	0	0.9184	nuclear retention of unspliced pre-mRNA at the site of transcription
71047	3	0	0	0	1	1	1	0	0	0.9976	polyadenylation-dependent mRNA catabolic process
71046	5	0	0	0	1	1	1	0	0	0.9789	nuclear polyadenylation-dependent ncRNA catabolic process
71043	2	0	0	0	1	1	1	0	0	0.9842	CUT metabolic process
71042	3	0	0	0	1	1	1	0	0	0.9976	nuclear polyadenylation-dependent mRNA catabolic process
71038	5	0	0	0	1	1	1	0	0	0.9789	nuclear polyadenylation-dependent tRNA catabolic process
71035	5	0	0	0	1	1	1	0	0	0.9789	nuclear polyadenylation-dependent rRNA catabolic process
71034	2	0	0	0	1	1	1	0	0	0.9842	CUT catabolic process
71033	3	0	0	0	1	1	1	0	0	0.9976	nuclear retention of pre-mRNA at the site of transcription
71031	2	0	0	0	1	1	1	0	0	0.9842	nuclear mRNA surveillance of mRNA 3'-end processing
71030	1	0	0	0	1	1	1	0	0	0.9184	nuclear mRNA surveillance of spliceosomal pre-mRNA splicing
71029	5	0	0	0	1	1	1	0	0	0.9789	nuclear ncRNA surveillance
71028	10	0	0	0	1	1	1	0	0	0.9884	nuclear mRNA surveillance
71027	10	0	0	0	1	1	1	0	0	0.9884	nuclear RNA surveillance
71025	11	0	0	0	1	1	1	0	0	0.9526	RNA surveillance
70997	10	0	0	0	1	1	1	0	0	0.9884	neuron death
70989	1	0	0	0	1	1	1	0	0	0.9184	oxidative demethylation
70988	12	0	0	0	1	1	1	0	0	0.9974	demethylation
70973	2	0	0	0	1	1	1	0	0	0.9842	protein localization to endoplasmic reticulum exit site
70972	16	0	0	0	1	1	1	0	0	0.9475	protein localization to endoplasmic reticulum
70966	1	0	0	0	1	1	1	0	0	0.9184	nuclear-transcribed mRNA catabolic process, no-go decay
70940	2	0	0	0	1	1	1	0	0	0.9842	dephosphorylation of RNA polymerase II C-terminal domain
70932	6	0	0	0	1	1	1	0	0	0.9891	histone H3 deacetylation
70922	2	0	0	0	1	1	1	0	0	0.9842	small RNA loading onto RISC
70920	2	0	0	0	1	1	1	0	0	0.9842	regulation of production of small RNA involved in gene silencing by RNA
70918	19	0	0	0	1	1	1	0	0	0.9669	production of small RNA involved in gene silencing by RNA
70914	2	0	0	0	1	1	1	0	0	0.9842	UV-damage excision repair
70903	1	0	0	0	1	1	1	0	0	0.9184	mitochondrial tRNA thio-modification
70900	1	0	0	0	1	1	1	0	0	0.9184	mitochondrial tRNA modification
70897	17	0	0	0	1	1	1	0	0	0.9711	DNA-templated transcriptional preinitiation complex assembly
70887	495	0	0	0	1	1	1	0	0	0.9735	cellular response to chemical stimulus
70884	1	0	0	0	1	1	1	0	0	0.9184	regulation of calcineurin-NFAT signaling cascade
70848	40	0	0	0	1	1	1	0	0	0.9709	response to growth factor
70838	70	0	0	0	1	1	1	0	0	0.9642	divalent metal ion transport
70836	2	0	0	0	1	1	1	0	0	0.9842	caveola assembly
70831	2	0	0	0	1	1	1	0	0	0.9842	basement membrane assembly
70830	2	0	0	0	1	1	1	0	0	0.9842	bicellular tight junction assembly
70828	1	0	0	0	1	1	1	0	0	0.9184	heterochromatin organization
70816	8	0	0	0	1	1	1	0	0	0.9803	phosphorylation of RNA polymerase II C-terminal domain
70782	1	0	0	0	1	1	1	0	0	0.9184	phosphatidylserine exposure on apoptotic cell surface
70734	3	0	0	0	1	1	1	0	0	0.9976	histone H3-K27 methylation
70682	2	0	0	0	1	1	1	0	0	0.9842	proteasome regulatory particle assembly
70681	2	0	0	0	1	1	1	0	0	0.9842	glutaminyl-tRNAGln biosynthesis via transamidation
70613	2	0	0	0	1	1	1	0	0	0.9842	regulation of protein processing
70589	1	0	0	0	1	1	1	0	0	0.9184	cellular component macromolecule biosynthetic process
70588	34	0	0	0	1	1	1	0	0	0.9549	calcium ion transmembrane transport
70587	2	0	0	0	1	1	1	0	0	0.9842	regulation of cell-cell adhesion involved in gastrulation
70586	2	0	0	0	1	1	1	0	0	0.9842	cell-cell adhesion involved in gastrulation
70585	22	0	0	0	1	1	1	0	0	0.9234	protein localization to mitochondrion
70584	4	0	0	0	1	1	1	0	0	0.9412	mitochondrion morphogenesis
70574	1	0	0	0	1	1	1	0	0	0.9184	cadmium ion transmembrane transport
70572	3	0	0	0	1	1	1	0	0	0.9976	positive regulation of neuron projection regeneration
70571	5	0	0	0	1	1	1	0	0	0.9789	negative regulation of neuron projection regeneration
70570	8	0	0	0	1	1	1	0	0	0.9803	regulation of neuron projection regeneration
70544	3	0	0	0	1	1	1	0	0	0.9976	histone H3-K36 demethylation
70536	2	0	0	0	1	1	1	0	0	0.9842	protein K63-linked deubiquitination
70534	4	0	0	0	1	1	1	0	0	0.9412	protein K63-linked ubiquitination
70528	7	0	0	0	1	1	1	0	0	0.9979	protein kinase C signaling
70525	5	0	0	0	1	1	1	0	0	0.9789	tRNA threonylcarbamoyladenosine metabolic process
70509	7	0	0	0	1	1	1	0	0	0.9979	calcium ion import
70508	1	0	0	0	1	1	1	0	0	0.9184	cholesterol import
70482	29	0	0	0	1	1	1	0	0	0.9879	response to oxygen levels
70481	1	0	0	0	1	1	1	0	0	0.9184	nuclear-transcribed mRNA catabolic process, non-stop decay
70476	1	0	0	0	1	1	1	0	0	0.9184	rRNA (guanine-N7)-methylation
70475	3	0	0	0	1	1	1	0	0	0.9976	rRNA base methylation
70304	4	0	0	0	1	1	1	0	0	0.9412	positive regulation of stress-activated protein kinase signaling cascade
70303	1	0	0	0	1	1	1	0	0	0.9184	negative regulation of stress-activated protein kinase signaling cascade
70302	5	0	0	0	1	1	1	0	0	0.9789	regulation of stress-activated protein kinase signaling cascade
70301	4	0	0	0	1	1	1	0	0	0.9412	cellular response to hydrogen peroxide
70291	2	0	0	0	1	1	1	0	0	0.9842	N-acylethanolamine metabolic process
70272	1	0	0	0	1	1	1	0	0	0.9184	proton-transporting ATP synthase complex biogenesis
70265	29	0	0	0	1	1	1	0	0	0.9879	necrotic cell death
70262	2	0	0	0	1	1	1	0	0	0.9842	peptidyl-serine dephosphorylation
70252	4	0	0	0	1	1	1	0	0	0.9412	actin-mediated cell contraction
70217	1	0	0	0	1	1	1	0	0	0.9184	transcription factor TFIIIB complex assembly
70212	2	0	0	0	1	1	1	0	0	0.9842	protein poly-ADP-ribosylation
70207	2	0	0	0	1	1	1	0	0	0.9842	protein homotrimerization
70206	2	0	0	0	1	1	1	0	0	0.9842	protein trimerization
70201	21	0	0	0	1	1	1	0	0	0.99	regulation of establishment of protein localization
70199	2	0	0	0	1	1	1	0	0	0.9842	establishment of protein localization to chromosome
70194	2	0	0	0	1	1	1	0	0	0.9842	synaptonemal complex disassembly
70193	10	0	0	0	1	1	1	0	0	0.9884	synaptonemal complex organization
70192	28	0	0	0	1	1	1	0	0	0.9978	chromosome organization involved in meiotic cell cycle
70189	4	0	0	0	1	1	1	0	0	0.9412	kynurenine metabolic process
70142	1	0	0	0	1	1	1	0	0	0.9184	synaptic vesicle budding
70131	1	0	0	0	1	1	1	0	0	0.9184	positive regulation of mitochondrial translation
70129	1	0	0	0	1	1	1	0	0	0.9184	regulation of mitochondrial translation
70126	4	0	0	0	1	1	1	0	0	0.9412	mitochondrial translational termination
70125	2	0	0	0	1	1	1	0	0	0.9842	mitochondrial translational elongation
70124	1	0	0	0	1	1	1	0	0	0.9184	mitochondrial translational initiation
70096	2	0	0	0	1	1	1	0	0	0.9842	mitochondrial outer membrane translocase complex assembly
70085	127	0	0	0	1	1	1	0	0	0.7787	glycosylation
70084	1	0	0	0	1	1	1	0	0	0.9184	protein initiator methionine removal
70076	10	0	0	0	1	1	1	0	0	0.9884	histone lysine demethylation
70072	6	0	0	0	1	1	1	0	0	0.9891	vacuolar proton-transporting V-type ATPase complex assembly
70071	7	0	0	0	1	1	1	0	0	0.9979	proton-transporting two-sector ATPase complex assembly
70070	6	0	0	0	1	1	1	0	0	0.9891	proton-transporting V-type ATPase complex assembly
70054	2	0	0	0	1	1	1	0	0	0.9842	mRNA splicing, via endonucleolytic cleavage and ligation
65005	2	0	0	0	1	1	1	0	0	0.9842	protein-lipid complex assembly
65004	47	0	0	0	1	1	1	0	0	0.9639	protein-DNA complex assembly
65002	26	0	0	0	1	1	1	0	0	0.97	intracellular protein transmembrane transport
65001	14	0	0	0	1	1	1	0	0	0.9565	specification of axis polarity
61727	3	0	0	0	1	1	1	0	0	0.9976	methylglyoxal catabolic process to lactate
61726	20	0	0	0	1	1	1	0	0	0.9286	mitochondrion disassembly
61687	2	0	0	0	1	1	1	0	0	0.9842	detoxification of inorganic compound
61647	5	0	0	0	1	1	1	0	0	0.9789	histone H3-K9 modification
61640	37	0	0	0	1	1	1	0	0	0.9925	cytoskeleton-dependent cytokinesis
61615	2	0	0	0	1	1	1	0	0	0.9842	glycolytic process through fructose-6-phosphate
61614	1	0	0	0	1	1	1	0	0	0.9184	pri-miRNA transcription from RNA polymerase II promoter
61572	6	0	0	0	1	1	1	0	0	0.9891	actin filament bundle organization
61544	1	0	0	0	1	1	1	0	0	0.9184	peptide secretion, neurotransmission
61526	11	0	0	0	1	1	1	0	0	0.9526	acetylcholine secretion
61525	3	0	0	0	1	1	1	0	0	0.9976	hindgut development
61512	23	0	0	0	1	1	1	0	0	0.9551	protein localization to cilium
61504	1	0	0	0	1	1	1	0	0	0.9184	cyclic threonylcarbamoyladenosine biosynthetic process
61448	1	0	0	0	1	1	1	0	0	0.9184	connective tissue development
61433	1	0	0	0	1	1	1	0	0	0.9184	cellular response to caloric restriction
61416	1	0	0	0	1	1	1	0	0	0.9184	regulation of transcription from RNA polymerase II promoter in response to salt stress
61408	1	0	0	0	1	1	1	0	0	0.9184	positive regulation of transcription from RNA polymerase II promoter in response to heat stress
61404	1	0	0	0	1	1	1	0	0	0.9184	positive regulation of transcription from RNA polymerase II promoter in response to increased salt
61393	1	0	0	0	1	1	1	0	0	0.9184	positive regulation of transcription from RNA polymerase II promoter in response to osmotic stress
61392	1	0	0	0	1	1	1	0	0	0.9184	regulation of transcription from RNA polymerase II promoter in response to osmotic stress
61365	2	0	0	0	1	1	1	0	0	0.9842	positive regulation of triglyceride lipase activity
61359	2	0	0	0	1	1	1	0	0	0.9842	regulation of Wnt signaling pathway by Wnt protein secretion
61357	2	0	0	0	1	1	1	0	0	0.9842	positive regulation of Wnt protein secretion
61356	2	0	0	0	1	1	1	0	0	0.9842	regulation of Wnt protein secretion
61355	3	0	0	0	1	1	1	0	0	0.9976	Wnt protein secretion
61351	13	0	0	0	1	1	1	0	0	0.9605	neural precursor cell proliferation
61245	9	0	0	0	1	1	1	0	0	0.9942	establishment or maintenance of bipolar cell polarity
61204	1	0	0	0	1	1	1	0	0	0.9184	paramyosin filament assembly or disassembly
61203	1	0	0	0	1	1	1	0	0	0.9184	striated muscle paramyosin thick filament assembly
61199	23	0	0	0	1	1	1	0	0	0.9551	striated muscle contraction involved in embryonic body morphogenesis
61136	35	0	0	0	1	1	1	0	0	0.9963	regulation of proteasomal protein catabolic process
61099	2	0	0	0	1	1	1	0	0	0.9842	negative regulation of protein tyrosine kinase activity
61097	2	0	0	0	1	1	1	0	0	0.9842	regulation of protein tyrosine kinase activity
61096	7	0	0	0	1	1	1	0	0	0.9979	negative regulation of turning behavior involved in mating
61094	7	0	0	0	1	1	1	0	0	0.9979	regulation of turning behavior involved in mating
61088	11	0	0	0	1	1	1	0	0	0.9526	regulation of sequestering of zinc ion
61077	11	0	0	0	1	1	1	0	0	0.9526	chaperone-mediated protein folding
61073	1	0	0	0	1	1	1	0	0	0.9184	ciliary body morphogenesis
61067	12	0	0	0	1	1	1	0	0	0.9974	negative regulation of dauer larval development
61066	11	0	0	0	1	1	1	0	0	0.9526	positive regulation of dauer larval development
61065	26	0	0	0	1	1	1	0	0	0.97	regulation of dauer larval development
61064	235	0	0	0	1	1	1	0	0	0.9918	negative regulation of nematode larval development
61063	90	0	0	0	1	1	1	0	0	0.9947	positive regulation of nematode larval development
61062	320	0	0	0	1	1	1	0	0	0.9278	regulation of nematode larval development
61038	2	0	0	0	1	1	1	0	0	0.9842	uterus morphogenesis
61035	1	0	0	0	1	1	1	0	0	0.9184	regulation of cartilage development
61031	1	0	0	0	1	1	1	0	0	0.9184	endodermal digestive tract morphogenesis
61015	1	0	0	0	1	1	1	0	0	0.9184	snRNA import into nucleus
61014	2	0	0	0	1	1	1	0	0	0.9842	positive regulation of mRNA catabolic process
61013	2	0	0	0	1	1	1	0	0	0.9842	regulation of mRNA catabolic process
60990	2	0	0	0	1	1	1	0	0	0.9842	lipid tube assembly involved in organelle fission
60988	2	0	0	0	1	1	1	0	0	0.9842	lipid tube assembly
60969	5	0	0	0	1	1	1	0	0	0.9789	negative regulation of gene silencing
60968	8	0	0	0	1	1	1	0	0	0.9803	regulation of gene silencing
60967	4	0	0	0	1	1	1	0	0	0.9412	negative regulation of gene silencing by RNA
60966	6	0	0	0	1	1	1	0	0	0.9891	regulation of gene silencing by RNA
60965	2	0	0	0	1	1	1	0	0	0.9842	negative regulation of gene silencing by miRNA
60964	3	0	0	0	1	1	1	0	0	0.9976	regulation of gene silencing by miRNA
60903	2	0	0	0	1	1	1	0	0	0.9842	positive regulation of meiosis I
60850	1	0	0	0	1	1	1	0	0	0.9184	regulation of transcription involved in cell fate commitment
60828	2	0	0	0	1	1	1	0	0	0.9842	regulation of canonical Wnt signaling pathway
60795	33	0	0	0	1	1	1	0	0	0.9857	cell fate commitment involved in formation of primary germ layer
60756	7	0	0	0	1	1	1	0	0	0.9979	foraging behavior
60631	7	0	0	0	1	1	1	0	0	0.9979	regulation of meiosis I
60629	1	0	0	0	1	1	1	0	0	0.9184	regulation of homologous chromosome segregation
60626	7	0	0	0	1	1	1	0	0	0.9979	regulation of cullin deneddylation
60625	7	0	0	0	1	1	1	0	0	0.9979	regulation of protein deneddylation
60582	1	0	0	0	1	1	1	0	0	0.9184	cell fate determination involved in pattern specification
60581	7	0	0	0	1	1	1	0	0	0.9979	cell fate commitment involved in pattern specification
60573	4	0	0	0	1	1	1	0	0	0.9412	cell fate specification involved in pattern specification
60563	1	0	0	0	1	1	1	0	0	0.9184	neuroepithelial cell differentiation
60562	2	0	0	0	1	1	1	0	0	0.9842	epithelial tube morphogenesis
60548	41	0	0	0	1	1	1	0	0	0.9913	negative regulation of cell death
60538	4	0	0	0	1	1	1	0	0	0.9412	skeletal muscle organ development
60537	6	0	0	0	1	1	1	0	0	0.9891	muscle tissue development
60491	8	0	0	0	1	1	1	0	0	0.9803	regulation of cell projection assembly
60485	16	0	0	0	1	1	1	0	0	0.9475	mesenchyme development
60471	4	0	0	0	1	1	1	0	0	0.9412	cortical granule exocytosis
60468	4	0	0	0	1	1	1	0	0	0.9412	prevention of polyspermy
60467	4	0	0	0	1	1	1	0	0	0.9412	negative regulation of fertilization
60465	57	0	0	0	1	1	1	0	0	0.9792	pharynx development
60429	94	0	0	0	1	1	1	0	0	0.997	epithelium development
60402	5	0	0	0	1	1	1	0	0	0.9789	calcium ion transport into cytosol
60401	5	0	0	0	1	1	1	0	0	0.9789	cytosolic calcium ion transport
60395	5	0	0	0	1	1	1	0	0	0.9789	SMAD protein signal transduction
60393	5	0	0	0	1	1	1	0	0	0.9789	regulation of pathway-restricted SMAD protein phosphorylation
60389	5	0	0	0	1	1	1	0	0	0.9789	pathway-restricted SMAD protein phosphorylation
60378	7	0	0	0	1	1	1	0	0	0.9979	regulation of brood size
60359	7	0	0	0	1	1	1	0	0	0.9979	response to ammonium ion
60326	1	0	0	0	1	1	1	0	0	0.9184	cell chemotaxis
60323	1	0	0	0	1	1	1	0	0	0.9184	head morphogenesis
60322	1	0	0	0	1	1	1	0	0	0.9184	head development
60296	1	0	0	0	1	1	1	0	0	0.9184	regulation of cilium beat frequency involved in ciliary motility
60295	1	0	0	0	1	1	1	0	0	0.9184	regulation of cilium movement involved in cell motility
60294	1	0	0	0	1	1	1	0	0	0.9184	cilium movement involved in cell motility
60290	10	0	0	0	1	1	1	0	0	0.9884	transdifferentiation
60285	1	0	0	0	1	1	1	0	0	0.9184	cilium-dependent cell motility
60283	6	0	0	0	1	1	1	0	0	0.9891	negative regulation of oocyte development
60282	3	0	0	0	1	1	1	0	0	0.9976	positive regulation of oocyte development
60281	10	0	0	0	1	1	1	0	0	0.9884	regulation of oocyte development
60280	2	0	0	0	1	1	1	0	0	0.9842	negative regulation of ovulation
60278	3	0	0	0	1	1	1	0	0	0.9976	regulation of ovulation
60271	54	0	0	0	1	1	1	0	0	0.9922	cilium morphogenesis
60261	9	0	0	0	1	1	1	0	0	0.9942	positive regulation of transcription initiation from RNA polymerase II promoter
60260	9	0	0	0	1	1	1	0	0	0.9942	regulation of transcription initiation from RNA polymerase II promoter
60259	43	0	0	0	1	1	1	0	0	0.9574	regulation of feeding behavior
60249	28	0	0	0	1	1	1	0	0	0.9978	anatomical structure homeostasis
60236	3	0	0	0	1	1	1	0	0	0.9976	regulation of mitotic spindle organization
60213	2	0	0	0	1	1	1	0	0	0.9842	positive regulation of nuclear-transcribed mRNA poly(A) tail shortening
60211	2	0	0	0	1	1	1	0	0	0.9842	regulation of nuclear-transcribed mRNA poly(A) tail shortening
60193	2	0	0	0	1	1	1	0	0	0.9842	positive regulation of lipase activity
60191	2	0	0	0	1	1	1	0	0	0.9842	regulation of lipase activity
60184	44	0	0	0	1	1	1	0	0	0.9996	cell cycle switching
60179	55	0	0	0	1	1	1	0	0	0.9619	male mating behavior
60178	1	0	0	0	1	1	1	0	0	0.9184	regulation of exocyst localization
60158	4	0	0	0	1	1	1	0	0	0.9412	phospholipase C-activating dopamine receptor signaling pathway
60149	4	0	0	0	1	1	1	0	0	0.9412	negative regulation of posttranscriptional gene silencing
60148	1	0	0	0	1	1	1	0	0	0.9184	positive regulation of posttranscriptional gene silencing
60147	6	0	0	0	1	1	1	0	0	0.9891	regulation of posttranscriptional gene silencing
60143	1	0	0	0	1	1	1	0	0	0.9184	positive regulation of syncytium formation by plasma membrane fusion
60142	5	0	0	0	1	1	1	0	0	0.9789	regulation of syncytium formation by plasma membrane fusion
60101	7	0	0	0	1	1	1	0	0	0.9979	negative regulation of phagocytosis, engulfment
60100	8	0	0	0	1	1	1	0	0	0.9803	positive regulation of phagocytosis, engulfment
60099	17	0	0	0	1	1	1	0	0	0.9711	regulation of phagocytosis, engulfment
60071	4	0	0	0	1	1	1	0	0	0.9412	Wnt signaling pathway, planar cell polarity pathway
60070	13	0	0	0	1	1	1	0	0	0.9605	canonical Wnt signaling pathway
60069	8	0	0	0	1	1	1	0	0	0.9803	Wnt signaling pathway, regulating spindle positioning
60065	4	0	0	0	1	1	1	0	0	0.9412	uterus development
60051	1	0	0	0	1	1	1	0	0	0.9184	negative regulation of protein glycosylation
60050	1	0	0	0	1	1	1	0	0	0.9184	positive regulation of protein glycosylation
60049	2	0	0	0	1	1	1	0	0	0.9842	regulation of protein glycosylation
60047	1	0	0	0	1	1	1	0	0	0.9184	heart contraction
60003	1	0	0	0	1	1	1	0	0	0.9184	copper ion export
55129	3	0	0	0	1	1	1	0	0	0.9976	L-proline biosynthetic process
55123	84	0	0	0	1	1	1	0	0	0.9681	digestive system development
55115	46	0	0	0	1	1	1	0	0	0.9618	entry into diapause
55093	4	0	0	0	1	1	1	0	0	0.9412	response to hyperoxia
55092	4	0	0	0	1	1	1	0	0	0.9412	sterol homeostasis
55088	29	0	0	0	1	1	1	0	0	0.9879	lipid homeostasis
55083	2	0	0	0	1	1	1	0	0	0.9842	monovalent inorganic anion homeostasis
55082	85	0	0	0	1	1	1	0	0	0.9982	cellular chemical homeostasis
55081	4	0	0	0	1	1	1	0	0	0.9412	anion homeostasis
55080	95	0	0	0	1	1	1	0	0	0.9965	cation homeostasis
55078	2	0	0	0	1	1	1	0	0	0.9842	sodium ion homeostasis
55076	32	0	0	0	1	1	1	0	0	0.9966	transition metal ion homeostasis
55075	2	0	0	0	1	1	1	0	0	0.9842	potassium ion homeostasis
55074	26	0	0	0	1	1	1	0	0	0.97	calcium ion homeostasis
55072	12	0	0	0	1	1	1	0	0	0.9974	iron ion homeostasis
55071	3	0	0	0	1	1	1	0	0	0.9976	manganese ion homeostasis
55070	4	0	0	0	1	1	1	0	0	0.9412	copper ion homeostasis
55069	16	0	0	0	1	1	1	0	0	0.9475	zinc ion homeostasis
55067	36	0	0	0	1	1	1	0	0	0.9427	monovalent inorganic cation homeostasis
55065	60	0	0	0	1	1	1	0	0	0.9962	metal ion homeostasis
55062	2	0	0	0	1	1	1	0	0	0.9842	phosphate ion homeostasis
55059	12	0	0	0	1	1	1	0	0	0.9974	asymmetric neuroblast division
55057	13	0	0	0	1	1	1	0	0	0.9605	neuroblast division
55013	3	0	0	0	1	1	1	0	0	0.9976	cardiac muscle cell development
55007	4	0	0	0	1	1	1	0	0	0.9412	cardiac muscle cell differentiation
55006	3	0	0	0	1	1	1	0	0	0.9976	cardiac cell development
52805	3	0	0	0	1	1	1	0	0	0.9976	imidazole-containing compound catabolic process
52803	3	0	0	0	1	1	1	0	0	0.9976	imidazole-containing compound metabolic process
52696	72	0	0	0	1	1	1	0	0	0.9482	flavonoid glucuronidation
52695	72	0	0	0	1	1	1	0	0	0.9482	cellular glucuronidation
52652	42	0	0	0	1	1	1	0	0	0.986	cyclic purine nucleotide metabolic process
52646	8	0	0	0	1	1	1	0	0	0.9803	alditol phosphate metabolic process
52548	68	0	0	0	1	1	1	0	0	0.9215	regulation of endopeptidase activity
52547	75	0	0	0	1	1	1	0	0	0.9287	regulation of peptidase activity
51988	2	0	0	0	1	1	1	0	0	0.9842	regulation of attachment of spindle microtubules to kinetochore
51984	9	0	0	0	1	1	1	0	0	0.9942	positive regulation of chromosome segregation
51974	1	0	0	0	1	1	1	0	0	0.9184	negative regulation of telomerase activity
51972	1	0	0	0	1	1	1	0	0	0.9184	regulation of telomerase activity
51968	4	0	0	0	1	1	1	0	0	0.9412	positive regulation of synaptic transmission, glutamatergic
51966	4	0	0	0	1	1	1	0	0	0.9412	regulation of synaptic transmission, glutamatergic
51965	2	0	0	0	1	1	1	0	0	0.9842	positive regulation of synapse assembly
51964	6	0	0	0	1	1	1	0	0	0.9891	negative regulation of synapse assembly
51963	9	0	0	0	1	1	1	0	0	0.9942	regulation of synapse assembly
51962	12	0	0	0	1	1	1	0	0	0.9974	positive regulation of nervous system development
51954	8	0	0	0	1	1	1	0	0	0.9803	positive regulation of amine transport
51952	9	0	0	0	1	1	1	0	0	0.9942	regulation of amine transport
51937	1	0	0	0	1	1	1	0	0	0.9184	catecholamine transport
51934	1	0	0	0	1	1	1	0	0	0.9184	catecholamine uptake involved in synaptic transmission
51932	19	0	0	0	1	1	1	0	0	0.9669	synaptic transmission, GABAergic
51928	1	0	0	0	1	1	1	0	0	0.9184	positive regulation of calcium ion transport
51924	5	0	0	0	1	1	1	0	0	0.9789	regulation of calcium ion transport
51923	2	0	0	0	1	1	1	0	0	0.9842	sulfation
51905	1	0	0	0	1	1	1	0	0	0.9184	establishment of pigment granule localization
51904	1	0	0	0	1	1	1	0	0	0.9184	pigment granule transport
51899	4	0	0	0	1	1	1	0	0	0.9412	membrane depolarization
51897	1	0	0	0	1	1	1	0	0	0.9184	positive regulation of protein kinase B signaling
51896	1	0	0	0	1	1	1	0	0	0.9184	regulation of protein kinase B signaling
51881	2	0	0	0	1	1	1	0	0	0.9842	regulation of mitochondrial membrane potential
51875	1	0	0	0	1	1	1	0	0	0.9184	pigment granule localization
51865	4	0	0	0	1	1	1	0	0	0.9412	protein autoubiquitination
51788	10	0	0	0	1	1	1	0	0	0.9884	response to misfolded protein
51785	18	0	0	0	1	1	1	0	0	0.964	positive regulation of nuclear division
51781	23	0	0	0	1	1	1	0	0	0.9551	positive regulation of cell division
51759	4	0	0	0	1	1	1	0	0	0.9412	sister chromosome movement towards spindle pole involved in meiotic sister chromatid segregation
51729	44	0	0	0	1	1	1	0	0	0.9996	germline cell cycle switching, mitotic to meiotic cell cycle
51728	44	0	0	0	1	1	1	0	0	0.9996	cell cycle switching, mitotic to meiotic cell cycle
51705	68	0	0	0	1	1	1	0	0	0.9215	multi-organism behavior
51703	6	0	0	0	1	1	1	0	0	0.9891	intraspecies interaction between organisms
51697	2	0	0	0	1	1	1	0	0	0.9842	protein delipidation
51694	2	0	0	0	1	1	1	0	0	0.9842	pointed-end actin filament capping
51693	7	0	0	0	1	1	1	0	0	0.9979	actin filament capping
51673	2	0	0	0	1	1	1	0	0	0.9842	membrane disruption in other organism
51666	2	0	0	0	1	1	1	0	0	0.9842	actin cortical patch localization
51664	2	0	0	0	1	1	1	0	0	0.9842	nuclear pore localization
51654	1	0	0	0	1	1	1	0	0	0.9184	establishment of mitochondrion localization
51653	57	0	0	0	1	1	1	0	0	0.9792	spindle localization
51651	13	0	0	0	1	1	1	0	0	0.9605	maintenance of location in cell
51647	61	0	0	0	1	1	1	0	0	0.9912	nucleus localization
51646	2	0	0	0	1	1	1	0	0	0.9842	mitochondrion localization
51642	5	0	0	0	1	1	1	0	0	0.9789	centrosome localization
51610	1	0	0	0	1	1	1	0	0	0.9184	serotonin uptake
51607	1	0	0	0	1	1	1	0	0	0.9184	defense response to virus
51606	280	0	0	0	1	1	1	0	0	0.9979	detection of stimulus
51604	54	0	0	0	1	1	1	0	0	0.9922	protein maturation
51601	4	0	0	0	1	1	1	0	0	0.9412	exocyst localization
51596	3	0	0	0	1	1	1	0	0	0.9976	methylglyoxal catabolic process
51595	2	0	0	0	1	1	1	0	0	0.9842	response to methylglyoxal
51592	1	0	0	0	1	1	1	0	0	0.9184	response to calcium ion
51591	2	0	0	0	1	1	1	0	0	0.9842	response to cAMP
51590	11	0	0	0	1	1	1	0	0	0.9526	positive regulation of neurotransmitter transport
51589	2	0	0	0	1	1	1	0	0	0.9842	negative regulation of neurotransmitter transport
51588	18	0	0	0	1	1	1	0	0	0.964	regulation of neurotransmitter transport
51583	1	0	0	0	1	1	1	0	0	0.9184	dopamine uptake involved in synaptic transmission
51574	1	0	0	0	1	1	1	0	0	0.9184	positive regulation of histone H3-K9 methylation
51571	1	0	0	0	1	1	1	0	0	0.9184	positive regulation of histone H3-K4 methylation
51570	1	0	0	0	1	1	1	0	0	0.9184	regulation of histone H3-K9 methylation
51569	2	0	0	0	1	1	1	0	0	0.9842	regulation of histone H3-K4 methylation
51568	12	0	0	0	1	1	1	0	0	0.9974	histone H3-K4 methylation
51567	4	0	0	0	1	1	1	0	0	0.9412	histone H3-K9 methylation
51561	1	0	0	0	1	1	1	0	0	0.9184	positive regulation of mitochondrial calcium ion concentration
51560	2	0	0	0	1	1	1	0	0	0.9842	mitochondrial calcium ion homeostasis
51503	2	0	0	0	1	1	1	0	0	0.9842	adenine nucleotide transport
51495	21	0	0	0	1	1	1	0	0	0.99	positive regulation of cytoskeleton organization
51492	1	0	0	0	1	1	1	0	0	0.9184	regulation of stress fiber assembly
51490	1	0	0	0	1	1	1	0	0	0.9184	negative regulation of filopodium assembly
51489	3	0	0	0	1	1	1	0	0	0.9976	regulation of filopodium assembly
51481	1	0	0	0	1	1	1	0	0	0.9184	negative regulation of cytosolic calcium ion concentration
51480	13	0	0	0	1	1	1	0	0	0.9605	regulation of cytosolic calcium ion concentration
51457	1	0	0	0	1	1	1	0	0	0.9184	maintenance of protein location in nucleus
51453	24	0	0	0	1	1	1	0	0	0.999	regulation of intracellular pH
51452	11	0	0	0	1	1	1	0	0	0.9526	intracellular pH reduction
51451	1	0	0	0	1	1	1	0	0	0.9184	myoblast migration
51446	56	0	0	0	1	1	1	0	0	0.9987	positive regulation of meiotic cell cycle
51443	3	0	0	0	1	1	1	0	0	0.9976	positive regulation of ubiquitin-protein transferase activity
51438	5	0	0	0	1	1	1	0	0	0.9789	regulation of ubiquitin-protein transferase activity
51437	1	0	0	0	1	1	1	0	0	0.9184	positive regulation of ubiquitin-protein ligase activity involved in regulation of mitotic cell cycle transition
51403	11	0	0	0	1	1	1	0	0	0.9526	stress-activated MAPK cascade
51402	4	0	0	0	1	1	1	0	0	0.9412	neuron apoptotic process
51390	2	0	0	0	1	1	1	0	0	0.9842	inactivation of MAPKKK activity
51383	8	0	0	0	1	1	1	0	0	0.9803	kinetochore organization
51382	6	0	0	0	1	1	1	0	0	0.9891	kinetochore assembly
51351	4	0	0	0	1	1	1	0	0	0.9412	positive regulation of ligase activity
51350	1	0	0	0	1	1	1	0	0	0.9184	negative regulation of lyase activity
51349	3	0	0	0	1	1	1	0	0	0.9976	positive regulation of lyase activity
51348	24	0	0	0	1	1	1	0	0	0.999	negative regulation of transferase activity
51346	75	0	0	0	1	1	1	0	0	0.9287	negative regulation of hydrolase activity
51343	1	0	0	0	1	1	1	0	0	0.9184	positive regulation of cyclic-nucleotide phosphodiesterase activity
51342	1	0	0	0	1	1	1	0	0	0.9184	regulation of cyclic-nucleotide phosphodiesterase activity
51341	1	0	0	0	1	1	1	0	0	0.9184	regulation of oxidoreductase activity
51340	4	0	0	0	1	1	1	0	0	0.9412	regulation of ligase activity
51339	4	0	0	0	1	1	1	0	0	0.9412	regulation of lyase activity
51315	4	0	0	0	1	1	1	0	0	0.9412	attachment of mitotic spindle microtubules to kinetochore
51310	4	0	0	0	1	1	1	0	0	0.9412	metaphase plate congression
51308	1	0	0	0	1	1	1	0	0	0.9184	male meiosis chromosome separation
51307	22	0	0	0	1	1	1	0	0	0.9234	meiotic chromosome separation
51306	21	0	0	0	1	1	1	0	0	0.99	mitotic sister chromatid separation
51305	7	0	0	0	1	1	1	0	0	0.9979	chromosome movement towards spindle pole
51304	44	0	0	0	1	1	1	0	0	0.9996	chromosome separation
51303	10	0	0	0	1	1	1	0	0	0.9884	establishment of chromosome localization
51300	2	0	0	0	1	1	1	0	0	0.9842	spindle pole body organization
51299	3	0	0	0	1	1	1	0	0	0.9976	centrosome separation
51298	32	0	0	0	1	1	1	0	0	0.9966	centrosome duplication
51297	40	0	0	0	1	1	1	0	0	0.9709	centrosome organization
51296	5	0	0	0	1	1	1	0	0	0.9789	establishment of meiotic spindle orientation
51295	9	0	0	0	1	1	1	0	0	0.9942	establishment of meiotic spindle localization
51294	38	0	0	0	1	1	1	0	0	0.779	establishment of spindle orientation
51293	55	0	0	0	1	1	1	0	0	0.9619	establishment of spindle localization
51292	2	0	0	0	1	1	1	0	0	0.9842	nuclear pore complex assembly
51289	3	0	0	0	1	1	1	0	0	0.9976	protein homotetramerization
51276	303	0	0	0	1	1	1	0	0	0.9977	chromosome organization
51262	5	0	0	0	1	1	1	0	0	0.9789	protein tetramerization
51261	21	0	0	0	1	1	1	0	0	0.99	protein depolymerization
51260	56	0	0	0	1	1	1	0	0	0.9987	protein homooligomerization
51259	60	0	0	0	1	1	1	0	0	0.9962	protein oligomerization
51258	48	0	0	0	1	1	1	0	0	0.9437	protein polymerization
51256	6	0	0	0	1	1	1	0	0	0.9891	mitotic spindle midzone assembly
51255	6	0	0	0	1	1	1	0	0	0.9891	spindle midzone assembly
51253	107	0	0	0	1	1	1	0	0	0.9913	negative regulation of RNA metabolic process
51248	160	0	0	0	1	1	1	0	0	0.775	negative regulation of protein metabolic process
51238	11	0	0	0	1	1	1	0	0	0.9526	sequestering of metal ion
51235	681	0	0	0	1	1	1	0	0	0.9735	maintenance of location
51230	2	0	0	0	1	1	1	0	0	0.9842	spindle disassembly
51229	2	0	0	0	1	1	1	0	0	0.9842	meiotic spindle disassembly
51225	18	0	0	0	1	1	1	0	0	0.964	spindle assembly
51224	7	0	0	0	1	1	1	0	0	0.9979	negative regulation of protein transport
51223	21	0	0	0	1	1	1	0	0	0.99	regulation of protein transport
51222	7	0	0	0	1	1	1	0	0	0.9979	positive regulation of protein transport
51220	2	0	0	0	1	1	1	0	0	0.9842	cytoplasmic sequestering of protein
51216	1	0	0	0	1	1	1	0	0	0.9184	cartilage development
51205	5	0	0	0	1	1	1	0	0	0.9789	protein insertion into membrane
51189	10	0	0	0	1	1	1	0	0	0.9884	prosthetic group metabolic process
51188	73	0	0	0	1	1	1	0	0	0.9536	cofactor biosynthetic process
51187	3	0	0	0	1	1	1	0	0	0.9976	cofactor catabolic process
51186	134	0	0	0	1	1	1	0	0	0.9858	cofactor metabolic process
51182	1	0	0	0	1	1	1	0	0	0.9184	coenzyme transport
51181	6	0	0	0	1	1	1	0	0	0.9891	cofactor transport
51180	2	0	0	0	1	1	1	0	0	0.9842	vitamin transport
51177	7	0	0	0	1	1	1	0	0	0.9979	meiotic sister chromatid cohesion
51172	164	0	0	0	1	1	1	0	0	0.9969	negative regulation of nitrogen compound metabolic process
51170	28	0	0	0	1	1	1	0	0	0.9978	nuclear import
51156	10	0	0	0	1	1	1	0	0	0.9884	glucose 6-phosphate metabolic process
51155	1	0	0	0	1	1	1	0	0	0.9184	positive regulation of striated muscle cell differentiation
51153	1	0	0	0	1	1	1	0	0	0.9184	regulation of striated muscle cell differentiation
51149	1	0	0	0	1	1	1	0	0	0.9184	positive regulation of muscle cell differentiation
51148	1	0	0	0	1	1	1	0	0	0.9184	negative regulation of muscle cell differentiation
51147	2	0	0	0	1	1	1	0	0	0.9842	regulation of muscle cell differentiation
51131	4	0	0	0	1	1	1	0	0	0.9412	chaperone-mediated protein complex assembly
51130	85	0	0	0	1	1	1	0	0	0.9982	positive regulation of cellular component organization
51127	3	0	0	0	1	1	1	0	0	0.9976	positive regulation of actin nucleation
51126	1	0	0	0	1	1	1	0	0	0.9184	negative regulation of actin nucleation
51125	6	0	0	0	1	1	1	0	0	0.9891	regulation of actin nucleation
51124	1	0	0	0	1	1	1	0	0	0.9184	synaptic growth at neuromuscular junction
51123	16	0	0	0	1	1	1	0	0	0.9475	RNA polymerase II transcriptional preinitiation complex assembly
51103	6	0	0	0	1	1	1	0	0	0.9891	DNA ligation involved in DNA repair
51101	3	0	0	0	1	1	1	0	0	0.9976	regulation of DNA binding
51100	3	0	0	0	1	1	1	0	0	0.9976	negative regulation of binding
51099	2	0	0	0	1	1	1	0	0	0.9842	positive regulation of binding
51098	8	0	0	0	1	1	1	0	0	0.9803	regulation of binding
51096	2	0	0	0	1	1	1	0	0	0.9842	positive regulation of helicase activity
51095	2	0	0	0	1	1	1	0	0	0.9842	regulation of helicase activity
51092	1	0	0	0	1	1	1	0	0	0.9184	positive regulation of NF-kappaB transcription factor activity
51091	7	0	0	0	1	1	1	0	0	0.9979	positive regulation of sequence-specific DNA binding transcription factor activity
51090	11	0	0	0	1	1	1	0	0	0.9526	regulation of sequence-specific DNA binding transcription factor activity
51085	3	0	0	0	1	1	1	0	0	0.9976	chaperone mediated protein folding requiring cofactor
51084	3	0	0	0	1	1	1	0	0	0.9976	'de novo' posttranslational protein folding
51081	3	0	0	0	1	1	1	0	0	0.9976	nuclear envelope disassembly
51066	1	0	0	0	1	1	1	0	0	0.9184	dihydrobiopterin metabolic process
51058	16	0	0	0	1	1	1	0	0	0.9475	negative regulation of small GTPase mediated signal transduction
51057	9	0	0	0	1	1	1	0	0	0.9942	positive regulation of small GTPase mediated signal transduction
51056	55	0	0	0	1	1	1	0	0	0.9619	regulation of small GTPase mediated signal transduction
51055	3	0	0	0	1	1	1	0	0	0.9976	negative regulation of lipid biosynthetic process
51054	10	0	0	0	1	1	1	0	0	0.9884	positive regulation of DNA metabolic process
51053	12	0	0	0	1	1	1	0	0	0.9974	negative regulation of DNA metabolic process
51052	30	0	0	0	1	1	1	0	0	0.988	regulation of DNA metabolic process
51051	29	0	0	0	1	1	1	0	0	0.9879	negative regulation of transport
51048	3	0	0	0	1	1	1	0	0	0.9976	negative regulation of secretion
51047	19	0	0	0	1	1	1	0	0	0.9669	positive regulation of secretion
51046	39	0	0	0	1	1	1	0	0	0.9919	regulation of secretion
51045	2	0	0	0	1	1	1	0	0	0.9842	negative regulation of membrane protein ectodomain proteolysis
51043	2	0	0	0	1	1	1	0	0	0.9842	regulation of membrane protein ectodomain proteolysis
51031	4	0	0	0	1	1	1	0	0	0.9412	tRNA transport
51030	2	0	0	0	1	1	1	0	0	0.9842	snRNA transport
51029	2	0	0	0	1	1	1	0	0	0.9842	rRNA transport
51026	4	0	0	0	1	1	1	0	0	0.9412	chiasma assembly
51017	6	0	0	0	1	1	1	0	0	0.9891	actin filament bundle assembly
51016	5	0	0	0	1	1	1	0	0	0.9789	barbed-end actin filament capping
51014	3	0	0	0	1	1	1	0	0	0.9976	actin filament severing
51013	3	0	0	0	1	1	1	0	0	0.9976	microtubule severing
50999	1	0	0	0	1	1	1	0	0	0.9184	regulation of nitric-oxide synthase activity
50996	3	0	0	0	1	1	1	0	0	0.9976	positive regulation of lipid catabolic process
50994	3	0	0	0	1	1	1	0	0	0.9976	regulation of lipid catabolic process
50983	1	0	0	0	1	1	1	0	0	0.9184	deoxyhypusine biosynthetic process from spermidine
50982	5	0	0	0	1	1	1	0	0	0.9789	detection of mechanical stimulus
50976	1	0	0	0	1	1	1	0	0	0.9184	detection of mechanical stimulus involved in sensory perception of touch
50975	3	0	0	0	1	1	1	0	0	0.9976	sensory perception of touch
50974	2	0	0	0	1	1	1	0	0	0.9842	detection of mechanical stimulus involved in sensory perception
50954	23	0	0	0	1	1	1	0	0	0.9551	sensory perception of mechanical stimulus
50953	1	0	0	0	1	1	1	0	0	0.9184	sensory perception of light stimulus
50931	1	0	0	0	1	1	1	0	0	0.9184	pigment cell differentiation
50921	1	0	0	0	1	1	1	0	0	0.9184	positive regulation of chemotaxis
50919	10	0	0	0	1	1	1	0	0	0.9884	negative chemotaxis
50918	3	0	0	0	1	1	1	0	0	0.9976	positive chemotaxis
50913	3	0	0	0	1	1	1	0	0	0.9976	sensory perception of bitter taste
50911	265	0	0	0	1	1	1	0	0	0.9857	detection of chemical stimulus involved in sensory perception of smell
50909	7	0	0	0	1	1	1	0	0	0.9979	sensory perception of taste
50907	268	0	0	0	1	1	1	0	0	0.9994	detection of chemical stimulus involved in sensory perception
50906	274	0	0	0	1	1	1	0	0	0.9616	detection of stimulus involved in sensory perception
50905	1	0	0	0	1	1	1	0	0	0.9184	neuromuscular process
50892	1	0	0	0	1	1	1	0	0	0.9184	intestinal absorption
50891	3	0	0	0	1	1	1	0	0	0.9976	multicellular organismal water homeostasis
50890	53	0	0	0	1	1	1	0	0	0.9948	cognition
50880	1	0	0	0	1	1	1	0	0	0.9184	regulation of blood vessel size
50879	2	0	0	0	1	1	1	0	0	0.9842	multicellular organismal movement
50878	4	0	0	0	1	1	1	0	0	0.9412	regulation of body fluid levels
50877	545	0	0	0	1	1	1	0	0	0.9735	neurological system process
50848	1	0	0	0	1	1	1	0	0	0.9184	regulation of calcium-mediated signaling
50830	36	0	0	0	1	1	1	0	0	0.9427	defense response to Gram-positive bacterium
50821	6	0	0	0	1	1	1	0	0	0.9891	protein stabilization
50817	1	0	0	0	1	1	1	0	0	0.9184	coagulation
50807	17	0	0	0	1	1	1	0	0	0.9711	regulation of synapse organization
50805	4	0	0	0	1	1	1	0	0	0.9412	negative regulation of synaptic transmission
50801	98	0	0	0	1	1	1	0	0	0.9707	ion homeostasis
50796	2	0	0	0	1	1	1	0	0	0.9842	regulation of insulin secretion
50795	99	0	0	0	1	1	1	0	0	0.9496	regulation of behavior
50787	1	0	0	0	1	1	1	0	0	0.9184	detoxification of mercury ion
50779	4	0	0	0	1	1	1	0	0	0.9412	RNA destabilization
50778	8	0	0	0	1	1	1	0	0	0.9803	positive regulation of immune response
50777	3	0	0	0	1	1	1	0	0	0.9976	negative regulation of immune response
50776	11	0	0	0	1	1	1	0	0	0.9526	regulation of immune response
50773	5	0	0	0	1	1	1	0	0	0.9789	regulation of dendrite development
50772	8	0	0	0	1	1	1	0	0	0.9803	positive regulation of axonogenesis
50769	10	0	0	0	1	1	1	0	0	0.9884	positive regulation of neurogenesis
50766	8	0	0	0	1	1	1	0	0	0.9803	positive regulation of phagocytosis
50765	7	0	0	0	1	1	1	0	0	0.9979	negative regulation of phagocytosis
50764	19	0	0	0	1	1	1	0	0	0.9669	regulation of phagocytosis
50732	2	0	0	0	1	1	1	0	0	0.9842	negative regulation of peptidyl-tyrosine phosphorylation
50731	1	0	0	0	1	1	1	0	0	0.9184	positive regulation of peptidyl-tyrosine phosphorylation
50730	3	0	0	0	1	1	1	0	0	0.9976	regulation of peptidyl-tyrosine phosphorylation
50714	4	0	0	0	1	1	1	0	0	0.9412	positive regulation of protein secretion
50709	1	0	0	0	1	1	1	0	0	0.9184	negative regulation of protein secretion
50708	10	0	0	0	1	1	1	0	0	0.9884	regulation of protein secretion
50686	1	0	0	0	1	1	1	0	0	0.9184	negative regulation of mRNA processing
50685	2	0	0	0	1	1	1	0	0	0.9842	positive regulation of mRNA processing
50684	18	0	0	0	1	1	1	0	0	0.964	regulation of mRNA processing
50679	1	0	0	0	1	1	1	0	0	0.9184	positive regulation of epithelial cell proliferation
50678	1	0	0	0	1	1	1	0	0	0.9184	regulation of epithelial cell proliferation
50673	1	0	0	0	1	1	1	0	0	0.9184	epithelial cell proliferation
50654	11	0	0	0	1	1	1	0	0	0.9526	chondroitin sulfate proteoglycan metabolic process
50650	10	0	0	0	1	1	1	0	0	0.9884	chondroitin sulfate proteoglycan biosynthetic process
50435	3	0	0	0	1	1	1	0	0	0.9976	beta-amyloid metabolic process
50428	1	0	0	0	1	1	1	0	0	0.9184	3'-phosphoadenosine 5'-phosphosulfate biosynthetic process
50427	1	0	0	0	1	1	1	0	0	0.9184	3'-phosphoadenosine 5'-phosphosulfate metabolic process
50000	10	0	0	0	1	1	1	0	0	0.9884	chromosome localization
48878	136	0	0	0	1	1	1	0	0	0.9699	chemical homeostasis
48871	10	0	0	0	1	1	1	0	0	0.9884	multicellular organismal homeostasis
48867	2	0	0	0	1	1	1	0	0	0.9842	stem cell fate determination
48866	4	0	0	0	1	1	1	0	0	0.9412	stem cell fate specification
48865	6	0	0	0	1	1	1	0	0	0.9891	stem cell fate commitment
48864	6	0	0	0	1	1	1	0	0	0.9891	stem cell development
48863	14	0	0	0	1	1	1	0	0	0.9565	stem cell differentiation
48859	1	0	0	0	1	1	1	0	0	0.9184	formation of anatomical boundary
48815	3	0	0	0	1	1	1	0	0	0.9976	hermaphrodite genitalia morphogenesis
48814	5	0	0	0	1	1	1	0	0	0.9789	regulation of dendrite morphogenesis
48813	9	0	0	0	1	1	1	0	0	0.9942	dendrite morphogenesis
48808	3	0	0	0	1	1	1	0	0	0.9976	male genitalia morphogenesis
48806	759	0	0	0	1	1	1	0	0	0.9735	genitalia development
48762	4	0	0	0	1	1	1	0	0	0.9412	mesenchymal cell differentiation
48755	2	0	0	0	1	1	1	0	0	0.9842	branching morphogenesis of a nerve
48753	1	0	0	0	1	1	1	0	0	0.9184	pigment granule organization
48747	5	0	0	0	1	1	1	0	0	0.9789	muscle fiber development
48739	3	0	0	0	1	1	1	0	0	0.9976	cardiac muscle fiber development
48738	5	0	0	0	1	1	1	0	0	0.9789	cardiac muscle tissue development
48730	8	0	0	0	1	1	1	0	0	0.9803	epidermis morphogenesis
48729	61	0	0	0	1	1	1	0	0	0.9912	tissue morphogenesis
48709	1	0	0	0	1	1	1	0	0	0.9184	oligodendrocyte differentiation
48692	2	0	0	0	1	1	1	0	0	0.9842	negative regulation of axon extension involved in regeneration
48691	3	0	0	0	1	1	1	0	0	0.9976	positive regulation of axon extension involved in regeneration
[truncated: 3,189 more rows]

## Sheet: Biological Process SNPs
GO ID	Category	Gene	Change	Gene ID
GO:0008150	biological_process	F10F2.2	changed	F10F2.2|WBGENE00008654
GO:0008150	biological_process	Y54F10BM.3	changed	WBGENE00021858|Y54F10BM.3
GO:0008150	biological_process	PPFR-1	changed	WBGENE00008878|ppfr-1
GO:0008150	biological_process	Y106G6D.4	changed	WBGENE00013701|Y106G6D.4
GO:0008150	biological_process	Y34B4A.2	changed	WBGENE00021319|Y34B4A.2
GO:0008150	biological_process	PPH-4.1	changed	WBGENE00004085|pph-4.1
GO:0008150	biological_process	SYD-2	changed	WBGENE00006364|syd-2
GO:0008150	biological_process	Y41E3.7	changed	WBGENE00012765|Y41E3.7
GO:0008150	biological_process	TIR-1	changed	WBGENE00006575|tir-1
GO:0008150	biological_process	FER-1	changed	WBGENE00001414|fer-1
GO:0008150	biological_process	T19D12.1	changed	T19D12.1|WBGENE00020576
GO:0008150	biological_process	Y82E9BR.2	changed	WBGENE00022335|Y82E9BR.2
GO:0008150	biological_process	TWK-17	changed	WBGENE00006671|twk-17
GO:0008150	biological_process	CED-12	changed	WBGENE00000426|ced-12
GO:0008150	biological_process	ATIC-1	changed	WBGENE00016957|atic-1
GO:0008150	biological_process	ABHD-11.2	changed	WBGENE00011029|abhd-11.2
GO:0008150	biological_process	AC3.12	changed	AC3.12|WBGENE00077503
GO:0008150	biological_process	NLP-20	changed	WBGENE00003758|nlp-20
GO:0008150	biological_process	MATH-33	changed	WBGENE00010406|math-33
GO:0008150	biological_process	LGC-29	changed	WBGENE00044528|lgc-29
GO:0008150	biological_process	F26F2.7	changed	F26F2.7|WBGENE00009172
GO:0008150	biological_process	FKH-9	changed	WBGENE00001441|fkh-9
GO:0008150	biological_process	SET-29	changed	WBGENE00022371|set-29
GO:0008150	biological_process	TTN-1	changed	WBGENE00006436|ttn-1
GO:0008150	biological_process	TAG-80	changed	WBGENE00018468|tag-80
GO:0008150	biological_process	SLT-1	changed	WBGENE00004854|slt-1
GO:0008150	biological_process	C17H12.3	changed	C17H12.3|WBGENE00015929
GO:0008150	biological_process	MRP-7	changed	WBGENE00003413|mrp-7
GO:0008150	biological_process	Y16B4A.2	changed	WBGENE00012445|Y16B4A.2
GO:0008150	biological_process	K07C5.2	changed	K07C5.2|WBGENE00010625
GO:0008150	biological_process	OAC-43	changed	WBGENE00011653|oac-43
GO:0071840	cellular_component_organization_or_biogenesis	TTN-1	changed	WBGENE00006436|ttn-1
GO:0071840	cellular_component_organization_or_biogenesis	SYD-2	changed	WBGENE00006364|syd-2
GO:0071840	cellular_component_organization_or_biogenesis	SLT-1	changed	WBGENE00004854|slt-1
GO:0071840	cellular_component_organization_or_biogenesis	TIR-1	changed	WBGENE00006575|tir-1
GO:0071840	cellular_component_organization_or_biogenesis	FER-1	changed	WBGENE00001414|fer-1
GO:0071840	cellular_component_organization_or_biogenesis	PPFR-1	changed	WBGENE00008878|ppfr-1
GO:0071840	cellular_component_organization_or_biogenesis	MATH-33	changed	WBGENE00010406|math-33
GO:0071840	cellular_component_organization_or_biogenesis	CED-12	changed	WBGENE00000426|ced-12
GO:0071840	cellular_component_organization_or_biogenesis	Y34B4A.2	changed	WBGENE00021319|Y34B4A.2
GO:0071840	cellular_component_organization_or_biogenesis	PPH-4.1	changed	WBGENE00004085|pph-4.1
GO:0071840	cellular_component_organization_or_biogenesis	SET-29	changed	WBGENE00022371|set-29
GO:0065007	biological_regulation	SYD-2	changed	WBGENE00006364|syd-2
GO:0065007	biological_regulation	TIR-1	changed	WBGENE00006575|tir-1
GO:0065007	biological_regulation	SLT-1	changed	WBGENE00004854|slt-1
GO:0065007	biological_regulation	AC3.12	changed	AC3.12|WBGENE00077503
GO:0065007	biological_regulation	NLP-20	changed	WBGENE00003758|nlp-20
GO:0065007	biological_regulation	PPFR-1	changed	WBGENE00008878|ppfr-1
GO:0065007	biological_regulation	MATH-33	changed	WBGENE00010406|math-33
GO:0065007	biological_regulation	TWK-17	changed	WBGENE00006671|twk-17
GO:0065007	biological_regulation	Y34B4A.2	changed	WBGENE00021319|Y34B4A.2
GO:0065007	biological_regulation	CED-12	changed	WBGENE00000426|ced-12
GO:0065007	biological_regulation	FKH-9	changed	WBGENE00001441|fkh-9
GO:0051704	multi-organism_process	TIR-1	changed	WBGENE00006575|tir-1
GO:0051704	multi-organism_process	FER-1	changed	WBGENE00001414|fer-1
GO:0051179	localization	SYD-2	changed	WBGENE00006364|syd-2
GO:0051179	localization	Y41E3.7	changed	WBGENE00012765|Y41E3.7
GO:0051179	localization	TIR-1	changed	WBGENE00006575|tir-1
GO:0051179	localization	SLT-1	changed	WBGENE00004854|slt-1
GO:0051179	localization	FER-1	changed	WBGENE00001414|fer-1
GO:0051179	localization	MRP-7	changed	WBGENE00003413|mrp-7
GO:0051179	localization	Y82E9BR.2	changed	WBGENE00022335|Y82E9BR.2
GO:0051179	localization	TWK-17	changed	WBGENE00006671|twk-17
GO:0051179	localization	CED-12	changed	WBGENE00000426|ced-12
GO:0051179	localization	Y34B4A.2	changed	WBGENE00021319|Y34B4A.2
GO:0051179	localization	LGC-29	changed	WBGENE00044528|lgc-29
GO:0050896	response_to_stimulus	TIR-1	changed	WBGENE00006575|tir-1
GO:0050896	response_to_stimulus	SLT-1	changed	WBGENE00004854|slt-1
GO:0050896	response_to_stimulus	AC3.12	changed	AC3.12|WBGENE00077503
GO:0050896	response_to_stimulus	NLP-20	changed	WBGENE00003758|nlp-20
GO:0050896	response_to_stimulus	MRP-7	changed	WBGENE00003413|mrp-7
GO:0044699	single-organism_process	AC3.12	changed	AC3.12|WBGENE00077503
GO:0044699	single-organism_process	NLP-20	changed	WBGENE00003758|nlp-20
GO:0044699	single-organism_process	F10F2.2	changed	F10F2.2|WBGENE00008654
GO:0044699	single-organism_process	PPFR-1	changed	WBGENE00008878|ppfr-1
GO:0044699	single-organism_process	MATH-33	changed	WBGENE00010406|math-33
GO:0044699	single-organism_process	Y34B4A.2	changed	WBGENE00021319|Y34B4A.2
GO:0044699	single-organism_process	F26F2.7	changed	F26F2.7|WBGENE00009172
GO:0044699	single-organism_process	LGC-29	changed	WBGENE00044528|lgc-29
GO:0044699	single-organism_process	PPH-4.1	changed	WBGENE00004085|pph-4.1
GO:0044699	single-organism_process	FKH-9	changed	WBGENE00001441|fkh-9
GO:0044699	single-organism_process	TTN-1	changed	WBGENE00006436|ttn-1
GO:0044699	single-organism_process	SYD-2	changed	WBGENE00006364|syd-2
GO:0044699	single-organism_process	TIR-1	changed	WBGENE00006575|tir-1
GO:0044699	single-organism_process	SLT-1	changed	WBGENE00004854|slt-1
GO:0044699	single-organism_process	FER-1	changed	WBGENE00001414|fer-1
GO:0044699	single-organism_process	T19D12.1	changed	T19D12.1|WBGENE00020576
GO:0044699	single-organism_process	MRP-7	changed	WBGENE00003413|mrp-7
GO:0044699	single-organism_process	Y82E9BR.2	changed	WBGENE00022335|Y82E9BR.2
GO:0044699	single-organism_process	TWK-17	changed	WBGENE00006671|twk-17
GO:0044699	single-organism_process	CED-12	changed	WBGENE00000426|ced-12
GO:0044699	single-organism_process	ATIC-1	changed	WBGENE00016957|atic-1
GO:0044699	single-organism_process	K07C5.2	changed	K07C5.2|WBGENE00010625
GO:0040011	locomotion	TAG-80	changed	WBGENE00018468|tag-80
GO:0040011	locomotion	SYD-2	changed	WBGENE00006364|syd-2
GO:0040011	locomotion	SLT-1	changed	WBGENE00004854|slt-1
GO:0040011	locomotion	TIR-1	changed	WBGENE00006575|tir-1
GO:0040011	locomotion	FER-1	changed	WBGENE00001414|fer-1
GO:0040011	locomotion	CED-12	changed	WBGENE00000426|ced-12
GO:0040007	growth	SLT-1	changed	WBGENE00004854|slt-1
GO:0040007	growth	TIR-1	changed	WBGENE00006575|tir-1
GO:0040007	growth	MATH-33	changed	WBGENE00010406|math-33
GO:0032502	developmental_process	TTN-1	changed	WBGENE00006436|ttn-1
GO:0032502	developmental_process	SLT-1	changed	WBGENE00004854|slt-1
GO:0032502	developmental_process	TIR-1	changed	WBGENE00006575|tir-1
GO:0032502	developmental_process	NLP-20	changed	WBGENE00003758|nlp-20
GO:0032502	developmental_process	FER-1	changed	WBGENE00001414|fer-1
GO:0032502	developmental_process	T19D12.1	changed	T19D12.1|WBGENE00020576
GO:0032502	developmental_process	PPFR-1	changed	WBGENE00008878|ppfr-1
GO:0032502	developmental_process	MATH-33	changed	WBGENE00010406|math-33
GO:0032502	developmental_process	CED-12	changed	WBGENE00000426|ced-12
GO:0032502	developmental_process	F26F2.7	changed	F26F2.7|WBGENE00009172
GO:0032502	developmental_process	FKH-9	changed	WBGENE00001441|fkh-9
GO:0032502	developmental_process	PPH-4.1	changed	WBGENE00004085|pph-4.1
GO:0032501	multicellular_organismal_process	TTN-1	changed	WBGENE00006436|ttn-1
GO:0032501	multicellular_organismal_process	SYD-2	changed	WBGENE00006364|syd-2
GO:0032501	multicellular_organismal_process	TIR-1	changed	WBGENE00006575|tir-1
GO:0032501	multicellular_organismal_process	SLT-1	changed	WBGENE00004854|slt-1
GO:0032501	multicellular_organismal_process	FER-1	changed	WBGENE00001414|fer-1
GO:0032501	multicellular_organismal_process	NLP-20	changed	WBGENE00003758|nlp-20
GO:0032501	multicellular_organismal_process	T19D12.1	changed	T19D12.1|WBGENE00020576
GO:0032501	multicellular_organismal_process	PPFR-1	changed	WBGENE00008878|ppfr-1
GO:0032501	multicellular_organismal_process	MATH-33	changed	WBGENE00010406|math-33
GO:0032501	multicellular_organismal_process	CED-12	changed	WBGENE00000426|ced-12
GO:0032501	multicellular_organismal_process	F26F2.7	changed	F26F2.7|WBGENE00009172
GO:0032501	multicellular_organismal_process	PPH-4.1	changed	WBGENE00004085|pph-4.1
GO:0023052	signaling	SYD-2	changed	WBGENE00006364|syd-2
GO:0023052	signaling	TIR-1	changed	WBGENE00006575|tir-1
GO:0023052	signaling	AC3.12	changed	AC3.12|WBGENE00077503
GO:0023052	signaling	SLT-1	changed	WBGENE00004854|slt-1
GO:0023052	signaling	NLP-20	changed	WBGENE00003758|nlp-20
GO:0009987	cellular_process	AC3.12	changed	AC3.12|WBGENE00077503
GO:0009987	cellular_process	NLP-20	changed	WBGENE00003758|nlp-20
GO:0009987	cellular_process	F10F2.2	changed	F10F2.2|WBGENE00008654
GO:0009987	cellular_process	Y54F10BM.3	changed	WBGENE00021858|Y54F10BM.3
GO:0009987	cellular_process	PPFR-1	changed	WBGENE00008878|ppfr-1
GO:0009987	cellular_process	Y106G6D.4	changed	WBGENE00013701|Y106G6D.4
GO:0009987	cellular_process	MATH-33	changed	WBGENE00010406|math-33
GO:0009987	cellular_process	Y34B4A.2	changed	WBGENE00021319|Y34B4A.2
GO:0009987	cellular_process	LGC-29	changed	WBGENE00044528|lgc-29
GO:0009987	cellular_process	PPH-4.1	changed	WBGENE00004085|pph-4.1
GO:0009987	cellular_process	FKH-9	changed	WBGENE00001441|fkh-9
GO:0009987	cellular_process	SET-29	changed	WBGENE00022371|set-29
GO:0009987	cellular_process	TTN-1	changed	WBGENE00006436|ttn-1
GO:0009987	cellular_process	SYD-2	changed	WBGENE00006364|syd-2
GO:0009987	cellular_process	SLT-1	changed	WBGENE00004854|slt-1
GO:0009987	cellular_process	TIR-1	changed	WBGENE00006575|tir-1
GO:0009987	cellular_process	FER-1	changed	WBGENE00001414|fer-1
GO:0009987	cellular_process	C17H12.3	changed	C17H12.3|WBGENE00015929
GO:0009987	cellular_process	MRP-7	changed	WBGENE00003413|mrp-7
GO:0009987	cellular_process	Y82E9BR.2	changed	WBGENE00022335|Y82E9BR.2
GO:0009987	cellular_process	TWK-17	changed	WBGENE00006671|twk-17
GO:0009987	cellular_process	CED-12	changed	WBGENE00000426|ced-12
GO:0009987	cellular_process	ATIC-1	changed	WBGENE00016957|atic-1
GO:0009987	cellular_process	Y16B4A.2	changed	WBGENE00012445|Y16B4A.2
GO:0008152	metabolic_process	F10F2.2	changed	F10F2.2|WBGENE00008654
GO:0008152	metabolic_process	Y54F10BM.3	changed	WBGENE00021858|Y54F10BM.3
GO:0008152	metabolic_process	PPFR-1	changed	WBGENE00008878|ppfr-1
GO:0008152	metabolic_process	Y106G6D.4	changed	WBGENE00013701|Y106G6D.4
GO:0008152	metabolic_process	MATH-33	changed	WBGENE00010406|math-33
GO:0008152	metabolic_process	Y34B4A.2	changed	WBGENE00021319|Y34B4A.2
GO:0008152	metabolic_process	FKH-9	changed	WBGENE00001441|fkh-9
GO:0008152	metabolic_process	PPH-4.1	changed	WBGENE00004085|pph-4.1
GO:0008152	metabolic_process	SET-29	changed	WBGENE00022371|set-29
GO:0008152	metabolic_process	TTN-1	changed	WBGENE00006436|ttn-1
GO:0008152	metabolic_process	TIR-1	changed	WBGENE00006575|tir-1
GO:0008152	metabolic_process	C17H12.3	changed	C17H12.3|WBGENE00015929
GO:0008152	metabolic_process	MRP-7	changed	WBGENE00003413|mrp-7
GO:0008152	metabolic_process	Y82E9BR.2	changed	WBGENE00022335|Y82E9BR.2
GO:0008152	metabolic_process	ATIC-1	changed	WBGENE00016957|atic-1
GO:0008152	metabolic_process	ABHD-11.2	changed	WBGENE00011029|abhd-11.2
GO:0008152	metabolic_process	Y16B4A.2	changed	WBGENE00012445|Y16B4A.2
GO:0008152	metabolic_process	K07C5.2	changed	K07C5.2|WBGENE00010625
GO:0008152	metabolic_process	OAC-43	changed	WBGENE00011653|oac-43
GO:0007610	behavior	SYD-2	changed	WBGENE00006364|syd-2
GO:0007610	behavior	PPH-4.1	changed	WBGENE00004085|pph-4.1
GO:0002376	immune_system_process	TIR-1	changed	WBGENE00006575|tir-1
GO:0000003	reproduction	SYD-2	changed	WBGENE00006364|syd-2
GO:0000003	reproduction	TIR-1	changed	WBGENE00006575|tir-1
GO:0000003	reproduction	FER-1	changed	WBGENE00001414|fer-1
GO:0000003	reproduction	PPFR-1	changed	WBGENE00008878|ppfr-1
GO:0000003	reproduction	CED-12	changed	WBGENE00000426|ced-12
GO:0000003	reproduction	ATIC-1	changed	WBGENE00016957|atic-1
GO:0000003	reproduction	PPH-4.1	changed	WBGENE00004085|pph-4.1
GO:0044085	cellular_component_biogenesis	TTN-1	changed	WBGENE00006436|ttn-1
GO:0044085	cellular_component_biogenesis	MATH-33	changed	WBGENE00010406|math-33
GO:0044085	cellular_component_biogenesis	Y34B4A.2	changed	WBGENE00021319|Y34B4A.2
GO:0044085	cellular_component_biogenesis	SET-29	changed	WBGENE00022371|set-29
GO:0016043	cellular_component_organization	TTN-1	changed	WBGENE00006436|ttn-1
GO:0016043	cellular_component_organization	SYD-2	changed	WBGENE00006364|syd-2
GO:0016043	cellular_component_organization	SLT-1	changed	WBGENE00004854|slt-1
GO:0016043	cellular_component_organization	TIR-1	changed	WBGENE00006575|tir-1
GO:0016043	cellular_component_organization	FER-1	changed	WBGENE00001414|fer-1
GO:0016043	cellular_component_organization	PPFR-1	changed	WBGENE00008878|ppfr-1
GO:0016043	cellular_component_organization	MATH-33	changed	WBGENE00010406|math-33
GO:0016043	cellular_component_organization	CED-12	changed	WBGENE00000426|ced-12
GO:0016043	cellular_component_organization	Y34B4A.2	changed	WBGENE00021319|Y34B4A.2
GO:0016043	cellular_component_organization	PPH-4.1	changed	WBGENE00004085|pph-4.1
GO:0065009	regulation_of_molecular_function	TIR-1	changed	WBGENE00006575|tir-1
GO:0065009	regulation_of_molecular_function	CED-12	changed	WBGENE00000426|ced-12
GO:0065008	regulation_of_biological_quality	SYD-2	changed	WBGENE00006364|syd-2
GO:0065008	regulation_of_biological_quality	SLT-1	changed	WBGENE00004854|slt-1
GO:0065008	regulation_of_biological_quality	TWK-17	changed	WBGENE00006671|twk-17
GO:0050789	regulation_of_biological_process	SYD-2	changed	WBGENE00006364|syd-2
GO:0050789	regulation_of_biological_process	TIR-1	changed	WBGENE00006575|tir-1
GO:0050789	regulation_of_biological_process	SLT-1	changed	WBGENE00004854|slt-1
GO:0050789	regulation_of_biological_process	AC3.12	changed	AC3.12|WBGENE00077503
GO:0050789	regulation_of_biological_process	NLP-20	changed	WBGENE00003758|nlp-20
GO:0050789	regulation_of_biological_process	PPFR-1	changed	WBGENE00008878|ppfr-1
GO:0050789	regulation_of_biological_process	MATH-33	changed	WBGENE00010406|math-33
GO:0050789	regulation_of_biological_process	Y34B4A.2	changed	WBGENE00021319|Y34B4A.2
GO:0050789	regulation_of_biological_process	CED-12	changed	WBGENE00000426|ced-12
GO:0050789	regulation_of_biological_process	FKH-9	changed	WBGENE00001441|fkh-9
GO:1902578	single-organism_localization	SYD-2	changed	WBGENE00006364|syd-2
GO:1902578	single-organism_localization	MRP-7	changed	WBGENE00003413|mrp-7
GO:1902578	single-organism_localization	Y82E9BR.2	changed	WBGENE00022335|Y82E9BR.2
GO:1902578	single-organism_localization	TWK-17	changed	WBGENE00006671|twk-17
GO:1902578	single-organism_localization	CED-12	changed	WBGENE00000426|ced-12
GO:1902578	single-organism_localization	LGC-29	changed	WBGENE00044528|lgc-29
GO:0051674	localization_of_cell	SLT-1	changed	WBGENE00004854|slt-1
GO:0051674	localization_of_cell	FER-1	changed	WBGENE00001414|fer-1
GO:0051674	localization_of_cell	CED-12	changed	WBGENE00000426|ced-12
GO:0051641	cellular_localization	SYD-2	changed	WBGENE00006364|syd-2
GO:0051641	cellular_localization	Y82E9BR.2	changed	WBGENE00022335|Y82E9BR.2
GO:0051234	establishment_of_localization	SYD-2	changed	WBGENE00006364|syd-2
GO:0051234	establishment_of_localization	Y41E3.7	changed	WBGENE00012765|Y41E3.7
GO:0051234	establishment_of_localization	TIR-1	changed	WBGENE00006575|tir-1
GO:0051234	establishment_of_localization	MRP-7	changed	WBGENE00003413|mrp-7
GO:0051234	establishment_of_localization	Y82E9BR.2	changed	WBGENE00022335|Y82E9BR.2
GO:0051234	establishment_of_localization	TWK-17	changed	WBGENE00006671|twk-17
GO:0051234	establishment_of_localization	CED-12	changed	WBGENE00000426|ced-12
GO:0051234	establishment_of_localization	Y34B4A.2	changed	WBGENE00021319|Y34B4A.2
GO:0051234	establishment_of_localization	LGC-29	changed	WBGENE00044528|lgc-29
GO:0033036	macromolecule_localization	SYD-2	changed	WBGENE00006364|syd-2
GO:0033036	macromolecule_localization	TIR-1	changed	WBGENE00006575|tir-1
GO:0033036	macromolecule_localization	Y82E9BR.2	changed	WBGENE00022335|Y82E9BR.2
GO:0042221	response_to_chemical	SLT-1	changed	WBGENE00004854|slt-1
GO:0042221	response_to_chemical	TIR-1	changed	WBGENE00006575|tir-1
GO:0042221	response_to_chemical	MRP-7	changed	WBGENE00003413|mrp-7
GO:0009607	response_to_biotic_stimulus	TIR-1	changed	WBGENE00006575|tir-1
GO:0009605	response_to_external_stimulus	TIR-1	changed	WBGENE00006575|tir-1
GO:0009605	response_to_external_stimulus	SLT-1	changed	WBGENE00004854|slt-1
GO:0006950	response_to_stress	TIR-1	changed	WBGENE00006575|tir-1
GO:0044767	single-organism_developmental_process	TTN-1	changed	WBGENE00006436|ttn-1
GO:0044767	single-organism_developmental_process	TIR-1	changed	WBGENE00006575|tir-1
GO:0044767	single-organism_developmental_process	SLT-1	changed	WBGENE00004854|slt-1
GO:0044767	single-organism_developmental_process	NLP-20	changed	WBGENE00003758|nlp-20
GO:0044767	single-organism_developmental_process	FER-1	changed	WBGENE00001414|fer-1
GO:0044767	single-organism_developmental_process	T19D12.1	changed	T19D12.1|WBGENE00020576
GO:0044767	single-organism_developmental_process	PPFR-1	changed	WBGENE00008878|ppfr-1
GO:0044767	single-organism_developmental_process	MATH-33	changed	WBGENE00010406|math-33
GO:0044767	single-organism_developmental_process	CED-12	changed	WBGENE00000426|ced-12
GO:0044767	single-organism_developmental_process	F26F2.7	changed	F26F2.7|WBGENE00009172
GO:0044767	single-organism_developmental_process	PPH-4.1	changed	WBGENE00004085|pph-4.1
GO:0044767	single-organism_developmental_process	FKH-9	changed	WBGENE00001441|fkh-9
GO:0044710	single-organism_metabolic_process	TIR-1	changed	WBGENE00006575|tir-1
GO:0044710	single-organism_metabolic_process	F10F2.2	changed	F10F2.2|WBGENE00008654
GO:0044710	single-organism_metabolic_process	ATIC-1	changed	WBGENE00016957|atic-1
GO:0044710	single-organism_metabolic_process	K07C5.2	changed	K07C5.2|WBGENE00010625
GO:0048856	anatomical_structure_development	TTN-1	changed	WBGENE00006436|ttn-1
GO:0048856	anatomical_structure_development	TIR-1	changed	WBGENE00006575|tir-1
GO:0048856	anatomical_structure_development	SLT-1	changed	WBGENE00004854|slt-1
GO:0048856	anatomical_structure_development	NLP-20	changed	WBGENE00003758|nlp-20
GO:0048856	anatomical_structure_development	FER-1	changed	WBGENE00001414|fer-1
GO:0048856	anatomical_structure_development	T19D12.1	changed	T19D12.1|WBGENE00020576
GO:0048856	anatomical_structure_development	PPFR-1	changed	WBGENE00008878|ppfr-1
GO:0048856	anatomical_structure_development	MATH-33	changed	WBGENE00010406|math-33
GO:0048856	anatomical_structure_development	CED-12	changed	WBGENE00000426|ced-12
GO:0048856	anatomical_structure_development	F26F2.7	changed	F26F2.7|WBGENE00009172
GO:0048856	anatomical_structure_development	PPH-4.1	changed	WBGENE00004085|pph-4.1
GO:0048856	anatomical_structure_development	FKH-9	changed	WBGENE00001441|fkh-9
GO:0044707	single-multicellular_organism_process	TTN-1	changed	WBGENE00006436|ttn-1
GO:0044707	single-multicellular_organism_process	TIR-1	changed	WBGENE00006575|tir-1
GO:0044707	single-multicellular_organism_process	SLT-1	changed	WBGENE00004854|slt-1
GO:0044707	single-multicellular_organism_process	NLP-20	changed	WBGENE00003758|nlp-20
GO:0044707	single-multicellular_organism_process	FER-1	changed	WBGENE00001414|fer-1
GO:0044707	single-multicellular_organism_process	T19D12.1	changed	T19D12.1|WBGENE00020576
GO:0044707	single-multicellular_organism_process	PPFR-1	changed	WBGENE00008878|ppfr-1
GO:0044707	single-multicellular_organism_process	MATH-33	changed	WBGENE00010406|math-33
GO:0044707	single-multicellular_organism_process	CED-12	changed	WBGENE00000426|ced-12
GO:0044707	single-multicellular_organism_process	F26F2.7	changed	F26F2.7|WBGENE00009172
GO:0044707	single-multicellular_organism_process	PPH-4.1	changed	WBGENE00004085|pph-4.1
GO:0032504	multicellular_organism_reproduction	SYD-2	changed	WBGENE00006364|syd-2
GO:0032504	multicellular_organism_reproduction	FER-1	changed	WBGENE00001414|fer-1
GO:0032504	multicellular_organism_reproduction	PPH-4.1	changed	WBGENE00004085|pph-4.1
GO:0003008	system_process	TTN-1	changed	WBGENE00006436|ttn-1
GO:0044700	single_organism_signaling	SYD-2	changed	WBGENE00006364|syd-2
GO:0044700	single_organism_signaling	TIR-1	changed	WBGENE00006575|tir-1
GO:0044700	single_organism_signaling	AC3.12	changed	AC3.12|WBGENE00077503
GO:0044700	single_organism_signaling	SLT-1	changed	WBGENE00004854|slt-1
GO:0044700	single_organism_signaling	NLP-20	changed	WBGENE00003758|nlp-20
GO:0051716	cellular_response_to_stimulus	TIR-1	changed	WBGENE00006575|tir-1
GO:0051716	cellular_response_to_stimulus	AC3.12	changed	AC3.12|WBGENE00077503
GO:0051716	cellular_response_to_stimulus	SLT-1	changed	WBGENE00004854|slt-1
GO:0051716	cellular_response_to_stimulus	NLP-20	changed	WBGENE00003758|nlp-20
GO:0044763	single-organism_cellular_process	AC3.12	changed	AC3.12|WBGENE00077503
GO:0044763	single-organism_cellular_process	NLP-20	changed	WBGENE00003758|nlp-20
GO:0044763	single-organism_cellular_process	F10F2.2	changed	F10F2.2|WBGENE00008654
GO:0044763	single-organism_cellular_process	PPFR-1	changed	WBGENE00008878|ppfr-1
GO:0044763	single-organism_cellular_process	MATH-33	changed	WBGENE00010406|math-33
GO:0044763	single-organism_cellular_process	Y34B4A.2	changed	WBGENE00021319|Y34B4A.2
GO:0044763	single-organism_cellular_process	LGC-29	changed	WBGENE00044528|lgc-29
GO:0044763	single-organism_cellular_process	PPH-4.1	changed	WBGENE00004085|pph-4.1
GO:0044763	single-organism_cellular_process	FKH-9	changed	WBGENE00001441|fkh-9
GO:0044763	single-organism_cellular_process	TTN-1	changed	WBGENE00006436|ttn-1
GO:0044763	single-organism_cellular_process	SYD-2	changed	WBGENE00006364|syd-2
GO:0044763	single-organism_cellular_process	SLT-1	changed	WBGENE00004854|slt-1
GO:0044763	single-organism_cellular_process	TIR-1	changed	WBGENE00006575|tir-1
GO:0044763	single-organism_cellular_process	FER-1	changed	WBGENE00001414|fer-1
GO:0044763	single-organism_cellular_process	MRP-7	changed	WBGENE00003413|mrp-7
GO:0044763	single-organism_cellular_process	TWK-17	changed	WBGENE00006671|twk-17
GO:0044763	single-organism_cellular_process	CED-12	changed	WBGENE00000426|ced-12
GO:0044763	single-organism_cellular_process	ATIC-1	changed	WBGENE00016957|atic-1
GO:0044237	cellular_metabolic_process	F10F2.2	changed	F10F2.2|WBGENE00008654
GO:0044237	cellular_metabolic_process	Y54F10BM.3	changed	WBGENE00021858|Y54F10BM.3
GO:0044237	cellular_metabolic_process	PPFR-1	changed	WBGENE00008878|ppfr-1
GO:0044237	cellular_metabolic_process	Y106G6D.4	changed	WBGENE00013701|Y106G6D.4
GO:0044237	cellular_metabolic_process	MATH-33	changed	WBGENE00010406|math-33
GO:0044237	cellular_metabolic_process	Y34B4A.2	changed	WBGENE00021319|Y34B4A.2
GO:0044237	cellular_metabolic_process	FKH-9	changed	WBGENE00001441|fkh-9
GO:0044237	cellular_metabolic_process	PPH-4.1	changed	WBGENE00004085|pph-4.1
GO:0044237	cellular_metabolic_process	SET-29	changed	WBGENE00022371|set-29
GO:0044237	cellular_metabolic_process	TTN-1	changed	WBGENE00006436|ttn-1
GO:0044237	cellular_metabolic_process	TIR-1	changed	WBGENE00006575|tir-1
GO:0044237	cellular_metabolic_process	C17H12.3	changed	C17H12.3|WBGENE00015929
GO:0044237	cellular_metabolic_process	Y82E9BR.2	changed	WBGENE00022335|Y82E9BR.2
GO:0044237	cellular_metabolic_process	ATIC-1	changed	WBGENE00016957|atic-1
GO:0044237	cellular_metabolic_process	Y16B4A.2	changed	WBGENE00012445|Y16B4A.2
GO:0006914	autophagy	Y34B4A.2	changed	WBGENE00021319|Y34B4A.2
GO:0071704	organic_substance_metabolic_process	F10F2.2	changed	F10F2.2|WBGENE00008654
GO:0071704	organic_substance_metabolic_process	Y54F10BM.3	changed	WBGENE00021858|Y54F10BM.3
GO:0071704	organic_substance_metabolic_process	PPFR-1	changed	WBGENE00008878|ppfr-1
GO:0071704	organic_substance_metabolic_process	Y106G6D.4	changed	WBGENE00013701|Y106G6D.4
GO:0071704	organic_substance_metabolic_process	MATH-33	changed	WBGENE00010406|math-33
GO:0071704	organic_substance_metabolic_process	FKH-9	changed	WBGENE00001441|fkh-9
GO:0071704	organic_substance_metabolic_process	PPH-4.1	changed	WBGENE00004085|pph-4.1
GO:0071704	organic_substance_metabolic_process	SET-29	changed	WBGENE00022371|set-29
GO:0071704	organic_substance_metabolic_process	TTN-1	changed	WBGENE00006436|ttn-1
GO:0071704	organic_substance_metabolic_process	TIR-1	changed	WBGENE00006575|tir-1
GO:0071704	organic_substance_metabolic_process	C17H12.3	changed	C17H12.3|WBGENE00015929
GO:0071704	organic_substance_metabolic_process	Y82E9BR.2	changed	WBGENE00022335|Y82E9BR.2
GO:0071704	organic_substance_metabolic_process	ATIC-1	changed	WBGENE00016957|atic-1
GO:0071704	organic_substance_metabolic_process	Y16B4A.2	changed	WBGENE00012445|Y16B4A.2
GO:0044238	primary_metabolic_process	F10F2.2	changed	F10F2.2|WBGENE00008654
GO:0044238	primary_metabolic_process	Y54F10BM.3	changed	WBGENE00021858|Y54F10BM.3
GO:0044238	primary_metabolic_process	PPFR-1	changed	WBGENE00008878|ppfr-1
GO:0044238	primary_metabolic_process	Y106G6D.4	changed	WBGENE00013701|Y106G6D.4
GO:0044238	primary_metabolic_process	MATH-33	changed	WBGENE00010406|math-33
GO:0044238	primary_metabolic_process	FKH-9	changed	WBGENE00001441|fkh-9
GO:0044238	primary_metabolic_process	PPH-4.1	changed	WBGENE00004085|pph-4.1
GO:0044238	primary_metabolic_process	SET-29	changed	WBGENE00022371|set-29
GO:0044238	primary_metabolic_process	TTN-1	changed	WBGENE00006436|ttn-1
GO:0044238	primary_metabolic_process	TIR-1	changed	WBGENE00006575|tir-1
GO:0044238	primary_metabolic_process	C17H12.3	changed	C17H12.3|WBGENE00015929
GO:0044238	primary_metabolic_process	Y82E9BR.2	changed	WBGENE00022335|Y82E9BR.2
GO:0044238	primary_metabolic_process	ATIC-1	changed	WBGENE00016957|atic-1
GO:0044238	primary_metabolic_process	Y16B4A.2	changed	WBGENE00012445|Y16B4A.2
GO:0032259	methylation	SET-29	changed	WBGENE00022371|set-29
GO:0009058	biosynthetic_process	TIR-1	changed	WBGENE00006575|tir-1
GO:0009058	biosynthetic_process	F10F2.2	changed	F10F2.2|WBGENE00008654
GO:0009058	biosynthetic_process	ATIC-1	changed	WBGENE00016957|atic-1
GO:0009058	biosynthetic_process	FKH-9	changed	WBGENE00001441|fkh-9
GO:0009056	catabolic_process	Y34B4A.2	changed	WBGENE00021319|Y34B4A.2
GO:0009056	catabolic_process	Y16B4A.2	changed	WBGENE00012445|Y16B4A.2
GO:0006807	nitrogen_compound_metabolic_process	TIR-1	changed	WBGENE00006575|tir-1
GO:0006807	nitrogen_compound_metabolic_process	F10F2.2	changed	F10F2.2|WBGENE00008654
GO:0006807	nitrogen_compound_metabolic_process	Y82E9BR.2	changed	WBGENE00022335|Y82E9BR.2
GO:0006807	nitrogen_compound_metabolic_process	ATIC-1	changed	WBGENE00016957|atic-1
GO:0006807	nitrogen_compound_metabolic_process	FKH-9	changed	WBGENE00001441|fkh-9
GO:0007626	locomotory_behavior	SYD-2	changed	WBGENE00006364|syd-2
GO:0006955	immune_response	TIR-1	changed	WBGENE00006575|tir-1
GO:0022414	reproductive_process	SYD-2	changed	WBGENE00006364|syd-2
GO:0022414	reproductive_process	FER-1	changed	WBGENE00001414|fer-1
GO:0022414	reproductive_process	PPFR-1	changed	WBGENE00008878|ppfr-1
GO:0022414	reproductive_process	CED-12	changed	WBGENE00000426|ced-12
GO:0022414	reproductive_process	PPH-4.1	changed	WBGENE00004085|pph-4.1
GO:0022607	cellular_component_assembly	TTN-1	changed	WBGENE00006436|ttn-1
GO:0022607	cellular_component_assembly	MATH-33	changed	WBGENE00010406|math-33
GO:0022607	cellular_component_assembly	Y34B4A.2	changed	WBGENE00021319|Y34B4A.2
GO:0070271	protein_complex_biogenesis	TTN-1	changed	WBGENE00006436|ttn-1
GO:0070271	protein_complex_biogenesis	Y34B4A.2	changed	WBGENE00021319|Y34B4A.2
GO:0022613	ribonucleoprotein_complex_biogenesis	SET-29	changed	WBGENE00022371|set-29
GO:0061024	membrane_organization	SYD-2	changed	WBGENE00006364|syd-2
GO:0061024	membrane_organization	FER-1	changed	WBGENE00001414|fer-1
GO:0061024	membrane_organization	CED-12	changed	WBGENE00000426|ced-12
GO:0061024	membrane_organization	Y34B4A.2	changed	WBGENE00021319|Y34B4A.2
GO:0050808	synapse_organization	SYD-2	changed	WBGENE00006364|syd-2
GO:0043933	macromolecular_complex_subunit_organization	TTN-1	changed	WBGENE00006436|ttn-1
GO:0043933	macromolecular_complex_subunit_organization	PPFR-1	changed	WBGENE00008878|ppfr-1
GO:0043933	macromolecular_complex_subunit_organization	Y34B4A.2	changed	WBGENE00021319|Y34B4A.2
GO:0043933	macromolecular_complex_subunit_organization	CED-12	changed	WBGENE00000426|ced-12
GO:0043933	macromolecular_complex_subunit_organization	PPH-4.1	changed	WBGENE00004085|pph-4.1
GO:0034330	cell_junction_organization	MATH-33	changed	WBGENE00010406|math-33
GO:0030030	cell_projection_organization	SLT-1	changed	WBGENE00004854|slt-1
GO:0030030	cell_projection_organization	TIR-1	changed	WBGENE00006575|tir-1
GO:0030030	cell_projection_organization	FER-1	changed	WBGENE00001414|fer-1
GO:0010256	endomembrane_system_organization	FER-1	changed	WBGENE00001414|fer-1
GO:0006996	organelle_organization	TTN-1	changed	WBGENE00006436|ttn-1
GO:0006996	organelle_organization	PPFR-1	changed	WBGENE00008878|ppfr-1
GO:0006996	organelle_organization	CED-12	changed	WBGENE00000426|ced-12
GO:0006996	organelle_organization	Y34B4A.2	changed	WBGENE00021319|Y34B4A.2
GO:0006996	organelle_organization	PPH-4.1	changed	WBGENE00004085|pph-4.1
GO:0050790	regulation_of_catalytic_activity	TIR-1	changed	WBGENE00006575|tir-1
GO:0050790	regulation_of_catalytic_activity	CED-12	changed	WBGENE00000426|ced-12
GO:0044093	positive_regulation_of_molecular_function	TIR-1	changed	WBGENE00006575|tir-1
GO:0044093	positive_regulation_of_molecular_function	CED-12	changed	WBGENE00000426|ced-12
GO:0090066	regulation_of_anatomical_structure_size	SLT-1	changed	WBGENE00004854|slt-1
GO:0050803	regulation_of_synapse_structure_or_activity	SYD-2	changed	WBGENE00006364|syd-2
GO:0042391	regulation_of_membrane_potential	TWK-17	changed	WBGENE00006671|twk-17
GO:2000241	regulation_of_reproductive_process	PPFR-1	changed	WBGENE00008878|ppfr-1
GO:0051239	regulation_of_multicellular_organismal_process	SLT-1	changed	WBGENE00004854|slt-1
GO:0051239	regulation_of_multicellular_organismal_process	MATH-33	changed	WBGENE00010406|math-33
GO:0050794	regulation_of_cellular_process	SYD-2	changed	WBGENE00006364|syd-2
GO:0050794	regulation_of_cellular_process	AC3.12	changed	AC3.12|WBGENE00077503
GO:0050794	regulation_of_cellular_process	SLT-1	changed	WBGENE00004854|slt-1
GO:0050794	regulation_of_cellular_process	TIR-1	changed	WBGENE00006575|tir-1
GO:0050794	regulation_of_cellular_process	NLP-20	changed	WBGENE00003758|nlp-20
GO:0050794	regulation_of_cellular_process	PPFR-1	changed	WBGENE00008878|ppfr-1
GO:0050794	regulation_of_cellular_process	Y34B4A.2	changed	WBGENE00021319|Y34B4A.2
GO:0050794	regulation_of_cellular_process	CED-12	changed	WBGENE00000426|ced-12
GO:0050794	regulation_of_cellular_process	FKH-9	changed	WBGENE00001441|fkh-9
GO:0050793	regulation_of_developmental_process	SLT-1	changed	WBGENE00004854|slt-1
GO:0050793	regulation_of_developmental_process	MATH-33	changed	WBGENE00010406|math-33
GO:0048583	regulation_of_response_to_stimulus	TIR-1	changed	WBGENE00006575|tir-1
GO:0048583	regulation_of_response_to_stimulus	SLT-1	changed	WBGENE00004854|slt-1
GO:0048519	negative_regulation_of_biological_process	SLT-1	changed	WBGENE00004854|slt-1
GO:0048519	negative_regulation_of_biological_process	PPFR-1	changed	WBGENE00008878|ppfr-1
GO:0048518	positive_regulation_of_biological_process	SYD-2	changed	WBGENE00006364|syd-2
GO:0048518	positive_regulation_of_biological_process	TIR-1	changed	WBGENE00006575|tir-1
GO:0048518	positive_regulation_of_biological_process	MATH-33	changed	WBGENE00010406|math-33
GO:0048518	positive_regulation_of_biological_process	Y34B4A.2	changed	WBGENE00021319|Y34B4A.2
GO:0040012	regulation_of_locomotion	SLT-1	changed	WBGENE00004854|slt-1
GO:0040012	regulation_of_locomotion	CED-12	changed	WBGENE00000426|ced-12
GO:0040008	regulation_of_growth	SLT-1	changed	WBGENE00004854|slt-1
GO:0040008	regulation_of_growth	MATH-33	changed	WBGENE00010406|math-33
GO:0032879	regulation_of_localization	SYD-2	changed	WBGENE00006364|syd-2
GO:0032879	regulation_of_localization	SLT-1	changed	WBGENE00004854|slt-1
GO:0032879	regulation_of_localization	Y34B4A.2	changed	WBGENE00021319|Y34B4A.2
GO:0032879	regulation_of_localization	CED-12	changed	WBGENE00000426|ced-12
GO:0023051	regulation_of_signaling	SYD-2	changed	WBGENE00006364|syd-2
GO:0023051	regulation_of_signaling	TIR-1	changed	WBGENE00006575|tir-1
GO:0019222	regulation_of_metabolic_process	TIR-1	changed	WBGENE00006575|tir-1
GO:0019222	regulation_of_metabolic_process	Y34B4A.2	changed	WBGENE00021319|Y34B4A.2
GO:0019222	regulation_of_metabolic_process	FKH-9	changed	WBGENE00001441|fkh-9
GO:1902580	single-organism_cellular_localization	SYD-2	changed	WBGENE00006364|syd-2
GO:0071166	ribonucleoprotein_complex_localization	Y82E9BR.2	changed	WBGENE00022335|Y82E9BR.2
GO:0051668	localization_within_membrane	SYD-2	changed	WBGENE00006364|syd-2
GO:0051640	organelle_localization	SYD-2	changed	WBGENE00006364|syd-2
GO:0051649	establishment_of_localization_in_cell	SYD-2	changed	WBGENE00006364|syd-2
GO:0051649	establishment_of_localization_in_cell	Y82E9BR.2	changed	WBGENE00022335|Y82E9BR.2
GO:0006810	transport	SYD-2	changed	WBGENE00006364|syd-2
GO:0006810	transport	Y41E3.7	changed	WBGENE00012765|Y41E3.7
GO:0006810	transport	TIR-1	changed	WBGENE00006575|tir-1
GO:0006810	transport	MRP-7	changed	WBGENE00003413|mrp-7
GO:0006810	transport	Y82E9BR.2	changed	WBGENE00022335|Y82E9BR.2
GO:0006810	transport	TWK-17	changed	WBGENE00006671|twk-17
GO:0006810	transport	CED-12	changed	WBGENE00000426|ced-12
GO:0006810	transport	Y34B4A.2	changed	WBGENE00021319|Y34B4A.2
GO:0006810	transport	LGC-29	changed	WBGENE00044528|lgc-29
GO:0070727	cellular_macromolecule_localization	SYD-2	changed	WBGENE00006364|syd-2
GO:0008104	protein_localization	SYD-2	changed	WBGENE00006364|syd-2
GO:0008104	protein_localization	TIR-1	changed	WBGENE00006575|tir-1
GO:0006403	RNA_localization	Y82E9BR.2	changed	WBGENE00022335|Y82E9BR.2
GO:1990267	response_to_transition_metal_nanoparticle	MRP-7	changed	WBGENE00003413|mrp-7
GO:0010033	response_to_organic_substance	MRP-7	changed	WBGENE00003413|mrp-7
GO:0043207	response_to_external_biotic_stimulus	TIR-1	changed	WBGENE00006575|tir-1
GO:0042330	taxis	SLT-1	changed	WBGENE00004854|slt-1
GO:0042330	taxis	TIR-1	changed	WBGENE00006575|tir-1
GO:0006952	defense_response	TIR-1	changed	WBGENE00006575|tir-1
GO:0048589	developmental_growth	SLT-1	changed	WBGENE00004854|slt-1
GO:0048589	developmental_growth	MATH-33	changed	WBGENE00010406|math-33
GO:0007568	aging	TIR-1	changed	WBGENE00006575|tir-1
GO:0007568	aging	PPFR-1	changed	WBGENE00008878|ppfr-1
GO:0055114	oxidation-reduction_process	K07C5.2	changed	K07C5.2|WBGENE00010625
GO:0044711	single-organism_biosynthetic_process	F10F2.2	changed	F10F2.2|WBGENE00008654
GO:0044711	single-organism_biosynthetic_process	ATIC-1	changed	WBGENE00016957|atic-1
GO:0044281	small_molecule_metabolic_process	F10F2.2	changed	F10F2.2|WBGENE00008654
GO:0044281	small_molecule_metabolic_process	ATIC-1	changed	WBGENE00016957|atic-1
GO:0009653	anatomical_structure_morphogenesis	TTN-1	changed	WBGENE00006436|ttn-1
GO:0009653	anatomical_structure_morphogenesis	SLT-1	changed	WBGENE00004854|slt-1
GO:0009653	anatomical_structure_morphogenesis	TIR-1	changed	WBGENE00006575|tir-1
GO:0009653	anatomical_structure_morphogenesis	CED-12	changed	WBGENE00000426|ced-12
GO:0009653	anatomical_structure_morphogenesis	FKH-9	changed	WBGENE00001441|fkh-9
GO:0061061	muscle_structure_development	TTN-1	changed	WBGENE00006436|ttn-1
GO:0071684	organism_emergence_from_protective_structure	PPFR-1	changed	WBGENE00008878|ppfr-1
GO:0071684	organism_emergence_from_protective_structure	PPH-4.1	changed	WBGENE00004085|pph-4.1
GO:0007275	multicellular_organism_development	TTN-1	changed	WBGENE00006436|ttn-1
GO:0007275	multicellular_organism_development	TIR-1	changed	WBGENE00006575|tir-1
GO:0007275	multicellular_organism_development	SLT-1	changed	WBGENE00004854|slt-1
GO:0007275	multicellular_organism_development	NLP-20	changed	WBGENE00003758|nlp-20
GO:0007275	multicellular_organism_development	FER-1	changed	WBGENE00001414|fer-1
GO:0007275	multicellular_organism_development	T19D12.1	changed	T19D12.1|WBGENE00020576
GO:0007275	multicellular_organism_development	PPFR-1	changed	WBGENE00008878|ppfr-1
GO:0007275	multicellular_organism_development	MATH-33	changed	WBGENE00010406|math-33
GO:0007275	multicellular_organism_development	CED-12	changed	WBGENE00000426|ced-12
GO:0007275	multicellular_organism_development	F26F2.7	changed	F26F2.7|WBGENE00009172
GO:0007275	multicellular_organism_development	PPH-4.1	changed	WBGENE00004085|pph-4.1
GO:0048609	multicellular_organismal_reproductive_process	SYD-2	changed	WBGENE00006364|syd-2
GO:0048609	multicellular_organismal_reproductive_process	FER-1	changed	WBGENE00001414|fer-1
GO:0048609	multicellular_organismal_reproductive_process	PPH-4.1	changed	WBGENE00004085|pph-4.1
GO:0003012	muscle_system_process	TTN-1	changed	WBGENE00006436|ttn-1
GO:0033554	cellular_response_to_stress	TIR-1	changed	WBGENE00006575|tir-1
GO:0051301	cell_division	PPFR-1	changed	WBGENE00008878|ppfr-1
GO:0048869	cellular_developmental_process	TTN-1	changed	WBGENE00006436|ttn-1
GO:0048869	cellular_developmental_process	SLT-1	changed	WBGENE00004854|slt-1
GO:0048869	cellular_developmental_process	TIR-1	changed	WBGENE00006575|tir-1
GO:0048869	cellular_developmental_process	FER-1	changed	WBGENE00001414|fer-1
GO:0048869	cellular_developmental_process	FKH-9	changed	WBGENE00001441|fkh-9
GO:0030029	actin_filament-based_process	TTN-1	changed	WBGENE00006436|ttn-1
GO:0030029	actin_filament-based_process	CED-12	changed	WBGENE00000426|ced-12
GO:0016049	cell_growth	SLT-1	changed	WBGENE00004854|slt-1
GO:0008219	cell_death	CED-12	changed	WBGENE00000426|ced-12
GO:0008219	cell_death	Y34B4A.2	changed	WBGENE00021319|Y34B4A.2
GO:0007154	cell_communication	SYD-2	changed	WBGENE00006364|syd-2
GO:0007154	cell_communication	TIR-1	changed	WBGENE00006575|tir-1
GO:0007154	cell_communication	AC3.12	changed	AC3.12|WBGENE00077503
GO:0007154	cell_communication	SLT-1	changed	WBGENE00004854|slt-1
GO:0007154	cell_communication	NLP-20	changed	WBGENE00003758|nlp-20
GO:0007059	chromosome_segregation	PPFR-1	changed	WBGENE00008878|ppfr-1
GO:0007049	cell_cycle	PPFR-1	changed	WBGENE00008878|ppfr-1
GO:0007049	cell_cycle	PPH-4.1	changed	WBGENE00004085|pph-4.1
GO:0007017	microtubule-based_process	SYD-2	changed	WBGENE00006364|syd-2
GO:0007017	microtubule-based_process	PPFR-1	changed	WBGENE00008878|ppfr-1
GO:0007017	microtubule-based_process	PPH-4.1	changed	WBGENE00004085|pph-4.1
GO:0006928	movement_of_cell_or_subcellular_component	SYD-2	changed	WBGENE00006364|syd-2
GO:0006928	movement_of_cell_or_subcellular_component	SLT-1	changed	WBGENE00004854|slt-1
GO:0006928	movement_of_cell_or_subcellular_component	TIR-1	changed	WBGENE00006575|tir-1
GO:0006928	movement_of_cell_or_subcellular_component	FER-1	changed	WBGENE00001414|fer-1
GO:0006928	movement_of_cell_or_subcellular_component	CED-12	changed	WBGENE00000426|ced-12
GO:0046483	heterocycle_metabolic_process	TIR-1	changed	WBGENE00006575|tir-1
GO:0046483	heterocycle_metabolic_process	F10F2.2	changed	F10F2.2|WBGENE00008654
GO:0046483	heterocycle_metabolic_process	Y82E9BR.2	changed	WBGENE00022335|Y82E9BR.2
GO:0046483	heterocycle_metabolic_process	ATIC-1	changed	WBGENE00016957|atic-1
GO:0046483	heterocycle_metabolic_process	FKH-9	changed	WBGENE00001441|fkh-9
GO:0044249	cellular_biosynthetic_process	TIR-1	changed	WBGENE00006575|tir-1
GO:0044249	cellular_biosynthetic_process	F10F2.2	changed	F10F2.2|WBGENE00008654
GO:0044249	cellular_biosynthetic_process	ATIC-1	changed	WBGENE00016957|atic-1
GO:0044249	cellular_biosynthetic_process	FKH-9	changed	WBGENE00001441|fkh-9
GO:0006793	phosphorus_metabolic_process	TTN-1	changed	WBGENE00006436|ttn-1
GO:0006793	phosphorus_metabolic_process	TIR-1	changed	WBGENE00006575|tir-1
GO:0006793	phosphorus_metabolic_process	F10F2.2	changed	F10F2.2|WBGENE00008654
GO:0006793	phosphorus_metabolic_process	C17H12.3	changed	C17H12.3|WBGENE00015929
GO:0006793	phosphorus_metabolic_process	Y54F10BM.3	changed	WBGENE00021858|Y54F10BM.3
GO:0006793	phosphorus_metabolic_process	PPFR-1	changed	WBGENE00008878|ppfr-1
GO:0006793	phosphorus_metabolic_process	Y106G6D.4	changed	WBGENE00013701|Y106G6D.4
GO:0006793	phosphorus_metabolic_process	ATIC-1	changed	WBGENE00016957|atic-1
GO:0006793	phosphorus_metabolic_process	PPH-4.1	changed	WBGENE00004085|pph-4.1
GO:0006725	cellular_aromatic_compound_metabolic_process	TIR-1	changed	WBGENE00006575|tir-1
GO:0006725	cellular_aromatic_compound_metabolic_process	F10F2.2	changed	F10F2.2|WBGENE00008654
GO:0006725	cellular_aromatic_compound_metabolic_process	Y82E9BR.2	changed	WBGENE00022335|Y82E9BR.2
GO:0006725	cellular_aromatic_compound_metabolic_process	ATIC-1	changed	WBGENE00016957|atic-1
GO:0006725	cellular_aromatic_compound_metabolic_process	FKH-9	changed	WBGENE00001441|fkh-9
GO:1901576	organic_substance_biosynthetic_process	TIR-1	changed	WBGENE00006575|tir-1
GO:1901576	organic_substance_biosynthetic_process	F10F2.2	changed	F10F2.2|WBGENE00008654
GO:1901576	organic_substance_biosynthetic_process	ATIC-1	changed	WBGENE00016957|atic-1
GO:1901576	organic_substance_biosynthetic_process	FKH-9	changed	WBGENE00001441|fkh-9
GO:1901360	organic_cyclic_compound_metabolic_process	TIR-1	changed	WBGENE00006575|tir-1
GO:1901360	organic_cyclic_compound_metabolic_process	F10F2.2	changed	F10F2.2|WBGENE00008654
GO:1901360	organic_cyclic_compound_metabolic_process	Y82E9BR.2	changed	WBGENE00022335|Y82E9BR.2
GO:1901360	organic_cyclic_compound_metabolic_process	ATIC-1	changed	WBGENE00016957|atic-1
GO:1901360	organic_cyclic_compound_metabolic_process	FKH-9	changed	WBGENE00001441|fkh-9
GO:1901135	carbohydrate_derivative_metabolic_process	F10F2.2	changed	F10F2.2|WBGENE00008654
GO:0043170	macromolecule_metabolic_process	TTN-1	changed	WBGENE00006436|ttn-1
GO:0043170	macromolecule_metabolic_process	TIR-1	changed	WBGENE00006575|tir-1
GO:0043170	macromolecule_metabolic_process	C17H12.3	changed	C17H12.3|WBGENE00015929
GO:0043170	macromolecule_metabolic_process	Y54F10BM.3	changed	WBGENE00021858|Y54F10BM.3
GO:0043170	macromolecule_metabolic_process	PPFR-1	changed	WBGENE00008878|ppfr-1
GO:0043170	macromolecule_metabolic_process	Y106G6D.4	changed	WBGENE00013701|Y106G6D.4
GO:0043170	macromolecule_metabolic_process	Y82E9BR.2	changed	WBGENE00022335|Y82E9BR.2
GO:0043170	macromolecule_metabolic_process	MATH-33	changed	WBGENE00010406|math-33
GO:0043170	macromolecule_metabolic_process	Y16B4A.2	changed	WBGENE00012445|Y16B4A.2
GO:0043170	macromolecule_metabolic_process	FKH-9	changed	WBGENE00001441|fkh-9
GO:0043170	macromolecule_metabolic_process	PPH-4.1	changed	WBGENE00004085|pph-4.1
GO:0043170	macromolecule_metabolic_process	SET-29	changed	WBGENE00022371|set-29
GO:1901575	organic_substance_catabolic_process	Y16B4A.2	changed	WBGENE00012445|Y16B4A.2
GO:0044248	cellular_catabolic_process	Y34B4A.2	changed	WBGENE00021319|Y34B4A.2
GO:0044248	cellular_catabolic_process	Y16B4A.2	changed	WBGENE00012445|Y16B4A.2
GO:1901564	organonitrogen_compound_metabolic_process	F10F2.2	changed	F10F2.2|WBGENE00008654
GO:1901564	organonitrogen_compound_metabolic_process	ATIC-1	changed	WBGENE00016957|atic-1
GO:0034641	cellular_nitrogen_compound_metabolic_process	TIR-1	changed	WBGENE00006575|tir-1
GO:0034641	cellular_nitrogen_compound_metabolic_process	F10F2.2	changed	F10F2.2|WBGENE00008654
GO:0034641	cellular_nitrogen_compound_metabolic_process	Y82E9BR.2	changed	WBGENE00022335|Y82E9BR.2
GO:0034641	cellular_nitrogen_compound_metabolic_process	ATIC-1	changed	WBGENE00016957|atic-1
GO:0034641	cellular_nitrogen_compound_metabolic_process	FKH-9	changed	WBGENE00001441|fkh-9
GO:0044703	multi-organism_reproductive_process	FER-1	changed	WBGENE00001414|fer-1
GO:0044702	single_organism_reproductive_process	FER-1	changed	WBGENE00001414|fer-1
GO:0044702	single_organism_reproductive_process	PPFR-1	changed	WBGENE00008878|ppfr-1
GO:0044702	single_organism_reproductive_process	CED-12	changed	WBGENE00000426|ced-12
GO:0044702	single_organism_reproductive_process	PPH-4.1	changed	WBGENE00004085|pph-4.1
GO:0003006	developmental_process_involved_in_reproduction	CED-12	changed	WBGENE00000426|ced-12
GO:0042254	ribosome_biogenesis	SET-29	changed	WBGENE00022371|set-29
GO:0061025	membrane_fusion	FER-1	changed	WBGENE00001414|fer-1
GO:0061025	membrane_fusion	Y34B4A.2	changed	WBGENE00021319|Y34B4A.2
GO:0044802	single-organism_membrane_organization	SYD-2	changed	WBGENE00006364|syd-2
GO:0044802	single-organism_membrane_organization	FER-1	changed	WBGENE00001414|fer-1
GO:0044802	single-organism_membrane_organization	Y34B4A.2	changed	WBGENE00021319|Y34B4A.2
GO:0010324	membrane_invagination	CED-12	changed	WBGENE00000426|ced-12
GO:0071822	protein_complex_subunit_organization	TTN-1	changed	WBGENE00006436|ttn-1
GO:0071822	protein_complex_subunit_organization	PPFR-1	changed	WBGENE00008878|ppfr-1
GO:0071822	protein_complex_subunit_organization	Y34B4A.2	changed	WBGENE00021319|Y34B4A.2
GO:0071822	protein_complex_subunit_organization	CED-12	changed	WBGENE00000426|ced-12
GO:0071822	protein_complex_subunit_organization	PPH-4.1	changed	WBGENE00004085|pph-4.1
GO:0065003	macromolecular_complex_assembly	TTN-1	changed	WBGENE00006436|ttn-1
GO:0065003	macromolecular_complex_assembly	Y34B4A.2	changed	WBGENE00021319|Y34B4A.2
GO:0034329	cell_junction_assembly	MATH-33	changed	WBGENE00010406|math-33
GO:0031268	pseudopodium_organization	FER-1	changed	WBGENE00001414|fer-1
GO:1902589	single-organism_organelle_organization	TTN-1	changed	WBGENE00006436|ttn-1
GO:1902589	single-organism_organelle_organization	PPFR-1	changed	WBGENE00008878|ppfr-1
GO:1902589	single-organism_organelle_organization	CED-12	changed	WBGENE00000426|ced-12
GO:1902589	single-organism_organelle_organization	Y34B4A.2	changed	WBGENE00021319|Y34B4A.2
GO:1902589	single-organism_organelle_organization	PPH-4.1	changed	WBGENE00004085|pph-4.1
GO:0070925	organelle_assembly	TTN-1	changed	WBGENE00006436|ttn-1
GO:0048285	organelle_fission	PPFR-1	changed	WBGENE00008878|ppfr-1
GO:0048285	organelle_fission	PPH-4.1	changed	WBGENE00004085|pph-4.1
GO:0048284	organelle_fusion	Y34B4A.2	changed	WBGENE00021319|Y34B4A.2
GO:0016050	vesicle_organization	Y34B4A.2	changed	WBGENE00021319|Y34B4A.2
GO:0007010	cytoskeleton_organization	TTN-1	changed	WBGENE00006436|ttn-1
GO:0007010	cytoskeleton_organization	PPFR-1	changed	WBGENE00008878|ppfr-1
GO:0007010	cytoskeleton_organization	CED-12	changed	WBGENE00000426|ced-12
GO:0007010	cytoskeleton_organization	PPH-4.1	changed	WBGENE00004085|pph-4.1
GO:0051338	regulation_of_transferase_activity	TIR-1	changed	WBGENE00006575|tir-1
GO:0051336	regulation_of_hydrolase_activity	CED-12	changed	WBGENE00000426|ced-12
GO:0043085	positive_regulation_of_catalytic_activity	TIR-1	changed	WBGENE00006575|tir-1
GO:0043085	positive_regulation_of_catalytic_activity	CED-12	changed	WBGENE00000426|ced-12
GO:0032535	regulation_of_cellular_component_size	SLT-1	changed	WBGENE00004854|slt-1
GO:0030322	stabilization_of_membrane_potential	TWK-17	changed	WBGENE00006671|twk-17
GO:0051726	regulation_of_cell_cycle	PPFR-1	changed	WBGENE00008878|ppfr-1
GO:0051302	regulation_of_cell_division	PPFR-1	changed	WBGENE00008878|ppfr-1
GO:0051128	regulation_of_cellular_component_organization	SLT-1	changed	WBGENE00004854|slt-1
GO:0051128	regulation_of_cellular_component_organization	PPFR-1	changed	WBGENE00008878|ppfr-1
GO:2000026	regulation_of_multicellular_organismal_development	SLT-1	changed	WBGENE00004854|slt-1
GO:0051094	positive_regulation_of_developmental_process	MATH-33	changed	WBGENE00010406|math-33
GO:0051093	negative_regulation_of_developmental_process	SLT-1	changed	WBGENE00004854|slt-1
GO:0022603	regulation_of_anatomical_structure_morphogenesis	SLT-1	changed	WBGENE00004854|slt-1
GO:0048585	negative_regulation_of_response_to_stimulus	SLT-1	changed	WBGENE00004854|slt-1
GO:0048584	positive_regulation_of_response_to_stimulus	TIR-1	changed	WBGENE00006575|tir-1
GO:0032101	regulation_of_response_to_external_stimulus	SLT-1	changed	WBGENE00004854|slt-1
GO:2000242	negative_regulation_of_reproductive_process	PPFR-1	changed	WBGENE00008878|ppfr-1
GO:0051241	negative_regulation_of_multicellular_organismal_process	SLT-1	changed	WBGENE00004854|slt-1
GO:0048523	negative_regulation_of_cellular_process	SLT-1	changed	WBGENE00004854|slt-1
GO:0048523	negative_regulation_of_cellular_process	PPFR-1	changed	WBGENE00008878|ppfr-1
GO:0040013	negative_regulation_of_locomotion	SLT-1	changed	WBGENE00004854|slt-1
GO:0051240	positive_regulation_of_multicellular_organismal_process	MATH-33	changed	WBGENE00010406|math-33
GO:0048522	positive_regulation_of_cellular_process	SYD-2	changed	WBGENE00006364|syd-2
GO:0048522	positive_regulation_of_cellular_process	TIR-1	changed	WBGENE00006575|tir-1
GO:0048522	positive_regulation_of_cellular_process	Y34B4A.2	changed	WBGENE00021319|Y34B4A.2
GO:0048638	regulation_of_developmental_growth	SLT-1	changed	WBGENE00004854|slt-1
GO:0048638	regulation_of_developmental_growth	MATH-33	changed	WBGENE00010406|math-33
GO:0045927	positive_regulation_of_growth	MATH-33	changed	WBGENE00010406|math-33
GO:0045926	negative_regulation_of_growth	SLT-1	changed	WBGENE00004854|slt-1
GO:0060341	regulation_of_cellular_localization	SYD-2	changed	WBGENE00006364|syd-2
GO:0051049	regulation_of_transport	SYD-2	changed	WBGENE00006364|syd-2
GO:0051049	regulation_of_transport	Y34B4A.2	changed	WBGENE00021319|Y34B4A.2
GO:0023056	positive_regulation_of_signaling	SYD-2	changed	WBGENE00006364|syd-2
GO:0023056	positive_regulation_of_signaling	TIR-1	changed	WBGENE00006575|tir-1
GO:0080090	regulation_of_primary_metabolic_process	TIR-1	changed	WBGENE00006575|tir-1
GO:0080090	regulation_of_primary_metabolic_process	FKH-9	changed	WBGENE00001441|fkh-9
GO:0060255	regulation_of_macromolecule_metabolic_process	TIR-1	changed	WBGENE00006575|tir-1
GO:0060255	regulation_of_macromolecule_metabolic_process	FKH-9	changed	WBGENE00001441|fkh-9
GO:0051171	regulation_of_nitrogen_compound_metabolic_process	TIR-1	changed	WBGENE00006575|tir-1
GO:0051171	regulation_of_nitrogen_compound_metabolic_process	FKH-9	changed	WBGENE00001441|fkh-9
GO:0031323	regulation_of_cellular_metabolic_process	TIR-1	changed	WBGENE00006575|tir-1
GO:0031323	regulation_of_cellular_metabolic_process	Y34B4A.2	changed	WBGENE00021319|Y34B4A.2
GO:0031323	regulation_of_cellular_metabolic_process	FKH-9	changed	WBGENE00001441|fkh-9
GO:0009894	regulation_of_catabolic_process	Y34B4A.2	changed	WBGENE00021319|Y34B4A.2
GO:0009893	positive_regulation_of_metabolic_process	TIR-1	changed	WBGENE00006575|tir-1
GO:0009893	positive_regulation_of_metabolic_process	Y34B4A.2	changed	WBGENE00021319|Y34B4A.2
GO:0009889	regulation_of_biosynthetic_process	TIR-1	changed	WBGENE00006575|tir-1
GO:0009889	regulation_of_biosynthetic_process	FKH-9	changed	WBGENE00001441|fkh-9
GO:0051656	establishment_of_organelle_localization	SYD-2	changed	WBGENE00006364|syd-2
GO:0051648	vesicle_localization	SYD-2	changed	WBGENE00006364|syd-2
GO:0046907	intracellular_transport	SYD-2	changed	WBGENE00006364|syd-2
GO:0046907	intracellular_transport	Y82E9BR.2	changed	WBGENE00022335|Y82E9BR.2
GO:0071705	nitrogen_compound_transport	Y82E9BR.2	changed	WBGENE00022335|Y82E9BR.2
GO:0071702	organic_substance_transport	Y82E9BR.2	changed	WBGENE00022335|Y82E9BR.2
GO:0044765	single-organism_transport	SYD-2	changed	WBGENE00006364|syd-2
GO:0044765	single-organism_transport	MRP-7	changed	WBGENE00003413|mrp-7
GO:0044765	single-organism_transport	Y82E9BR.2	changed	WBGENE00022335|Y82E9BR.2
GO:0044765	single-organism_transport	TWK-17	changed	WBGENE00006671|twk-17
GO:0044765	single-organism_transport	CED-12	changed	WBGENE00000426|ced-12
GO:0044765	single-organism_transport	LGC-29	changed	WBGENE00044528|lgc-29
GO:0016192	vesicle-mediated_transport	SYD-2	changed	WBGENE00006364|syd-2
GO:0016192	vesicle-mediated_transport	TIR-1	changed	WBGENE00006575|tir-1
GO:0016192	vesicle-mediated_transport	CED-12	changed	WBGENE00000426|ced-12
GO:0016192	vesicle-mediated_transport	Y34B4A.2	changed	WBGENE00021319|Y34B4A.2
GO:0034613	cellular_protein_localization	SYD-2	changed	WBGENE00006364|syd-2
GO:0051236	establishment_of_RNA_localization	Y82E9BR.2	changed	WBGENE00022335|Y82E9BR.2
GO:0051597	response_to_methylmercury	MRP-7	changed	WBGENE00003413|mrp-7
GO:0051707	response_to_other_organism	TIR-1	changed	WBGENE00006575|tir-1
GO:0006935	chemotaxis	SLT-1	changed	WBGENE00004854|slt-1
GO:0006935	chemotaxis	TIR-1	changed	WBGENE00006575|tir-1
GO:0045087	innate_immune_response	TIR-1	changed	WBGENE00006575|tir-1
GO:0060560	developmental_growth_involved_in_morphogenesis	SLT-1	changed	WBGENE00004854|slt-1
GO:0035264	multicellular_organism_growth	MATH-33	changed	WBGENE00010406|math-33
GO:0010259	multicellular_organism_aging	TIR-1	changed	WBGENE00006575|tir-1
GO:0010259	multicellular_organism_aging	PPFR-1	changed	WBGENE00008878|ppfr-1
GO:0006082	organic_acid_metabolic_process	F10F2.2	changed	F10F2.2|WBGENE00008654
GO:0048646	anatomical_structure_formation_involved_in_morphogenesis	TTN-1	changed	WBGENE00006436|ttn-1
GO:0035188	hatching	PPFR-1	changed	WBGENE00008878|ppfr-1
GO:0035188	hatching	PPH-4.1	changed	WBGENE00004085|pph-4.1
GO:0048731	system_development	SLT-1	changed	WBGENE00004854|slt-1
GO:0048731	system_development	TIR-1	changed	WBGENE00006575|tir-1
GO:0048731	system_development	CED-12	changed	WBGENE00000426|ced-12
GO:0009791	post-embryonic_development	TIR-1	changed	WBGENE00006575|tir-1
GO:0009791	post-embryonic_development	PPH-4.1	changed	WBGENE00004085|pph-4.1
GO:0009790	embryo_development	TTN-1	changed	WBGENE00006436|ttn-1
GO:0009790	embryo_development	TIR-1	changed	WBGENE00006575|tir-1
GO:0009790	embryo_development	NLP-20	changed	WBGENE00003758|nlp-20
GO:0009790	embryo_development	T19D12.1	changed	T19D12.1|WBGENE00020576
GO:0009790	embryo_development	PPFR-1	changed	WBGENE00008878|ppfr-1
GO:0009790	embryo_development	MATH-33	changed	WBGENE00010406|math-33
GO:0009790	embryo_development	F26F2.7	changed	F26F2.7|WBGENE00009172
GO:0009790	embryo_development	PPH-4.1	changed	WBGENE00004085|pph-4.1
GO:0019098	reproductive_behavior	SYD-2	changed	WBGENE00006364|syd-2
GO:0019098	reproductive_behavior	PPH-4.1	changed	WBGENE00004085|pph-4.1
GO:0006936	muscle_contraction	TTN-1	changed	WBGENE00006436|ttn-1
GO:0032989	cellular_component_morphogenesis	TTN-1	changed	WBGENE00006436|ttn-1
GO:0032989	cellular_component_morphogenesis	SLT-1	changed	WBGENE00004854|slt-1
GO:0032989	cellular_component_morphogenesis	TIR-1	changed	WBGENE00006575|tir-1
GO:0030154	cell_differentiation	TTN-1	changed	WBGENE00006436|ttn-1
GO:0030154	cell_differentiation	SLT-1	changed	WBGENE00004854|slt-1
GO:0030154	cell_differentiation	TIR-1	changed	WBGENE00006575|tir-1
GO:0030154	cell_differentiation	FER-1	changed	WBGENE00001414|fer-1
GO:0030154	cell_differentiation	FKH-9	changed	WBGENE00001441|fkh-9
GO:0012501	programmed_cell_death	CED-12	changed	WBGENE00000426|ced-12
GO:0010646	regulation_of_cell_communication	SYD-2	changed	WBGENE00006364|syd-2
GO:0010646	regulation_of_cell_communication	TIR-1	changed	WBGENE00006575|tir-1
GO:0007165	signal_transduction	AC3.12	changed	AC3.12|WBGENE00077503
GO:0007165	signal_transduction	SLT-1	changed	WBGENE00004854|slt-1
GO:0007165	signal_transduction	TIR-1	changed	WBGENE00006575|tir-1
GO:0007165	signal_transduction	NLP-20	changed	WBGENE00003758|nlp-20
GO:0007267	cell-cell_signaling	SYD-2	changed	WBGENE00006364|syd-2
GO:0007267	cell-cell_signaling	TIR-1	changed	WBGENE00006575|tir-1
GO:0051983	regulation_of_chromosome_segregation	PPFR-1	changed	WBGENE00008878|ppfr-1
GO:0022402	cell_cycle_process	PPFR-1	changed	WBGENE00008878|ppfr-1
GO:0022402	cell_cycle_process	PPH-4.1	changed	WBGENE00004085|pph-4.1
GO:0051321	meiotic_cell_cycle	PPFR-1	changed	WBGENE00008878|ppfr-1
GO:0051321	meiotic_cell_cycle	PPH-4.1	changed	WBGENE00004085|pph-4.1
GO:0000278	mitotic_cell_cycle	PPH-4.1	changed	WBGENE00004085|pph-4.1
GO:0032886	regulation_of_microtubule-based_process	SYD-2	changed	WBGENE00006364|syd-2
GO:0032886	regulation_of_microtubule-based_process	PPFR-1	changed	WBGENE00008878|ppfr-1
GO:0051270	regulation_of_cellular_component_movement	SYD-2	changed	WBGENE00006364|syd-2
GO:0051270	regulation_of_cellular_component_movement	SLT-1	changed	WBGENE00004854|slt-1
GO:0051270	regulation_of_cellular_component_movement	CED-12	changed	WBGENE00000426|ced-12
GO:0048870	cell_motility	SLT-1	changed	WBGENE00004854|slt-1
GO:0048870	cell_motility	FER-1	changed	WBGENE00001414|fer-1
GO:0048870	cell_motility	CED-12	changed	WBGENE00000426|ced-12
GO:0007018	microtubule-based_movement	SYD-2	changed	WBGENE00006364|syd-2
GO:0018130	heterocycle_biosynthetic_process	TIR-1	changed	WBGENE00006575|tir-1
GO:0018130	heterocycle_biosynthetic_process	F10F2.2	changed	F10F2.2|WBGENE00008654
GO:0018130	heterocycle_biosynthetic_process	ATIC-1	changed	WBGENE00016957|atic-1
GO:0018130	heterocycle_biosynthetic_process	FKH-9	changed	WBGENE00001441|fkh-9
GO:0019637	organophosphate_metabolic_process	F10F2.2	changed	F10F2.2|WBGENE00008654
GO:0019637	organophosphate_metabolic_process	ATIC-1	changed	WBGENE00016957|atic-1
GO:0006796	phosphate-containing_compound_metabolic_process	TTN-1	changed	WBGENE00006436|ttn-1
GO:0006796	phosphate-containing_compound_metabolic_process	TIR-1	changed	WBGENE00006575|tir-1
GO:0006796	phosphate-containing_compound_metabolic_process	F10F2.2	changed	F10F2.2|WBGENE00008654
GO:0006796	phosphate-containing_compound_metabolic_process	C17H12.3	changed	C17H12.3|WBGENE00015929
GO:0006796	phosphate-containing_compound_metabolic_process	Y54F10BM.3	changed	WBGENE00021858|Y54F10BM.3
GO:0006796	phosphate-containing_compound_metabolic_process	PPFR-1	changed	WBGENE00008878|ppfr-1
GO:0006796	phosphate-containing_compound_metabolic_process	Y106G6D.4	changed	WBGENE00013701|Y106G6D.4
GO:0006796	phosphate-containing_compound_metabolic_process	ATIC-1	changed	WBGENE00016957|atic-1
GO:0006796	phosphate-containing_compound_metabolic_process	PPH-4.1	changed	WBGENE00004085|pph-4.1
GO:0019438	aromatic_compound_biosynthetic_process	TIR-1	changed	WBGENE00006575|tir-1
GO:0019438	aromatic_compound_biosynthetic_process	F10F2.2	changed	F10F2.2|WBGENE00008654
GO:0019438	aromatic_compound_biosynthetic_process	ATIC-1	changed	WBGENE00016957|atic-1
GO:0019438	aromatic_compound_biosynthetic_process	FKH-9	changed	WBGENE00001441|fkh-9
GO:1901566	organonitrogen_compound_biosynthetic_process	F10F2.2	changed	F10F2.2|WBGENE00008654
GO:1901566	organonitrogen_compound_biosynthetic_process	ATIC-1	changed	WBGENE00016957|atic-1
GO:1901362	organic_cyclic_compound_biosynthetic_process	TIR-1	changed	WBGENE00006575|tir-1
GO:1901362	organic_cyclic_compound_biosynthetic_process	F10F2.2	changed	F10F2.2|WBGENE00008654
GO:1901362	organic_cyclic_compound_biosynthetic_process	ATIC-1	changed	WBGENE00016957|atic-1
GO:1901362	organic_cyclic_compound_biosynthetic_process	FKH-9	changed	WBGENE00001441|fkh-9
GO:1901137	carbohydrate_derivative_biosynthetic_process	F10F2.2	changed	F10F2.2|WBGENE00008654
GO:0044260	cellular_macromolecule_metabolic_process	TTN-1	changed	WBGENE00006436|ttn-1
GO:0044260	cellular_macromolecule_metabolic_process	TIR-1	changed	WBGENE00006575|tir-1
GO:0044260	cellular_macromolecule_metabolic_process	C17H12.3	changed	C17H12.3|WBGENE00015929
GO:0044260	cellular_macromolecule_metabolic_process	Y54F10BM.3	changed	WBGENE00021858|Y54F10BM.3
GO:0044260	cellular_macromolecule_metabolic_process	PPFR-1	changed	WBGENE00008878|ppfr-1
GO:0044260	cellular_macromolecule_metabolic_process	Y106G6D.4	changed	WBGENE00013701|Y106G6D.4
GO:0044260	cellular_macromolecule_metabolic_process	Y82E9BR.2	changed	WBGENE00022335|Y82E9BR.2
GO:0044260	cellular_macromolecule_metabolic_process	MATH-33	changed	WBGENE00010406|math-33
GO:0044260	cellular_macromolecule_metabolic_process	Y16B4A.2	changed	WBGENE00012445|Y16B4A.2
GO:0044260	cellular_macromolecule_metabolic_process	FKH-9	changed	WBGENE00001441|fkh-9
GO:0044260	cellular_macromolecule_metabolic_process	PPH-4.1	changed	WBGENE00004085|pph-4.1
GO:0044260	cellular_macromolecule_metabolic_process	SET-29	changed	WBGENE00022371|set-29
GO:0043412	macromolecule_modification	TTN-1	changed	WBGENE00006436|ttn-1
GO:0043412	macromolecule_modification	TIR-1	changed	WBGENE00006575|tir-1
GO:0043412	macromolecule_modification	C17H12.3	changed	C17H12.3|WBGENE00015929
GO:0043412	macromolecule_modification	Y54F10BM.3	changed	WBGENE00021858|Y54F10BM.3
GO:0043412	macromolecule_modification	PPFR-1	changed	WBGENE00008878|ppfr-1
GO:0043412	macromolecule_modification	Y106G6D.4	changed	WBGENE00013701|Y106G6D.4
GO:0043412	macromolecule_modification	MATH-33	changed	WBGENE00010406|math-33
GO:0043412	macromolecule_modification	PPH-4.1	changed	WBGENE00004085|pph-4.1
GO:0043412	macromolecule_modification	SET-29	changed	WBGENE00022371|set-29
GO:0019538	protein_metabolic_process	TTN-1	changed	WBGENE00006436|ttn-1
GO:0019538	protein_metabolic_process	TIR-1	changed	WBGENE00006575|tir-1
GO:0019538	protein_metabolic_process	C17H12.3	changed	C17H12.3|WBGENE00015929
GO:0019538	protein_metabolic_process	Y54F10BM.3	changed	WBGENE00021858|Y54F10BM.3
GO:0019538	protein_metabolic_process	PPFR-1	changed	WBGENE00008878|ppfr-1
GO:0019538	protein_metabolic_process	Y106G6D.4	changed	WBGENE00013701|Y106G6D.4
GO:0019538	protein_metabolic_process	MATH-33	changed	WBGENE00010406|math-33
GO:0019538	protein_metabolic_process	Y16B4A.2	changed	WBGENE00012445|Y16B4A.2
GO:0019538	protein_metabolic_process	PPH-4.1	changed	WBGENE00004085|pph-4.1
GO:0019538	protein_metabolic_process	SET-29	changed	WBGENE00022371|set-29
GO:0010467	gene_expression	TIR-1	changed	WBGENE00006575|tir-1
GO:0010467	gene_expression	Y82E9BR.2	changed	WBGENE00022335|Y82E9BR.2
GO:0010467	gene_expression	FKH-9	changed	WBGENE00001441|fkh-9
GO:0009059	macromolecule_biosynthetic_process	TIR-1	changed	WBGENE00006575|tir-1
GO:0009059	macromolecule_biosynthetic_process	FKH-9	changed	WBGENE00001441|fkh-9
GO:0009057	macromolecule_catabolic_process	Y16B4A.2	changed	WBGENE00012445|Y16B4A.2
GO:0072521	purine-containing_compound_metabolic_process	F10F2.2	changed	F10F2.2|WBGENE00008654
GO:0072521	purine-containing_compound_metabolic_process	ATIC-1	changed	WBGENE00016957|atic-1
GO:0044271	cellular_nitrogen_compound_biosynthetic_process	TIR-1	changed	WBGENE00006575|tir-1
GO:0044271	cellular_nitrogen_compound_biosynthetic_process	F10F2.2	changed	F10F2.2|WBGENE00008654
GO:0044271	cellular_nitrogen_compound_biosynthetic_process	ATIC-1	changed	WBGENE00016957|atic-1
GO:0044271	cellular_nitrogen_compound_biosynthetic_process	FKH-9	changed	WBGENE00001441|fkh-9
GO:0006139	nucleobase-containing_compound_metabolic_process	TIR-1	changed	WBGENE00006575|tir-1
GO:0006139	nucleobase-containing_compound_metabolic_process	F10F2.2	changed	F10F2.2|WBGENE00008654
GO:0006139	nucleobase-containing_compound_metabolic_process	Y82E9BR.2	changed	WBGENE00022335|Y82E9BR.2
GO:0006139	nucleobase-containing_compound_metabolic_process	ATIC-1	changed	WBGENE00016957|atic-1
GO:0006139	nucleobase-containing_compound_metabolic_process	FKH-9	changed	WBGENE00001441|fkh-9
GO:0019953	sexual_reproduction	FER-1	changed	WBGENE00001414|fer-1
GO:0007548	sex_differentiation	CED-12	changed	WBGENE00000426|ced-12
GO:0044801	single-organism_membrane_fusion	Y34B4A.2	changed	WBGENE00021319|Y34B4A.2
GO:0072657	protein_localization_to_membrane	SYD-2	changed	WBGENE00006364|syd-2
GO:0007009	plasma_membrane_organization	FER-1	changed	WBGENE00001414|fer-1
GO:0034622	cellular_macromolecular_complex_assembly	TTN-1	changed	WBGENE00006436|ttn-1
GO:0034622	cellular_macromolecular_complex_assembly	Y34B4A.2	changed	WBGENE00021319|Y34B4A.2
GO:0006461	protein_complex_assembly	TTN-1	changed	WBGENE00006436|ttn-1
GO:0006461	protein_complex_assembly	Y34B4A.2	changed	WBGENE00021319|Y34B4A.2
GO:0007044	cell-substrate_junction_assembly	MATH-33	changed	WBGENE00010406|math-33
GO:0000280	nuclear_division	PPFR-1	changed	WBGENE00008878|ppfr-1
GO:0000280	nuclear_division	PPH-4.1	changed	WBGENE00004085|pph-4.1
GO:0030036	actin_cytoskeleton_organization	TTN-1	changed	WBGENE00006436|ttn-1
GO:0030036	actin_cytoskeleton_organization	CED-12	changed	WBGENE00000426|ced-12
GO:0000226	microtubule_cytoskeleton_organization	PPFR-1	changed	WBGENE00008878|ppfr-1
GO:0000226	microtubule_cytoskeleton_organization	PPH-4.1	changed	WBGENE00004085|pph-4.1
GO:0043087	regulation_of_GTPase_activity	CED-12	changed	WBGENE00000426|ced-12
GO:0051347	positive_regulation_of_transferase_activity	TIR-1	changed	WBGENE00006575|tir-1
GO:0051345	positive_regulation_of_hydrolase_activity	CED-12	changed	WBGENE00000426|ced-12
GO:0008361	regulation_of_cell_size	SLT-1	changed	WBGENE00004854|slt-1
GO:0051445	regulation_of_meiotic_cell_cycle	PPFR-1	changed	WBGENE00008878|ppfr-1
GO:0045786	negative_regulation_of_cell_cycle	PPFR-1	changed	WBGENE00008878|ppfr-1
GO:0010564	regulation_of_cell_cycle_process	PPFR-1	changed	WBGENE00008878|ppfr-1
GO:0051782	negative_regulation_of_cell_division	PPFR-1	changed	WBGENE00008878|ppfr-1
GO:0051129	negative_regulation_of_cellular_component_organization	SLT-1	changed	WBGENE00004854|slt-1
GO:0051129	negative_regulation_of_cellular_component_organization	PPFR-1	changed	WBGENE00008878|ppfr-1
GO:0033043	regulation_of_organelle_organization	PPFR-1	changed	WBGENE00008878|ppfr-1
GO:0031344	regulation_of_cell_projection_organization	SLT-1	changed	WBGENE00004854|slt-1
GO:0001558	regulation_of_cell_growth	SLT-1	changed	WBGENE00004854|slt-1
GO:0050920	regulation_of_chemotaxis	SLT-1	changed	WBGENE00004854|slt-1
GO:0032102	negative_regulation_of_response_to_external_stimulus	SLT-1	changed	WBGENE00004854|slt-1
GO:0048639	positive_regulation_of_developmental_growth	MATH-33	changed	WBGENE00010406|math-33
GO:0048640	negative_regulation_of_developmental_growth	SLT-1	changed	WBGENE00004854|slt-1
GO:0060627	regulation_of_vesicle-mediated_transport	SYD-2	changed	WBGENE00006364|syd-2
GO:0060627	regulation_of_vesicle-mediated_transport	Y34B4A.2	changed	WBGENE00021319|Y34B4A.2
GO:0051050	positive_regulation_of_transport	SYD-2	changed	WBGENE00006364|syd-2
GO:0051246	regulation_of_protein_metabolic_process	TIR-1	changed	WBGENE00006575|tir-1
GO:0019219	regulation_of_nucleobase-containing_compound_metabolic_process	TIR-1	changed	WBGENE00006575|tir-1
GO:0019219	regulation_of_nucleobase-containing_compound_metabolic_process	FKH-9	changed	WBGENE00001441|fkh-9
GO:0010468	regulation_of_gene_expression	TIR-1	changed	WBGENE00006575|tir-1
GO:0010468	regulation_of_gene_expression	FKH-9	changed	WBGENE00001441|fkh-9
GO:0051174	regulation_of_phosphorus_metabolic_process	TIR-1	changed	WBGENE00006575|tir-1
GO:0031329	regulation_of_cellular_catabolic_process	Y34B4A.2	changed	WBGENE00021319|Y34B4A.2
GO:0009896	positive_regulation_of_catabolic_process	Y34B4A.2	changed	WBGENE00021319|Y34B4A.2
GO:0051173	positive_regulation_of_nitrogen_compound_metabolic_process	TIR-1	changed	WBGENE00006575|tir-1
GO:0031325	positive_regulation_of_cellular_metabolic_process	TIR-1	changed	WBGENE00006575|tir-1
GO:0031325	positive_regulation_of_cellular_metabolic_process	Y34B4A.2	changed	WBGENE00021319|Y34B4A.2
GO:0010604	positive_regulation_of_macromolecule_metabolic_process	TIR-1	changed	WBGENE00006575|tir-1
GO:0031326	regulation_of_cellular_biosynthetic_process	TIR-1	changed	WBGENE00006575|tir-1
GO:0031326	regulation_of_cellular_biosynthetic_process	FKH-9	changed	WBGENE00001441|fkh-9
GO:0010556	regulation_of_macromolecule_biosynthetic_process	TIR-1	changed	WBGENE00006575|tir-1
GO:0010556	regulation_of_macromolecule_biosynthetic_process	FKH-9	changed	WBGENE00001441|fkh-9
GO:0009891	positive_regulation_of_biosynthetic_process	TIR-1	changed	WBGENE00006575|tir-1
GO:0097479	synaptic_vesicle_localization	SYD-2	changed	WBGENE00006364|syd-2
GO:0051650	establishment_of_vesicle_localization	SYD-2	changed	WBGENE00006364|syd-2
GO:0032386	regulation_of_intracellular_transport	SYD-2	changed	WBGENE00006364|syd-2
GO:1902582	single-organism_intracellular_transport	SYD-2	changed	WBGENE00006364|syd-2
GO:1902582	single-organism_intracellular_transport	Y82E9BR.2	changed	WBGENE00022335|Y82E9BR.2
GO:0051169	nuclear_transport	Y82E9BR.2	changed	WBGENE00022335|Y82E9BR.2
GO:0016482	cytosolic_transport	SYD-2	changed	WBGENE00006364|syd-2
GO:0015931	nucleobase-containing_compound_transport	Y82E9BR.2	changed	WBGENE00022335|Y82E9BR.2
GO:0055085	transmembrane_transport	MRP-7	changed	WBGENE00003413|mrp-7
GO:0055085	transmembrane_transport	TWK-17	changed	WBGENE00006671|twk-17
GO:0055085	transmembrane_transport	LGC-29	changed	WBGENE00044528|lgc-29
GO:0006811	ion_transport	TWK-17	changed	WBGENE00006671|twk-17
GO:0006811	ion_transport	LGC-29	changed	WBGENE00044528|lgc-29
GO:0006897	endocytosis	TIR-1	changed	WBGENE00006575|tir-1
GO:0006897	endocytosis	CED-12	changed	WBGENE00000426|ced-12
GO:0098542	defense_response_to_other_organism	TIR-1	changed	WBGENE00006575|tir-1
GO:0009620	response_to_fungus	TIR-1	changed	WBGENE00006575|tir-1
GO:0009617	response_to_bacterium	TIR-1	changed	WBGENE00006575|tir-1
GO:0040014	regulation_of_multicellular_organism_growth	MATH-33	changed	WBGENE00010406|math-33
GO:0008340	determination_of_adult_lifespan	TIR-1	changed	WBGENE00006575|tir-1
GO:0008340	determination_of_adult_lifespan	PPFR-1	changed	WBGENE00008878|ppfr-1
GO:0043436	oxoacid_metabolic_process	F10F2.2	changed	F10F2.2|WBGENE00008654
GO:0048513	animal_organ_development	CED-12	changed	WBGENE00000426|ced-12
GO:0061458	reproductive_system_development	CED-12	changed	WBGENE00000426|ced-12
GO:0007399	nervous_system_development	SLT-1	changed	WBGENE00004854|slt-1
GO:0007399	nervous_system_development	TIR-1	changed	WBGENE00006575|tir-1
GO:0002164	larval_development	TIR-1	changed	WBGENE00006575|tir-1
GO:0002164	larval_development	PPH-4.1	changed	WBGENE00004085|pph-4.1
GO:0009792	embryo_development_ending_in_birth_or_egg_hatching	TTN-1	changed	WBGENE00006436|ttn-1
GO:0009792	embryo_development_ending_in_birth_or_egg_hatching	TIR-1	changed	WBGENE00006575|tir-1
GO:0009792	embryo_development_ending_in_birth_or_egg_hatching	NLP-20	changed	WBGENE00003758|nlp-20
GO:0009792	embryo_development_ending_in_birth_or_egg_hatching	T19D12.1	changed	T19D12.1|WBGENE00020576
GO:0009792	embryo_development_ending_in_birth_or_egg_hatching	PPFR-1	changed	WBGENE00008878|ppfr-1
GO:0009792	embryo_development_ending_in_birth_or_egg_hatching	MATH-33	changed	WBGENE00010406|math-33
GO:0009792	embryo_development_ending_in_birth_or_egg_hatching	F26F2.7	changed	F26F2.7|WBGENE00009172
GO:0009792	embryo_development_ending_in_birth_or_egg_hatching	PPH-4.1	changed	WBGENE00004085|pph-4.1
GO:0018991	oviposition	SYD-2	changed	WBGENE00006364|syd-2
GO:0018991	oviposition	PPH-4.1	changed	WBGENE00004085|pph-4.1
GO:0006941	striated_muscle_contraction	TTN-1	changed	WBGENE00006436|ttn-1
GO:0010927	cellular_component_assembly_involved_in_morphogenesis	TTN-1	changed	WBGENE00006436|ttn-1
GO:0032990	cell_part_morphogenesis	SLT-1	changed	WBGENE00004854|slt-1
GO:0032990	cell_part_morphogenesis	TIR-1	changed	WBGENE00006575|tir-1
GO:0000902	cell_morphogenesis	SLT-1	changed	WBGENE00004854|slt-1
GO:0000902	cell_morphogenesis	TIR-1	changed	WBGENE00006575|tir-1
GO:0048468	cell_development	TTN-1	changed	WBGENE00006436|ttn-1
GO:0048468	cell_development	SLT-1	changed	WBGENE00004854|slt-1
GO:0048468	cell_development	TIR-1	changed	WBGENE00006575|tir-1
GO:0045595	regulation_of_cell_differentiation	SLT-1	changed	WBGENE00004854|slt-1
GO:0045165	cell_fate_commitment	TIR-1	changed	WBGENE00006575|tir-1
GO:0042692	muscle_cell_differentiation	TTN-1	changed	WBGENE00006436|ttn-1
GO:0006915	apoptotic_process	CED-12	changed	WBGENE00000426|ced-12
GO:0010647	positive_regulation_of_cell_communication	SYD-2	changed	WBGENE00006364|syd-2
GO:0010647	positive_regulation_of_cell_communication	TIR-1	changed	WBGENE00006575|tir-1
GO:0009966	regulation_of_signal_transduction	TIR-1	changed	WBGENE00006575|tir-1
GO:0035556	intracellular_signal_transduction	TIR-1	changed	WBGENE00006575|tir-1
GO:0007186	G-protein_coupled_receptor_signaling_pathway	NLP-20	changed	WBGENE00003758|nlp-20
GO:0007166	cell_surface_receptor_signaling_pathway	AC3.12	changed	AC3.12|WBGENE00077503
GO:0007166	cell_surface_receptor_signaling_pathway	SLT-1	changed	WBGENE00004854|slt-1
GO:0099536	synaptic_signaling	SYD-2	changed	WBGENE00006364|syd-2
GO:0051985	negative_regulation_of_chromosome_segregation	PPFR-1	changed	WBGENE00008878|ppfr-1
GO:1903047	mitotic_cell_cycle_process	PPH-4.1	changed	WBGENE00004085|pph-4.1
GO:1903046	meiotic_cell_cycle_process	PPFR-1	changed	WBGENE00008878|ppfr-1
GO:1903046	meiotic_cell_cycle_process	PPH-4.1	changed	WBGENE00004085|pph-4.1
GO:0098813	nuclear_chromosome_segregation	PPFR-1	changed	WBGENE00008878|ppfr-1
GO:0060632	regulation_of_microtubule-based_movement	SYD-2	changed	WBGENE00006364|syd-2
GO:2000145	regulation_of_cell_motility	CED-12	changed	WBGENE00000426|ced-12
GO:0051272	positive_regulation_of_cellular_component_movement	SYD-2	changed	WBGENE00006364|syd-2
GO:0051271	negative_regulation_of_cellular_component_movement	SLT-1	changed	WBGENE00004854|slt-1
GO:0030317	sperm_motility	FER-1	changed	WBGENE00001414|fer-1
GO:0016477	cell_migration	SLT-1	changed	WBGENE00004854|slt-1
GO:0016477	cell_migration	CED-12	changed	WBGENE00000426|ced-12
GO:0010970	establishment_of_localization_by_movement_along_microtubule	SYD-2	changed	WBGENE00006364|syd-2
GO:0090407	organophosphate_biosynthetic_process	F10F2.2	changed	F10F2.2|WBGENE00008654
GO:0090407	organophosphate_biosynthetic_process	ATIC-1	changed	WBGENE00016957|atic-1
GO:0019693	ribose_phosphate_metabolic_process	F10F2.2	changed	F10F2.2|WBGENE00008654
GO:0016311	dephosphorylation	C17H12.3	changed	C17H12.3|WBGENE00015929
GO:0016311	dephosphorylation	Y54F10BM.3	changed	WBGENE00021858|Y54F10BM.3
GO:0016311	dephosphorylation	PPFR-1	changed	WBGENE00008878|ppfr-1
GO:0016311	dephosphorylation	PPH-4.1	changed	WBGENE00004085|pph-4.1
GO:0016310	phosphorylation	TTN-1	changed	WBGENE00006436|ttn-1
GO:0016310	phosphorylation	TIR-1	changed	WBGENE00006575|tir-1
GO:0016310	phosphorylation	Y106G6D.4	changed	WBGENE00013701|Y106G6D.4
GO:0044267	cellular_protein_metabolic_process	TTN-1	changed	WBGENE00006436|ttn-1
GO:0044267	cellular_protein_metabolic_process	TIR-1	changed	WBGENE00006575|tir-1
GO:0044267	cellular_protein_metabolic_process	C17H12.3	changed	C17H12.3|WBGENE00015929
GO:0044267	cellular_protein_metabolic_process	Y54F10BM.3	changed	WBGENE00021858|Y54F10BM.3
GO:0044267	cellular_protein_metabolic_process	PPFR-1	changed	WBGENE00008878|ppfr-1
GO:0044267	cellular_protein_metabolic_process	Y106G6D.4	changed	WBGENE00013701|Y106G6D.4
GO:0044267	cellular_protein_metabolic_process	MATH-33	changed	WBGENE00010406|math-33
GO:0044267	cellular_protein_metabolic_process	Y16B4A.2	changed	WBGENE00012445|Y16B4A.2
GO:0044267	cellular_protein_metabolic_process	PPH-4.1	changed	WBGENE00004085|pph-4.1
GO:0044267	cellular_protein_metabolic_process	SET-29	changed	WBGENE00022371|set-29
GO:0034645	cellular_macromolecule_biosynthetic_process	TIR-1	changed	WBGENE00006575|tir-1
GO:0034645	cellular_macromolecule_biosynthetic_process	FKH-9	changed	WBGENE00001441|fkh-9
GO:0043414	macromolecule_methylation	SET-29	changed	WBGENE00022371|set-29
GO:0036211	protein_modification_process	TTN-1	changed	WBGENE00006436|ttn-1
GO:0036211	protein_modification_process	TIR-1	changed	WBGENE00006575|tir-1
GO:0036211	protein_modification_process	C17H12.3	changed	C17H12.3|WBGENE00015929
GO:0036211	protein_modification_process	Y54F10BM.3	changed	WBGENE00021858|Y54F10BM.3
GO:0036211	protein_modification_process	PPFR-1	changed	WBGENE00008878|ppfr-1
GO:0036211	protein_modification_process	Y106G6D.4	changed	WBGENE00013701|Y106G6D.4
GO:0036211	protein_modification_process	MATH-33	changed	WBGENE00010406|math-33
GO:0036211	protein_modification_process	PPH-4.1	changed	WBGENE00004085|pph-4.1
GO:0036211	protein_modification_process	SET-29	changed	WBGENE00022371|set-29
GO:0006508	proteolysis	MATH-33	changed	WBGENE00010406|math-33
GO:0006508	proteolysis	Y16B4A.2	changed	WBGENE00012445|Y16B4A.2
GO:0044265	cellular_macromolecule_catabolic_process	Y16B4A.2	changed	WBGENE00012445|Y16B4A.2
GO:0030163	protein_catabolic_process	Y16B4A.2	changed	WBGENE00012445|Y16B4A.2
GO:0072522	purine-containing_compound_biosynthetic_process	F10F2.2	changed	F10F2.2|WBGENE00008654
GO:0072522	purine-containing_compound_biosynthetic_process	ATIC-1	changed	WBGENE00016957|atic-1
GO:0034654	nucleobase-containing_compound_biosynthetic_process	TIR-1	changed	WBGENE00006575|tir-1
GO:0034654	nucleobase-containing_compound_biosynthetic_process	F10F2.2	changed	F10F2.2|WBGENE00008654
GO:0034654	nucleobase-containing_compound_biosynthetic_process	ATIC-1	changed	WBGENE00016957|atic-1
GO:0034654	nucleobase-containing_compound_biosynthetic_process	FKH-9	changed	WBGENE00001441|fkh-9
GO:0090304	nucleic_acid_metabolic_process	TIR-1	changed	WBGENE00006575|tir-1
GO:0090304	nucleic_acid_metabolic_process	Y82E9BR.2	changed	WBGENE00022335|Y82E9BR.2
GO:0090304	nucleic_acid_metabolic_process	FKH-9	changed	WBGENE00001441|fkh-9
GO:0055086	nucleobase-containing_small_molecule_metabolic_process	F10F2.2	changed	F10F2.2|WBGENE00008654
GO:0055086	nucleobase-containing_small_molecule_metabolic_process	ATIC-1	changed	WBGENE00016957|atic-1
GO:0007276	gamete_generation	FER-1	changed	WBGENE00001414|fer-1
GO:0045137	development_of_primary_sexual_characteristics	CED-12	changed	WBGENE00000426|ced-12
GO:0090174	organelle_membrane_fusion	Y34B4A.2	changed	WBGENE00021319|Y34B4A.2
GO:0043113	receptor_clustering	SYD-2	changed	WBGENE00006364|syd-2
GO:0043623	cellular_protein_complex_assembly	TTN-1	changed	WBGENE00006436|ttn-1
GO:0043623	cellular_protein_complex_assembly	Y34B4A.2	changed	WBGENE00021319|Y34B4A.2
GO:0031581	hemidesmosome_assembly	MATH-33	changed	WBGENE00010406|math-33
GO:0051783	regulation_of_nuclear_division	PPFR-1	changed	WBGENE00008878|ppfr-1
GO:0007126	meiotic_nuclear_division	PPFR-1	changed	WBGENE00008878|ppfr-1
GO:0007126	meiotic_nuclear_division	PPH-4.1	changed	WBGENE00004085|pph-4.1
GO:0007015	actin_filament_organization	TTN-1	changed	WBGENE00006436|ttn-1
GO:0007015	actin_filament_organization	CED-12	changed	WBGENE00000426|ced-12
GO:0031532	actin_cytoskeleton_reorganization	CED-12	changed	WBGENE00000426|ced-12
GO:0031033	myosin_filament_organization	TTN-1	changed	WBGENE00006436|ttn-1
GO:0031032	actomyosin_structure_organization	TTN-1	changed	WBGENE00006436|ttn-1
GO:0007051	spindle_organization	PPFR-1	changed	WBGENE00008878|ppfr-1
GO:0007051	spindle_organization	PPH-4.1	changed	WBGENE00004085|pph-4.1
GO:0043547	positive_regulation_of_GTPase_activity	CED-12	changed	WBGENE00000426|ced-12
GO:0061387	regulation_of_extent_of_cell_growth	SLT-1	changed	WBGENE00004854|slt-1
GO:0051447	negative_regulation_of_meiotic_cell_cycle	PPFR-1	changed	WBGENE00008878|ppfr-1
GO:0010948	negative_regulation_of_cell_cycle_process	PPFR-1	changed	WBGENE00008878|ppfr-1
GO:0051493	regulation_of_cytoskeleton_organization	PPFR-1	changed	WBGENE00008878|ppfr-1
GO:0010639	negative_regulation_of_organelle_organization	PPFR-1	changed	WBGENE00008878|ppfr-1
GO:0031345	negative_regulation_of_cell_projection_organization	SLT-1	changed	WBGENE00004854|slt-1
GO:0030308	negative_regulation_of_cell_growth	SLT-1	changed	WBGENE00004854|slt-1
GO:0050922	negative_regulation_of_chemotaxis	SLT-1	changed	WBGENE00004854|slt-1
GO:0040018	positive_regulation_of_multicellular_organism_growth	MATH-33	changed	WBGENE00010406|math-33
GO:0051247	positive_regulation_of_protein_metabolic_process	TIR-1	changed	WBGENE00006575|tir-1
GO:0045935	positive_regulation_of_nucleobase-containing_compound_metabolic_process	TIR-1	changed	WBGENE00006575|tir-1
GO:0019220	regulation_of_phosphate_metabolic_process	TIR-1	changed	WBGENE00006575|tir-1
GO:0010562	positive_regulation_of_phosphorus_metabolic_process	TIR-1	changed	WBGENE00006575|tir-1
GO:0010506	regulation_of_autophagy	Y34B4A.2	changed	WBGENE00021319|Y34B4A.2
GO:0031331	positive_regulation_of_cellular_catabolic_process	Y34B4A.2	changed	WBGENE00021319|Y34B4A.2
GO:0010628	positive_regulation_of_gene_expression	TIR-1	changed	WBGENE00006575|tir-1
GO:2000112	regulation_of_cellular_macromolecule_biosynthetic_process	TIR-1	changed	WBGENE00006575|tir-1
GO:2000112	regulation_of_cellular_macromolecule_biosynthetic_process	FKH-9	changed	WBGENE00001441|fkh-9
GO:0031328	positive_regulation_of_cellular_biosynthetic_process	TIR-1	changed	WBGENE00006575|tir-1
GO:0010557	positive_regulation_of_macromolecule_biosynthetic_process	TIR-1	changed	WBGENE00006575|tir-1
GO:0097480	establishment_of_synaptic_vesicle_localization	SYD-2	changed	WBGENE00006364|syd-2
GO:1903649	regulation_of_cytoplasmic_transport	SYD-2	changed	WBGENE00006364|syd-2
GO:0032388	positive_regulation_of_intracellular_transport	SYD-2	changed	WBGENE00006364|syd-2
GO:0030705	cytoskeleton-dependent_intracellular_transport	SYD-2	changed	WBGENE00006364|syd-2
GO:0006913	nucleocytoplasmic_transport	Y82E9BR.2	changed	WBGENE00022335|Y82E9BR.2
GO:0050657	nucleic_acid_transport	Y82E9BR.2	changed	WBGENE00022335|Y82E9BR.2
GO:0034220	ion_transmembrane_transport	TWK-17	changed	WBGENE00006671|twk-17
GO:0034220	ion_transmembrane_transport	LGC-29	changed	WBGENE00044528|lgc-29
GO:0006812	cation_transport	TWK-17	changed	WBGENE00006671|twk-17
GO:0006909	phagocytosis	CED-12	changed	WBGENE00000426|ced-12
GO:0006898	receptor-mediated_endocytosis	TIR-1	changed	WBGENE00006575|tir-1
GO:0050832	defense_response_to_fungus	TIR-1	changed	WBGENE00006575|tir-1
GO:0042742	defense_response_to_bacterium	TIR-1	changed	WBGENE00006575|tir-1
GO:0019752	carboxylic_acid_metabolic_process	F10F2.2	changed	F10F2.2|WBGENE00008654
GO:0009887	organ_morphogenesis	CED-12	changed	WBGENE00000426|ced-12
GO:0048608	reproductive_structure_development	CED-12	changed	WBGENE00000426|ced-12
GO:0051960	regulation_of_nervous_system_development	SLT-1	changed	WBGENE00004854|slt-1
GO:0022008	neurogenesis	SLT-1	changed	WBGENE00004854|slt-1
GO:0022008	neurogenesis	TIR-1	changed	WBGENE00006575|tir-1
GO:0002119	nematode_larval_development	TIR-1	changed	WBGENE00006575|tir-1
GO:0002119	nematode_larval_development	PPH-4.1	changed	WBGENE00004085|pph-4.1
GO:0048858	cell_projection_morphogenesis	SLT-1	changed	WBGENE00004854|slt-1
GO:0048858	cell_projection_morphogenesis	TIR-1	changed	WBGENE00006575|tir-1
GO:0022604	regulation_of_cell_morphogenesis	SLT-1	changed	WBGENE00004854|slt-1
GO:0000904	cell_morphogenesis_involved_in_differentiation	SLT-1	changed	WBGENE00004854|slt-1
GO:0000904	cell_morphogenesis_involved_in_differentiation	TIR-1	changed	WBGENE00006575|tir-1
GO:0048588	developmental_cell_growth	SLT-1	changed	WBGENE00004854|slt-1
GO:0060284	regulation_of_cell_development	SLT-1	changed	WBGENE00004854|slt-1
GO:0045596	negative_regulation_of_cell_differentiation	SLT-1	changed	WBGENE00004854|slt-1
GO:0045168	cell-cell_signaling_involved_in_cell_fate_commitment	TIR-1	changed	WBGENE00006575|tir-1
GO:0055001	muscle_cell_development	TTN-1	changed	WBGENE00006436|ttn-1
GO:0051146	striated_muscle_cell_differentiation	TTN-1	changed	WBGENE00006436|ttn-1
GO:0009967	positive_regulation_of_signal_transduction	TIR-1	changed	WBGENE00006575|tir-1
GO:1902531	regulation_of_intracellular_signal_transduction	TIR-1	changed	WBGENE00006575|tir-1
GO:0007218	neuropeptide_signaling_pathway	NLP-20	changed	WBGENE00003758|nlp-20
GO:0035385	Roundabout_signaling_pathway	SLT-1	changed	WBGENE00004854|slt-1
GO:0007167	enzyme_linked_receptor_protein_signaling_pathway	AC3.12	changed	AC3.12|WBGENE00077503
GO:0099537	trans-synaptic_signaling	SYD-2	changed	WBGENE00006364|syd-2
GO:0030334	regulation_of_cell_migration	CED-12	changed	WBGENE00000426|ced-12
GO:0046390	ribose_phosphate_biosynthetic_process	F10F2.2	changed	F10F2.2|WBGENE00008654
GO:0032268	regulation_of_cellular_protein_metabolic_process	TIR-1	changed	WBGENE00006575|tir-1
GO:0006464	cellular_protein_modification_process	TTN-1	changed	WBGENE00006436|ttn-1
GO:0006464	cellular_protein_modification_process	TIR-1	changed	WBGENE00006575|tir-1
GO:0006464	cellular_protein_modification_process	C17H12.3	changed	C17H12.3|WBGENE00015929
GO:0006464	cellular_protein_modification_process	Y54F10BM.3	changed	WBGENE00021858|Y54F10BM.3
GO:0006464	cellular_protein_modification_process	PPFR-1	changed	WBGENE00008878|ppfr-1
GO:0006464	cellular_protein_modification_process	Y106G6D.4	changed	WBGENE00013701|Y106G6D.4
GO:0006464	cellular_protein_modification_process	MATH-33	changed	WBGENE00010406|math-33
GO:0006464	cellular_protein_modification_process	PPH-4.1	changed	WBGENE00004085|pph-4.1
GO:0006464	cellular_protein_modification_process	SET-29	changed	WBGENE00022371|set-29
GO:0044257	cellular_protein_catabolic_process	Y16B4A.2	changed	WBGENE00012445|Y16B4A.2
GO:0016070	RNA_metabolic_process	TIR-1	changed	WBGENE00006575|tir-1
GO:0016070	RNA_metabolic_process	Y82E9BR.2	changed	WBGENE00022335|Y82E9BR.2
GO:0016070	RNA_metabolic_process	FKH-9	changed	WBGENE00001441|fkh-9
GO:0006753	nucleoside_phosphate_metabolic_process	F10F2.2	changed	F10F2.2|WBGENE00008654
GO:0006753	nucleoside_phosphate_metabolic_process	ATIC-1	changed	WBGENE00016957|atic-1
GO:0048232	male_gamete_generation	FER-1	changed	WBGENE00001414|fer-1
GO:0006906	vesicle_fusion	Y34B4A.2	changed	WBGENE00021319|Y34B4A.2
GO:0051784	negative_regulation_of_nuclear_division	PPFR-1	changed	WBGENE00008878|ppfr-1
GO:0040020	regulation_of_meiotic_nuclear_division	PPFR-1	changed	WBGENE00008878|ppfr-1
GO:0045132	meiotic_chromosome_segregation	PPFR-1	changed	WBGENE00008878|ppfr-1
GO:0031034	myosin_filament_assembly	TTN-1	changed	WBGENE00006436|ttn-1
GO:0051231	spindle_elongation	PPFR-1	changed	WBGENE00008878|ppfr-1
GO:0007052	mitotic_spindle_organization	PPH-4.1	changed	WBGENE00004085|pph-4.1
GO:0000212	meiotic_spindle_organization	PPFR-1	changed	WBGENE00008878|ppfr-1
GO:0070507	regulation_of_microtubule_cytoskeleton_organization	PPFR-1	changed	WBGENE00008878|ppfr-1
GO:0051494	negative_regulation_of_cytoskeleton_organization	PPFR-1	changed	WBGENE00008878|ppfr-1
GO:0042325	regulation_of_phosphorylation	TIR-1	changed	WBGENE00006575|tir-1
GO:0045937	positive_regulation_of_phosphate_metabolic_process	TIR-1	changed	WBGENE00006575|tir-1
GO:0010508	positive_regulation_of_autophagy	Y34B4A.2	changed	WBGENE00021319|Y34B4A.2
GO:0048489	synaptic_vesicle_transport	SYD-2	changed	WBGENE00006364|syd-2
GO:1903651	positive_regulation_of_cytoplasmic_transport	SYD-2	changed	WBGENE00006364|syd-2
GO:0099518	vesicle_cytoskeletal_trafficking	SYD-2	changed	WBGENE00006364|syd-2
GO:0072384	organelle_transport_along_microtubule	SYD-2	changed	WBGENE00006364|syd-2
GO:0008088	axo-dendritic_transport	SYD-2	changed	WBGENE00006364|syd-2
GO:0051168	nuclear_export	Y82E9BR.2	changed	WBGENE00022335|Y82E9BR.2
GO:0050658	RNA_transport	Y82E9BR.2	changed	WBGENE00022335|Y82E9BR.2
GO:0098660	inorganic_ion_transmembrane_transport	TWK-17	changed	WBGENE00006671|twk-17
GO:0098655	cation_transmembrane_transport	TWK-17	changed	WBGENE00006671|twk-17
GO:0030001	metal_ion_transport	TWK-17	changed	WBGENE00006671|twk-17
GO:0015672	monovalent_inorganic_cation_transport	TWK-17	changed	WBGENE00006671|twk-17
GO:0006911	phagocytosis,_engulfment	CED-12	changed	WBGENE00000426|ced-12
GO:0043277	apoptotic_cell_clearance	CED-12	changed	WBGENE00000426|ced-12
GO:0050829	defense_response_to_Gram-negative_bacterium	TIR-1	changed	WBGENE00006575|tir-1
GO:0006520	cellular_amino_acid_metabolic_process	F10F2.2	changed	F10F2.2|WBGENE00008654
GO:0008406	gonad_development	CED-12	changed	WBGENE00000426|ced-12
GO:0051961	negative_regulation_of_nervous_system_development	SLT-1	changed	WBGENE00004854|slt-1
GO:0048699	generation_of_neurons	SLT-1	changed	WBGENE00004854|slt-1
GO:0048699	generation_of_neurons	TIR-1	changed	WBGENE00006575|tir-1
GO:0010769	regulation_of_cell_morphogenesis_involved_in_differentiation	SLT-1	changed	WBGENE00004854|slt-1
GO:0010721	negative_regulation_of_cell_development	SLT-1	changed	WBGENE00004854|slt-1
GO:0055002	striated_muscle_cell_development	TTN-1	changed	WBGENE00006436|ttn-1
GO:1902533	positive_regulation_of_intracellular_signal_transduction	TIR-1	changed	WBGENE00006575|tir-1
GO:0007178	transmembrane_receptor_protein_serine/threonine_kinase_signaling_pathway	AC3.12	changed	AC3.12|WBGENE00077503
GO:0098916	anterograde_trans-synaptic_signaling	SYD-2	changed	WBGENE00006364|syd-2
GO:0032270	positive_regulation_of_cellular_protein_metabolic_process	TIR-1	changed	WBGENE00006575|tir-1
GO:0031399	regulation_of_protein_modification_process	TIR-1	changed	WBGENE00006575|tir-1
GO:0070647	protein_modification_by_small_protein_conjugation_or_removal	MATH-33	changed	WBGENE00010406|math-33
GO:0018193	peptidyl-amino_acid_modification	SET-29	changed	WBGENE00022371|set-29
GO:0008213	protein_alkylation	SET-29	changed	WBGENE00022371|set-29
GO:0006470	protein_dephosphorylation	C17H12.3	changed	C17H12.3|WBGENE00015929
GO:0006470	protein_dephosphorylation	Y54F10BM.3	changed	WBGENE00021858|Y54F10BM.3
GO:0006470	protein_dephosphorylation	PPFR-1	changed	WBGENE00008878|ppfr-1
GO:0006470	protein_dephosphorylation	PPH-4.1	changed	WBGENE00004085|pph-4.1
GO:0006468	protein_phosphorylation	TTN-1	changed	WBGENE00006436|ttn-1
GO:0006468	protein_phosphorylation	TIR-1	changed	WBGENE00006575|tir-1
GO:0006468	protein_phosphorylation	Y106G6D.4	changed	WBGENE00013701|Y106G6D.4
GO:0051603	proteolysis_involved_in_cellular_protein_catabolic_process	Y16B4A.2	changed	WBGENE00012445|Y16B4A.2
GO:0051252	regulation_of_RNA_metabolic_process	TIR-1	changed	WBGENE00006575|tir-1
GO:0051252	regulation_of_RNA_metabolic_process	FKH-9	changed	WBGENE00001441|fkh-9
GO:0032774	RNA_biosynthetic_process	TIR-1	changed	WBGENE00006575|tir-1
GO:0032774	RNA_biosynthetic_process	FKH-9	changed	WBGENE00001441|fkh-9
GO:0016071	mRNA_metabolic_process	Y82E9BR.2	changed	WBGENE00022335|Y82E9BR.2
GO:0006396	RNA_processing	Y82E9BR.2	changed	WBGENE00022335|Y82E9BR.2
GO:1901293	nucleoside_phosphate_biosynthetic_process	F10F2.2	changed	F10F2.2|WBGENE00008654
GO:1901293	nucleoside_phosphate_biosynthetic_process	ATIC-1	changed	WBGENE00016957|atic-1
GO:0009123	nucleoside_monophosphate_metabolic_process	F10F2.2	changed	F10F2.2|WBGENE00008654
GO:0009117	nucleotide_metabolic_process	F10F2.2	changed	F10F2.2|WBGENE00008654
GO:0009117	nucleotide_metabolic_process	ATIC-1	changed	WBGENE00016957|atic-1
GO:0007283	spermatogenesis	FER-1	changed	WBGENE00001414|fer-1
GO:0035493	SNARE_complex_assembly	Y34B4A.2	changed	WBGENE00021319|Y34B4A.2
GO:0045835	negative_regulation_of_meiotic_nuclear_division	PPFR-1	changed	WBGENE00008878|ppfr-1
GO:0051232	meiotic_spindle_elongation	PPFR-1	changed	WBGENE00008878|ppfr-1
GO:0090224	regulation_of_spindle_organization	PPFR-1	changed	WBGENE00008878|ppfr-1
GO:0043549	regulation_of_kinase_activity	TIR-1	changed	WBGENE00006575|tir-1
GO:0001932	regulation_of_protein_phosphorylation	TIR-1	changed	WBGENE00006575|tir-1
GO:0042327	positive_regulation_of_phosphorylation	TIR-1	changed	WBGENE00006575|tir-1
GO:1902803	regulation_of_synaptic_vesicle_transport	SYD-2	changed	WBGENE00006364|syd-2
GO:0099514	synaptic_vesicle_cytoskeletal_transport	SYD-2	changed	WBGENE00006364|syd-2
GO:0047496	vesicle_transport_along_microtubule	SYD-2	changed	WBGENE00006364|syd-2
GO:1902513	regulation_of_organelle_transport_along_microtubule	SYD-2	changed	WBGENE00006364|syd-2
GO:0008089	anterograde_axonal_transport	SYD-2	changed	WBGENE00006364|syd-2
GO:0071426	ribonucleoprotein_complex_export_from_nucleus	Y82E9BR.2	changed	WBGENE00022335|Y82E9BR.2
GO:0006405	RNA_export_from_nucleus	Y82E9BR.2	changed	WBGENE00022335|Y82E9BR.2
GO:0051028	mRNA_transport	Y82E9BR.2	changed	WBGENE00022335|Y82E9BR.2
GO:0098662	inorganic_cation_transmembrane_transport	TWK-17	changed	WBGENE00006671|twk-17
GO:0006813	potassium_ion_transport	TWK-17	changed	WBGENE00006671|twk-17
GO:0060097	cytoskeletal_rearrangement_involved_in_phagocytosis,_engulfment	CED-12	changed	WBGENE00000426|ced-12
GO:0043652	engulfment_of_apoptotic_cell	CED-12	changed	WBGENE00000426|ced-12
GO:1901605	alpha-amino_acid_metabolic_process	F10F2.2	changed	F10F2.2|WBGENE00008654
GO:0035262	gonad_morphogenesis	CED-12	changed	WBGENE00000426|ced-12
GO:0050767	regulation_of_neurogenesis	SLT-1	changed	WBGENE00004854|slt-1
GO:0030182	neuron_differentiation	SLT-1	changed	WBGENE00004854|slt-1
GO:0030182	neuron_differentiation	TIR-1	changed	WBGENE00006575|tir-1
GO:0001764	neuron_migration	SLT-1	changed	WBGENE00004854|slt-1
GO:0010771	negative_regulation_of_cell_morphogenesis_involved_in_differentiation	SLT-1	changed	WBGENE00004854|slt-1
GO:0030239	myofibril_assembly	TTN-1	changed	WBGENE00006436|ttn-1
GO:0007268	synaptic_transmission	SYD-2	changed	WBGENE00006364|syd-2
GO:0031401	positive_regulation_of_protein_modification_process	TIR-1	changed	WBGENE00006575|tir-1
GO:0070646	protein_modification_by_small_protein_removal	MATH-33	changed	WBGENE00010406|math-33
GO:0018205	peptidyl-lysine_modification	SET-29	changed	WBGENE00022371|set-29
GO:0006479	protein_methylation	SET-29	changed	WBGENE00022371|set-29
GO:0035335	peptidyl-tyrosine_dephosphorylation	C17H12.3	changed	C17H12.3|WBGENE00015929
GO:0035335	peptidyl-tyrosine_dephosphorylation	Y54F10BM.3	changed	WBGENE00021858|Y54F10BM.3
GO:0023014	signal_transduction_by_protein_phosphorylation	TIR-1	changed	WBGENE00006575|tir-1
GO:2001141	regulation_of_RNA_biosynthetic_process	TIR-1	changed	WBGENE00006575|tir-1
GO:2001141	regulation_of_RNA_biosynthetic_process	FKH-9	changed	WBGENE00001441|fkh-9
GO:0051254	positive_regulation_of_RNA_metabolic_process	TIR-1	changed	WBGENE00006575|tir-1
GO:0097659	nucleic_acid-templated_transcription	TIR-1	changed	WBGENE00006575|tir-1
GO:0097659	nucleic_acid-templated_transcription	FKH-9	changed	WBGENE00001441|fkh-9
GO:0006397	mRNA_processing	Y82E9BR.2	changed	WBGENE00022335|Y82E9BR.2
GO:0008380	RNA_splicing	Y82E9BR.2	changed	WBGENE00022335|Y82E9BR.2
GO:0009165	nucleotide_biosynthetic_process	F10F2.2	changed	F10F2.2|WBGENE00008654
GO:0009165	nucleotide_biosynthetic_process	ATIC-1	changed	WBGENE00016957|atic-1
GO:0009124	nucleoside_monophosphate_biosynthetic_process	F10F2.2	changed	F10F2.2|WBGENE00008654
GO:0009161	ribonucleoside_monophosphate_metabolic_process	F10F2.2	changed	F10F2.2|WBGENE00008654
GO:0009126	purine_nucleoside_monophosphate_metabolic_process	F10F2.2	changed	F10F2.2|WBGENE00008654
GO:0009259	ribonucleotide_metabolic_process	F10F2.2	changed	F10F2.2|WBGENE00008654
GO:0006163	purine_nucleotide_metabolic_process	F10F2.2	changed	F10F2.2|WBGENE00008654
GO:0006163	purine_nucleotide_metabolic_process	ATIC-1	changed	WBGENE00016957|atic-1
GO:0032887	regulation_of_spindle_elongation	PPFR-1	changed	WBGENE00008878|ppfr-1
GO:0045859	regulation_of_protein_kinase_activity	TIR-1	changed	WBGENE00006575|tir-1
GO:0033674	positive_regulation_of_kinase_activity	TIR-1	changed	WBGENE00006575|tir-1
GO:0001934	positive_regulation_of_protein_phosphorylation	TIR-1	changed	WBGENE00006575|tir-1
GO:0099517	synaptic_vesicle_transport_along_microtubule	SYD-2	changed	WBGENE00006364|syd-2
GO:1901608	regulation_of_vesicle_transport_along_microtubule	SYD-2	changed	WBGENE00006364|syd-2
GO:0071427	mRNA-containing_ribonucleoprotein_complex_export_from_nucleus	Y82E9BR.2	changed	WBGENE00022335|Y82E9BR.2
GO:0071804	cellular_potassium_ion_transport	TWK-17	changed	WBGENE00006671|twk-17
GO:0009064	glutamine_family_amino_acid_metabolic_process	F10F2.2	changed	F10F2.2|WBGENE00008654
GO:0050768	negative_regulation_of_neurogenesis	SLT-1	changed	WBGENE00004854|slt-1
GO:0045664	regulation_of_neuron_differentiation	SLT-1	changed	WBGENE00004854|slt-1
GO:0048666	neuron_development	SLT-1	changed	WBGENE00004854|slt-1
GO:0048666	neuron_development	TIR-1	changed	WBGENE00006575|tir-1
GO:0071688	striated_muscle_myosin_thick_filament_assembly	TTN-1	changed	WBGENE00006436|ttn-1
GO:0045214	sarcomere_organization	TTN-1	changed	WBGENE00006436|ttn-1
GO:0050804	modulation_of_synaptic_transmission	SYD-2	changed	WBGENE00006364|syd-2
GO:0007274	neuromuscular_synaptic_transmission	SYD-2	changed	WBGENE00006364|syd-2
GO:0016579	protein_deubiquitination	MATH-33	changed	WBGENE00010406|math-33
GO:0018022	peptidyl-lysine_methylation	SET-29	changed	WBGENE00022371|set-29
GO:0000165	MAPK_cascade	TIR-1	changed	WBGENE00006575|tir-1
GO:1902680	positive_regulation_of_RNA_biosynthetic_process	TIR-1	changed	WBGENE00006575|tir-1
GO:1903506	regulation_of_nucleic_acid-templated_transcription	TIR-1	changed	WBGENE00006575|tir-1
GO:1903506	regulation_of_nucleic_acid-templated_transcription	FKH-9	changed	WBGENE00001441|fkh-9
GO:0006351	transcription,_DNA-templated	TIR-1	changed	WBGENE00006575|tir-1
GO:0006351	transcription,_DNA-templated	FKH-9	changed	WBGENE00001441|fkh-9
GO:0000375	RNA_splicing,_via_transesterification_reactions	Y82E9BR.2	changed	WBGENE00022335|Y82E9BR.2
GO:0009156	ribonucleoside_monophosphate_biosynthetic_process	F10F2.2	changed	F10F2.2|WBGENE00008654
GO:0009127	purine_nucleoside_monophosphate_biosynthetic_process	F10F2.2	changed	F10F2.2|WBGENE00008654
GO:0009167	purine_ribonucleoside_monophosphate_metabolic_process	F10F2.2	changed	F10F2.2|WBGENE00008654
GO:0009260	ribonucleotide_biosynthetic_process	F10F2.2	changed	F10F2.2|WBGENE00008654
GO:0009150	purine_ribonucleotide_metabolic_process	F10F2.2	changed	F10F2.2|WBGENE00008654
GO:0006164	purine_nucleotide_biosynthetic_process	F10F2.2	changed	F10F2.2|WBGENE00008654
GO:0006164	purine_nucleotide_biosynthetic_process	ATIC-1	changed	WBGENE00016957|atic-1
GO:1902119	regulation_of_meiotic_spindle_elongation	PPFR-1	changed	WBGENE00008878|ppfr-1
GO:0071900	regulation_of_protein_serine/threonine_kinase_activity	TIR-1	changed	WBGENE00006575|tir-1
GO:0045860	positive_regulation_of_protein_kinase_activity	TIR-1	changed	WBGENE00006575|tir-1
GO:0048490	anterograde_synaptic_vesicle_transport	SYD-2	changed	WBGENE00006364|syd-2
GO:1901610	positive_regulation_of_vesicle_transport_along_microtubule	SYD-2	changed	WBGENE00006364|syd-2
GO:0006406	mRNA_export_from_nucleus	Y82E9BR.2	changed	WBGENE00022335|Y82E9BR.2
GO:0071805	potassium_ion_transmembrane_transport	TWK-17	changed	WBGENE00006671|twk-17
GO:0006541	glutamine_metabolic_process	F10F2.2	changed	F10F2.2|WBGENE00008654
GO:0045665	negative_regulation_of_neuron_differentiation	SLT-1	changed	WBGENE00004854|slt-1
GO:0048667	cell_morphogenesis_involved_in_neuron_differentiation	SLT-1	changed	WBGENE00004854|slt-1
GO:0048667	cell_morphogenesis_involved_in_neuron_differentiation	TIR-1	changed	WBGENE00006575|tir-1
GO:0031175	neuron_projection_development	SLT-1	changed	WBGENE00004854|slt-1
GO:0031175	neuron_projection_development	TIR-1	changed	WBGENE00006575|tir-1
GO:0050806	positive_regulation_of_synaptic_transmission	SYD-2	changed	WBGENE00006364|syd-2
GO:0018026	peptidyl-lysine_monomethylation	SET-29	changed	WBGENE00022371|set-29
GO:0018023	peptidyl-lysine_trimethylation	SET-29	changed	WBGENE00022371|set-29
GO:0043408	regulation_of_MAPK_cascade	TIR-1	changed	WBGENE00006575|tir-1
GO:1903508	positive_regulation_of_nucleic_acid-templated_transcription	TIR-1	changed	WBGENE00006575|tir-1
GO:0006355	regulation_of_transcription,_DNA-templated	TIR-1	changed	WBGENE00006575|tir-1
GO:0006355	regulation_of_transcription,_DNA-templated	FKH-9	changed	WBGENE00001441|fkh-9
GO:0006366	transcription_from_RNA_polymerase_II_promoter	TIR-1	changed	WBGENE00006575|tir-1
GO:0006366	transcription_from_RNA_polymerase_II_promoter	FKH-9	changed	WBGENE00001441|fkh-9
GO:0000377	RNA_splicing,_via_transesterification_reactions_with_bulged_adenosine_as_nucleophile	Y82E9BR.2	changed	WBGENE00022335|Y82E9BR.2
GO:0009168	purine_ribonucleoside_monophosphate_biosynthetic_process	F10F2.2	changed	F10F2.2|WBGENE00008654
GO:0046040	IMP_metabolic_process	F10F2.2	changed	F10F2.2|WBGENE00008654
GO:0009152	purine_ribonucleotide_biosynthetic_process	F10F2.2	changed	F10F2.2|WBGENE00008654
GO:1902120	negative_regulation_of_meiotic_spindle_elongation	PPFR-1	changed	WBGENE00008878|ppfr-1
GO:0071902	positive_regulation_of_protein_serine/threonine_kinase_activity	TIR-1	changed	WBGENE00006575|tir-1
GO:0043405	regulation_of_MAP_kinase_activity	TIR-1	changed	WBGENE00006575|tir-1
GO:0032147	activation_of_protein_kinase_activity	TIR-1	changed	WBGENE00006575|tir-1
GO:1903742	regulation_of_anterograde_synaptic_vesicle_transport	SYD-2	changed	WBGENE00006364|syd-2
GO:0048812	neuron_projection_morphogenesis	SLT-1	changed	WBGENE00004854|slt-1
GO:0048812	neuron_projection_morphogenesis	TIR-1	changed	WBGENE00006575|tir-1
GO:0010975	regulation_of_neuron_projection_development	SLT-1	changed	WBGENE00004854|slt-1
GO:0061564	axon_development	SLT-1	changed	WBGENE00004854|slt-1
GO:0061564	axon_development	TIR-1	changed	WBGENE00006575|tir-1
GO:1902805	positive_regulation_of_synaptic_vesicle_transport	SYD-2	changed	WBGENE00006364|syd-2
GO:0043410	positive_regulation_of_MAPK_cascade	TIR-1	changed	WBGENE00006575|tir-1
GO:0045893	positive_regulation_of_transcription,_DNA-templated	TIR-1	changed	WBGENE00006575|tir-1
GO:0006357	regulation_of_transcription_from_RNA_polymerase_II_promoter	TIR-1	changed	WBGENE00006575|tir-1
GO:0006357	regulation_of_transcription_from_RNA_polymerase_II_promoter	FKH-9	changed	WBGENE00001441|fkh-9
GO:0000398	mRNA_splicing,_via_spliceosome	Y82E9BR.2	changed	WBGENE00022335|Y82E9BR.2
GO:0006188	IMP_biosynthetic_process	F10F2.2	changed	F10F2.2|WBGENE00008654
GO:0043406	positive_regulation_of_MAP_kinase_activity	TIR-1	changed	WBGENE00006575|tir-1
GO:1903744	positive_regulation_of_anterograde_synaptic_vesicle_transport	SYD-2	changed	WBGENE00006364|syd-2
GO:1990138	neuron_projection_extension	SLT-1	changed	WBGENE00004854|slt-1
GO:0097485	neuron_projection_guidance	SLT-1	changed	WBGENE00004854|slt-1
GO:0097485	neuron_projection_guidance	TIR-1	changed	WBGENE00006575|tir-1
GO:0010977	negative_regulation_of_neuron_projection_development	SLT-1	changed	WBGENE00004854|slt-1
GO:0007409	axonogenesis	SLT-1	changed	WBGENE00004854|slt-1
GO:0007409	axonogenesis	TIR-1	changed	WBGENE00006575|tir-1
GO:0045944	positive_regulation_of_transcription_from_RNA_polymerase_II_promoter	TIR-1	changed	WBGENE00006575|tir-1
GO:0006189	'de_novo'_IMP_biosynthetic_process	F10F2.2	changed	F10F2.2|WBGENE00008654
GO:0000187	activation_of_MAPK_activity	TIR-1	changed	WBGENE00006575|tir-1
GO:1902284	neuron_projection_extension_involved_in_neuron_projection_guidance	SLT-1	changed	WBGENE00004854|slt-1
GO:0048675	axon_extension	SLT-1	changed	WBGENE00004854|slt-1
GO:0007411	axon_guidance	SLT-1	changed	WBGENE00004854|slt-1
GO:0007411	axon_guidance	TIR-1	changed	WBGENE00006575|tir-1
GO:0050770	regulation_of_axonogenesis	SLT-1	changed	WBGENE00004854|slt-1
GO:1902097	positive_regulation_of_transcription_from_RNA_polymerase_II_promoter_involved_in_defense_response_to_Gram-negative_bacterium	TIR-1	changed	WBGENE00006575|tir-1
GO:0048846	axon_extension_involved_in_axon_guidance	SLT-1	changed	WBGENE00004854|slt-1
GO:0033563	dorsal/ventral_axon_guidance	SLT-1	changed	WBGENE00004854|slt-1
GO:1902667	regulation_of_axon_guidance	SLT-1	changed	WBGENE00004854|slt-1
GO:0050771	negative_regulation_of_axonogenesis	SLT-1	changed	WBGENE00004854|slt-1
GO:0030516	regulation_of_axon_extension	SLT-1	changed	WBGENE00004854|slt-1
GO:0048841	regulation_of_axon_extension_involved_in_axon_guidance	SLT-1	changed	WBGENE00004854|slt-1
GO:1902668	negative_regulation_of_axon_guidance	SLT-1	changed	WBGENE00004854|slt-1
GO:0030517	negative_regulation_of_axon_extension	SLT-1	changed	WBGENE00004854|slt-1
GO:0048843	negative_regulation_of_axon_extension_involved_in_axon_guidance	SLT-1	changed	WBGENE00004854|slt-1

## Sheet: Cellular Component gas-1 RC
GO ID	Total	Under	Over	Change	P-Value (Under)	P-Value (Over)	P-Value (Changed)	FDR (Under)	FDR (Over)	FDR (Changed)	Term
97445	1	0	0	1	1	1	0.0023	0	0	0.665	presynaptic active zone dense projection
70274	3	0	0	1	1	1	0.0069	0	0	0.5523	RES complex
32045	3	0	0	1	1	1	0.0069	0	0	0.5523	guanyl-nucleotide exchange factor complex
31260	3	0	0	1	1	1	0.0069	0	0	0.5523	pseudopodium membrane
30018	7	0	0	1	1	1	0.0161	0	0	1.0064	Z disc
5859	10	0	0	1	1	1	0.0229	0	0	1.1092	muscle myosin complex
32809	12	0	0	1	1	1	0.0274	0	0	0.9625	neuronal cell body membrane
16460	12	0	0	1	1	1	0.0274	0	0	0.9625	myosin II complex
31674	13	0	0	1	1	1	0.0297	0	0	0.9188	I band
48786	14	0	0	1	1	1	0.0319	0	0	0.8025	presynaptic active zone
44298	14	0	0	1	1	1	0.0319	0	0	0.8025	cell body membrane
97458	308	0	0	3	1	1	0.0331	0	0	0.7473	neuron part
30424	134	0	0	2	1	1	0.038	0	0	0.771	axon
5865	18	0	0	1	1	1	0.0408	0	0	0.7441	striated muscle thin filament
5686	18	0	0	1	1	1	0.0408	0	0	0.7441	U2 snRNP
42995	347	0	0	3	1	1	0.0447	0	0	0.7315	cell projection
71011	21	0	0	1	1	1	0.0475	0	0	0.741	precatalytic spliceosome
31143	25	0	0	1	1	1	0.0563	0	0	0.7818	pseudopodium
36379	26	0	0	1	1	1	0.0585	0	0	0.7597	myofilament
31430	28	0	0	1	1	1	0.0628	0	0	0.7825	M band
31253	31	0	0	1	1	1	0.0693	0	0	0.7584	cell projection membrane
16459	31	0	0	1	1	1	0.0693	0	0	0.7584	myosin complex
31672	33	0	0	1	1	1	0.0736	0	0	0.7561	A band
71013	38	0	0	1	1	1	0.0843	0	0	0.7443	catalytic step 2 spliceosome
43005	227	0	0	2	1	1	0.096	0	0	0.7501	neuron projection
98589	231	0	0	2	1	1	0.0989	0	0	0.7403	membrane region
97525	52	0	0	1	1	1	0.1136	0	0	0.7915	spliceosomal snRNP complex
98793	53	0	0	1	1	1	0.1157	0	0	0.7603	presynapse
30532	53	0	0	1	1	1	0.1157	0	0	0.7603	small nuclear ribonucleoprotein complex
98857	56	0	0	1	1	1	0.1218	0	0	0.7411	membrane microdomain
45121	56	0	0	1	1	1	0.1218	0	0	0.7411	membrane raft
5578	58	0	0	1	1	1	0.1259	0	0	0.7447	proteinaceous extracellular matrix
44430	276	0	0	2	1	1	0.1328	0	0	0.7577	cytoskeletal part
5813	66	0	0	1	1	1	0.142	0	0	0.7689	centrosome
31012	67	0	0	1	1	1	0.144	0	0	0.7531	extracellular matrix
31301	70	0	0	1	1	1	0.15	0	0	0.7511	integral component of organelle membrane
31300	72	0	0	1	1	1	0.1539	0	0	0.7485	intrinsic component of organelle membrane
5768	79	0	0	1	1	1	0.1676	0	0	0.7824	endosome
5737	2786	0	0	9	1	1	0.1714	0	0	0.7695	cytoplasm
30017	81	0	0	1	1	1	0.1715	0	0	0.7616	sarcomere
5681	83	0	0	1	1	1	0.1754	0	0	0.7418	spliceosomal complex
323	83	0	0	1	1	1	0.1754	0	0	0.7418	lytic vacuole
44463	86	0	0	1	1	1	0.1811	0	0	0.7383	cell projection part
30016	89	0	0	1	1	1	0.1868	0	0	0.7274	myofibril
5815	89	0	0	1	1	1	0.1868	0	0	0.7274	microtubule organizing center
15629	91	0	0	1	1	1	0.1906	0	0	0.7248	actin cytoskeleton
98805	368	0	0	2	1	1	0.2084	0	0	0.738	whole membrane
5856	371	0	0	2	1	1	0.211	0	0	0.7282	cytoskeleton
44456	104	0	0	1	1	1	0.2148	0	0	0.7385	synapse part
5730	119	0	0	1	1	1	0.2419	0	0	0.7661	nucleolus
44449	139	0	0	1	1	1	0.2766	0	0	0.8312	contractile fiber part
43025	151	0	0	1	1	1	0.2966	0	0	0.8514	neuronal cell body
43292	152	0	0	1	1	1	0.2983	0	0	0.8442	contractile fiber
44297	164	0	0	1	1	1	0.3178	0	0	0.859	cell body
98590	175	0	0	1	1	1	0.3352	0	0	0.8665	plasma membrane region
36477	179	0	0	1	1	1	0.3414	0	0	0.8637	somatodendritic compartment
5773	181	0	0	1	1	1	0.3445	0	0	0.8532	vacuole
15630	184	0	0	1	1	1	0.3491	0	0	0.8433	microtubule cytoskeleton
45202	186	0	0	1	1	1	0.3522	0	0	0.8436	synapse
30054	191	0	0	1	1	1	0.3598	0	0	0.8437	cell junction
44424	4630	0	0	12	1	1	0.3704	0	0	0.8458	intracellular part
44428	638	0	0	2	1	1	0.4387	0	0	0.8709	nuclear part
44422	1878	0	0	5	1	1	0.4435	0	0	0.8659	organelle part
5615	251	0	0	1	1	1	0.4444	0	0	0.8626	extracellular space
5887	646	0	0	2	1	1	0.4451	0	0	0.8535	integral component of plasma membrane
31226	651	0	0	2	1	1	0.4492	0	0	0.8496	intrinsic component of plasma membrane
5622	4853	0	0	12	1	1	0.4521	0	0	0.8394	intracellular
44464	5815	0	0	14	1	1	0.4926	0	0	0.8584	cell part
43232	1135	0	0	3	1	1	0.4962	0	0	0.8402	intracellular non-membrane-bounded organelle
43228	1135	0	0	3	1	1	0.4962	0	0	0.8402	non-membrane-bounded organelle
44421	294	0	0	1	1	1	0.4983	0	0	0.8334	extracellular region part
5623	5872	0	0	14	1	1	0.5139	0	0	0.8311	cell
5886	1215	0	0	3	1	1	0.5442	0	0	0.8468	plasma membrane
71944	1293	0	0	3	1	1	0.5887	0	0	0.8701	cell periphery
44446	1754	0	0	4	1	1	0.5954	0	0	0.8613	intracellular organelle part
44459	869	0	0	2	1	1	0.608	0	0	0.8536	plasma membrane part
31981	407	0	0	1	1	1	0.6171	0	0	0.8492	nuclear lumen
1990904	455	0	0	1	1	1	0.6589	0	0	0.8533	ribonucleoprotein complex
30529	455	0	0	1	1	1	0.6589	0	0	0.8533	intracellular ribonucleoprotein complex
5634	1917	0	0	4	1	1	0.6704	0	0	0.8492	nucleus
43234	1461	0	0	3	1	1	0.6755	0	0	0.8411	protein complex
70013	536	0	0	1	1	1	0.7198	0	0	0.8491	intracellular organelle lumen
43226	3865	0	0	8	1	1	0.7205	0	0	0.8407	organelle
43233	538	0	0	1	1	1	0.7211	0	0	0.835	organelle lumen
31090	545	0	0	1	1	1	0.7258	0	0	0.8296	organelle membrane
5576	548	0	0	1	1	1	0.7278	0	0	0.8244	extracellular region
31974	551	0	0	1	1	1	0.7298	0	0	0.8189	membrane-enclosed lumen
16020	6602	0	0	14	1	1	0.7669	0	0	0.8188	membrane
43227	3194	0	0	6	1	1	0.7926	0	0	0.8278	membrane-bounded organelle
12505	660	0	0	1	1	1	0.7932	0	0	0.8223	endomembrane system
43229	3781	0	0	7	1	1	0.8258	0	0	0.8284	intracellular organelle
32991	1876	0	0	3	1	1	0.834	0	0	0.8212	macromolecular complex
44425	6289	0	0	12	1	1	0.8905	0	0	0.8288	membrane part
43231	3170	0	0	5	1	1	0.8973	0	0	0.8222	intracellular membrane-bounded organelle
16021	5956	0	0	11	1	1	0.9054	0	0	0.8166	integral component of membrane
31224	5965	0	0	11	1	1	0.9068	0	0	0.809	intrinsic component of membrane
44444	1961	0	0	2	1	1	0.9562	0	0	0.8188	cytoplasmic part
1990805	1	0	0	0	1	1	1	0	0	0.9738	central cylinder
1990752	4	0	0	0	1	1	1	0	0	0.9923	microtubule end
1990726	4	0	0	0	1	1	1	0	0	0.9923	Lsm1-7-Pat1 complex
1990633	2	0	0	0	1	1	1	0	0	0.9932	mutator focus
1990429	1	0	0	0	1	1	1	0	0	0.9738	peroxisomal importomer complex
1990423	1	0	0	0	1	1	1	0	0	0.9738	RZZ complex
1990415	1	0	0	0	1	1	1	0	0	0.9738	Pex17p-Pex14p docking complex
1990391	8	0	0	0	1	1	1	0	0	0.9496	DNA repair complex
1990385	1	0	0	0	1	1	1	0	0	0.9738	meiotic spindle midzone
1990357	3	0	0	0	1	1	1	0	0	0.9983	terminal web
1990351	125	0	0	0	1	1	1	0	0	0.9737	transporter complex
1990316	2	0	0	0	1	1	1	0	0	0.9932	ATG1/ULK1 kinase complex
1990246	1	0	0	0	1	1	1	0	0	0.9738	uniplex complex
1990234	213	0	0	0	1	1	1	0	0	0.9926	transferase complex
1990204	31	0	0	0	1	1	1	0	0	0.943	oxidoreductase complex
1990184	3	0	0	0	1	1	1	0	0	0.9983	amino acid transport complex
1990131	2	0	0	0	1	1	1	0	0	0.9932	Gtr1-Gtr2 GTPase complex
1990124	4	0	0	0	1	1	1	0	0	0.9923	messenger ribonucleoprotein complex
1990077	3	0	0	0	1	1	1	0	0	0.9983	primosome complex
1990075	10	0	0	0	1	1	1	0	0	0.9911	periciliary membrane compartment
1990072	1	0	0	0	1	1	1	0	0	0.9738	TRAPPIII protein complex
1990071	1	0	0	0	1	1	1	0	0	0.9738	TRAPPII protein complex
1990023	5	0	0	0	1	1	1	0	0	0.9933	mitotic spindle midzone
1904949	3	0	0	0	1	1	1	0	0	0.9983	ATPase complex
1903293	13	0	0	0	1	1	1	0	0	0.9935	phosphatase complex
1903095	2	0	0	0	1	1	1	0	0	0.9932	ribonuclease III complex
1902911	21	0	0	0	1	1	1	0	0	0.999	protein kinase complex
1902711	1	0	0	0	1	1	1	0	0	0.9738	GABA-A receptor complex
1902710	1	0	0	0	1	1	1	0	0	0.9738	GABA receptor complex
1902562	10	0	0	0	1	1	1	0	0	0.9911	H4 histone acetyltransferase complex
1902560	1	0	0	0	1	1	1	0	0	0.9738	GMP reductase complex
1902555	6	0	0	0	1	1	1	0	0	0.993	endoribonuclease complex
1902554	20	0	0	0	1	1	1	0	0	0.9894	serine/threonine protein kinase complex
1902495	123	0	0	0	1	1	1	0	0	0.9925	transmembrane transporter complex
1902494	319	0	0	0	1	1	1	0	0	0.9025	catalytic complex
1902493	22	0	0	0	1	1	1	0	0	0.9935	acetyltransferase complex
99738	7	0	0	0	1	1	1	0	0	0.8895	cell cortex region
99572	8	0	0	0	1	1	1	0	0	0.9496	postsynaptic specialization
99568	102	0	0	0	1	1	1	0	0	0.9945	cytoplasmic region
99513	116	0	0	0	1	1	1	0	0	1.0006	polymeric cytoskeletal fiber
99512	116	0	0	0	1	1	1	0	0	1.0006	supramolecular fiber
99503	46	0	0	0	1	1	1	0	0	0.9054	secretory vesicle
99501	12	0	0	0	1	1	1	0	0	0.9996	exocytic vesicle membrane
98862	3	0	0	0	1	1	1	0	0	0.9983	cluster of actin-based cell projections
98859	1	0	0	0	1	1	1	0	0	0.9738	actin filament bundle of actin-based cell projection
98858	7	0	0	0	1	1	1	0	0	0.8895	actin-based cell projection
98852	20	0	0	0	1	1	1	0	0	0.9894	lytic vacuole membrane
98827	3	0	0	0	1	1	1	0	0	0.9983	endoplasmic reticulum subcompartment
98803	15	0	0	0	1	1	1	0	0	0.9987	respiratory chain complex
98802	66	0	0	0	1	1	1	0	0	1.0015	plasma membrane receptor complex
98800	43	0	0	0	1	1	1	0	0	0.8993	inner mitochondrial membrane protein complex
98799	6	0	0	0	1	1	1	0	0	0.993	outer mitochondrial membrane protein complex
98798	54	0	0	0	1	1	1	0	0	1	mitochondrial protein complex
98797	143	0	0	0	1	1	1	0	0	1.0009	plasma membrane protein complex
98796	348	0	0	0	1	1	1	0	0	0.9032	membrane protein complex
98794	51	0	0	0	1	1	1	0	0	0.9109	postsynapse
98791	49	0	0	0	1	1	1	0	0	0.948	Golgi subcompartment
98733	2	0	0	0	1	1	1	0	0	0.9932	hemidesmosome associated protein complex
98687	59	0	0	0	1	1	1	0	0	0.9807	chromosomal region
98651	1	0	0	0	1	1	1	0	0	0.9738	basement membrane collagen trimer
98645	1	0	0	0	1	1	1	0	0	0.9738	collagen network
98644	1	0	0	0	1	1	1	0	0	0.9738	complex of collagen trimers
98642	1	0	0	0	1	1	1	0	0	0.9738	network-forming collagen trimer
98636	6	0	0	0	1	1	1	0	0	0.993	protein complex involved in cell adhesion
98591	1	0	0	0	1	1	1	0	0	0.9738	external side of apical plasma membrane
98588	372	0	0	0	1	1	1	0	0	1.0009	bounding membrane of organelle
98573	12	0	0	0	1	1	1	0	0	0.9996	intrinsic component of mitochondrial membrane
98562	79	0	0	0	1	1	1	0	0	0.9062	cytoplasmic side of membrane
98552	81	0	0	0	1	1	1	0	0	0.9779	side of membrane
98533	3	0	0	0	1	1	1	0	0	0.9983	ATPase dependent transmembrane transport complex
97708	139	0	0	0	1	1	1	0	0	0.9924	intracellular vesicle
97610	17	0	0	0	1	1	1	0	0	1.0001	cell surface furrow
97546	4	0	0	0	1	1	1	0	0	0.9923	ciliary base
97543	3	0	0	0	1	1	1	0	0	0.9983	ciliary inversin compartment
97526	22	0	0	0	1	1	1	0	0	0.9935	spliceosomal tri-snRNP complex
97518	1	0	0	0	1	1	1	0	0	0.9738	parallel actin filament bundle
97517	2	0	0	0	1	1	1	0	0	0.9932	contractile actin filament bundle
97516	1	0	0	0	1	1	1	0	0	0.9738	microvillar actin bundle
97431	1	0	0	0	1	1	1	0	0	0.9738	mitotic spindle pole
97346	2	0	0	0	1	1	1	0	0	0.9932	INO80-type complex
97249	2	0	0	0	1	1	1	0	0	0.9932	mitochondrial respiratory chain supercomplex
97165	1	0	0	0	1	1	1	0	0	0.9738	nuclear stress granule
97149	2	0	0	0	1	1	1	0	0	0.9932	centralspindlin complex
97060	58	0	0	0	1	1	1	0	0	0.9768	synaptic membrane
97038	4	0	0	0	1	1	1	0	0	0.9923	perinuclear endoplasmic reticulum
97014	17	0	0	0	1	1	1	0	0	1.0001	ciliary plasm
90665	10	0	0	0	1	1	1	0	0	0.9911	glycoprotein complex
90619	1	0	0	0	1	1	1	0	0	0.9738	meiotic spindle pole
90576	2	0	0	0	1	1	1	0	0	0.9932	RNA polymerase III transcription factor complex
90575	53	0	0	0	1	1	1	0	0	0.9845	RNA polymerase II transcription factor complex
90571	6	0	0	0	1	1	1	0	0	0.993	RNA polymerase II transcription repressor complex
90568	9	0	0	0	1	1	1	0	0	0.9165	nuclear transcriptional repressor complex
90545	4	0	0	0	1	1	1	0	0	0.9923	CHD-type complex
90544	2	0	0	0	1	1	1	0	0	0.9932	BAF-type complex
90533	3	0	0	0	1	1	1	0	0	0.9983	cation-transporting ATPase complex
89701	1	0	0	0	1	1	1	0	0	0.9738	U2AF
80008	4	0	0	0	1	1	1	0	0	0.9923	Cul4-RING E3 ubiquitin ligase complex
72687	6	0	0	0	1	1	1	0	0	0.993	meiotic spindle
72686	17	0	0	0	1	1	1	0	0	1.0001	mitotic spindle
72669	2	0	0	0	1	1	1	0	0	0.9932	tRNA-splicing ligase complex
72588	3	0	0	0	1	1	1	0	0	0.9983	box H/ACA RNP complex
72546	3	0	0	0	1	1	1	0	0	0.9983	ER membrane protein complex
72379	1	0	0	0	1	1	1	0	0	0.9738	ER membrane insertion complex
72372	82	0	0	0	1	1	1	0	0	1.0006	primary cilium
71986	1	0	0	0	1	1	1	0	0	0.9738	Ragulator complex
71942	1	0	0	0	1	1	1	0	0	0.9738	XPC complex
71819	1	0	0	0	1	1	1	0	0	0.9738	DUBm complex
71818	1	0	0	0	1	1	1	0	0	0.9738	BAT3 complex
71782	3	0	0	0	1	1	1	0	0	0.9983	endoplasmic reticulum tubular network
71595	2	0	0	0	1	1	1	0	0	0.9932	Nem1-Spo7 phosphatase complex
71561	1	0	0	0	1	1	1	0	0	0.9738	nucleus-vacuole junction
71541	1	0	0	0	1	1	1	0	0	0.9738	eukaryotic translation initiation factor 3 complex, eIF3m
71256	2	0	0	0	1	1	1	0	0	0.9932	translocon complex
71203	4	0	0	0	1	1	1	0	0	0.9923	WASH complex
71021	1	0	0	0	1	1	1	0	0	0.9738	U2-type post-spliceosomal complex
71020	2	0	0	0	1	1	1	0	0	0.9932	post-spliceosomal complex
71014	6	0	0	0	1	1	1	0	0	0.993	post-mRNA release spliceosomal complex
71012	8	0	0	0	1	1	1	0	0	0.9496	catalytic step 1 spliceosome
71010	19	0	0	0	1	1	1	0	0	0.9734	prespliceosome
71008	2	0	0	0	1	1	1	0	0	0.9932	U2-type post-mRNA release spliceosomal complex
71007	2	0	0	0	1	1	1	0	0	0.9932	U2-type catalytic step 2 spliceosome
71006	3	0	0	0	1	1	1	0	0	0.9983	U2-type catalytic step 1 spliceosome
71004	14	0	0	0	1	1	1	0	0	1.0017	U2-type prespliceosome
71001	1	0	0	0	1	1	1	0	0	0.9738	U4/U6 snRNP
70993	13	0	0	0	1	1	1	0	0	0.9935	translation preinitiation complex
70985	1	0	0	0	1	1	1	0	0	0.9738	TFIIK complex
70971	4	0	0	0	1	1	1	0	0	0.9923	endoplasmic reticulum exit site
70938	2	0	0	0	1	1	1	0	0	0.9932	contractile ring
70877	2	0	0	0	1	1	1	0	0	0.9932	microprocessor complex
70847	8	0	0	0	1	1	1	0	0	0.9496	core mediator complex
70822	1	0	0	0	1	1	1	0	0	0.9738	Sin3-type complex
70772	1	0	0	0	1	1	1	0	0	0.9738	PAS complex
70765	4	0	0	0	1	1	1	0	0	0.9923	gamma-secretase complex
70603	12	0	0	0	1	1	1	0	0	0.9996	SWI/SNF superfamily-type complex
70545	3	0	0	0	1	1	1	0	0	0.9983	PeBoW complex
70531	2	0	0	0	1	1	1	0	0	0.9932	BRCA1-A complex
70469	37	0	0	0	1	1	1	0	0	0.8451	respiratory chain
70461	2	0	0	0	1	1	1	0	0	0.9932	SAGA-type complex
70449	5	0	0	0	1	1	1	0	0	0.9933	elongin complex
70390	1	0	0	0	1	1	1	0	0	0.9738	transcription export complex 2
70382	35	0	0	0	1	1	1	0	0	0.9952	exocytic vesicle
70176	4	0	0	0	1	1	1	0	0	0.9923	DRM complex
70161	32	0	0	0	1	1	1	0	0	0.9939	anchoring junction
70160	3	0	0	0	1	1	1	0	0	0.9983	occluding junction
70090	7	0	0	0	1	1	1	0	0	0.8895	metaphase plate
70069	5	0	0	0	1	1	1	0	0	0.9933	cytochrome complex
61695	100	0	0	0	1	1	1	0	0	0.996	transferase complex, transferring phosphorus-containing groups
61645	3	0	0	0	1	1	1	0	0	0.9983	endocytic patch
60473	7	0	0	0	1	1	1	0	0	0.8895	cortical granule
60417	2	0	0	0	1	1	1	0	0	0.9932	yolk
60293	61	0	0	0	1	1	1	0	0	1.001	germ plasm
60170	5	0	0	0	1	1	1	0	0	0.9933	ciliary membrane
60111	2	0	0	0	1	1	1	0	0	0.9932	alae of collagen and cuticulin-based cuticle extracellular matrix
60109	1	0	0	0	1	1	1	0	0	0.9738	medial layer of collagen and cuticulin-based cuticle extracellular matrix
60108	1	0	0	0	1	1	1	0	0	0.9738	annular furrow extracellular matrix
60107	2	0	0	0	1	1	1	0	0	0.9932	annuli extracellular matrix
60106	4	0	0	0	1	1	1	0	0	0.9923	cortical layer of collagen and cuticulin-based cuticle extracellular matrix
60103	6	0	0	0	1	1	1	0	0	0.993	collagen and cuticulin-based cuticle extracellular matrix part
60102	16	0	0	0	1	1	1	0	0	0.9765	collagen and cuticulin-based cuticle extracellular matrix
60077	1	0	0	0	1	1	1	0	0	0.9738	inhibitory synapse
60076	10	0	0	0	1	1	1	0	0	0.9911	excitatory synapse
55120	94	0	0	0	1	1	1	0	0	1.0015	striated muscle dense body
55038	2	0	0	0	1	1	1	0	0	0.9932	recycling endosome membrane
55037	18	0	0	0	1	1	1	0	0	0.9958	recycling endosome
55029	71	0	0	0	1	1	1	0	0	0.9933	nuclear DNA-directed RNA polymerase complex
52718	1	0	0	0	1	1	1	0	0	0.9738	tRNA-specific adenosine-34 deaminase complex
51286	1	0	0	0	1	1	1	0	0	0.9738	cell tip
51285	1	0	0	0	1	1	1	0	0	0.9738	cell cortex of cell tip
51233	15	0	0	0	1	1	1	0	0	0.9987	spindle midzone
48787	1	0	0	0	1	1	1	0	0	0.9738	presynaptic active zone membrane
48770	2	0	0	0	1	1	1	0	0	0.9932	pigment granule
48500	7	0	0	0	1	1	1	0	0	0.8895	signal recognition particle
48475	27	0	0	0	1	1	1	0	0	0.9847	coated membrane
48471	75	0	0	0	1	1	1	0	0	0.9156	perinuclear region of cytoplasm
48188	3	0	0	0	1	1	1	0	0	0.9983	Set1C/COMPASS complex
46930	4	0	0	0	1	1	1	0	0	0.9923	pore complex
46658	2	0	0	0	1	1	1	0	0	0.9932	anchored component of plasma membrane
46540	16	0	0	0	1	1	1	0	0	0.9765	U4/U6 x U5 tri-snRNP complex
46536	5	0	0	0	1	1	1	0	0	0.9933	dosage compensation complex
45495	61	0	0	0	1	1	1	0	0	1.001	pole plasm
45335	17	0	0	0	1	1	1	0	0	1.0001	phagocytic vesicle
45334	4	0	0	0	1	1	1	0	0	0.9923	clathrin-coated endocytic vesicle
45298	1	0	0	0	1	1	1	0	0	0.9738	tubulin complex
45283	3	0	0	0	1	1	1	0	0	0.9983	fumarate reductase complex
45281	3	0	0	0	1	1	1	0	0	0.9983	succinate dehydrogenase complex
45277	3	0	0	0	1	1	1	0	0	0.9983	respiratory chain complex IV
45275	2	0	0	0	1	1	1	0	0	0.9932	respiratory chain complex III
45273	3	0	0	0	1	1	1	0	0	0.9983	respiratory chain complex II
45271	7	0	0	0	1	1	1	0	0	0.8895	respiratory chain complex I
45263	9	0	0	0	1	1	1	0	0	0.9165	proton-transporting ATP synthase complex, coupling factor F(o)
45261	8	0	0	0	1	1	1	0	0	0.9496	proton-transporting ATP synthase complex, catalytic core F(1)
45259	19	0	0	0	1	1	1	0	0	0.9734	proton-transporting ATP synthase complex
45257	3	0	0	0	1	1	1	0	0	0.9983	succinate dehydrogenase complex (ubiquinone)
45254	1	0	0	0	1	1	1	0	0	0.9738	pyruvate dehydrogenase complex
45252	3	0	0	0	1	1	1	0	0	0.9983	oxoglutarate dehydrogenase complex
45240	3	0	0	0	1	1	1	0	0	0.9983	dihydrolipoyl dehydrogenase complex
45239	4	0	0	0	1	1	1	0	0	0.9923	tricarboxylic acid cycle enzyme complex
45211	46	0	0	0	1	1	1	0	0	0.9054	postsynaptic membrane
45203	1	0	0	0	1	1	1	0	0	0.9738	integral component of cell outer membrane
45179	6	0	0	0	1	1	1	0	0	0.993	apical cortex
45178	11	0	0	0	1	1	1	0	0	0.99	basal part of cell
45177	71	0	0	0	1	1	1	0	0	0.9933	apical part of cell
45120	4	0	0	0	1	1	1	0	0	0.9923	pronucleus
45111	20	0	0	0	1	1	1	0	0	0.9894	intermediate filament cytoskeleton
44853	2	0	0	0	1	1	1	0	0	0.9932	plasma membrane raft
44841	5	0	0	0	1	1	1	0	0	0.9933	gut granule membrane
44840	6	0	0	0	1	1	1	0	0	0.993	gut granule
44815	92	0	0	0	1	1	1	0	0	1.0005	DNA packaging complex
44798	58	0	0	0	1	1	1	0	0	0.9768	nuclear transcription factor complex
44796	1	0	0	0	1	1	1	0	0	0.9738	DNA polymerase processivity factor complex
44615	1	0	0	0	1	1	1	0	0	0.9738	nuclear pore nuclear basket
44613	2	0	0	0	1	1	1	0	0	0.9932	nuclear pore central transport channel
44611	1	0	0	0	1	1	1	0	0	0.9738	nuclear pore inner ring
44462	1	0	0	0	1	1	1	0	0	0.9738	external encapsulating structure part
44455	57	0	0	0	1	1	1	0	0	0.9936	mitochondrial membrane part
44454	90	0	0	0	1	1	1	0	0	0.9925	nuclear chromosome part
44453	3	0	0	0	1	1	1	0	0	0.9983	nuclear membrane part
44452	32	0	0	0	1	1	1	0	0	0.9939	nucleolar part
44451	145	0	0	0	1	1	1	0	0	0.9932	nucleoplasm part
44450	16	0	0	0	1	1	1	0	0	0.9765	microtubule organizing center part
44448	27	0	0	0	1	1	1	0	0	0.9847	cell cortex part
44447	6	0	0	0	1	1	1	0	0	0.993	axoneme part
44445	136	0	0	0	1	1	1	0	0	1.0013	cytosolic part
44441	47	0	0	0	1	1	1	0	0	0.9894	ciliary part
44440	28	0	0	0	1	1	1	0	0	0.9071	endosomal part
44439	18	0	0	0	1	1	1	0	0	0.9958	peroxisomal part
44438	18	0	0	0	1	1	1	0	0	0.9958	microbody part
44437	68	0	0	0	1	1	1	0	0	0.9931	vacuolar part
44433	56	0	0	0	1	1	1	0	0	1.0012	cytoplasmic vesicle part
44432	178	0	0	0	1	1	1	0	0	0.9112	endoplasmic reticulum part
44431	149	0	0	0	1	1	1	0	0	0.9116	Golgi apparatus part
44429	276	0	0	0	1	1	1	0	0	1.0011	mitochondrial part
44427	240	0	0	0	1	1	1	0	0	0.9919	chromosomal part
44423	2	0	0	0	1	1	1	0	0	0.9932	virion part
44420	27	0	0	0	1	1	1	0	0	0.9847	extracellular matrix component
44391	123	0	0	0	1	1	1	0	0	0.9925	ribosomal subunit
44322	1	0	0	0	1	1	1	0	0	0.9738	endoplasmic reticulum quality control compartment
44306	5	0	0	0	1	1	1	0	0	0.9933	neuron projection terminus
44304	8	0	0	0	1	1	1	0	0	0.9496	main axon
44295	1	0	0	0	1	1	1	0	0	0.9738	axonal growth cone
44292	5	0	0	0	1	1	1	0	0	0.9933	dendrite terminus
44291	1	0	0	0	1	1	1	0	0	0.9738	cell-cell contact zone
44232	1	0	0	0	1	1	1	0	0	0.9738	organelle membrane contact site
43679	1	0	0	0	1	1	1	0	0	0.9738	axon terminus
43626	1	0	0	0	1	1	1	0	0	0.9738	PCNA complex
43625	1	0	0	0	1	1	1	0	0	0.9738	delta DNA polymerase complex
43614	1	0	0	0	1	1	1	0	0	0.9738	multi-eIF complex
43601	8	0	0	0	1	1	1	0	0	0.9496	nuclear replisome
43596	15	0	0	0	1	1	1	0	0	0.9987	nuclear replication fork
43564	2	0	0	0	1	1	1	0	0	0.9932	Ku70:Ku80 complex
43527	3	0	0	0	1	1	1	0	0	0.9983	tRNA methyltransferase complex
43296	8	0	0	0	1	1	1	0	0	0.9496	apical junction complex
43235	74	0	0	0	1	1	1	0	0	0.9994	receptor complex
43224	2	0	0	0	1	1	1	0	0	0.9932	nuclear SCF ubiquitin ligase complex
43204	27	0	0	0	1	1	1	0	0	0.9847	perikaryon
43196	2	0	0	0	1	1	1	0	0	0.9932	varicosity
43194	1	0	0	0	1	1	1	0	0	0.9738	axon initial segment
43189	10	0	0	0	1	1	1	0	0	0.9911	H4/H2A histone acetyltransferase complex
43186	61	0	0	0	1	1	1	0	0	1.001	P granule
43083	3	0	0	0	1	1	1	0	0	0.9983	synaptic cleft
43073	9	0	0	0	1	1	1	0	0	0.9165	germ cell nucleus
42765	4	0	0	0	1	1	1	0	0	0.9923	GPI-anchor transamidase complex
42734	12	0	0	0	1	1	1	0	0	0.9996	presynaptic membrane
42721	2	0	0	0	1	1	1	0	0	0.9932	mitochondrial inner membrane protein insertion complex
42720	2	0	0	0	1	1	1	0	0	0.9932	mitochondrial inner membrane peptidase complex
42719	1	0	0	0	1	1	1	0	0	0.9738	mitochondrial intermembrane space protein transporter complex
42718	2	0	0	0	1	1	1	0	0	0.9932	yolk granule
42645	4	0	0	0	1	1	1	0	0	0.9923	mitochondrial nucleoid
42643	2	0	0	0	1	1	1	0	0	0.9932	actomyosin, actin portion
42642	1	0	0	0	1	1	1	0	0	0.9738	actomyosin, myosin complex part
42641	3	0	0	0	1	1	1	0	0	0.9983	actomyosin
42600	2	0	0	0	1	1	1	0	0	0.9932	chorion
42579	49	0	0	0	1	1	1	0	0	0.948	microbody
42575	4	0	0	0	1	1	1	0	0	0.9923	DNA polymerase complex
42555	6	0	0	0	1	1	1	0	0	0.993	MCM complex
42470	2	0	0	0	1	1	1	0	0	0.9932	melanosome
42383	3	0	0	0	1	1	1	0	0	0.9983	sarcolemma
42175	155	0	0	0	1	1	1	0	0	0.9954	nuclear outer membrane-endoplasmic reticulum membrane network
38201	5	0	0	0	1	1	1	0	0	0.9933	TOR complex
36513	1	0	0	0	1	1	1	0	0	0.9738	Derlin-1 retrotranslocation complex
36464	89	0	0	0	1	1	1	0	0	0.9934	cytoplasmic ribonucleoprotein granule
36452	9	0	0	0	1	1	1	0	0	0.9165	ESCRT complex
36387	1	0	0	0	1	1	1	0	0	0.9738	pre-replicative complex
36266	1	0	0	0	1	1	1	0	0	0.9738	Cdc48p-Npl4p-Vms1p AAA ATPase complex
36195	2	0	0	0	1	1	1	0	0	0.9932	muscle cell projection membrane
36194	3	0	0	0	1	1	1	0	0	0.9983	muscle cell projection
36125	2	0	0	0	1	1	1	0	0	0.9932	fatty acid beta-oxidation multienzyme complex
36064	21	0	0	0	1	1	1	0	0	0.999	ciliary basal body
36062	6	0	0	0	1	1	1	0	0	0.993	presynaptic periactive zone
36038	1	0	0	0	1	1	1	0	0	0.9738	MKS complex
36019	1	0	0	0	1	1	1	0	0	0.9738	endolysosome
35869	18	0	0	0	1	1	1	0	0	0.9958	ciliary transition zone
35861	3	0	0	0	1	1	1	0	0	0.9983	site of double-strand break
35770	90	0	0	0	1	1	1	0	0	0.9925	ribonucleoprotein granule
35632	2	0	0	0	1	1	1	0	0	0.9932	mitochondrial prohibitin complex
35371	4	0	0	0	1	1	1	0	0	0.9923	microtubule plus-end
35267	10	0	0	0	1	1	1	0	0	0.9911	NuA4 histone acetyltransferase complex
35145	4	0	0	0	1	1	1	0	0	0.9923	exon-exon junction complex
35097	3	0	0	0	1	1	1	0	0	0.9983	histone methyltransferase complex
35068	3	0	0	0	1	1	1	0	0	0.9983	micro-ribonucleoprotein complex
35032	4	0	0	0	1	1	1	0	0	0.9923	phosphatidylinositol 3-kinase complex, class III
34993	1	0	0	0	1	1	1	0	0	0.9738	LINC complex
34992	1	0	0	0	1	1	1	0	0	0.9738	microtubule organizing center attachment site
34753	1	0	0	0	1	1	1	0	0	0.9738	nuclear aryl hydrocarbon receptor complex
34751	1	0	0	0	1	1	1	0	0	0.9738	aryl hydrocarbon receptor complex
34719	4	0	0	0	1	1	1	0	0	0.9923	SMN-Sm protein complex
34715	3	0	0	0	1	1	1	0	0	0.9983	pICln-Sm protein complex
34709	1	0	0	0	1	1	1	0	0	0.9738	methylosome
34708	7	0	0	0	1	1	1	0	0	0.8895	methyltransferase complex
34707	32	0	0	0	1	1	1	0	0	0.9939	chloride channel complex
34705	17	0	0	0	1	1	1	0	0	1.0001	potassium channel complex
34704	8	0	0	0	1	1	1	0	0	0.9496	calcium channel complex
34703	26	0	0	0	1	1	1	0	0	0.9944	cation channel complex
34702	118	0	0	0	1	1	1	0	0	0.9926	ion channel complex
34663	2	0	0	0	1	1	1	0	0	0.9932	endoplasmic reticulum chaperone complex
34518	5	0	0	0	1	1	1	0	0	0.9933	RNA cap binding complex
34515	2	0	0	0	1	1	1	0	0	0.9932	proteasome storage granule
34464	7	0	0	0	1	1	1	0	0	0.8895	BBSome
34457	3	0	0	0	1	1	1	0	0	0.9983	Mpp10 complex
34456	2	0	0	0	1	1	1	0	0	0.9932	UTP-C complex
34455	1	0	0	0	1	1	1	0	0	0.9738	t-UTP complex
34399	10	0	0	0	1	1	1	0	0	0.9911	nuclear periphery
34388	4	0	0	0	1	1	1	0	0	0.9923	Pwp2p-containing subcomplex of 90S preribosome
34274	2	0	0	0	1	1	1	0	0	0.9932	Atg12-Atg5-Atg16 complex
34272	3	0	0	0	1	1	1	0	0	0.9983	phosphatidylinositol 3-kinase complex, class III, type II
34271	3	0	0	0	1	1	1	0	0	0.9983	phosphatidylinositol 3-kinase complex, class III, type I
34098	4	0	0	0	1	1	1	0	0	0.9923	VCP-NPL4-UFD1 AAA ATPase complex
34066	1	0	0	0	1	1	1	0	0	0.9738	RIC1-RGP1 guanyl-nucleotide exchange factor complex
34045	5	0	0	0	1	1	1	0	0	0.9933	pre-autophagosomal structure membrane
33588	2	0	0	0	1	1	1	0	0	0.9932	Elongator holoenzyme complex
33573	1	0	0	0	1	1	1	0	0	0.9738	high-affinity iron permease complex
33565	2	0	0	0	1	1	1	0	0	0.9932	ESCRT-0 complex
33557	2	0	0	0	1	1	1	0	0	0.9932	Slx1-Slx4 complex
33553	1	0	0	0	1	1	1	0	0	0.9738	rDNA heterochromatin
33503	3	0	0	0	1	1	1	0	0	0.9983	HULC complex
33290	13	0	0	0	1	1	1	0	0	0.9935	eukaryotic 48S preinitiation complex
33267	9	0	0	0	1	1	1	0	0	0.9165	axon part
33263	1	0	0	0	1	1	1	0	0	0.9738	CORVET complex
33202	1	0	0	0	1	1	1	0	0	0.9738	DNA helicase complex
33186	2	0	0	0	1	1	1	0	0	0.9932	CAF-1 complex
33185	1	0	0	0	1	1	1	0	0	0.9738	dolichol-phosphate-mannose synthase complex
33181	1	0	0	0	1	1	1	0	0	0.9738	plasma membrane proton-transporting V-type ATPase complex
33180	8	0	0	0	1	1	1	0	0	0.9496	proton-transporting V-type ATPase, V1 domain
33179	10	0	0	0	1	1	1	0	0	0.9911	proton-transporting V-type ATPase, V0 domain
33178	17	0	0	0	1	1	1	0	0	1.0001	proton-transporting two-sector ATPase complex, catalytic domain
33177	19	0	0	0	1	1	1	0	0	0.9734	proton-transporting two-sector ATPase complex, proton-transporting domain
33176	20	0	0	0	1	1	1	0	0	0.9894	proton-transporting V-type ATPase complex
33116	1	0	0	0	1	1	1	0	0	0.9738	endoplasmic reticulum-Golgi intermediate compartment membrane
33063	1	0	0	0	1	1	1	0	0	0.9738	Rad51B-Rad51C-Rad51D-XRCC2 complex
33061	1	0	0	0	1	1	1	0	0	0.9738	DNA recombinase mediator complex
33017	2	0	0	0	1	1	1	0	0	0.9932	sarcoplasmic reticulum membrane
32993	104	0	0	0	1	1	1	0	0	0.9951	protein-DNA complex
32983	1	0	0	0	1	1	1	0	0	0.9738	kainate selective glutamate receptor complex
32982	11	0	0	0	1	1	1	0	0	0.99	myosin filament
32806	5	0	0	0	1	1	1	0	0	0.9933	carboxy-terminal domain protein kinase complex
32797	2	0	0	0	1	1	1	0	0	0.9932	SMN complex
32783	1	0	0	0	1	1	1	0	0	0.9738	ELL-EAF complex
32777	1	0	0	0	1	1	1	0	0	0.9738	Piccolo NuA4 histone acetyltransferase complex
32593	1	0	0	0	1	1	1	0	0	0.9738	insulin-responsive compartment
32592	12	0	0	0	1	1	1	0	0	0.9996	integral component of mitochondrial membrane
32590	6	0	0	0	1	1	1	0	0	0.993	dendrite membrane
32589	15	0	0	0	1	1	1	0	0	0.9987	neuron projection membrane
32584	1	0	0	0	1	1	1	0	0	0.9738	growth cone membrane
32580	11	0	0	0	1	1	1	0	0	0.99	Golgi cisterna membrane
32545	2	0	0	0	1	1	1	0	0	0.9932	CURI complex
32541	2	0	0	0	1	1	1	0	0	0.9932	cortical endoplasmic reticulum
32433	1	0	0	0	1	1	1	0	0	0.9738	filopodium tip
32432	3	0	0	0	1	1	1	0	0	0.9983	actin filament bundle
32389	2	0	0	0	1	1	1	0	0	0.9932	MutLalpha complex
32302	2	0	0	0	1	1	1	0	0	0.9932	MutSbeta complex
32301	2	0	0	0	1	1	1	0	0	0.9932	MutSalpha complex
32300	5	0	0	0	1	1	1	0	0	0.9933	mismatch repair complex
32299	2	0	0	0	1	1	1	0	0	0.9932	ribonuclease H2 complex
32281	2	0	0	0	1	1	1	0	0	0.9932	AMPA glutamate receptor complex
32155	17	0	0	0	1	1	1	0	0	1.0001	cell division site part
32154	17	0	0	0	1	1	1	0	0	1.0001	cleavage furrow
32153	17	0	0	0	1	1	1	0	0	1.0001	cell division site
32133	2	0	0	0	1	1	1	0	0	0.9932	chromosome passenger complex
32116	2	0	0	0	1	1	1	0	0	0.9932	SMC loading complex
32044	1	0	0	0	1	1	1	0	0	0.9738	DSIF complex
32040	33	0	0	0	1	1	1	0	0	1.0014	small-subunit processome
32039	3	0	0	0	1	1	1	0	0	0.9983	integrator complex
32009	4	0	0	0	1	1	1	0	0	0.9923	early phagosome
31988	117	0	0	0	1	1	1	0	0	0.9447	membrane-bounded vesicle
31985	28	0	0	0	1	1	1	0	0	0.9071	Golgi cisterna
31984	52	0	0	0	1	1	1	0	0	0.9798	organelle subcompartment
31983	2	0	0	0	1	1	1	0	0	0.9932	vesicle lumen
31982	144	0	0	0	1	1	1	0	0	0.9056	vesicle
31975	252	0	0	0	1	1	1	0	0	0.993	envelope
31970	13	0	0	0	1	1	1	0	0	0.9935	organelle envelope lumen
31968	26	0	0	0	1	1	1	0	0	0.9944	organelle outer membrane
31967	251	0	0	0	1	1	1	0	0	0.9081	organelle envelope
31966	164	0	0	0	1	1	1	0	0	0.8992	mitochondrial membrane
31965	26	0	0	0	1	1	1	0	0	0.9944	nuclear membrane
31941	4	0	0	0	1	1	1	0	0	0.9923	filamentous actin
31932	4	0	0	0	1	1	1	0	0	0.9923	TORC2 complex
31931	3	0	0	0	1	1	1	0	0	0.9983	TORC1 complex
31907	4	0	0	0	1	1	1	0	0	0.9923	microbody lumen
31903	14	0	0	0	1	1	1	0	0	1.0017	microbody membrane
31902	6	0	0	0	1	1	1	0	0	0.993	late endosome membrane
31901	1	0	0	0	1	1	1	0	0	0.9738	early endosome membrane
31616	4	0	0	0	1	1	1	0	0	0.9923	spindle pole centrosome
31597	10	0	0	0	1	1	1	0	0	0.9911	cytosolic proteasome complex
31595	9	0	0	0	1	1	1	0	0	0.9165	nuclear proteasome complex
31594	12	0	0	0	1	1	1	0	0	0.9996	neuromuscular junction
31588	1	0	0	0	1	1	1	0	0	0.9738	nucleotide-activated protein kinase complex
31528	3	0	0	0	1	1	1	0	0	0.9983	microvillus membrane
31526	2	0	0	0	1	1	1	0	0	0.9932	brush border membrane
31519	3	0	0	0	1	1	1	0	0	0.9983	PcG protein complex
31515	2	0	0	0	1	1	1	0	0	0.9932	tRNA (m1A) methyltransferase complex
31514	7	0	0	0	1	1	1	0	0	0.8895	motile cilium
31513	82	0	0	0	1	1	1	0	0	1.0006	nonmotile primary cilium
31510	2	0	0	0	1	1	1	0	0	0.9932	SUMO activating enzyme complex
31502	1	0	0	0	1	1	1	0	0	0.9738	dolichyl-phosphate-mannose-protein mannosyltransferase complex
31501	3	0	0	0	1	1	1	0	0	0.9983	mannosyltransferase complex
31476	1	0	0	0	1	1	1	0	0	0.9738	myosin VI complex
31467	2	0	0	0	1	1	1	0	0	0.9932	Cul7-RING ubiquitin ligase complex
31466	2	0	0	0	1	1	1	0	0	0.9932	Cul5-RING ubiquitin ligase complex
31463	12	0	0	0	1	1	1	0	0	0.9996	Cul3-RING ubiquitin ligase complex
31462	10	0	0	0	1	1	1	0	0	0.9911	Cul2-RING ubiquitin ligase complex
31461	36	0	0	0	1	1	1	0	0	0.8994	cullin-RING ubiquitin ligase complex
31436	3	0	0	0	1	1	1	0	0	0.9983	BRCA1-BARD1 complex
31429	2	0	0	0	1	1	1	0	0	0.9932	box H/ACA snoRNP complex
31428	4	0	0	0	1	1	1	0	0	0.9923	box C/D snoRNP complex
31417	2	0	0	0	1	1	1	0	0	0.9932	NatC complex
31416	2	0	0	0	1	1	1	0	0	0.9932	NatB complex
31415	2	0	0	0	1	1	1	0	0	0.9932	NatA complex
31414	6	0	0	0	1	1	1	0	0	0.993	N-terminal protein acetyltransferase complex
31410	139	0	0	0	1	1	1	0	0	0.9924	cytoplasmic vesicle
31390	2	0	0	0	1	1	1	0	0	0.9932	Ctf18 RFC-like complex
31379	2	0	0	0	1	1	1	0	0	0.9932	RNA-directed RNA polymerase complex
31371	4	0	0	0	1	1	1	0	0	0.9923	ubiquitin conjugating enzyme complex
31362	1	0	0	0	1	1	1	0	0	0.9738	anchored component of external side of plasma membrane
31332	11	0	0	0	1	1	1	0	0	0.99	RNAi effector complex
31314	4	0	0	0	1	1	1	0	0	0.9923	extrinsic component of mitochondrial inner membrane
31312	5	0	0	0	1	1	1	0	0	0.9933	extrinsic component of organelle membrane
31310	1	0	0	0	1	1	1	0	0	0.9738	intrinsic component of vacuolar membrane
31307	6	0	0	0	1	1	1	0	0	0.993	integral component of mitochondrial outer membrane
31306	6	0	0	0	1	1	1	0	0	0.993	intrinsic component of mitochondrial outer membrane
31305	6	0	0	0	1	1	1	0	0	0.993	integral component of mitochondrial inner membrane
31304	6	0	0	0	1	1	1	0	0	0.993	intrinsic component of mitochondrial inner membrane
31303	1	0	0	0	1	1	1	0	0	0.9738	integral component of endosome membrane
31302	1	0	0	0	1	1	1	0	0	0.9738	intrinsic component of endosome membrane
31298	7	0	0	0	1	1	1	0	0	0.8895	replication fork protection complex
31262	1	0	0	0	1	1	1	0	0	0.9738	Ndc80 complex
31261	4	0	0	0	1	1	1	0	0	0.9923	DNA replication preinitiation complex
31256	15	0	0	0	1	1	1	0	0	0.9987	leading edge membrane
31252	24	0	0	0	1	1	1	0	0	0.9927	cell leading edge
31251	2	0	0	0	1	1	1	0	0	0.9932	PAN complex
31248	22	0	0	0	1	1	1	0	0	0.9935	protein acetyltransferase complex
31235	3	0	0	0	1	1	1	0	0	0.9983	intrinsic component of the cytoplasmic side of the plasma membrane
31234	69	0	0	0	1	1	1	0	0	0.9979	extrinsic component of cytoplasmic side of plasma membrane
31233	1	0	0	0	1	1	1	0	0	0.9738	intrinsic component of external side of plasma membrane
31231	6	0	0	0	1	1	1	0	0	0.993	intrinsic component of peroxisomal membrane
31230	1	0	0	0	1	1	1	0	0	0.9738	intrinsic component of cell outer membrane
31229	3	0	0	0	1	1	1	0	0	0.9983	intrinsic component of nuclear inner membrane
31228	14	0	0	0	1	1	1	0	0	1.0017	intrinsic component of Golgi membrane
31227	28	0	0	0	1	1	1	0	0	0.9071	intrinsic component of endoplasmic reticulum membrane
31225	3	0	0	0	1	1	1	0	0	0.9983	anchored component of membrane
31201	17	0	0	0	1	1	1	0	0	1.0001	SNARE complex
31166	1	0	0	0	1	1	1	0	0	0.9738	integral component of vacuolar membrane
31083	7	0	0	0	1	1	1	0	0	0.8895	BLOC-1 complex
31082	7	0	0	0	1	1	1	0	0	0.8895	BLOC complex
31080	4	0	0	0	1	1	1	0	0	0.9923	nuclear pore outer ring
31045	4	0	0	0	1	1	1	0	0	0.9923	dense core granule
31011	1	0	0	0	1	1	1	0	0	0.9738	Ino80 complex
31010	2	0	0	0	1	1	1	0	0	0.9932	ISWI-type complex
30993	3	0	0	0	1	1	1	0	0	0.9983	axonemal heterotrimeric kinesin-II complex
30992	12	0	0	0	1	1	1	0	0	0.9996	intraciliary transport particle B
30991	5	0	0	0	1	1	1	0	0	0.9933	intraciliary transport particle A
30990	16	0	0	0	1	1	1	0	0	0.9765	intraciliary transport particle
30964	7	0	0	0	1	1	1	0	0	0.8895	NADH dehydrogenase complex
30956	2	0	0	0	1	1	1	0	0	0.9932	glutamyl-tRNA(Gln) amidotransferase complex
30915	6	0	0	0	1	1	1	0	0	0.993	Smc5-Smc6 complex
30904	3	0	0	0	1	1	1	0	0	0.9983	retromer complex
30897	6	0	0	0	1	1	1	0	0	0.993	HOPS complex
30896	3	0	0	0	1	1	1	0	0	0.9983	checkpoint clamp complex
30894	11	0	0	0	1	1	1	0	0	0.99	replisome
30892	1	0	0	0	1	1	1	0	0	0.9738	mitotic cohesin complex
30891	2	0	0	0	1	1	1	0	0	0.9932	VCB complex
30880	73	0	0	0	1	1	1	0	0	0.9927	RNA polymerase complex
30877	1	0	0	0	1	1	1	0	0	0.9738	beta-catenin destruction complex
30870	1	0	0	0	1	1	1	0	0	0.9738	Mre11 complex
30867	5	0	0	0	1	1	1	0	0	0.9933	rough endoplasmic reticulum membrane
30864	11	0	0	0	1	1	1	0	0	0.99	cortical actin cytoskeleton
30863	11	0	0	0	1	1	1	0	0	0.99	cortical cytoskeleton
30849	5	0	0	0	1	1	1	0	0	0.9933	autosome
30692	2	0	0	0	1	1	1	0	0	0.9932	Noc4p-Nop14p complex
30689	2	0	0	0	1	1	1	0	0	0.9932	Noc complex
30688	4	0	0	0	1	1	1	0	0	0.9923	preribosome, small subunit precursor
30687	9	0	0	0	1	1	1	0	0	0.9165	preribosome, large subunit precursor
30686	23	0	0	0	1	1	1	0	0	0.9938	90S preribosome
30684	49	0	0	0	1	1	1	0	0	0.948	preribosome
30681	1	0	0	0	1	1	1	0	0	0.9738	multimeric ribonuclease P complex
30677	2	0	0	0	1	1	1	0	0	0.9932	ribonuclease P complex
30673	5	0	0	0	1	1	1	0	0	0.9933	axolemma
30672	12	0	0	0	1	1	1	0	0	0.9996	synaptic vesicle membrane
30670	4	0	0	0	1	1	1	0	0	0.9923	phagocytic vesicle membrane
30669	1	0	0	0	1	1	1	0	0	0.9738	clathrin-coated endocytic vesicle membrane
30666	5	0	0	0	1	1	1	0	0	0.9933	endocytic vesicle membrane
30665	7	0	0	0	1	1	1	0	0	0.8895	clathrin-coated vesicle membrane
30663	9	0	0	0	1	1	1	0	0	0.9165	COPI-coated vesicle membrane
30662	22	0	0	0	1	1	1	0	0	0.9935	coated vesicle membrane
30660	17	0	0	0	1	1	1	0	0	1.0001	Golgi-associated vesicle membrane
30659	44	0	0	0	1	1	1	0	0	0.9128	cytoplasmic vesicle membrane
30658	27	0	0	0	1	1	1	0	0	0.9847	transport vesicle membrane
30496	10	0	0	0	1	1	1	0	0	0.9911	midbody
30479	3	0	0	0	1	1	1	0	0	0.9983	actin cortical patch
30427	5	0	0	0	1	1	1	0	0	0.9933	site of polarized growth
30426	4	0	0	0	1	1	1	0	0	0.9923	growth cone
30425	63	0	0	0	1	1	1	0	0	0.9477	dendrite
30313	1	0	0	0	1	1	1	0	0	0.9738	cell envelope
30312	4	0	0	0	1	1	1	0	0	0.9923	external encapsulating structure
30286	8	0	0	0	1	1	1	0	0	0.9496	dynein complex
30285	4	0	0	0	1	1	1	0	0	0.9923	integral component of synaptic vesicle membrane
30176	26	0	0	0	1	1	1	0	0	0.9944	integral component of endoplasmic reticulum membrane
30175	3	0	0	0	1	1	1	0	0	0.9983	filopodium
30173	14	0	0	0	1	1	1	0	0	1.0017	integral component of Golgi membrane
30141	14	0	0	0	1	1	1	0	0	1.0017	secretory granule
30140	10	0	0	0	1	1	1	0	0	0.9911	trans-Golgi network transport vesicle
30139	27	0	0	0	1	1	1	0	0	0.9847	endocytic vesicle
30137	9	0	0	0	1	1	1	0	0	0.9165	COPI-coated vesicle
30136	14	0	0	0	1	1	1	0	0	1.0017	clathrin-coated vesicle
30135	29	0	0	0	1	1	1	0	0	0.8444	coated vesicle
30134	7	0	0	0	1	1	1	0	0	0.8895	ER to Golgi transport vesicle
30133	54	0	0	0	1	1	1	0	0	1	transport vesicle
30132	3	0	0	0	1	1	1	0	0	0.9983	clathrin coat of coated pit
30131	10	0	0	0	1	1	1	0	0	0.9911	clathrin adaptor complex
30130	7	0	0	0	1	1	1	0	0	0.8895	clathrin coat of trans-Golgi network vesicle
30128	1	0	0	0	1	1	1	0	0	0.9738	clathrin coat of endocytic vesicle
30127	4	0	0	0	1	1	1	0	0	0.9923	COPII vesicle coat
30126	8	0	0	0	1	1	1	0	0	0.9496	COPI vesicle coat
30125	7	0	0	0	1	1	1	0	0	0.8895	clathrin vesicle coat
30123	1	0	0	0	1	1	1	0	0	0.9738	AP-3 adaptor complex
30122	1	0	0	0	1	1	1	0	0	0.9738	AP-2 adaptor complex
30121	5	0	0	0	1	1	1	0	0	0.9933	AP-1 adaptor complex
30120	19	0	0	0	1	1	1	0	0	0.9734	vesicle coat
30119	11	0	0	0	1	1	1	0	0	0.99	AP-type membrane coat adaptor complex
30118	12	0	0	0	1	1	1	0	0	0.9996	clathrin coat
30117	27	0	0	0	1	1	1	0	0	0.9847	membrane coat
30057	1	0	0	0	1	1	1	0	0	0.9738	desmosome
30056	12	0	0	0	1	1	1	0	0	0.9996	hemidesmosome
30055	16	0	0	0	1	1	1	0	0	0.9765	cell-substrate junction
30027	1	0	0	0	1	1	1	0	0	0.9738	lamellipodium
30015	6	0	0	0	1	1	1	0	0	0.993	CCR4-NOT core complex
30014	7	0	0	0	1	1	1	0	0	0.8895	CCR4-NOT complex
30008	4	0	0	0	1	1	1	0	0	0.9923	TRAPP complex
22627	28	0	0	0	1	1	1	0	0	0.9071	cytosolic small ribosomal subunit
22626	77	0	0	0	1	1	1	0	0	0.9843	cytosolic ribosome
22625	45	0	0	0	1	1	1	0	0	0.995	cytosolic large ribosomal subunit
22624	22	0	0	0	1	1	1	0	0	0.9935	proteasome accessory complex
19898	103	0	0	0	1	1	1	0	0	0.9017	extrinsic component of membrane
19897	73	0	0	0	1	1	1	0	0	0.9927	extrinsic component of plasma membrane
19867	27	0	0	0	1	1	1	0	0	0.9847	outer membrane
19866	128	0	0	0	1	1	1	0	0	0.9919	organelle inner membrane
19773	7	0	0	0	1	1	1	0	0	0.8895	proteasome core complex, alpha-subunit complex
19028	2	0	0	0	1	1	1	0	0	0.9932	viral capsid
19013	2	0	0	0	1	1	1	0	0	0.9932	viral nucleocapsid
19012	2	0	0	0	1	1	1	0	0	0.9932	virion
19008	4	0	0	0	1	1	1	0	0	0.9923	molybdopterin synthase complex
19005	6	0	0	0	1	1	1	0	0	0.993	SCF ubiquitin ligase complex
18444	1	0	0	0	1	1	1	0	0	0.9738	translation release factor complex
17146	1	0	0	0	1	1	1	0	0	0.9738	NMDA selective glutamate receptor complex
17119	6	0	0	0	1	1	1	0	0	0.993	Golgi transport complex
17109	2	0	0	0	1	1	1	0	0	0.9932	glutamate-cysteine ligase complex
17087	2	0	0	0	1	1	1	0	0	0.9932	mitochondrial processing peptidase complex
17053	11	0	0	0	1	1	1	0	0	0.99	transcriptional repressor complex
16938	3	0	0	0	1	1	1	0	0	0.9983	kinesin I complex
16607	15	0	0	0	1	1	1	0	0	0.9987	nuclear speck
16604	19	0	0	0	1	1	1	0	0	0.9734	nuclear body
16602	1	0	0	0	1	1	1	0	0	0.9738	CCAAT-binding factor complex
16593	6	0	0	0	1	1	1	0	0	0.993	Cdc73/Paf1 complex
16592	19	0	0	0	1	1	1	0	0	0.9734	mediator complex
16591	54	0	0	0	1	1	1	0	0	1	DNA-directed RNA polymerase II, holoenzyme
16590	1	0	0	0	1	1	1	0	0	0.9738	ACF complex
16589	1	0	0	0	1	1	1	0	0	0.9738	NURF complex
16581	4	0	0	0	1	1	1	0	0	0.9923	NuRD complex
16580	1	0	0	0	1	1	1	0	0	0.9738	Sin3 complex
16533	1	0	0	0	1	1	1	0	0	0.9738	cyclin-dependent protein kinase 5 holoenzyme complex
16529	20	0	0	0	1	1	1	0	0	0.9894	sarcoplasmic reticulum
16528	21	0	0	0	1	1	1	0	0	0.999	sarcoplasm
16507	2	0	0	0	1	1	1	0	0	0.9932	mitochondrial fatty acid beta-oxidation multienzyme complex
16471	12	0	0	0	1	1	1	0	0	0.9996	vacuolar proton-transporting V-type ATPase complex
16469	40	0	0	0	1	1	1	0	0	0.8896	proton-transporting two-sector ATPase complex
16461	1	0	0	0	1	1	1	0	0	0.9738	unconventional myosin complex
16442	8	0	0	0	1	1	1	0	0	0.9496	RISC complex
16342	3	0	0	0	1	1	1	0	0	0.9983	catenin complex
16328	7	0	0	0	1	1	1	0	0	0.8895	lateral plasma membrane
16327	2	0	0	0	1	1	1	0	0	0.9932	apicolateral plasma membrane
16324	57	0	0	0	1	1	1	0	0	0.9936	apical plasma membrane
16323	30	0	0	0	1	1	1	0	0	0.9937	basolateral plasma membrane
16282	12	0	0	0	1	1	1	0	0	0.9996	eukaryotic 43S preinitiation complex
16281	1	0	0	0	1	1	1	0	0	0.9738	eukaryotic translation initiation factor 4F complex
16272	6	0	0	0	1	1	1	0	0	0.993	prefoldin complex
16235	5	0	0	0	1	1	1	0	0	0.9933	aggresome
16234	5	0	0	0	1	1	1	0	0	0.9933	inclusion body
16222	2	0	0	0	1	1	1	0	0	0.9932	procollagen-proline 4-dioxygenase complex
16035	1	0	0	0	1	1	1	0	0	0.9738	zeta DNA polymerase complex
16023	117	0	0	0	1	1	1	0	0	0.9447	cytoplasmic, membrane-bounded vesicle
16014	2	0	0	0	1	1	1	0	0	0.9932	dystrobrevin complex
16012	3	0	0	0	1	1	1	0	0	0.9983	sarcoglycan complex
16011	3	0	0	0	1	1	1	0	0	0.9983	dystroglycan complex
16010	10	0	0	0	1	1	1	0	0	0.9911	dystrophin-associated glycoprotein complex
15935	55	0	0	0	1	1	1	0	0	0.9896	small ribosomal subunit
15934	68	0	0	0	1	1	1	0	0	0.9931	large ribosomal subunit
15030	3	0	0	0	1	1	1	0	0	0.9983	Cajal body
14069	8	0	0	0	1	1	1	0	0	0.9496	postsynaptic density
12510	7	0	0	0	1	1	1	0	0	0.8895	trans-Golgi network transport vesicle membrane
12507	7	0	0	0	1	1	1	0	0	0.8895	ER to Golgi transport vesicle membrane
12506	44	0	0	0	1	1	1	0	0	0.9128	vesicle membrane
10494	9	0	0	0	1	1	1	0	0	0.9165	cytoplasmic stress granule
10008	26	0	0	0	1	1	1	0	0	0.9944	endosome membrane
9986	41	0	0	0	1	1	1	0	0	0.9161	cell surface
9925	7	0	0	0	1	1	1	0	0	0.8895	basal plasma membrane
9898	79	0	0	0	1	1	1	0	0	0.9062	cytoplasmic side of plasma membrane
9897	2	0	0	0	1	1	1	0	0	0.9932	external side of plasma membrane
9331	4	0	0	0	1	1	1	0	0	0.9923	glycerol-3-phosphate dehydrogenase complex
9328	3	0	0	0	1	1	1	0	0	0.9983	phenylalanine-tRNA ligase complex
9295	7	0	0	0	1	1	1	0	0	0.8895	nucleoid
9279	1	0	0	0	1	1	1	0	0	0.9738	cell outer membrane
8623	1	0	0	0	1	1	1	0	0	0.9738	CHRAC
8622	1	0	0	0	1	1	1	0	0	0.9738	epsilon DNA polymerase complex
8541	5	0	0	0	1	1	1	0	0	0.9933	proteasome regulatory particle, lid subcomplex
8540	13	0	0	0	1	1	1	0	0	0.9935	proteasome regulatory particle, base subcomplex
8537	1	0	0	0	1	1	1	0	0	0.9738	proteasome activator complex
8352	4	0	0	0	1	1	1	0	0	0.9923	katanin complex
8328	9	0	0	0	1	1	1	0	0	0.9165	ionotropic glutamate receptor complex
8305	6	0	0	0	1	1	1	0	0	0.993	integrin complex
8290	2	0	0	0	1	1	1	0	0	0.9932	F-actin capping protein complex
8287	13	0	0	0	1	1	1	0	0	0.9935	protein serine/threonine phosphatase complex
8280	2	0	0	0	1	1	1	0	0	0.9932	cohesin core heterodimer
8278	6	0	0	0	1	1	1	0	0	0.993	cohesin complex
8250	4	0	0	0	1	1	1	0	0	0.9923	oligosaccharyltransferase complex
8180	8	0	0	0	1	1	1	0	0	0.9496	COP9 signalosome
8091	1	0	0	0	1	1	1	0	0	0.9738	spectrin
8076	17	0	0	0	1	1	1	0	0	1.0001	voltage-gated potassium channel complex
8074	32	0	0	0	1	1	1	0	0	0.9939	guanylate cyclase complex, soluble
8023	16	0	0	0	1	1	1	0	0	0.9765	transcription elongation factor complex
8021	32	0	0	0	1	1	1	0	0	0.9939	synaptic vesicle
5971	5	0	0	0	1	1	1	0	0	0.9933	ribonucleoside-diphosphate reductase complex
5968	2	0	0	0	1	1	1	0	0	0.9932	Rab-protein geranylgeranyltransferase complex
5965	2	0	0	0	1	1	1	0	0	0.9932	protein farnesyltransferase complex
5964	3	0	0	0	1	1	1	0	0	0.9983	phosphorylase kinase complex
5960	3	0	0	0	1	1	1	0	0	0.9983	glycine cleavage complex
5956	1	0	0	0	1	1	1	0	0	0.9738	protein kinase CK2 complex
5953	2	0	0	0	1	1	1	0	0	0.9932	CAAX-protein geranylgeranyltransferase complex
5952	2	0	0	0	1	1	1	0	0	0.9932	cAMP-dependent protein kinase complex
5942	7	0	0	0	1	1	1	0	0	0.8895	phosphatidylinositol 3-kinase complex
5938	102	0	0	0	1	1	1	0	0	0.9945	cell cortex
5930	17	0	0	0	1	1	1	0	0	1.0001	axoneme
5929	113	0	0	0	1	1	1	0	0	0.9732	cilium
5925	3	0	0	0	1	1	1	0	0	0.9983	focal adhesion
5924	3	0	0	0	1	1	1	0	0	0.9983	cell-substrate adherens junction
5923	3	0	0	0	1	1	1	0	0	0.9983	bicellular tight junction
5921	25	0	0	0	1	1	1	0	0	0.9941	gap junction
5913	13	0	0	0	1	1	1	0	0	0.9935	cell-cell adherens junction
5912	31	0	0	0	1	1	1	0	0	0.943	adherens junction
5911	54	0	0	0	1	1	1	0	0	1	cell-cell junction
5905	7	0	0	0	1	1	1	0	0	0.8895	coated pit
5903	3	0	0	0	1	1	1	0	0	0.9983	brush border
5902	4	0	0	0	1	1	1	0	0	0.9923	microvillus
5901	2	0	0	0	1	1	1	0	0	0.9932	caveola
5892	51	0	0	0	1	1	1	0	0	0.9109	acetylcholine-gated channel complex
5891	7	0	0	0	1	1	1	0	0	0.8895	voltage-gated calcium channel complex
5890	3	0	0	0	1	1	1	0	0	0.9983	sodium:potassium-exchanging ATPase complex
5885	8	0	0	0	1	1	1	0	0	0.9496	Arp2/3 protein complex
5884	13	0	0	0	1	1	1	0	0	0.9935	actin filament
5882	19	0	0	0	1	1	1	0	0	0.9734	intermediate filament
5881	9	0	0	0	1	1	1	0	0	0.9165	cytoplasmic microtubule
5879	3	0	0	0	1	1	1	0	0	0.9983	axonemal microtubule
5876	20	0	0	0	1	1	1	0	0	0.9894	spindle microtubule
5875	53	0	0	0	1	1	1	0	0	0.9845	microtubule associated complex
5874	85	0	0	0	1	1	1	0	0	0.9904	microtubule
5871	25	0	0	0	1	1	1	0	0	0.9941	kinesin complex
5869	10	0	0	0	1	1	1	0	0	0.9911	dynactin complex
5868	3	0	0	0	1	1	1	0	0	0.9983	cytoplasmic dynein complex
5863	8	0	0	0	1	1	1	0	0	0.9496	striated muscle myosin thick filament
5862	1	0	0	0	1	1	1	0	0	0.9738	muscle thin filament tropomyosin
5861	8	0	0	0	1	1	1	0	0	0.9496	troponin complex
5853	2	0	0	0	1	1	1	0	0	0.9932	eukaryotic translation elongation factor 1 complex
5852	16	0	0	0	1	1	1	0	0	0.9765	eukaryotic translation initiation factor 3 complex
5851	4	0	0	0	1	1	1	0	0	0.9923	eukaryotic translation initiation factor 2B complex
5850	1	0	0	0	1	1	1	0	0	0.9738	eukaryotic translation initiation factor 2 complex
5849	7	0	0	0	1	1	1	0	0	0.8895	mRNA cleavage factor complex
5847	5	0	0	0	1	1	1	0	0	0.9933	mRNA cleavage and polyadenylation specificity factor complex
5846	2	0	0	0	1	1	1	0	0	0.9932	nuclear cap binding complex
5845	2	0	0	0	1	1	1	0	0	0.9932	mRNA cap binding complex
5844	8	0	0	0	1	1	1	0	0	0.9496	polysome
5840	175	0	0	0	1	1	1	0	0	0.9768	ribosome
5839	14	0	0	0	1	1	1	0	0	1.0017	proteasome core complex
5838	20	0	0	0	1	1	1	0	0	0.9894	proteasome regulatory particle
5834	25	0	0	0	1	1	1	0	0	0.9941	heterotrimeric G-protein complex
5832	3	0	0	0	1	1	1	0	0	0.9983	chaperonin-containing T-complex
5829	315	0	0	0	1	1	1	0	0	0.9981	cytosol
5828	4	0	0	0	1	1	1	0	0	0.9923	kinetochore microtubule
5826	1	0	0	0	1	1	1	0	0	0.9738	actomyosin contractile ring
5819	66	0	0	0	1	1	1	0	0	1.0015	spindle
5818	14	0	0	0	1	1	1	0	0	1.0017	aster
5814	8	0	0	0	1	1	1	0	0	0.9496	centriole
5811	13	0	0	0	1	1	1	0	0	0.9935	lipid particle
5802	18	0	0	0	1	1	1	0	0	0.9958	trans-Golgi network
5801	5	0	0	0	1	1	1	0	0	0.9933	cis-Golgi network
5798	22	0	0	0	1	1	1	0	0	0.9935	Golgi-associated vesicle
5797	10	0	0	0	1	1	1	0	0	0.9911	Golgi medial cisterna
5796	2	0	0	0	1	1	1	0	0	0.9932	Golgi lumen
5795	33	0	0	0	1	1	1	0	0	1.0014	Golgi stack
5794	209	0	0	0	1	1	1	0	0	0.9925	Golgi apparatus
5793	3	0	0	0	1	1	1	0	0	0.9983	endoplasmic reticulum-Golgi intermediate compartment
5791	7	0	0	0	1	1	1	0	0	0.8895	rough endoplasmic reticulum
5789	152	0	0	0	1	1	1	0	0	0.9809	endoplasmic reticulum membrane
5788	16	0	0	0	1	1	1	0	0	0.9765	endoplasmic reticulum lumen
5787	3	0	0	0	1	1	1	0	0	0.9983	signal peptidase complex
5786	6	0	0	0	1	1	1	0	0	0.993	signal recognition particle, endoplasmic reticulum targeting
5785	2	0	0	0	1	1	1	0	0	0.9932	signal recognition particle receptor complex
5784	2	0	0	0	1	1	1	0	0	0.9932	Sec61 translocon complex
5783	306	0	0	0	1	1	1	0	0	0.9129	endoplasmic reticulum
5782	4	0	0	0	1	1	1	0	0	0.9923	peroxisomal matrix
5780	1	0	0	0	1	1	1	0	0	0.9738	extrinsic component of intraperoxisomal membrane
5779	6	0	0	0	1	1	1	0	0	0.993	integral component of peroxisomal membrane
5778	14	0	0	0	1	1	1	0	0	1.0017	peroxisomal membrane
5777	49	0	0	0	1	1	1	0	0	0.948	peroxisome
5776	12	0	0	0	1	1	1	0	0	0.9996	autophagosome
5774	66	0	0	0	1	1	1	0	0	1.0015	vacuolar membrane
5771	2	0	0	0	1	1	1	0	0	0.9932	multivesicular body
5770	18	0	0	0	1	1	1	0	0	0.9958	late endosome
5769	25	0	0	0	1	1	1	0	0	0.9941	early endosome
5765	20	0	0	0	1	1	1	0	0	0.9894	lysosomal membrane
5764	81	0	0	0	1	1	1	0	0	0.9779	lysosome
5763	24	0	0	0	1	1	1	0	0	0.9927	mitochondrial small ribosomal subunit
5762	21	0	0	0	1	1	1	0	0	0.999	mitochondrial large ribosomal subunit
5761	48	0	0	0	1	1	1	0	0	0.9899	mitochondrial ribosome
5760	1	0	0	0	1	1	1	0	0	0.9738	gamma DNA polymerase complex
5759	108	0	0	0	1	1	1	0	0	0.9907	mitochondrial matrix
5758	13	0	0	0	1	1	1	0	0	0.9935	mitochondrial intermembrane space
5753	13	0	0	0	1	1	1	0	0	0.9935	mitochondrial proton-transporting ATP synthase complex
5751	3	0	0	0	1	1	1	0	0	0.9983	mitochondrial respiratory chain complex IV
5750	2	0	0	0	1	1	1	0	0	0.9932	mitochondrial respiratory chain complex III
5749	3	0	0	0	1	1	1	0	0	0.9983	mitochondrial respiratory chain complex II, succinate dehydrogenase complex (ubiquinone)
5747	7	0	0	0	1	1	1	0	0	0.8895	mitochondrial respiratory chain complex I
5746	15	0	0	0	1	1	1	0	0	0.9987	mitochondrial respiratory chain
5744	6	0	0	0	1	1	1	0	0	0.993	mitochondrial inner membrane presequence translocase complex
5743	121	0	0	0	1	1	1	0	0	0.9894	mitochondrial inner membrane
5742	5	0	0	0	1	1	1	0	0	0.9933	mitochondrial outer membrane translocase complex
5741	24	0	0	0	1	1	1	0	0	0.9927	mitochondrial outer membrane
5740	175	0	0	0	1	1	1	0	0	0.9768	mitochondrial envelope
5739	483	0	0	0	1	1	1	0	0	0.9326	mitochondrion
5736	11	0	0	0	1	1	1	0	0	0.99	DNA-directed RNA polymerase I complex
5732	14	0	0	0	1	1	1	0	0	1.0017	small nucleolar ribonucleoprotein complex
5720	3	0	0	0	1	1	1	0	0	0.9983	nuclear heterochromatin
5712	1	0	0	0	1	1	1	0	0	0.9738	chiasma
5697	3	0	0	0	1	1	1	0	0	0.9983	telomerase holoenzyme complex
5694	311	0	0	0	1	1	1	0	0	0.9068	chromosome
5690	1	0	0	0	1	1	1	0	0	0.9738	U4atac snRNP
5689	8	0	0	0	1	1	1	0	0	0.9496	U12-type spliceosomal complex
5688	8	0	0	0	1	1	1	0	0	0.9496	U6 snRNP
5687	6	0	0	0	1	1	1	0	0	0.993	U4 snRNP
5685	17	0	0	0	1	1	1	0	0	1.0001	U1 snRNP
5684	25	0	0	0	1	1	1	0	0	0.9941	U2-type spliceosomal complex
5683	1	0	0	0	1	1	1	0	0	0.9738	U7 snRNP
5682	13	0	0	0	1	1	1	0	0	0.9935	U5 snRNP
5680	6	0	0	0	1	1	1	0	0	0.993	anaphase-promoting complex
5677	1	0	0	0	1	1	1	0	0	0.9738	chromatin silencing complex
5675	5	0	0	0	1	1	1	0	0	0.9933	holo TFIIH complex
5674	1	0	0	0	1	1	1	0	0	0.9738	transcription factor TFIIF complex
5673	2	0	0	0	1	1	1	0	0	0.9932	transcription factor TFIIE complex
5672	3	0	0	0	1	1	1	0	0	0.9983	transcription factor TFIIA complex
5669	10	0	0	0	1	1	1	0	0	0.9911	transcription factor TFIID complex
5667	89	0	0	0	1	1	1	0	0	0.9934	transcription factor complex
5666	16	0	0	0	1	1	1	0	0	0.9765	DNA-directed RNA polymerase III complex
5665	14	0	0	0	1	1	1	0	0	1.0017	DNA-directed RNA polymerase II, core complex
5663	1	0	0	0	1	1	1	0	0	0.9738	DNA replication factor C complex
5662	4	0	0	0	1	1	1	0	0	0.9923	DNA replication factor A complex
5658	2	0	0	0	1	1	1	0	0	0.9932	alpha DNA polymerase:primase complex
5657	21	0	0	0	1	1	1	0	0	0.999	replication fork
5656	1	0	0	0	1	1	1	0	0	0.9738	nuclear pre-replicative complex
5655	1	0	0	0	1	1	1	0	0	0.9738	nucleolar ribonuclease P complex
5654	185	0	0	0	1	1	1	0	0	0.9921	nucleoplasm
5652	3	0	0	0	1	1	1	0	0	0.9983	nuclear lamina
5643	31	0	0	0	1	1	1	0	0	0.943	nuclear pore
5640	2	0	0	0	1	1	1	0	0	0.9932	nuclear outer membrane
5639	3	0	0	0	1	1	1	0	0	0.9983	integral component of nuclear inner membrane
5638	2	0	0	0	1	1	1	0	0	0.9932	lamin filament
5637	7	0	0	0	1	1	1	0	0	0.8895	nuclear inner membrane
5635	76	0	0	0	1	1	1	0	0	0.9743	nuclear envelope
5605	3	0	0	0	1	1	1	0	0	0.9983	basal lamina
5604	21	0	0	0	1	1	1	0	0	0.999	basement membrane
5587	1	0	0	0	1	1	1	0	0	0.9738	collagen type IV trimer
5581	172	0	0	0	1	1	1	0	0	1.001	collagen trimer
5575	10816	0	0	25	1	1	1	0	0	0.9326	cellular_component
2116	2	0	0	0	1	1	1	0	0	0.9932	semaphorin receptor complex
2102	1	0	0	0	1	1	1	0	0	0.9738	podosome
1940	1	0	0	0	1	1	1	0	0	0.9738	male pronucleus
1891	5	0	0	0	1	1	1	0	0	0.9933	phagocytic cup
1726	2	0	0	0	1	1	1	0	0	0.9932	ruffle
1725	2	0	0	0	1	1	1	0	0	0.9932	stress fiber
974	8	0	0	0	1	1	1	0	0	0.9496	Prp19 complex
940	1	0	0	0	1	1	1	0	0	0.9738	condensed chromosome outer kinetochore
938	4	0	0	0	1	1	1	0	0	0.9923	GARP complex
932	31	0	0	0	1	1	1	0	0	0.943	cytoplasmic mRNA processing body
930	1	0	0	0	1	1	1	0	0	0.9738	gamma-tubulin complex
922	21	0	0	0	1	1	1	0	0	0.999	spindle pole
839	1	0	0	0	1	1	1	0	0	0.9738	Hrd1p ubiquitin ligase ERAD-L complex
838	1	0	0	0	1	1	1	0	0	0.9738	Hrd1p ubiquitin ligase ERAD-M complex
836	4	0	0	0	1	1	1	0	0	0.9923	Hrd1p ubiquitin ligase complex
835	4	0	0	0	1	1	1	0	0	0.9923	ER ubiquitin ligase complex
814	3	0	0	0	1	1	1	0	0	0.9983	ESCRT II complex
813	4	0	0	0	1	1	1	0	0	0.9923	ESCRT I complex
812	1	0	0	0	1	1	1	0	0	0.9738	Swr1 complex
811	3	0	0	0	1	1	1	0	0	0.9983	GINS complex
808	2	0	0	0	1	1	1	0	0	0.9932	origin recognition complex
805	6	0	0	0	1	1	1	0	0	0.993	X chromosome
803	9	0	0	0	1	1	1	0	0	0.9165	sex chromosome
801	4	0	0	0	1	1	1	0	0	0.9923	central element
800	5	0	0	0	1	1	1	0	0	0.9933	lateral element
799	2	0	0	0	1	1	1	0	0	0.9932	nuclear condensin complex
796	3	0	0	0	1	1	1	0	0	0.9983	condensin complex
795	12	0	0	0	1	1	1	0	0	0.9996	synaptonemal complex
794	49	0	0	0	1	1	1	0	0	0.948	condensed nuclear chromosome
793	92	0	0	0	1	1	1	0	0	1.0005	condensed chromosome
792	7	0	0	0	1	1	1	0	0	0.8895	heterochromatin
790	43	0	0	0	1	1	1	0	0	0.8993	nuclear chromatin
788	5	0	0	0	1	1	1	0	0	0.9933	nuclear nucleosome
786	89	0	0	0	1	1	1	0	0	0.9934	nucleosome
785	136	0	0	0	1	1	1	0	0	1.0013	chromatin
784	10	0	0	0	1	1	1	0	0	0.9911	nuclear chromosome, telomeric region
781	15	0	0	0	1	1	1	0	0	0.9987	chromosome, telomeric region
780	6	0	0	0	1	1	1	0	0	0.993	condensed nuclear chromosome, centromeric region
779	25	0	0	0	1	1	1	0	0	0.9941	condensed chromosome, centromeric region
778	4	0	0	0	1	1	1	0	0	0.9923	condensed nuclear chromosome kinetochore
777	19	0	0	0	1	1	1	0	0	0.9734	condensed chromosome kinetochore
776	34	0	0	0	1	1	1	0	0	1.002	kinetochore
775	44	0	0	0	1	1	1	0	0	0.9128	chromosome, centromeric region
506	2	0	0	0	1	1	1	0	0	0.9932	glycosylphosphatidylinositol-N-acetylglucosaminyltransferase (GPI-GnT) complex
502	45	0	0	0	1	1	1	0	0	0.995	proteasome complex
445	2	0	0	0	1	1	1	0	0	0.9932	THO complex part of transcription export complex
439	5	0	0	0	1	1	1	0	0	0.9933	core TFIIH complex
428	71	0	0	0	1	1	1	0	0	0.9933	DNA-directed RNA polymerase complex
421	5	0	0	0	1	1	1	0	0	0.9933	autophagosome membrane
408	1	0	0	0	1	1	1	0	0	0.9738	EKC/KEOPS complex
407	16	0	0	0	1	1	1	0	0	0.9765	pre-autophagosomal structure
347	5	0	0	0	1	1	1	0	0	0.9933	THO complex
346	2	0	0	0	1	1	1	0	0	0.9932	transcription export complex
315	21	0	0	0	1	1	1	0	0	0.999	organellar large ribosomal subunit
314	24	0	0	0	1	1	1	0	0	0.9927	organellar small ribosomal subunit
313	48	0	0	0	1	1	1	0	0	0.9899	organellar ribosome
307	7	0	0	0	1	1	1	0	0	0.8895	cyclin-dependent protein kinase holoenzyme complex
276	7	0	0	0	1	1	1	0	0	0.8895	mitochondrial proton-transporting ATP synthase complex, coupling factor F(o)
275	4	0	0	0	1	1	1	0	0	0.9923	mitochondrial proton-transporting ATP synthase complex, catalytic core F(1)
243	6	0	0	0	1	1	1	0	0	0.993	commitment complex
242	4	0	0	0	1	1	1	0	0	0.9923	pericentriolar material
235	7	0	0	0	1	1	1	0	0	0.8895	astral microtubule
228	126	0	0	0	1	1	1	0	0	0.9954	nuclear chromosome
221	2	0	0	0	1	1	1	0	0	0.9932	vacuolar proton-transporting V-type ATPase, V1 domain
220	8	0	0	0	1	1	1	0	0	0.9496	vacuolar proton-transporting V-type ATPase, V0 domain
214	2	0	0	0	1	1	1	0	0	0.9932	tRNA-intron endonuclease complex
178	12	0	0	0	1	1	1	0	0	0.9996	exosome (RNase complex)
177	8	0	0	0	1	1	1	0	0	0.9496	cytoplasmic exosome (RNase complex)
176	11	0	0	0	1	1	1	0	0	0.99	nuclear exosome (RNase complex)
172	1	0	0	0	1	1	1	0	0	0.9738	ribonuclease MRP complex
164	4	0	0	0	1	1	1	0	0	0.9923	protein phosphatase type 1 complex
159	7	0	0	0	1	1	1	0	0	0.8895	protein phosphatase type 2A complex
153	8	0	0	0	1	1	1	0	0	0.9496	cytoplasmic ubiquitin ligase complex
152	11	0	0	0	1	1	1	0	0	0.99	nuclear ubiquitin ligase complex
151	65	0	0	0	1	1	1	0	0	0.9842	ubiquitin ligase complex
145	8	0	0	0	1	1	1	0	0	0.9496	exocyst
139	106	0	0	0	1	1	1	0	0	0.9746	Golgi membrane
138	8	0	0	0	1	1	1	0	0	0.9496	Golgi trans cisterna
137	1	0	0	0	1	1	1	0	0	0.9738	Golgi cis cisterna
126	2	0	0	0	1	1	1	0	0	0.9932	transcription factor TFIIIB complex
124	1	0	0	0	1	1	1	0	0	0.9738	SAGA complex
123	14	0	0	0	1	1	1	0	0	1.0017	histone acetyltransferase complex
120	1	0	0	0	1	1	1	0	0	0.9738	RNA polymerase I transcription factor complex
118	10	0	0	0	1	1	1	0	0	0.9911	histone deacetylase complex
111	1	0	0	0	1	1	1	0	0	0.9738	nucleotide-excision repair factor 2 complex
110	1	0	0	0	1	1	1	0	0	0.9738	nucleotide-excision repair factor 1 complex
109	3	0	0	0	1	1	1	0	0	0.9983	nucleotide-excision repair complex
15	1	0	0	0	1	1	1	0	0	0.9738	phosphopyruvate hydratase complex

## Sheet: Cellular Component SNPs
GO ID	Category	Gene	Change	Gene ID
GO:0005575	cellular_component	PPFR-1	changed	WBGENE00008878|ppfr-1
GO:0005575	cellular_component	F26F2.7	changed	F26F2.7|WBGENE00009172
GO:0005575	cellular_component	SYD-2	changed	WBGENE00006364|syd-2
GO:0005575	cellular_component	FER-1	changed	WBGENE00001414|fer-1
GO:0005575	cellular_component	SET-29	changed	WBGENE00022371|set-29
GO:0005575	cellular_component	Y34B4A.2	changed	WBGENE00021319|Y34B4A.2
GO:0005575	cellular_component	TTN-1	changed	WBGENE00006436|ttn-1
GO:0005575	cellular_component	TIR-1	changed	WBGENE00006575|tir-1
GO:0005575	cellular_component	SLT-1	changed	WBGENE00004854|slt-1
GO:0005575	cellular_component	MATH-33	changed	WBGENE00010406|math-33
GO:0005575	cellular_component	PPH-4.1	changed	WBGENE00004085|pph-4.1
GO:0005575	cellular_component	F10F2.2	changed	F10F2.2|WBGENE00008654
GO:0005575	cellular_component	T21H3.5	changed	T21H3.5|WBGENE00020664
GO:0005575	cellular_component	LGC-29	changed	WBGENE00044528|lgc-29
GO:0005575	cellular_component	AC3.12	changed	AC3.12|WBGENE00077503
GO:0005575	cellular_component	T19D12.1	changed	T19D12.1|WBGENE00020576
GO:0005575	cellular_component	CED-12	changed	WBGENE00000426|ced-12
GO:0005575	cellular_component	FKH-9	changed	WBGENE00001441|fkh-9
GO:0005575	cellular_component	TWK-17	changed	WBGENE00006671|twk-17
GO:0005575	cellular_component	Y51H7C.10	changed	WBGENE00021788|Y51H7C.10
GO:0005575	cellular_component	Y16B4A.2	changed	WBGENE00012445|Y16B4A.2
GO:0005575	cellular_component	MRP-7	changed	WBGENE00003413|mrp-7
GO:0005575	cellular_component	Y82E9BR.2	changed	WBGENE00022335|Y82E9BR.2
GO:0005575	cellular_component	OAC-43	changed	WBGENE00011653|oac-43
GO:0005575	cellular_component	Y41E3.7	changed	WBGENE00012765|Y41E3.7
GO:0045202	synapse	SYD-2	changed	WBGENE00006364|syd-2
GO:0043226	organelle	TTN-1	changed	WBGENE00006436|ttn-1
GO:0043226	organelle	FER-1	changed	WBGENE00001414|fer-1
GO:0043226	organelle	MATH-33	changed	WBGENE00010406|math-33
GO:0043226	organelle	SET-29	changed	WBGENE00022371|set-29
GO:0043226	organelle	PPH-4.1	changed	WBGENE00004085|pph-4.1
GO:0043226	organelle	Y82E9BR.2	changed	WBGENE00022335|Y82E9BR.2
GO:0043226	organelle	Y34B4A.2	changed	WBGENE00021319|Y34B4A.2
GO:0043226	organelle	FKH-9	changed	WBGENE00001441|fkh-9
GO:0032991	macromolecular_complex	TTN-1	changed	WBGENE00006436|ttn-1
GO:0032991	macromolecular_complex	Y82E9BR.2	changed	WBGENE00022335|Y82E9BR.2
GO:0032991	macromolecular_complex	CED-12	changed	WBGENE00000426|ced-12
GO:0031974	membrane-enclosed_lumen	SET-29	changed	WBGENE00022371|set-29
GO:0031012	extracellular_matrix	SLT-1	changed	WBGENE00004854|slt-1
GO:0030054	cell_junction	SYD-2	changed	WBGENE00006364|syd-2
GO:0016020	membrane	LGC-29	changed	WBGENE00044528|lgc-29
GO:0016020	membrane	AC3.12	changed	AC3.12|WBGENE00077503
GO:0016020	membrane	F26F2.7	changed	F26F2.7|WBGENE00009172
GO:0016020	membrane	PPFR-1	changed	WBGENE00008878|ppfr-1
GO:0016020	membrane	FER-1	changed	WBGENE00001414|fer-1
GO:0016020	membrane	T19D12.1	changed	T19D12.1|WBGENE00020576
GO:0016020	membrane	CED-12	changed	WBGENE00000426|ced-12
GO:0016020	membrane	TWK-17	changed	WBGENE00006671|twk-17
GO:0016020	membrane	Y51H7C.10	changed	WBGENE00021788|Y51H7C.10
GO:0016020	membrane	Y16B4A.2	changed	WBGENE00012445|Y16B4A.2
GO:0016020	membrane	MRP-7	changed	WBGENE00003413|mrp-7
GO:0016020	membrane	T21H3.5	changed	T21H3.5|WBGENE00020664
GO:0016020	membrane	OAC-43	changed	WBGENE00011653|oac-43
GO:0016020	membrane	Y41E3.7	changed	WBGENE00012765|Y41E3.7
GO:0005623	cell	PPFR-1	changed	WBGENE00008878|ppfr-1
GO:0005623	cell	SYD-2	changed	WBGENE00006364|syd-2
GO:0005623	cell	FER-1	changed	WBGENE00001414|fer-1
GO:0005623	cell	SET-29	changed	WBGENE00022371|set-29
GO:0005623	cell	Y34B4A.2	changed	WBGENE00021319|Y34B4A.2
GO:0005623	cell	CED-12	changed	WBGENE00000426|ced-12
GO:0005623	cell	FKH-9	changed	WBGENE00001441|fkh-9
GO:0005623	cell	TWK-17	changed	WBGENE00006671|twk-17
GO:0005623	cell	TTN-1	changed	WBGENE00006436|ttn-1
GO:0005623	cell	TIR-1	changed	WBGENE00006575|tir-1
GO:0005623	cell	MATH-33	changed	WBGENE00010406|math-33
GO:0005623	cell	PPH-4.1	changed	WBGENE00004085|pph-4.1
GO:0005623	cell	F10F2.2	changed	F10F2.2|WBGENE00008654
GO:0005623	cell	Y82E9BR.2	changed	WBGENE00022335|Y82E9BR.2
GO:0005576	extracellular_region	SLT-1	changed	WBGENE00004854|slt-1
GO:0044456	synapse_part	SYD-2	changed	WBGENE00006364|syd-2
GO:0044422	organelle_part	TTN-1	changed	WBGENE00006436|ttn-1
GO:0044422	organelle_part	FER-1	changed	WBGENE00001414|fer-1
GO:0044422	organelle_part	SET-29	changed	WBGENE00022371|set-29
GO:0044422	organelle_part	PPH-4.1	changed	WBGENE00004085|pph-4.1
GO:0044422	organelle_part	Y82E9BR.2	changed	WBGENE00022335|Y82E9BR.2
GO:0043228	non-membrane-bounded_organelle	TTN-1	changed	WBGENE00006436|ttn-1
GO:0043228	non-membrane-bounded_organelle	SET-29	changed	WBGENE00022371|set-29
GO:0043228	non-membrane-bounded_organelle	PPH-4.1	changed	WBGENE00004085|pph-4.1
GO:0043227	membrane-bounded_organelle	FER-1	changed	WBGENE00001414|fer-1
GO:0043227	membrane-bounded_organelle	MATH-33	changed	WBGENE00010406|math-33
GO:0043227	membrane-bounded_organelle	SET-29	changed	WBGENE00022371|set-29
GO:0043227	membrane-bounded_organelle	Y82E9BR.2	changed	WBGENE00022335|Y82E9BR.2
GO:0043227	membrane-bounded_organelle	Y34B4A.2	changed	WBGENE00021319|Y34B4A.2
GO:0043227	membrane-bounded_organelle	FKH-9	changed	WBGENE00001441|fkh-9
GO:1990904	ribonucleoprotein_complex	Y82E9BR.2	changed	WBGENE00022335|Y82E9BR.2
GO:0043234	protein_complex	TTN-1	changed	WBGENE00006436|ttn-1
GO:0043234	protein_complex	Y82E9BR.2	changed	WBGENE00022335|Y82E9BR.2
GO:0043234	protein_complex	CED-12	changed	WBGENE00000426|ced-12
GO:0044425	membrane_part	TWK-17	changed	WBGENE00006671|twk-17
GO:0044425	membrane_part	Y51H7C.10	changed	WBGENE00021788|Y51H7C.10
GO:0044425	membrane_part	LGC-29	changed	WBGENE00044528|lgc-29
GO:0044425	membrane_part	F26F2.7	changed	F26F2.7|WBGENE00009172
GO:0044425	membrane_part	PPFR-1	changed	WBGENE00008878|ppfr-1
GO:0044425	membrane_part	Y16B4A.2	changed	WBGENE00012445|Y16B4A.2
GO:0044425	membrane_part	MRP-7	changed	WBGENE00003413|mrp-7
GO:0044425	membrane_part	FER-1	changed	WBGENE00001414|fer-1
GO:0044425	membrane_part	T19D12.1	changed	T19D12.1|WBGENE00020576
GO:0044425	membrane_part	T21H3.5	changed	T21H3.5|WBGENE00020664
GO:0044425	membrane_part	OAC-43	changed	WBGENE00011653|oac-43
GO:0044425	membrane_part	Y41E3.7	changed	WBGENE00012765|Y41E3.7
GO:0098805	whole_membrane	Y16B4A.2	changed	WBGENE00012445|Y16B4A.2
GO:0098805	whole_membrane	FER-1	changed	WBGENE00001414|fer-1
GO:0044464	cell_part	PPFR-1	changed	WBGENE00008878|ppfr-1
GO:0044464	cell_part	SYD-2	changed	WBGENE00006364|syd-2
GO:0044464	cell_part	FER-1	changed	WBGENE00001414|fer-1
GO:0044464	cell_part	SET-29	changed	WBGENE00022371|set-29
GO:0044464	cell_part	Y34B4A.2	changed	WBGENE00021319|Y34B4A.2
GO:0044464	cell_part	CED-12	changed	WBGENE00000426|ced-12
GO:0044464	cell_part	FKH-9	changed	WBGENE00001441|fkh-9
GO:0044464	cell_part	TWK-17	changed	WBGENE00006671|twk-17
GO:0044464	cell_part	TTN-1	changed	WBGENE00006436|ttn-1
GO:0044464	cell_part	TIR-1	changed	WBGENE00006575|tir-1
GO:0044464	cell_part	MATH-33	changed	WBGENE00010406|math-33
GO:0044464	cell_part	PPH-4.1	changed	WBGENE00004085|pph-4.1
GO:0044464	cell_part	F10F2.2	changed	F10F2.2|WBGENE00008654
GO:0044464	cell_part	Y82E9BR.2	changed	WBGENE00022335|Y82E9BR.2
GO:0044421	extracellular_region_part	SLT-1	changed	WBGENE00004854|slt-1
GO:0043233	organelle_lumen	SET-29	changed	WBGENE00022371|set-29
GO:0031090	organelle_membrane	FER-1	changed	WBGENE00001414|fer-1
GO:0098589	membrane_region	Y16B4A.2	changed	WBGENE00012445|Y16B4A.2
GO:0098589	membrane_region	FER-1	changed	WBGENE00001414|fer-1
GO:0031224	intrinsic_component_of_membrane	TWK-17	changed	WBGENE00006671|twk-17
GO:0031224	intrinsic_component_of_membrane	Y51H7C.10	changed	WBGENE00021788|Y51H7C.10
GO:0031224	intrinsic_component_of_membrane	LGC-29	changed	WBGENE00044528|lgc-29
GO:0031224	intrinsic_component_of_membrane	F26F2.7	changed	F26F2.7|WBGENE00009172
GO:0031224	intrinsic_component_of_membrane	PPFR-1	changed	WBGENE00008878|ppfr-1
GO:0031224	intrinsic_component_of_membrane	MRP-7	changed	WBGENE00003413|mrp-7
GO:0031224	intrinsic_component_of_membrane	FER-1	changed	WBGENE00001414|fer-1
GO:0031224	intrinsic_component_of_membrane	T19D12.1	changed	T19D12.1|WBGENE00020576
GO:0031224	intrinsic_component_of_membrane	T21H3.5	changed	T21H3.5|WBGENE00020664
GO:0031224	intrinsic_component_of_membrane	OAC-43	changed	WBGENE00011653|oac-43
GO:0031224	intrinsic_component_of_membrane	Y41E3.7	changed	WBGENE00012765|Y41E3.7
GO:0097458	neuron_part	TIR-1	changed	WBGENE00006575|tir-1
GO:0097458	neuron_part	SYD-2	changed	WBGENE00006364|syd-2
GO:0097458	neuron_part	FER-1	changed	WBGENE00001414|fer-1
GO:0071944	cell_periphery	TWK-17	changed	WBGENE00006671|twk-17
GO:0071944	cell_periphery	FER-1	changed	WBGENE00001414|fer-1
GO:0071944	cell_periphery	CED-12	changed	WBGENE00000426|ced-12
GO:0044297	cell_body	FER-1	changed	WBGENE00001414|fer-1
GO:0042995	cell_projection	TIR-1	changed	WBGENE00006575|tir-1
GO:0042995	cell_projection	SYD-2	changed	WBGENE00006364|syd-2
GO:0042995	cell_projection	FER-1	changed	WBGENE00001414|fer-1
GO:0012505	endomembrane_system	Y34B4A.2	changed	WBGENE00021319|Y34B4A.2
GO:0005622	intracellular	TTN-1	changed	WBGENE00006436|ttn-1
GO:0005622	intracellular	TIR-1	changed	WBGENE00006575|tir-1
GO:0005622	intracellular	PPFR-1	changed	WBGENE00008878|ppfr-1
GO:0005622	intracellular	SYD-2	changed	WBGENE00006364|syd-2
GO:0005622	intracellular	MATH-33	changed	WBGENE00010406|math-33
GO:0005622	intracellular	PPH-4.1	changed	WBGENE00004085|pph-4.1
GO:0005622	intracellular	F10F2.2	changed	F10F2.2|WBGENE00008654
GO:0005622	intracellular	SET-29	changed	WBGENE00022371|set-29
GO:0005622	intracellular	Y82E9BR.2	changed	WBGENE00022335|Y82E9BR.2
GO:0005622	intracellular	Y34B4A.2	changed	WBGENE00021319|Y34B4A.2
GO:0005622	intracellular	CED-12	changed	WBGENE00000426|ced-12
GO:0005622	intracellular	FKH-9	changed	WBGENE00001441|fkh-9
GO:0005615	extracellular_space	SLT-1	changed	WBGENE00004854|slt-1
GO:0005578	proteinaceous_extracellular_matrix	SLT-1	changed	WBGENE00004854|slt-1
GO:0098857	membrane_microdomain	Y16B4A.2	changed	WBGENE00012445|Y16B4A.2
GO:0031300	intrinsic_component_of_organelle_membrane	FER-1	changed	WBGENE00001414|fer-1
GO:0016021	integral_component_of_membrane	TWK-17	changed	WBGENE00006671|twk-17
GO:0016021	integral_component_of_membrane	Y51H7C.10	changed	WBGENE00021788|Y51H7C.10
GO:0016021	integral_component_of_membrane	LGC-29	changed	WBGENE00044528|lgc-29
GO:0016021	integral_component_of_membrane	F26F2.7	changed	F26F2.7|WBGENE00009172
GO:0016021	integral_component_of_membrane	PPFR-1	changed	WBGENE00008878|ppfr-1
GO:0016021	integral_component_of_membrane	MRP-7	changed	WBGENE00003413|mrp-7
GO:0016021	integral_component_of_membrane	FER-1	changed	WBGENE00001414|fer-1
GO:0016021	integral_component_of_membrane	T19D12.1	changed	T19D12.1|WBGENE00020576
GO:0016021	integral_component_of_membrane	T21H3.5	changed	T21H3.5|WBGENE00020664
GO:0016021	integral_component_of_membrane	OAC-43	changed	WBGENE00011653|oac-43
GO:0016021	integral_component_of_membrane	Y41E3.7	changed	WBGENE00012765|Y41E3.7
GO:0098793	presynapse	SYD-2	changed	WBGENE00006364|syd-2
GO:0043005	neuron_projection	TIR-1	changed	WBGENE00006575|tir-1
GO:0043005	neuron_projection	SYD-2	changed	WBGENE00006364|syd-2
GO:0036477	somatodendritic_compartment	FER-1	changed	WBGENE00001414|fer-1
GO:0005886	plasma_membrane	TWK-17	changed	WBGENE00006671|twk-17
GO:0005886	plasma_membrane	FER-1	changed	WBGENE00001414|fer-1
GO:0005886	plasma_membrane	CED-12	changed	WBGENE00000426|ced-12
GO:0044463	cell_projection_part	FER-1	changed	WBGENE00001414|fer-1
GO:0031143	pseudopodium	FER-1	changed	WBGENE00001414|fer-1
GO:0044424	intracellular_part	TTN-1	changed	WBGENE00006436|ttn-1
GO:0044424	intracellular_part	TIR-1	changed	WBGENE00006575|tir-1
GO:0044424	intracellular_part	PPFR-1	changed	WBGENE00008878|ppfr-1
GO:0044424	intracellular_part	SYD-2	changed	WBGENE00006364|syd-2
GO:0044424	intracellular_part	MATH-33	changed	WBGENE00010406|math-33
GO:0044424	intracellular_part	PPH-4.1	changed	WBGENE00004085|pph-4.1
GO:0044424	intracellular_part	F10F2.2	changed	F10F2.2|WBGENE00008654
GO:0044424	intracellular_part	SET-29	changed	WBGENE00022371|set-29
GO:0044424	intracellular_part	Y82E9BR.2	changed	WBGENE00022335|Y82E9BR.2
GO:0044424	intracellular_part	Y34B4A.2	changed	WBGENE00021319|Y34B4A.2
GO:0044424	intracellular_part	CED-12	changed	WBGENE00000426|ced-12
GO:0044424	intracellular_part	FKH-9	changed	WBGENE00001441|fkh-9
GO:0045121	membrane_raft	Y16B4A.2	changed	WBGENE00012445|Y16B4A.2
GO:0031301	integral_component_of_organelle_membrane	FER-1	changed	WBGENE00001414|fer-1
GO:0048786	presynaptic_active_zone	SYD-2	changed	WBGENE00006364|syd-2
GO:0030424	axon	TIR-1	changed	WBGENE00006575|tir-1
GO:0030424	axon	SYD-2	changed	WBGENE00006364|syd-2
GO:0043025	neuronal_cell_body	FER-1	changed	WBGENE00001414|fer-1
GO:0044459	plasma_membrane_part	TWK-17	changed	WBGENE00006671|twk-17
GO:0044459	plasma_membrane_part	FER-1	changed	WBGENE00001414|fer-1
GO:0043229	intracellular_organelle	TTN-1	changed	WBGENE00006436|ttn-1
GO:0043229	intracellular_organelle	MATH-33	changed	WBGENE00010406|math-33
GO:0043229	intracellular_organelle	SET-29	changed	WBGENE00022371|set-29
GO:0043229	intracellular_organelle	PPH-4.1	changed	WBGENE00004085|pph-4.1
GO:0043229	intracellular_organelle	Y82E9BR.2	changed	WBGENE00022335|Y82E9BR.2
GO:0043229	intracellular_organelle	Y34B4A.2	changed	WBGENE00021319|Y34B4A.2
GO:0043229	intracellular_organelle	FKH-9	changed	WBGENE00001441|fkh-9
GO:0032045	guanyl-nucleotide_exchange_factor_complex	CED-12	changed	WBGENE00000426|ced-12
GO:0030529	intracellular_ribonucleoprotein_complex	Y82E9BR.2	changed	WBGENE00022335|Y82E9BR.2
GO:0005737	cytoplasm	TTN-1	changed	WBGENE00006436|ttn-1
GO:0005737	cytoplasm	TIR-1	changed	WBGENE00006575|tir-1
GO:0005737	cytoplasm	PPFR-1	changed	WBGENE00008878|ppfr-1
GO:0005737	cytoplasm	SYD-2	changed	WBGENE00006364|syd-2
GO:0005737	cytoplasm	MATH-33	changed	WBGENE00010406|math-33
GO:0005737	cytoplasm	PPH-4.1	changed	WBGENE00004085|pph-4.1
GO:0005737	cytoplasm	F10F2.2	changed	F10F2.2|WBGENE00008654
GO:0005737	cytoplasm	Y34B4A.2	changed	WBGENE00021319|Y34B4A.2
GO:0005737	cytoplasm	CED-12	changed	WBGENE00000426|ced-12
GO:0097445	presynaptic_active_zone_dense_projection	SYD-2	changed	WBGENE00006364|syd-2
GO:0098590	plasma_membrane_region	FER-1	changed	WBGENE00001414|fer-1
GO:0044298	cell_body_membrane	FER-1	changed	WBGENE00001414|fer-1
GO:0031226	intrinsic_component_of_plasma_membrane	TWK-17	changed	WBGENE00006671|twk-17
GO:0031226	intrinsic_component_of_plasma_membrane	FER-1	changed	WBGENE00001414|fer-1
GO:0044446	intracellular_organelle_part	TTN-1	changed	WBGENE00006436|ttn-1
GO:0044446	intracellular_organelle_part	SET-29	changed	WBGENE00022371|set-29
GO:0044446	intracellular_organelle_part	PPH-4.1	changed	WBGENE00004085|pph-4.1
GO:0044446	intracellular_organelle_part	Y82E9BR.2	changed	WBGENE00022335|Y82E9BR.2
GO:0043232	intracellular_non-membrane-bounded_organelle	TTN-1	changed	WBGENE00006436|ttn-1
GO:0043232	intracellular_non-membrane-bounded_organelle	SET-29	changed	WBGENE00022371|set-29
GO:0043232	intracellular_non-membrane-bounded_organelle	PPH-4.1	changed	WBGENE00004085|pph-4.1
GO:0043231	intracellular_membrane-bounded_organelle	MATH-33	changed	WBGENE00010406|math-33
GO:0043231	intracellular_membrane-bounded_organelle	SET-29	changed	WBGENE00022371|set-29
GO:0043231	intracellular_membrane-bounded_organelle	Y82E9BR.2	changed	WBGENE00022335|Y82E9BR.2
GO:0043231	intracellular_membrane-bounded_organelle	Y34B4A.2	changed	WBGENE00021319|Y34B4A.2
GO:0043231	intracellular_membrane-bounded_organelle	FKH-9	changed	WBGENE00001441|fkh-9
GO:0044444	cytoplasmic_part	TTN-1	changed	WBGENE00006436|ttn-1
GO:0044444	cytoplasmic_part	Y34B4A.2	changed	WBGENE00021319|Y34B4A.2
GO:0031253	cell_projection_membrane	FER-1	changed	WBGENE00001414|fer-1
GO:0032809	neuronal_cell_body_membrane	FER-1	changed	WBGENE00001414|fer-1
GO:0005887	integral_component_of_plasma_membrane	TWK-17	changed	WBGENE00006671|twk-17
GO:0005887	integral_component_of_plasma_membrane	FER-1	changed	WBGENE00001414|fer-1
GO:0070013	intracellular_organelle_lumen	SET-29	changed	WBGENE00022371|set-29
GO:0043292	contractile_fiber	TTN-1	changed	WBGENE00006436|ttn-1
GO:0005856	cytoskeleton	TTN-1	changed	WBGENE00006436|ttn-1
GO:0005856	cytoskeleton	PPH-4.1	changed	WBGENE00004085|pph-4.1
GO:0005773	vacuole	Y34B4A.2	changed	WBGENE00021319|Y34B4A.2
GO:0005634	nucleus	MATH-33	changed	WBGENE00010406|math-33
GO:0005634	nucleus	SET-29	changed	WBGENE00022371|set-29
GO:0005634	nucleus	Y82E9BR.2	changed	WBGENE00022335|Y82E9BR.2
GO:0005634	nucleus	FKH-9	changed	WBGENE00001441|fkh-9
GO:0031260	pseudopodium_membrane	FER-1	changed	WBGENE00001414|fer-1
GO:0044449	contractile_fiber_part	TTN-1	changed	WBGENE00006436|ttn-1
GO:0030016	myofibril	TTN-1	changed	WBGENE00006436|ttn-1
GO:0044430	cytoskeletal_part	TTN-1	changed	WBGENE00006436|ttn-1
GO:0044430	cytoskeletal_part	PPH-4.1	changed	WBGENE00004085|pph-4.1
GO:0015630	microtubule_cytoskeleton	PPH-4.1	changed	WBGENE00004085|pph-4.1
GO:0015629	actin_cytoskeleton	TTN-1	changed	WBGENE00006436|ttn-1
GO:0005768	endosome	Y34B4A.2	changed	WBGENE00021319|Y34B4A.2
GO:0000323	lytic_vacuole	Y34B4A.2	changed	WBGENE00021319|Y34B4A.2
GO:0044428	nuclear_part	SET-29	changed	WBGENE00022371|set-29
GO:0044428	nuclear_part	Y82E9BR.2	changed	WBGENE00022335|Y82E9BR.2
GO:0036379	myofilament	TTN-1	changed	WBGENE00006436|ttn-1
GO:0030017	sarcomere	TTN-1	changed	WBGENE00006436|ttn-1
GO:0005815	microtubule_organizing_center	PPH-4.1	changed	WBGENE00004085|pph-4.1
GO:0016459	myosin_complex	TTN-1	changed	WBGENE00006436|ttn-1
GO:0070274	RES_complex	Y82E9BR.2	changed	WBGENE00022335|Y82E9BR.2
GO:0031981	nuclear_lumen	SET-29	changed	WBGENE00022371|set-29
GO:0030532	small_nuclear_ribonucleoprotein_complex	Y82E9BR.2	changed	WBGENE00022335|Y82E9BR.2
GO:0005681	spliceosomal_complex	Y82E9BR.2	changed	WBGENE00022335|Y82E9BR.2
GO:0005865	striated_muscle_thin_filament	TTN-1	changed	WBGENE00006436|ttn-1
GO:0031674	I_band	TTN-1	changed	WBGENE00006436|ttn-1
GO:0031672	A_band	TTN-1	changed	WBGENE00006436|ttn-1
GO:0005813	centrosome	PPH-4.1	changed	WBGENE00004085|pph-4.1
GO:0016460	myosin_II_complex	TTN-1	changed	WBGENE00006436|ttn-1
GO:0005730	nucleolus	SET-29	changed	WBGENE00022371|set-29
GO:0097525	spliceosomal_snRNP_complex	Y82E9BR.2	changed	WBGENE00022335|Y82E9BR.2
GO:0071013	catalytic_step_2_spliceosome	Y82E9BR.2	changed	WBGENE00022335|Y82E9BR.2
GO:0071011	precatalytic_spliceosome	Y82E9BR.2	changed	WBGENE00022335|Y82E9BR.2
GO:0030018	Z_disc	TTN-1	changed	WBGENE00006436|ttn-1
GO:0031430	M_band	TTN-1	changed	WBGENE00006436|ttn-1
GO:0005859	muscle_myosin_complex	TTN-1	changed	WBGENE00006436|ttn-1
GO:0005686	U2_snRNP	Y82E9BR.2	changed	WBGENE00022335|Y82E9BR.2

## Sheet: Molecular Function gas-1 RC
GO ID	Total	Under	Over	Change	P-Value (Under)	P-Value (Over)	P-Value (Changed)	FDR (Under)	FDR (Over)	FDR (Changed)	Term
97493	1	0	0	1	1	1	0.0033	0	0	0.3814	structural molecule activity conferring elasticity
70064	1	0	0	1	1	1	0.0033	0	0	0.3814	proline-rich region binding
51393	1	0	0	1	1	1	0.0033	0	0	0.3814	alpha-actinin binding
51371	1	0	0	1	1	1	0.0033	0	0	0.3814	muscle alpha-actinin binding
42805	1	0	0	1	1	1	0.0033	0	0	0.3814	actinin binding
4643	1	0	0	1	1	1	0.0033	0	0	0.3814	phosphoribosylaminoimidazolecarboxamide formyltransferase activity
4642	1	0	0	1	1	1	0.0033	0	0	0.3814	phosphoribosylformylglycinamidine synthase activity
3937	1	0	0	1	1	1	0.0033	0	0	0.3814	IMP cyclohydrolase activity
61629	2	0	0	1	1	1	0.0065	0	0	0.5166	RNA polymerase II sequence-specific DNA binding transcription factor binding
30159	2	0	0	1	1	1	0.0065	0	0	0.5166	receptor signaling complex scaffold activity
19238	2	0	0	1	1	1	0.0065	0	0	0.5166	cyclohydrolase activity
31267	44	0	0	2	1	1	0.009	0	0	0.4678	small GTPase binding
17016	44	0	0	2	1	1	0.009	0	0	0.4678	Ras GTPase binding
5547	3	0	0	1	1	1	0.0098	0	0	0.5558	phosphatidylinositol-3,4,5-trisphosphate binding
51020	47	0	0	2	1	1	0.0102	0	0	0.5229	GTPase binding
1901681	53	0	0	2	1	1	0.0129	0	0	0.5201	sulfur compound binding
80025	4	0	0	1	1	1	0.013	0	0	0.4939	phosphatidylinositol-3,5-bisphosphate binding
48495	4	0	0	1	1	1	0.013	0	0	0.4939	Roundabout binding
16742	4	0	0	1	1	1	0.013	0	0	0.4939	hydroxymethyl-, formyl- and related transferase activity
384	4	0	0	1	1	1	0.013	0	0	0.4939	first spliceosomal transesterification activity
19904	57	0	0	2	1	1	0.0148	0	0	0.479	protein domain specific binding
17124	5	0	0	1	1	1	0.0163	0	0	0.532	SH3 domain binding
70273	6	0	0	1	1	1	0.0195	0	0	0.5763	phosphatidylinositol-4-phosphate binding
8307	6	0	0	1	1	1	0.0195	0	0	0.5763	structural constituent of muscle
4721	177	0	0	3	1	1	0.0197	0	0	0.5564	phosphoprotein phosphatase activity
5543	70	0	0	2	1	1	0.0218	0	0	0.5495	phospholipid binding
32947	7	0	0	1	1	1	0.0227	0	0	0.571	protein complex scaffold
1902936	9	0	0	1	1	1	0.0291	0	0	0.6044	phosphatidylinositol bisphosphate binding
8201	9	0	0	1	1	1	0.0291	0	0	0.6044	heparin binding
5539	9	0	0	1	1	1	0.0291	0	0	0.6044	glycosaminoglycan binding
16814	13	0	0	1	1	1	0.0418	0	0	0.7087	hydrolase activity, acting on carbon-nitrogen (but not peptide) bonds, in cyclic amidines
16791	238	0	0	3	1	1	0.042	0	0	0.6875	phosphatase activity
4843	14	0	0	1	1	1	0.0449	0	0	0.6858	thiol-dependent ubiquitin-specific protease activity
4675	14	0	0	1	1	1	0.0449	0	0	0.6858	transmembrane receptor protein serine/threonine kinase activity
4725	104	0	0	2	1	1	0.0452	0	0	0.6676	protein tyrosine phosphatase activity
32403	109	0	0	2	1	1	0.0492	0	0	0.6713	protein complex binding
17137	16	0	0	1	1	1	0.0512	0	0	0.6597	Rab GTPase binding
16884	16	0	0	1	1	1	0.0512	0	0	0.6597	carbon-nitrogen ligase activity, with glutamine as amido-N-donor
42802	115	0	0	2	1	1	0.0541	0	0	0.6518	identical protein binding
5544	18	0	0	1	1	1	0.0574	0	0	0.6745	calcium-dependent phospholipid binding
16741	120	0	0	2	1	1	0.0584	0	0	0.6647	transferase activity, transferring one-carbon groups
5515	1822	0	0	10	1	1	0.059	0	0	0.6508	protein binding
43168	1330	0	0	8	1	1	0.0594	0	0	0.6377	anion binding
17048	19	0	0	1	1	1	0.0605	0	0	0.6338	Rho GTPase binding
4722	19	0	0	1	1	1	0.0605	0	0	0.6338	protein serine/threonine phosphatase activity
42578	278	0	0	3	1	1	0.0615	0	0	0.6246	phosphoric ester hydrolase activity
8289	137	0	0	2	1	1	0.0736	0	0	0.6831	lipid binding
1901981	24	0	0	1	1	1	0.0758	0	0	0.6611	phosphatidylinositol phosphate binding
70008	24	0	0	1	1	1	0.0758	0	0	0.6611	serine-type exopeptidase activity
4185	24	0	0	1	1	1	0.0758	0	0	0.6611	serine-type carboxypeptidase activity
16279	27	0	0	1	1	1	0.0849	0	0	0.6907	protein-lysine N-methyltransferase activity
16278	27	0	0	1	1	1	0.0849	0	0	0.6907	lysine N-methyltransferase activity
19199	28	0	0	1	1	1	0.0879	0	0	0.6882	transmembrane receptor protein kinase activity
51015	31	0	0	1	1	1	0.0969	0	0	0.6956	actin filament binding
1085	31	0	0	1	1	1	0.0969	0	0	0.6956	RNA polymerase II transcription factor binding
101005	33	0	0	1	1	1	0.1028	0	0	0.6916	ubiquitinyl hydrolase activity
36459	33	0	0	1	1	1	0.1028	0	0	0.6916	thiol-dependent ubiquitinyl hydrolase activity
62	35	0	0	1	1	1	0.1087	0	0	0.7001	fatty-acyl-CoA binding
16879	36	0	0	1	1	1	0.1116	0	0	0.7115	ligase activity, forming carbon-nitrogen bonds
19783	37	0	0	1	1	1	0.1146	0	0	0.7031	ubiquitin-like protein-specific protease activity
4180	37	0	0	1	1	1	0.1146	0	0	0.7031	carboxypeptidase activity
8170	38	0	0	1	1	1	0.1175	0	0	0.7039	N-methyltransferase activity
44877	182	0	0	2	1	1	0.1191	0	0	0.697	macromolecular complex binding
8276	39	0	0	1	1	1	0.1204	0	0	0.697	protein methyltransferase activity
35091	44	0	0	1	1	1	0.1348	0	0	0.7312	phosphatidylinositol binding
22842	48	0	0	1	1	1	0.1461	0	0	0.7479	narrow pore channel activity
22841	48	0	0	1	1	1	0.1461	0	0	0.7479	potassium ion leak channel activity
22840	48	0	0	1	1	1	0.1461	0	0	0.7479	leak channel activity
42803	50	0	0	1	1	1	0.1517	0	0	0.7543	protein homodimerization activity
149	50	0	0	1	1	1	0.1517	0	0	0.7543	SNARE binding
16810	51	0	0	1	1	1	0.1545	0	0	0.7566	hydrolase activity, acting on carbon-nitrogen (but not peptide) bonds
16787	1647	0	0	8	1	1	0.1574	0	0	0.7591	hydrolase activity
5085	58	0	0	1	1	1	0.1738	0	0	0.7871	guanyl-nucleotide exchange factor activity
19899	241	0	0	2	1	1	0.1863	0	0	0.7979	enzyme binding
4672	457	0	0	3	1	1	0.1869	0	0	0.789	protein kinase activity
17171	65	0	0	1	1	1	0.1927	0	0	0.7953	serine hydrolase activity
8236	65	0	0	1	1	1	0.1927	0	0	0.7953	serine-type peptidase activity
19901	69	0	0	1	1	1	0.2033	0	0	0.8089	protein kinase binding
19900	70	0	0	1	1	1	0.2059	0	0	0.8058	kinase binding
8757	71	0	0	1	1	1	0.2086	0	0	0.8002	S-adenosylmethionine-dependent methyltransferase activity
8238	74	0	0	1	1	1	0.2164	0	0	0.803	exopeptidase activity
3824	4110	0	0	16	1	1	0.2268	0	0	0.8107	catalytic activity
16788	506	0	0	3	1	1	0.2289	0	0	0.8027	hydrolase activity, acting on ester bonds
5267	80	0	0	1	1	1	0.2318	0	0	0.8045	potassium channel activity
3779	83	0	0	1	1	1	0.2394	0	0	0.8142	actin binding
16773	519	0	0	3	1	1	0.2403	0	0	0.8067	phosphotransferase activity, alcohol group as acceptor
15079	88	0	0	1	1	1	0.2519	0	0	0.8022	potassium ion transmembrane transporter activity
8134	88	0	0	1	1	1	0.2519	0	0	0.8022	transcription factor binding
42626	95	0	0	1	1	1	0.269	0	0	0.8135	ATPase activity, coupled to transmembrane movement of substances
16820	97	0	0	1	1	1	0.2739	0	0	0.8125	hydrolase activity, acting on acid anhydrides, catalyzing transmembrane movement of substances
8234	97	0	0	1	1	1	0.2739	0	0	0.8125	cysteine-type peptidase activity
5216	314	0	0	2	1	1	0.275	0	0	0.8079	ion channel activity
43492	101	0	0	1	1	1	0.2834	0	0	0.8066	ATPase activity, coupled to movement of substances
15405	101	0	0	1	1	1	0.2834	0	0	0.8066	P-P-bond-hydrolysis-driven transmembrane transporter activity
15399	101	0	0	1	1	1	0.2834	0	0	0.8066	primary active transmembrane transporter activity
22838	323	0	0	2	1	1	0.286	0	0	0.8029	substrate-specific channel activity
16301	580	0	0	3	1	1	0.2953	0	0	0.8074	kinase activity
43167	2813	0	0	11	1	1	0.2992	0	0	0.8032	ion binding
981	113	0	0	1	1	1	0.3114	0	0	0.8098	RNA polymerase II transcription factor activity, sequence-specific DNA binding
50662	115	0	0	1	1	1	0.316	0	0	0.799	coenzyme binding
8168	115	0	0	1	1	1	0.316	0	0	0.799	methyltransferase activity
5230	115	0	0	1	1	1	0.316	0	0	0.799	extracellular ligand-gated ion channel activity
22803	355	0	0	2	1	1	0.3252	0	0	0.7949	passive transmembrane transporter activity
15267	355	0	0	2	1	1	0.3252	0	0	0.7949	channel activity
5524	896	0	0	4	1	1	0.3374	0	0	0.8058	ATP binding
32559	897	0	0	4	1	1	0.3381	0	0	0.7999	adenyl ribonucleotide binding
30554	898	0	0	4	1	1	0.3389	0	0	0.7941	adenyl nucleotide binding
97367	1185	0	0	5	1	1	0.3462	0	0	0.7938	carbohydrate derivative binding
15276	131	0	0	1	1	1	0.3515	0	0	0.7914	ligand-gated ion channel activity
70011	381	0	0	2	1	1	0.3568	0	0	0.7889	peptidase activity, acting on L-amino acid peptides
22834	134	0	0	1	1	1	0.3579	0	0	0.789	ligand-gated channel activity
5488	5362	0	0	19	1	1	0.3687	0	0	0.7938	binding
8233	403	0	0	2	1	1	0.3831	0	0	0.7954	peptidase activity
8092	150	0	0	1	1	1	0.3912	0	0	0.7923	cytoskeletal protein binding
16772	691	0	0	3	1	1	0.3972	0	0	0.7875	transferase activity, transferring phosphorus-containing groups
16747	157	0	0	1	1	1	0.4053	0	0	0.7884	transferase activity, transferring acyl groups other than amino-acyl groups
16740	1576	0	0	6	1	1	0.4151	0	0	0.7831	transferase activity
16874	165	0	0	1	1	1	0.421	0	0	0.7792	ligase activity
5198	437	0	0	2	1	1	0.4229	0	0	0.7748	structural molecule activity
5509	172	0	0	1	1	1	0.4344	0	0	0.7766	calcium ion binding
22836	181	0	0	1	1	1	0.4512	0	0	0.7996	gated channel activity
1901265	1352	0	0	5	1	1	0.4611	0	0	0.8008	nucleoside phosphate binding
166	1352	0	0	5	1	1	0.4611	0	0	0.8008	nucleotide binding
48037	189	0	0	1	1	1	0.4657	0	0	0.7972	cofactor binding
5261	195	0	0	1	1	1	0.4763	0	0	0.7951	cation channel activity
46983	198	0	0	1	1	1	0.4816	0	0	0.7935	protein dimerization activity
35639	1086	0	0	4	1	1	0.4836	0	0	0.7804	purine ribonucleoside triphosphate binding
32550	1086	0	0	4	1	1	0.4836	0	0	0.7804	purine ribonucleoside binding
1883	1086	0	0	4	1	1	0.4836	0	0	0.7804	purine nucleoside binding
5102	200	0	0	1	1	1	0.485	0	0	0.7766	receptor binding
32549	1089	0	0	4	1	1	0.4858	0	0	0.7725	ribonucleoside binding
1882	1090	0	0	4	1	1	0.4866	0	0	0.7684	nucleoside binding
16746	202	0	0	1	1	1	0.4885	0	0	0.7652	transferase activity, transferring acyl groups
32555	1093	0	0	4	1	1	0.4888	0	0	0.7613	purine ribonucleotide binding
17076	1094	0	0	4	1	1	0.4896	0	0	0.7573	purine nucleotide binding
22857	797	0	0	3	1	1	0.4916	0	0	0.76	transmembrane transporter activity
36094	1399	0	0	5	1	1	0.493	0	0	0.7569	small molecule binding
32553	1109	0	0	4	1	1	0.5007	0	0	0.7562	ribonucleotide binding
42623	212	0	0	1	1	1	0.5054	0	0	0.7591	ATPase activity, coupled
22804	216	0	0	1	1	1	0.512	0	0	0.7582	active transmembrane transporter activity
46873	235	0	0	1	1	1	0.5422	0	0	0.7673	metal ion transmembrane transporter activity
15077	239	0	0	1	1	1	0.5483	0	0	0.7706	monovalent inorganic cation transmembrane transporter activity
16887	259	0	0	1	1	1	0.5778	0	0	0.7882	ATPase activity
15075	585	0	0	2	1	1	0.5799	0	0	0.7872	ion transmembrane transporter activity
98772	268	0	0	1	1	1	0.5904	0	0	0.7896	molecular function regulator
5215	942	0	0	3	1	1	0.6091	0	0	0.7926	transporter activity
4674	299	0	0	1	1	1	0.6313	0	0	0.7908	protein serine/threonine kinase activity
22891	647	0	0	2	1	1	0.6364	0	0	0.7874	substrate-specific transmembrane transporter activity
22890	311	0	0	1	1	1	0.646	0	0	0.7855	inorganic cation transmembrane transporter activity
46872	1671	0	0	5	1	1	0.6625	0	0	0.7945	metal ion binding
43169	1735	0	0	5	1	1	0.6973	0	0	0.8013	cation binding
22892	742	0	0	2	1	1	0.7116	0	0	0.8068	substrate-specific transporter activity
8324	399	0	0	1	1	1	0.7379	0	0	0.8122	cation transmembrane transporter activity
99600	808	0	0	2	1	1	0.7563	0	0	0.8163	transmembrane receptor activity
17111	449	0	0	1	1	1	0.7793	0	0	0.8176	nucleoside-triphosphatase activity
3723	452	0	0	1	1	1	0.7816	0	0	0.8154	RNA binding
43565	459	0	0	1	1	1	0.7868	0	0	0.8161	sequence-specific DNA binding
60089	863	0	0	2	1	1	0.789	0	0	0.8089	molecular transducer activity
4872	863	0	0	2	1	1	0.789	0	0	0.8089	receptor activity
16818	463	0	0	1	1	1	0.7897	0	0	0.803	hydrolase activity, acting on acid anhydrides, in phosphorus-containing anhydrides
16462	463	0	0	1	1	1	0.7897	0	0	0.803	pyrophosphatase activity
16817	466	0	0	1	1	1	0.7919	0	0	0.8008	hydrolase activity, acting on acid anhydrides
3700	498	0	0	1	1	1	0.8137	0	0	0.8024	transcription factor activity, sequence-specific DNA binding
1071	498	0	0	1	1	1	0.8137	0	0	0.8024	nucleic acid binding transcription factor activity
16491	566	0	0	1	1	1	0.853	0	0	0.8139	oxidoreductase activity
4888	739	0	0	1	1	1	0.9203	0	0	0.8309	transmembrane signaling receptor activity
8270	747	0	0	1	1	1	0.9225	0	0	0.8286	zinc ion binding
38023	785	0	0	1	1	1	0.9324	0	0	0.8264	signaling receptor activity
1901363	2913	0	0	6	1	1	0.9493	0	0	0.829	heterocyclic compound binding
97159	2924	0	0	6	1	1	0.9507	0	0	0.8245	organic cyclic compound binding
4871	873	0	0	1	1	1	0.9508	0	0	0.8206	signal transducer activity
46914	892	0	0	1	1	1	0.954	0	0	0.8168	transition metal ion binding
3677	921	0	0	1	1	1	0.9587	0	0	0.8162	DNA binding
3676	1612	0	0	2	1	1	0.9779	0	0	0.8158	nucleic acid binding
2001070	2	0	0	0	1	1	1	0	0	0.965	starch binding
1990939	9	0	0	0	1	1	1	0	0	0.8608	ATP-dependent microtubule motor activity
1990890	1	0	0	0	1	1	1	0	0	0.9859	netrin receptor binding
1990837	122	0	0	0	1	1	1	0	0	0.937	sequence-specific double-stranded DNA binding
1990782	9	0	0	0	1	1	1	0	0	0.8608	protein tyrosine kinase binding
1990749	1	0	0	0	1	1	1	0	0	0.9859	polynucleotide adenylyltransferase activator activity
1990715	1	0	0	0	1	1	1	0	0	0.9859	mRNA CDS binding
1990698	1	0	0	0	1	1	1	0	0	0.9859	palmitoleoyltransferase activity
1990422	2	0	0	0	1	1	1	0	0	0.965	glyoxalase (glycolic acid-forming) activity
1990381	3	0	0	0	1	1	1	0	0	0.9182	ubiquitin-specific protease binding
1990269	1	0	0	0	1	1	1	0	0	0.9859	RNA polymerase II C-terminal domain phosphoserine binding
1990259	2	0	0	0	1	1	1	0	0	0.965	histone-glutamine methyltransferase activity
1990239	3	0	0	0	1	1	1	0	0	0.9182	steroid hormone binding
1990190	1	0	0	0	1	1	1	0	0	0.9859	peptide-glutamate-N-acetyltransferase activity
1990189	1	0	0	0	1	1	1	0	0	0.9859	peptide-serine-N-acetyltransferase activity
1990050	2	0	0	0	1	1	1	0	0	0.965	phosphatidic acid transporter activity
1904264	2	0	0	0	1	1	1	0	0	0.965	ubiquitin protein ligase activity involved in ERAD pathway
1904067	1	0	0	0	1	1	1	0	0	0.9859	ascr#2 binding
1903763	1	0	0	0	1	1	1	0	0	0.9859	gap junction channel activity involved in cell communication by electrical coupling
1903231	1	0	0	0	1	1	1	0	0	0.9859	mRNA binding involved in posttranscriptional gene silencing
1901682	10	0	0	0	1	1	1	0	0	0.9672	sulfur compound transmembrane transporter activity
1901677	11	0	0	0	1	1	1	0	0	0.9967	phosphate transmembrane transporter activity
1901618	18	0	0	0	1	1	1	0	0	0.9392	organic hydroxy compound transmembrane transporter activity
1901505	17	0	0	0	1	1	1	0	0	0.9347	carbohydrate derivative transporter activity
1901476	27	0	0	0	1	1	1	0	0	0.924	carbohydrate transporter activity
1901375	5	0	0	0	1	1	1	0	0	0.9918	acetate ester transmembrane transporter activity
1901338	5	0	0	0	1	1	1	0	0	0.9918	catecholamine binding
1900750	1	0	0	0	1	1	1	0	0	0.9859	oligopeptide binding
99604	2	0	0	0	1	1	1	0	0	0.965	ligand-gated calcium channel activity
99589	4	0	0	0	1	1	1	0	0	0.9902	serotonin receptor activity
99528	10	0	0	0	1	1	1	0	0	0.9672	G-protein coupled neurotransmitter receptor activity
99516	23	0	0	0	1	1	1	0	0	0.9967	ion antiporter activity
98847	4	0	0	0	1	1	1	0	0	0.9902	sequence-specific single stranded DNA binding
98811	6	0	0	0	1	1	1	0	0	0.9943	transcriptional repressor activity, RNA polymerase II activating transcription factor binding
98599	2	0	0	0	1	1	1	0	0	0.965	palmitoyl hydrolase activity
98531	15	0	0	0	1	1	1	0	0	0.998	transcription factor activity, direct ligand regulated sequence-specific DNA binding
98518	2	0	0	0	1	1	1	0	0	0.965	polynucleotide phosphatase activity
98505	1	0	0	0	1	1	1	0	0	0.9859	G-rich strand telomeric DNA binding
97642	1	0	0	0	1	1	1	0	0	0.9859	calcitonin family receptor activity
97617	1	0	0	0	1	1	1	0	0	0.9859	annealing activity
97602	5	0	0	0	1	1	1	0	0	0.9918	cullin family protein binding
97506	1	0	0	0	1	1	1	0	0	0.9859	deaminated base DNA N-glycosylase activity
97472	8	0	0	0	1	1	1	0	0	0.9654	cyclin-dependent protein kinase activity
97200	4	0	0	0	1	1	1	0	0	0.9902	cysteine-type endopeptidase activity involved in execution phase of apoptosis
97157	3	0	0	0	1	1	1	0	0	0.9182	pre-mRNA intronic binding
97153	5	0	0	0	1	1	1	0	0	0.9918	cysteine-type endopeptidase activity involved in apoptotic process
97110	1	0	0	0	1	1	1	0	0	0.9859	scaffold protein binding
97027	1	0	0	0	1	1	1	0	0	0.9859	ubiquitin-protein transferase activator activity
90599	4	0	0	0	1	1	1	0	0	0.9902	alpha-glucosidase activity
90484	4	0	0	0	1	1	1	0	0	0.9902	drug transporter activity
90079	5	0	0	0	1	1	1	0	0	0.9918	translation regulator activity, nucleic acid binding
80146	1	0	0	0	1	1	1	0	0	0.9859	L-cysteine desulfhydrase activity
80132	1	0	0	0	1	1	1	0	0	0.9859	fatty acid alpha-hydroxylase activity
80130	4	0	0	0	1	1	1	0	0	0.9902	L-phenylalanine:2-oxoglutarate aminotransferase activity
80101	1	0	0	0	1	1	1	0	0	0.9859	phosphatidyl-N-dimethylethanolamine N-methyltransferase activity
80048	1	0	0	0	1	1	1	0	0	0.9859	GDP-D-glucose phosphorylase activity
80019	1	0	0	0	1	1	1	0	0	0.9859	fatty-acyl-CoA reductase (alcohol-forming) activity
72542	1	0	0	0	1	1	1	0	0	0.9859	protein phosphatase activator activity
72509	56	0	0	0	1	1	1	0	0	0.9978	divalent inorganic cation transmembrane transporter activity
72349	6	0	0	0	1	1	1	0	0	0.9943	modified amino acid transmembrane transporter activity
72341	14	0	0	0	1	1	1	0	0	0.9383	modified amino acid binding
71987	1	0	0	0	1	1	1	0	0	0.9859	WD40-repeat domain binding
71949	9	0	0	0	1	1	1	0	0	0.8608	FAD binding
71933	1	0	0	0	1	1	1	0	0	0.9859	Arp2/3 complex binding
71885	1	0	0	0	1	1	1	0	0	0.9859	N-terminal protein N-methyltransferase activity
71855	17	0	0	0	1	1	1	0	0	0.9347	neuropeptide receptor binding
71617	3	0	0	0	1	1	1	0	0	0.9182	lysophospholipid acyltransferase activity
71567	1	0	0	0	1	1	1	0	0	0.9859	UFM1 hydrolase activity
71566	1	0	0	0	1	1	1	0	0	0.9859	UFM1 activating enzyme activity
71558	3	0	0	0	1	1	1	0	0	0.9182	histone demethylase activity (H3-K27 specific)
71209	1	0	0	0	1	1	1	0	0	0.9859	U7 snRNA binding
70991	4	0	0	0	1	1	1	0	0	0.9902	medium-chain-acyl-CoA dehydrogenase activity
70883	1	0	0	0	1	1	1	0	0	0.9859	pre-miRNA binding
70878	1	0	0	0	1	1	1	0	0	0.9859	primary miRNA binding
70851	5	0	0	0	1	1	1	0	0	0.9918	growth factor receptor binding
70815	2	0	0	0	1	1	1	0	0	0.965	peptidyl-lysine 5-dioxygenase activity
70733	3	0	0	0	1	1	1	0	0	0.9182	protein adenylyltransferase activity
70717	4	0	0	0	1	1	1	0	0	0.9902	poly-purine tract binding
70700	2	0	0	0	1	1	1	0	0	0.965	BMP receptor binding
70696	2	0	0	0	1	1	1	0	0	0.965	transmembrane receptor protein serine/threonine kinase binding
70626	1	0	0	0	1	1	1	0	0	0.9859	(S)-2-(5-amino-1-(5-phospho-D-ribosyl)imidazole-4-carboxamido)succinate AMP-lyase (fumarate-forming) activity
70577	1	0	0	0	1	1	1	0	0	0.9859	lysine-acetylated histone binding
70569	7	0	0	0	1	1	1	0	0	1	uridylyltransferase activity
70568	2	0	0	0	1	1	1	0	0	0.965	guanylyltransferase activity
70567	3	0	0	0	1	1	1	0	0	0.9182	cytidylyltransferase activity
70566	16	0	0	0	1	1	1	0	0	0.9965	adenylyltransferase activity
70551	3	0	0	0	1	1	1	0	0	0.9182	endoribonuclease activity, cleaving siRNA-paired mRNA
70548	2	0	0	0	1	1	1	0	0	0.965	L-glutamine aminotransferase activity
70547	1	0	0	0	1	1	1	0	0	0.9859	L-tyrosine aminotransferase activity
70546	4	0	0	0	1	1	1	0	0	0.9902	L-phenylalanine aminotransferase activity
70538	1	0	0	0	1	1	1	0	0	0.9859	oleic acid binding
70530	1	0	0	0	1	1	1	0	0	0.9859	K63-linked polyubiquitin binding
70513	3	0	0	0	1	1	1	0	0	0.9182	death domain binding
70491	4	0	0	0	1	1	1	0	0	0.9902	repressing transcription factor binding
70405	56	0	0	0	1	1	1	0	0	0.9978	ammonium ion binding
70403	7	0	0	0	1	1	1	0	0	1	NAD+ binding
70361	3	0	0	0	1	1	1	0	0	0.9182	mitochondrial light strand promoter anti-sense binding
70325	1	0	0	0	1	1	1	0	0	0.9859	lipoprotein particle receptor binding
70300	1	0	0	0	1	1	1	0	0	0.9859	phosphatidic acid binding
70290	3	0	0	0	1	1	1	0	0	0.9182	N-acylphosphatidylethanolamine-specific phospholipase D activity
70283	1	0	0	0	1	1	1	0	0	0.9859	radical SAM enzyme activity
70259	1	0	0	0	1	1	1	0	0	0.9859	tyrosyl-DNA phosphodiesterase activity
70182	2	0	0	0	1	1	1	0	0	0.965	DNA polymerase binding
70181	5	0	0	0	1	1	1	0	0	0.9918	small ribosomal subunit rRNA binding
70180	1	0	0	0	1	1	1	0	0	0.9859	large ribosomal subunit rRNA binding
70097	1	0	0	0	1	1	1	0	0	0.9859	delta-catenin binding
70063	4	0	0	0	1	1	1	0	0	0.9902	RNA polymerase binding
70039	1	0	0	0	1	1	1	0	0	0.9859	rRNA (guanosine-2'-O-)-methyltransferase activity
70037	1	0	0	0	1	1	1	0	0	0.9859	rRNA (pseudouridine) methyltransferase activity
70035	66	0	0	0	1	1	1	0	0	0.9215	purine NTP-dependent helicase activity
70027	1	0	0	0	1	1	1	0	0	0.9859	carbon monoxide sensor activity
70026	3	0	0	0	1	1	1	0	0	0.9182	nitric oxide binding
70025	3	0	0	0	1	1	1	0	0	0.9182	carbon monoxide binding
70016	2	0	0	0	1	1	1	0	0	0.965	armadillo repeat domain binding
70006	15	0	0	0	1	1	1	0	0	0.998	metalloaminopeptidase activity
70003	14	0	0	0	1	1	1	0	0	0.9383	threonine-type peptidase activity
70001	25	0	0	0	1	1	1	0	0	0.9898	aspartic-type peptidase activity
61733	19	0	0	0	1	1	1	0	0	0.9997	peptide-lysine-N-acetyltransferase activity
61731	5	0	0	0	1	1	1	0	0	0.9918	ribonucleoside-diphosphate reductase activity
61730	1	0	0	0	1	1	1	0	0	0.9859	C-rich strand telomeric DNA binding
61712	1	0	0	0	1	1	1	0	0	0.9859	tRNA (N(6)-L-threonylcarbamoyladenosine(37)-C(2))-methylthiotransferase
61711	1	0	0	0	1	1	1	0	0	0.9859	N(6)-L-threonylcarbamoyladenine synthase
61665	1	0	0	0	1	1	1	0	0	0.9859	SUMO ligase activity
61659	70	0	0	0	1	1	1	0	0	0.9314	ubiquitin-like protein ligase activity
61656	1	0	0	0	1	1	1	0	0	0.9859	SUMO conjugating enzyme activity
61650	5	0	0	0	1	1	1	0	0	0.9918	ubiquitin-like protein conjugating enzyme activity
61631	4	0	0	0	1	1	1	0	0	0.9902	ubiquitin conjugating enzyme activity
61630	69	0	0	0	1	1	1	0	0	0.9941	ubiquitin protein ligase activity
61605	1	0	0	0	1	1	1	0	0	0.9859	molybdopterin-synthase adenylyltransferase activity
61604	1	0	0	0	1	1	1	0	0	0.9859	molybdopterin-synthase sulfurtransferase activity
61599	2	0	0	0	1	1	1	0	0	0.965	molybdopterin molybdotransferase activity
61598	2	0	0	0	1	1	1	0	0	0.965	molybdopterin adenylyltransferase activity
61597	2	0	0	0	1	1	1	0	0	0.965	cyclic pyranopterin monophosphate synthase activity
61505	4	0	0	0	1	1	1	0	0	0.9902	DNA topoisomerase II activity
61503	1	0	0	0	1	1	1	0	0	0.9859	tRNA threonylcarbamoyladenosine dehydratase
61135	60	0	0	0	1	1	1	0	0	0.9964	endopeptidase regulator activity
61134	69	0	0	0	1	1	1	0	0	0.9941	peptidase regulator activity
61133	3	0	0	0	1	1	1	0	0	0.9182	endopeptidase activator activity
60590	5	0	0	0	1	1	1	0	0	0.9918	ATPase regulator activity
60589	63	0	0	0	1	1	1	0	0	0.9861	nucleoside-triphosphatase regulator activity
60090	13	0	0	0	1	1	1	0	0	0.9994	binding, bridging
60072	1	0	0	0	1	1	1	0	0	0.9859	large conductance calcium-activated potassium channel activity
60002	1	0	0	0	1	1	1	0	0	0.9859	plus-end directed microfilament motor activity
55106	1	0	0	0	1	1	1	0	0	0.9859	ubiquitin-protein transferase regulator activity
55103	1	0	0	0	1	1	1	0	0	0.9859	ligase regulator activity
55077	16	0	0	0	1	1	1	0	0	0.9965	gap junction hemi-channel activity
52917	1	0	0	0	1	1	1	0	0	0.9859	dol-P-Man:Man(7)GlcNAc(2)-PP-Dol alpha-1,6-mannosyltransferase activity
52909	1	0	0	0	1	1	1	0	0	0.9859	18S rRNA (adenine(1779)-N(6)/adenine(1780)-N(6))-dimethyltransferase activity
52907	1	0	0	0	1	1	1	0	0	0.9859	23S rRNA (adenine(1618)-N(6))-methyltransferase activity
52906	1	0	0	0	1	1	1	0	0	0.9859	tRNA (guanine(37)-N(1))-methyltransferase activity
52890	24	0	0	0	1	1	1	0	0	0.9952	oxidoreductase activity, acting on the CH-CH group of donors, with a flavin as acceptor
52866	7	0	0	0	1	1	1	0	0	1	phosphatidylinositol phosphate phosphatase activity
52857	1	0	0	0	1	1	1	0	0	0.9859	NADPHX epimerase activity
52856	1	0	0	0	1	1	1	0	0	0.9859	NADHX epimerase activity
52855	1	0	0	0	1	1	1	0	0	0.9859	ADP-dependent NAD(P)H-hydrate dehydratase activity
52834	1	0	0	0	1	1	1	0	0	0.9859	inositol monophosphate phosphatase activity
52833	1	0	0	0	1	1	1	0	0	0.9859	inositol monophosphate 4-phosphatase activity
52832	1	0	0	0	1	1	1	0	0	0.9859	inositol monophosphate 3-phosphatase activity
52745	3	0	0	0	1	1	1	0	0	0.9182	inositol phosphate phosphatase activity
52744	3	0	0	0	1	1	1	0	0	0.9182	phosphatidylinositol monophosphate phosphatase activity
52743	1	0	0	0	1	1	1	0	0	0.9859	inositol tetrakisphosphate phosphatase activity
52742	8	0	0	0	1	1	1	0	0	0.9654	phosphatidylinositol kinase activity
52724	1	0	0	0	1	1	1	0	0	0.9859	inositol hexakisphosphate 3-kinase activity
52723	1	0	0	0	1	1	1	0	0	0.9859	inositol hexakisphosphate 1-kinase activity
52717	1	0	0	0	1	1	1	0	0	0.9859	tRNA-specific adenosine-34 deaminase activity
52689	82	0	0	0	1	1	1	0	0	0.9227	carboxylic ester hydrolase activity
52659	1	0	0	0	1	1	1	0	0	0.9859	inositol-1,3,4,5-tetrakisphosphate 5-phosphatase activity
52658	1	0	0	0	1	1	1	0	0	0.9859	inositol-1,4,5-trisphosphate 5-phosphatase activity
52656	2	0	0	0	1	1	1	0	0	0.965	L-isoleucine transaminase activity
52655	2	0	0	0	1	1	1	0	0	0.965	L-valine transaminase activity
52654	2	0	0	0	1	1	1	0	0	0.965	L-leucine transaminase activity
52629	2	0	0	0	1	1	1	0	0	0.965	phosphatidylinositol-3,5-bisphosphate 3-phosphatase activity
52591	2	0	0	0	1	1	1	0	0	0.965	sn-glycerol-3-phosphate:ubiquinone-8 oxidoreductase activity
52590	2	0	0	0	1	1	1	0	0	0.965	sn-glycerol-3-phosphate:ubiquinone oxidoreductase activity
52381	1	0	0	0	1	1	1	0	0	0.9859	tRNA dimethylallyltransferase activity
51998	5	0	0	0	1	1	1	0	0	0.9918	protein carboxyl O-methyltransferase activity
51959	2	0	0	0	1	1	1	0	0	0.965	dynein light intermediate chain binding
51920	3	0	0	0	1	1	1	0	0	0.9182	peroxiredoxin activity
51903	1	0	0	0	1	1	1	0	0	0.9859	S-(hydroxymethyl)glutathione dehydrogenase activity
51879	3	0	0	0	1	1	1	0	0	0.9182	Hsp90 protein binding
51864	3	0	0	0	1	1	1	0	0	0.9182	histone demethylase activity (H3-K36 specific)
51861	6	0	0	0	1	1	1	0	0	0.9943	glycolipid binding
51787	2	0	0	0	1	1	1	0	0	0.965	misfolded protein binding
51766	5	0	0	0	1	1	1	0	0	0.9918	inositol trisphosphate kinase activity
51748	2	0	0	0	1	1	1	0	0	0.965	UTP-monosaccharide-1-phosphate uridylyltransferase activity
51736	1	0	0	0	1	1	1	0	0	0.9859	ATP-dependent polyribonucleotide 5'-hydroxyl-kinase activity
51734	2	0	0	0	1	1	1	0	0	0.965	ATP-dependent polynucleotide kinase activity
51733	1	0	0	0	1	1	1	0	0	0.9859	polydeoxyribonucleotide kinase activity
51732	1	0	0	0	1	1	1	0	0	0.9859	polyribonucleotide kinase activity
51731	3	0	0	0	1	1	1	0	0	0.9182	polynucleotide 5'-hydroxyl-kinase activity
51723	1	0	0	0	1	1	1	0	0	0.9859	protein methylesterase activity
51722	1	0	0	0	1	1	1	0	0	0.9859	protein C-terminal methylesterase activity
51721	6	0	0	0	1	1	1	0	0	0.9943	protein phosphatase 2A binding
51540	42	0	0	0	1	1	1	0	0	0.9939	metal cluster binding
51539	24	0	0	0	1	1	1	0	0	0.9952	4 iron, 4 sulfur cluster binding
51538	1	0	0	0	1	1	1	0	0	0.9859	3 iron, 4 sulfur cluster binding
51537	17	0	0	0	1	1	1	0	0	0.9347	2 iron, 2 sulfur cluster binding
51536	42	0	0	0	1	1	1	0	0	0.9939	iron-sulfur cluster binding
51500	1	0	0	0	1	1	1	0	0	0.9859	D-tyrosyl-tRNA(Tyr) deacylase activity
51499	1	0	0	0	1	1	1	0	0	0.9859	D-aminoacyl-tRNA deacylase activity
51434	1	0	0	0	1	1	1	0	0	0.9859	BH3 domain binding
51432	1	0	0	0	1	1	1	0	0	0.9859	BH1 domain binding
51427	2	0	0	0	1	1	1	0	0	0.965	hormone receptor binding
51425	1	0	0	0	1	1	1	0	0	0.9859	PTB domain binding
51400	2	0	0	0	1	1	1	0	0	0.965	BH domain binding
51380	1	0	0	0	1	1	1	0	0	0.9859	norepinephrine binding
51379	1	0	0	0	1	1	1	0	0	0.9859	epinephrine binding
51378	1	0	0	0	1	1	1	0	0	0.9859	serotonin binding
51377	3	0	0	0	1	1	1	0	0	0.9182	mannose-ethanolamine phosphotransferase activity
51287	27	0	0	0	1	1	1	0	0	0.924	NAD binding
51267	1	0	0	0	1	1	1	0	0	0.9859	CP2 mannose-ethanolamine phosphotransferase activity
51219	2	0	0	0	1	1	1	0	0	0.965	phosphoprotein binding
51213	33	0	0	0	1	1	1	0	0	0.9966	dioxygenase activity
51185	1	0	0	0	1	1	1	0	0	0.9859	coenzyme transporter activity
51184	6	0	0	0	1	1	1	0	0	0.9943	cofactor transporter activity
51183	2	0	0	0	1	1	1	0	0	0.965	vitamin transporter activity
51119	18	0	0	0	1	1	1	0	0	0.9392	sugar transmembrane transporter activity
51117	11	0	0	0	1	1	1	0	0	0.9967	ATPase binding
51087	17	0	0	0	1	1	1	0	0	0.9347	chaperone binding
51082	36	0	0	0	1	1	1	0	0	0.9973	unfolded protein binding
51033	7	0	0	0	1	1	1	0	0	1	RNA transmembrane transporter activity
51032	7	0	0	0	1	1	1	0	0	1	nucleic acid transmembrane transporter activity
51019	3	0	0	0	1	1	1	0	0	0.9182	mitogen-activated protein kinase binding
50997	50	0	0	0	1	1	1	0	0	0.997	quaternary ammonium group binding
50840	3	0	0	0	1	1	1	0	0	0.9182	extracellular matrix binding
50839	13	0	0	0	1	1	1	0	0	0.9994	cell adhesion molecule binding
50815	1	0	0	0	1	1	1	0	0	0.9859	phosphoserine binding
50780	2	0	0	0	1	1	1	0	0	0.965	dopamine receptor binding
50750	1	0	0	0	1	1	1	0	0	0.9859	low-density lipoprotein particle receptor binding
50664	4	0	0	0	1	1	1	0	0	0.9902	oxidoreductase activity, acting on NAD(P)H, oxygen as acceptor
50661	19	0	0	0	1	1	1	0	0	0.9997	NADP binding
50660	64	0	0	0	1	1	1	0	0	0.9982	flavin adenine dinucleotide binding
50610	2	0	0	0	1	1	1	0	0	0.965	methylarsonate reductase activity
50577	1	0	0	0	1	1	1	0	0	0.9859	GDP-L-fucose synthase activity
50567	2	0	0	0	1	1	1	0	0	0.965	glutaminyl-tRNA synthase (glutamine-hydrolyzing) activity
50510	2	0	0	0	1	1	1	0	0	0.965	N-acetylgalactosaminyl-proteoglycan 3-beta-glucuronosyltransferase activity
50508	1	0	0	0	1	1	1	0	0	0.9859	glucuronosyl-N-acetylglucosaminyl-proteoglycan 4-alpha-N-acetylglucosaminyltransferase activity
50497	2	0	0	0	1	1	1	0	0	0.965	transferase activity, transferring alkylthio groups
50479	1	0	0	0	1	1	1	0	0	0.9859	glyceryl-ether monooxygenase activity
50353	1	0	0	0	1	1	1	0	0	0.9859	trimethyllysine dioxygenase activity
50321	2	0	0	0	1	1	1	0	0	0.965	tau-protein kinase activity
50308	2	0	0	0	1	1	1	0	0	0.965	sugar-phosphatase activity
50291	3	0	0	0	1	1	1	0	0	0.9182	sphingosine N-acyltransferase activity
50290	1	0	0	0	1	1	1	0	0	0.9859	sphingomyelin phosphodiesterase D activity
50278	2	0	0	0	1	1	1	0	0	0.965	sedoheptulose-bisphosphatase activity
50277	1	0	0	0	1	1	1	0	0	0.9859	sedoheptulokinase activity
50265	3	0	0	0	1	1	1	0	0	0.9182	RNA uridylyltransferase activity
50136	20	0	0	0	1	1	1	0	0	0.9971	NADH dehydrogenase (quinone) activity
50113	1	0	0	0	1	1	1	0	0	0.9859	inositol oxygenase activity
50080	1	0	0	0	1	1	1	0	0	0.9859	malonyl-CoA decarboxylase activity
50072	3	0	0	0	1	1	1	0	0	0.9182	m7G(5')pppN diphosphatase activity
50062	1	0	0	0	1	1	1	0	0	0.9859	long-chain-fatty-acyl-CoA reductase activity
50038	1	0	0	0	1	1	1	0	0	0.9859	L-xylulose reductase (NADP+) activity
50031	1	0	0	0	1	1	1	0	0	0.9859	L-pipecolate oxidase activity
50017	1	0	0	0	1	1	1	0	0	0.9859	L-3-cyanoalanine synthase activity
48531	11	0	0	0	1	1	1	0	0	0.9967	beta-1,3-galactosyltransferase activity
48487	2	0	0	0	1	1	1	0	0	0.965	beta-tubulin binding
48365	10	0	0	0	1	1	1	0	0	0.9672	Rac GTPase binding
48257	2	0	0	0	1	1	1	0	0	0.965	3'-flap endonuclease activity
48256	3	0	0	0	1	1	1	0	0	0.9182	flap endonuclease activity
48244	3	0	0	0	1	1	1	0	0	0.9182	phytanoyl-CoA dioxygenase activity
48156	1	0	0	0	1	1	1	0	0	0.9859	tau protein binding
48040	1	0	0	0	1	1	1	0	0	0.9859	UDP-glucuronate decarboxylase activity
48039	2	0	0	0	1	1	1	0	0	0.965	ubiquinone binding
48038	6	0	0	0	1	1	1	0	0	0.9943	quinone binding
48029	15	0	0	0	1	1	1	0	0	0.998	monosaccharide binding
48027	3	0	0	0	1	1	1	0	0	0.9182	mRNA 5'-UTR binding
47994	1	0	0	0	1	1	1	0	0	0.9859	hydroxymethylglutaryl-CoA hydrolase activity
47988	1	0	0	0	1	1	1	0	0	0.9859	hydroxyacid-oxoacid transhydrogenase activity
47961	2	0	0	0	1	1	1	0	0	0.965	glycine N-acyltransferase activity
47844	2	0	0	0	1	1	1	0	0	0.965	deoxycytidine deaminase activity
47821	2	0	0	0	1	1	1	0	0	0.965	D-glutamate oxidase activity
47749	1	0	0	0	1	1	1	0	0	0.9859	cholestanetriol 26-monooxygenase activity
47710	1	0	0	0	1	1	1	0	0	0.9859	bis(5'-adenosyl)-triphosphatase activity
47627	1	0	0	0	1	1	1	0	0	0.9859	adenylylsulfatase activity
47623	1	0	0	0	1	1	1	0	0	0.9859	adenosine-phosphate deaminase activity
47617	6	0	0	0	1	1	1	0	0	0.9943	acyl-CoA hydrolase activity
47555	1	0	0	0	1	1	1	0	0	0.9859	3',5'-cyclic-GMP phosphodiesterase activity
47545	1	0	0	0	1	1	1	0	0	0.9859	2-hydroxyglutarate dehydrogenase activity
47499	1	0	0	0	1	1	1	0	0	0.9859	calcium-independent phospholipase A2 activity
47493	3	0	0	0	1	1	1	0	0	0.9182	ceramide cholinephosphotransferase activity
47485	4	0	0	0	1	1	1	0	0	0.9902	protein N-terminus binding
47464	1	0	0	0	1	1	1	0	0	0.9859	heparosan-N-sulfate-glucuronate 5-epimerase activity
47453	1	0	0	0	1	1	1	0	0	0.9859	ATP-dependent NAD(P)H-hydrate dehydratase activity
47429	2	0	0	0	1	1	1	0	0	0.965	nucleoside-triphosphate diphosphatase activity
47389	2	0	0	0	1	1	1	0	0	0.965	glycerophosphocholine phosphodiesterase activity
47298	1	0	0	0	1	1	1	0	0	0.9859	(S)-3-amino-2-methylpropionate transaminase activity
47293	1	0	0	0	1	1	1	0	0	0.9859	4-hydroxybenzoate nonaprenyltransferase activity
47238	2	0	0	0	1	1	1	0	0	0.965	glucuronosyl-N-acetylgalactosaminyl-proteoglycan 4-beta-N-acetylgalactosaminyltransferase activity
47237	1	0	0	0	1	1	1	0	0	0.9859	glucuronylgalactosylproteoglycan 4-beta-N-acetylgalactosaminyltransferase activity
47220	1	0	0	0	1	1	1	0	0	0.9859	galactosylxylosylprotein 3-beta-galactosyltransferase activity
47184	1	0	0	0	1	1	1	0	0	0.9859	1-acylglycerophosphocholine O-acyltransferase activity
47134	2	0	0	0	1	1	1	0	0	0.965	protein-disulfide reductase activity
47105	3	0	0	0	1	1	1	0	0	0.9182	4-trimethylammoniobutyraldehyde dehydrogenase activity
47066	1	0	0	0	1	1	1	0	0	0.9859	phospholipid-hydroperoxide glutathione peroxidase activity
46982	101	0	0	0	1	1	1	0	0	0.9918	protein heterodimerization activity
46975	2	0	0	0	1	1	1	0	0	0.965	histone methyltransferase activity (H3-K36 specific)
46974	1	0	0	0	1	1	1	0	0	0.9859	histone methyltransferase activity (H3-K9 specific)
46964	2	0	0	0	1	1	1	0	0	0.965	3'-phosphoadenosine 5'-phosphosulfate transmembrane transporter activity
46961	22	0	0	0	1	1	1	0	0	0.9261	proton-transporting ATPase activity, rotational mechanism
46943	65	0	0	0	1	1	1	0	0	0.9672	carboxylic acid transmembrane transporter activity
46935	1	0	0	0	1	1	1	0	0	0.9859	1-phosphatidylinositol-3-kinase regulator activity
46933	12	0	0	0	1	1	1	0	0	0.9975	proton-transporting ATP synthase activity, rotational mechanism
46923	2	0	0	0	1	1	1	0	0	0.965	ER retention sequence binding
46922	2	0	0	0	1	1	1	0	0	0.965	peptide-O-fucosyltransferase activity
46921	1	0	0	0	1	1	1	0	0	0.9859	alpha-(1->6)-fucosyltransferase activity
46920	1	0	0	0	1	1	1	0	0	0.9859	alpha-(1->3)-fucosyltransferase activity
46915	42	0	0	0	1	1	1	0	0	0.9939	transition metal ion transmembrane transporter activity
46912	5	0	0	0	1	1	1	0	0	0.9918	transferase activity, transferring acyl groups, acyl groups converted into alkyl on transfer
46906	155	0	0	0	1	1	1	0	0	0.9674	tetrapyrrole binding
46875	5	0	0	0	1	1	1	0	0	0.9918	ephrin receptor binding
46624	4	0	0	0	1	1	1	0	0	0.9902	sphingolipid transporter activity
46570	1	0	0	0	1	1	1	0	0	0.9859	methylthioribulose 1-phosphate dehydratase activity
46527	14	0	0	0	1	1	1	0	0	0.9383	glucosyltransferase activity
46523	4	0	0	0	1	1	1	0	0	0.9902	S-methyl-5-thioribose-1-phosphate isomerase activity
46404	1	0	0	0	1	1	1	0	0	0.9859	ATP-dependent polydeoxyribonucleotide 5'-hydroxyl-kinase activity
46403	1	0	0	0	1	1	1	0	0	0.9859	polynucleotide 3'-phosphatase activity
46332	3	0	0	0	1	1	1	0	0	0.9182	SMAD binding
46030	1	0	0	0	1	1	1	0	0	0.9859	inositol trisphosphate phosphatase activity
45735	6	0	0	0	1	1	1	0	0	0.9943	nutrient reservoir activity
45545	1	0	0	0	1	1	1	0	0	0.9859	syndecan binding
45505	1	0	0	0	1	1	1	0	0	0.9859	dynein intermediate chain binding
45504	1	0	0	0	1	1	1	0	0	0.9859	dynein heavy chain binding
45503	1	0	0	0	1	1	1	0	0	0.9859	dynein light chain binding
45502	6	0	0	0	1	1	1	0	0	0.9943	dynein binding
45499	4	0	0	0	1	1	1	0	0	0.9902	chemorepellent activity
45309	2	0	0	0	1	1	1	0	0	0.965	protein phosphorylated amino acid binding
45296	5	0	0	0	1	1	1	0	0	0.9918	cadherin binding
45295	1	0	0	0	1	1	1	0	0	0.9859	gamma-catenin binding
45294	2	0	0	0	1	1	1	0	0	0.965	alpha-catenin binding
45182	8	0	0	0	1	1	1	0	0	0.9654	translation regulator activity
45181	1	0	0	0	1	1	1	0	0	0.9859	glutamate synthase activity, NAD(P)H as acceptor
45174	2	0	0	0	1	1	1	0	0	0.965	glutathione dehydrogenase (ascorbate) activity
45159	1	0	0	0	1	1	1	0	0	0.9859	myosin II binding
45134	5	0	0	0	1	1	1	0	0	0.9918	uridine-diphosphatase activity
45131	1	0	0	0	1	1	1	0	0	0.9859	pre-mRNA branch point binding
44822	80	0	0	0	1	1	1	0	0	0.9903	poly(A) RNA binding
44769	26	0	0	0	1	1	1	0	0	0.9879	ATPase activity, coupled to transmembrane movement of ions, rotational mechanism
44748	1	0	0	0	1	1	1	0	0	0.9859	3'-5'-exoribonuclease activity involved in mature miRNA 3'-end processing
44736	1	0	0	0	1	1	1	0	0	0.9859	acid-sensing ion channel activity
44540	1	0	0	0	1	1	1	0	0	0.9859	L-cystine L-cysteine-lyase (deaminating)
44390	18	0	0	0	1	1	1	0	0	0.9392	ubiquitin-like protein conjugating enzyme binding
44389	37	0	0	0	1	1	1	0	0	0.9876	ubiquitin-like protein ligase binding
44325	2	0	0	0	1	1	1	0	0	0.965	ion channel binding
44213	2	0	0	0	1	1	1	0	0	0.965	intronic transcription regulatory region DNA binding
44212	134	0	0	0	1	1	1	0	0	0.9969	transcription regulatory region DNA binding
44020	1	0	0	0	1	1	1	0	0	0.9859	histone methyltransferase activity (H4-R3 specific)
43891	4	0	0	0	1	1	1	0	0	0.9902	glyceraldehyde-3-phosphate dehydrogenase (NAD(P)+) (phosphorylating) activity
43874	1	0	0	0	1	1	1	0	0	0.9859	acireductone synthase activity
43855	6	0	0	0	1	1	1	0	0	0.9943	cyclic nucleotide-gated ion channel activity
43843	1	0	0	0	1	1	1	0	0	0.9859	ADP-specific glucokinase activity
43813	1	0	0	0	1	1	1	0	0	0.9859	phosphatidylinositol-3,5-bisphosphate 5-phosphatase activity
43754	1	0	0	0	1	1	1	0	0	0.9859	dihydrolipoyllysine-residue (2-methylpropanoyl)transferase activity
43682	1	0	0	0	1	1	1	0	0	0.9859	copper-transporting ATPase activity
43621	14	0	0	0	1	1	1	0	0	0.9383	protein self-association
43566	7	0	0	0	1	1	1	0	0	1	structure-specific DNA binding
43539	3	0	0	0	1	1	1	0	0	0.9182	protein serine/threonine kinase activator activity
43531	1	0	0	0	1	1	1	0	0	0.9859	ADP binding
43495	3	0	0	0	1	1	1	0	0	0.9182	protein anchor
43425	1	0	0	0	1	1	1	0	0	0.9859	bHLH transcription factor binding
43395	5	0	0	0	1	1	1	0	0	0.9918	heparan sulfate proteoglycan binding
43394	5	0	0	0	1	1	1	0	0	0.9918	proteoglycan binding
43295	1	0	0	0	1	1	1	0	0	0.9859	glutathione binding
43274	1	0	0	0	1	1	1	0	0	0.9859	phospholipase binding
43273	1	0	0	0	1	1	1	0	0	0.9859	CTPase activity
43262	1	0	0	0	1	1	1	0	0	0.9859	adenosine-diphosphatase activity
43236	3	0	0	0	1	1	1	0	0	0.9182	laminin binding
43178	7	0	0	0	1	1	1	0	0	1	alcohol binding
43177	32	0	0	0	1	1	1	0	0	0.9258	organic acid binding
43176	1	0	0	0	1	1	1	0	0	0.9859	amine binding
43175	3	0	0	0	1	1	1	0	0	0.9182	RNA polymerase core enzyme binding
43142	2	0	0	0	1	1	1	0	0	0.965	single-stranded DNA-dependent ATPase activity
43141	4	0	0	0	1	1	1	0	0	0.9902	ATP-dependent 5'-3' DNA helicase activity
43140	2	0	0	0	1	1	1	0	0	0.965	ATP-dependent 3'-5' DNA helicase activity
43139	5	0	0	0	1	1	1	0	0	0.9918	5'-3' DNA helicase activity
43138	6	0	0	0	1	1	1	0	0	0.9943	3'-5' DNA helicase activity
43135	1	0	0	0	1	1	1	0	0	0.9859	5-phosphoribosyl 1-pyrophosphate pyrophosphatase activity
43130	19	0	0	0	1	1	1	0	0	0.9997	ubiquitin binding
43047	4	0	0	0	1	1	1	0	0	0.9902	single-stranded telomeric DNA binding
43028	2	0	0	0	1	1	1	0	0	0.965	cysteine-type endopeptidase regulator activity involved in apoptotic process
43023	4	0	0	0	1	1	1	0	0	0.9902	ribosomal large subunit binding
43022	13	0	0	0	1	1	1	0	0	0.9994	ribosome binding
43021	24	0	0	0	1	1	1	0	0	0.9952	ribonucleoprotein complex binding
43014	1	0	0	0	1	1	1	0	0	0.9859	alpha-tubulin binding
42979	1	0	0	0	1	1	1	0	0	0.9859	ornithine decarboxylase regulator activity
42936	2	0	0	0	1	1	1	0	0	0.965	dipeptide transporter activity
42923	3	0	0	0	1	1	1	0	0	0.9182	neuropeptide binding
42910	2	0	0	0	1	1	1	0	0	0.965	xenobiotic transporter activity
42895	1	0	0	0	1	1	1	0	0	0.9859	antibiotic transporter activity
42887	6	0	0	0	1	1	1	0	0	0.9943	amide transmembrane transporter activity
42826	4	0	0	0	1	1	1	0	0	0.9902	histone deacetylase binding
42813	5	0	0	0	1	1	1	0	0	0.9918	Wnt-activated receptor activity
42800	8	0	0	0	1	1	1	0	0	0.9654	histone methyltransferase activity (H3-K4 specific)
42625	42	0	0	0	1	1	1	0	0	0.9939	ATPase coupled ion transmembrane transporter activity
42577	4	0	0	0	1	1	1	0	0	0.9902	lipid phosphatase activity
42562	6	0	0	0	1	1	1	0	0	0.9943	hormone binding
42500	1	0	0	0	1	1	1	0	0	0.9859	aspartic endopeptidase activity, intramembrane cleaving
42393	12	0	0	0	1	1	1	0	0	0.9975	histone binding
42389	1	0	0	0	1	1	1	0	0	0.9859	omega-3 fatty acid desaturase activity
42329	9	0	0	0	1	1	1	0	0	0.8608	structural constituent of collagen and cuticulin-based cuticle
42328	1	0	0	0	1	1	1	0	0	0.9859	heparan sulfate N-acetylglucosaminyltransferase activity
42302	169	0	0	0	1	1	1	0	0	0.9352	structural constituent of cuticle
42292	2	0	0	0	1	1	1	0	0	0.965	URM1 activating enzyme activity
42285	1	0	0	0	1	1	1	0	0	0.9859	xylosyltransferase activity
42284	2	0	0	0	1	1	1	0	0	0.965	sphingolipid delta-4 desaturase activity
42281	2	0	0	0	1	1	1	0	0	0.965	dolichyl pyrophosphate Man9GlcNAc2 alpha-1,3-glucosyltransferase activity
42277	41	0	0	0	1	1	1	0	0	0.9965	peptide binding
42171	3	0	0	0	1	1	1	0	0	0.9182	lysophosphatidic acid acyltransferase activity
42169	2	0	0	0	1	1	1	0	0	0.965	SH2 domain binding
42166	50	0	0	0	1	1	1	0	0	0.997	acetylcholine binding
42165	51	0	0	0	1	1	1	0	0	0.9901	neurotransmitter binding
42162	9	0	0	0	1	1	1	0	0	0.8608	telomeric DNA binding
42134	2	0	0	0	1	1	1	0	0	0.965	rRNA primary transcript binding
42132	1	0	0	0	1	1	1	0	0	0.9859	fructose 1,6-bisphosphate 1-phosphatase activity
42084	1	0	0	0	1	1	1	0	0	0.9859	5-methyltetrahydrofolate-dependent methyltransferase activity
42083	1	0	0	0	1	1	1	0	0	0.9859	5,10-methylenetetrahydrofolate-dependent methyltransferase activity
42054	31	0	0	0	1	1	1	0	0	1	histone methyltransferase activity
42030	3	0	0	0	1	1	1	0	0	0.9182	ATPase inhibitor activity
38024	4	0	0	0	1	1	1	0	0	0.9902	cargo receptor activity
38022	264	0	0	0	1	1	1	0	0	0.9334	G-protein coupled olfactory receptor activity
36468	1	0	0	0	1	1	1	0	0	0.9859	L-dopa decarboxylase activity
36455	1	0	0	0	1	1	1	0	0	0.9859	iron-sulfur transferase activity
36442	23	0	0	0	1	1	1	0	0	0.9967	hydrogen-exporting ATPase activity
36440	1	0	0	0	1	1	1	0	0	0.9859	citrate synthase activity
36402	8	0	0	0	1	1	1	0	0	0.9654	proteasome-activating ATPase activity
36310	1	0	0	0	1	1	1	0	0	0.9859	annealing helicase activity
36122	2	0	0	0	1	1	1	0	0	0.965	BMP binding
36041	1	0	0	0	1	1	1	0	0	0.9859	long-chain fatty acid binding
36009	2	0	0	0	1	1	1	0	0	0.965	protein-glutamine N-methyltransferase activity
36002	10	0	0	0	1	1	1	0	0	0.9672	pre-mRNA binding
35614	2	0	0	0	1	1	1	0	0	0.965	snRNA stem-loop binding
35613	2	0	0	0	1	1	1	0	0	0.965	RNA stem-loop binding
35598	1	0	0	0	1	1	1	0	0	0.9859	N6-threonylcarbomyladenosine methylthiotransferase activity
35596	2	0	0	0	1	1	1	0	0	0.965	methylthiotransferase activity
35591	5	0	0	0	1	1	1	0	0	0.9918	signaling adaptor activity
35516	1	0	0	0	1	1	1	0	0	0.9859	oxidative DNA demethylase activity
35514	1	0	0	0	1	1	1	0	0	0.9859	DNA demethylase activity
35326	4	0	0	0	1	1	1	0	0	0.9902	enhancer binding
35312	4	0	0	0	1	1	1	0	0	0.9902	5'-3' exodeoxyribonuclease activity
35299	1	0	0	0	1	1	1	0	0	0.9859	inositol pentakisphosphate 2-kinase activity
35257	2	0	0	0	1	1	1	0	0	0.965	nuclear hormone receptor binding
35255	3	0	0	0	1	1	1	0	0	0.9182	ionotropic glutamate receptor binding
35254	4	0	0	0	1	1	1	0	0	0.9902	glutamate receptor binding
35252	1	0	0	0	1	1	1	0	0	0.9859	UDP-xylosyltransferase activity
35251	11	0	0	0	1	1	1	0	0	0.9967	UDP-glucosyltransferase activity
35250	2	0	0	0	1	1	1	0	0	0.965	UDP-galactosyltransferase activity
35242	2	0	0	0	1	1	1	0	0	0.965	protein-arginine omega-N asymmetric methyltransferase activity
35241	1	0	0	0	1	1	1	0	0	0.9859	protein-arginine omega-N monomethyltransferase activity
35240	5	0	0	0	1	1	1	0	0	0.9918	dopamine binding
35198	2	0	0	0	1	1	1	0	0	0.965	miRNA binding
35197	3	0	0	0	1	1	1	0	0	0.9182	siRNA binding
35175	2	0	0	0	1	1	1	0	0	0.965	histone kinase activity (H3-S10 specific)
35174	5	0	0	0	1	1	1	0	0	0.9918	histone serine kinase activity
35173	5	0	0	0	1	1	1	0	0	0.9918	histone kinase activity
35064	1	0	0	0	1	1	1	0	0	0.9859	methylated histone binding
35035	4	0	0	0	1	1	1	0	0	0.9902	histone acetyltransferase binding
35034	1	0	0	0	1	1	1	0	0	0.9859	histone acetyltransferase regulator activity
35014	1	0	0	0	1	1	1	0	0	0.9859	phosphatidylinositol 3-kinase regulator activity
35005	2	0	0	0	1	1	1	0	0	0.965	1-phosphatidylinositol-4-phosphate 3-kinase activity
35004	6	0	0	0	1	1	1	0	0	0.9943	phosphatidylinositol 3-kinase activity
34979	6	0	0	0	1	1	1	0	0	0.9943	NAD-dependent protein deacetylase activity
34930	1	0	0	0	1	1	1	0	0	0.9859	1-hydroxypyrene sulfotransferase activity
34736	1	0	0	0	1	1	1	0	0	0.9859	cholesterol O-acyltransferase activity
34713	1	0	0	0	1	1	1	0	0	0.9859	type I transforming growth factor beta receptor binding
34701	2	0	0	0	1	1	1	0	0	0.965	tripeptidase activity
34648	3	0	0	0	1	1	1	0	0	0.9182	histone demethylase activity (H3-dimethyl-K4 specific)
34647	1	0	0	0	1	1	1	0	0	0.9859	histone demethylase activity (H3-trimethyl-K4 specific)
34639	1	0	0	0	1	1	1	0	0	0.9859	L-amino acid efflux transmembrane transporter activity
34597	2	0	0	0	1	1	1	0	0	0.965	phosphatidylinositol-4,5-bisphosphate 4-phosphatase activity
34596	2	0	0	0	1	1	1	0	0	0.965	phosphatidylinositol phosphate 4-phosphatase activity
34595	2	0	0	0	1	1	1	0	0	0.965	phosphatidylinositol phosphate 5-phosphatase activity
34594	1	0	0	0	1	1	1	0	0	0.9859	phosphatidylinositol trisphosphate phosphatase activity
34593	6	0	0	0	1	1	1	0	0	0.9943	phosphatidylinositol bisphosphate phosphatase activity
34583	1	0	0	0	1	1	1	0	0	0.9859	21U-RNA binding
34511	1	0	0	0	1	1	1	0	0	0.9859	U3 snoRNA binding
34483	6	0	0	0	1	1	1	0	0	0.9943	heparan sulfate sulfotransferase activity
34450	4	0	0	0	1	1	1	0	0	0.9902	ubiquitin-ubiquitin ligase activity
34353	1	0	0	0	1	1	1	0	0	0.9859	RNA pyrophosphohydrolase activity
34212	27	0	0	0	1	1	1	0	0	0.924	peptide N-acetyltransferase activity
34062	37	0	0	0	1	1	1	0	0	0.9876	RNA polymerase activity
34061	13	0	0	0	1	1	1	0	0	0.9994	DNA polymerase activity
34046	3	0	0	0	1	1	1	0	0	0.9182	poly(G) binding
34043	1	0	0	0	1	1	1	0	0	0.9859	5-hydroxymethyluracil DNA N-glycosylase activity
34042	1	0	0	0	1	1	1	0	0	0.9859	5-formyluracil DNA N-glycosylase activity
34038	1	0	0	0	1	1	1	0	0	0.9859	deoxyhypusine synthase activity
33971	2	0	0	0	1	1	1	0	0	0.965	hydroxyisourate hydrolase activity
33961	2	0	0	0	1	1	1	0	0	0.965	cis-stilbene-oxide hydrolase activity
33925	1	0	0	0	1	1	1	0	0	0.9859	mannosyl-glycoprotein endo-beta-N-acetylglucosaminidase activity
33897	1	0	0	0	1	1	1	0	0	0.9859	ribonuclease T2 activity
33862	2	0	0	0	1	1	1	0	0	0.965	UMP kinase activity
33857	1	0	0	0	1	1	1	0	0	0.9859	diphosphoinositol-pentakisphosphate kinase activity
33814	1	0	0	0	1	1	1	0	0	0.9859	propanoyl-CoA C-acyltransferase activity
33765	3	0	0	0	1	1	1	0	0	0.9182	steroid dehydrogenase activity, acting on the CH-CH group of donors
33764	6	0	0	0	1	1	1	0	0	0.9943	steroid dehydrogenase activity, acting on the CH-OH group of donors, NAD or NADP as acceptor
33744	1	0	0	0	1	1	1	0	0	0.9859	L-methionine:thioredoxin-disulfide S-oxidoreductase activity
33743	2	0	0	0	1	1	1	0	0	0.965	peptide-methionine (R)-S-oxide reductase activity
33735	1	0	0	0	1	1	1	0	0	0.9859	aspartate dehydrogenase activity
33613	2	0	0	0	1	1	1	0	0	0.965	activating transcription factor binding
33612	2	0	0	0	1	1	1	0	0	0.965	receptor serine/threonine kinase binding
33558	9	0	0	0	1	1	1	0	0	0.8608	protein deacetylase activity
33549	2	0	0	0	1	1	1	0	0	0.965	MAP kinase phosphatase activity
33293	4	0	0	0	1	1	1	0	0	0.9902	monocarboxylic acid binding
33218	48	0	0	0	1	1	1	0	0	0.996	amide binding
33207	1	0	0	0	1	1	1	0	0	0.9859	beta-1,4-N-acetylgalactosaminyltransferase activity
33204	1	0	0	0	1	1	1	0	0	0.9859	ribonuclease P RNA binding
33192	2	0	0	0	1	1	1	0	0	0.965	calmodulin-dependent protein phosphatase activity
33188	3	0	0	0	1	1	1	0	0	0.9182	sphingomyelin synthase activity
33170	6	0	0	0	1	1	1	0	0	0.9943	protein-DNA loading ATPase activity
33130	2	0	0	0	1	1	1	0	0	0.965	acetylcholine receptor binding
32934	6	0	0	0	1	1	1	0	0	0.9943	sterol binding
32794	7	0	0	0	1	1	1	0	0	1	GTPase activating protein binding
32561	217	0	0	0	1	1	1	0	0	0.9966	guanyl ribonucleotide binding
32454	2	0	0	0	1	1	1	0	0	0.965	histone demethylase activity (H3-K9 specific)
32453	4	0	0	0	1	1	1	0	0	0.9902	histone demethylase activity (H3-K4 specific)
32452	9	0	0	0	1	1	1	0	0	0.8608	histone demethylase activity
32451	10	0	0	0	1	1	1	0	0	0.9672	demethylase activity
32296	3	0	0	0	1	1	1	0	0	0.9182	double-stranded RNA-specific ribonuclease activity
32266	13	0	0	0	1	1	1	0	0	0.9994	phosphatidylinositol-3-phosphate binding
32217	2	0	0	0	1	1	1	0	0	0.965	riboflavin transporter activity
32183	1	0	0	0	1	1	1	0	0	0.9859	SUMO binding
32182	20	0	0	0	1	1	1	0	0	0.9971	ubiquitin-like protein binding
32138	2	0	0	0	1	1	1	0	0	0.965	single base insertion or deletion binding
32137	2	0	0	0	1	1	1	0	0	0.965	guanine/thymine mispair binding
32135	3	0	0	0	1	1	1	0	0	0.9182	DNA insertion or deletion binding
32093	1	0	0	0	1	1	1	0	0	0.9859	SAM domain binding
32050	2	0	0	0	1	1	1	0	0	0.965	clathrin heavy chain binding
32041	5	0	0	0	1	1	1	0	0	0.9918	NAD-dependent histone deacetylase activity (H3-K14 specific)
32038	1	0	0	0	1	1	1	0	0	0.9859	myosin II heavy chain binding
32036	1	0	0	0	1	1	1	0	0	0.9859	myosin heavy chain binding
32035	1	0	0	0	1	1	1	0	0	0.9859	myosin II tail binding
32029	1	0	0	0	1	1	1	0	0	0.9859	myosin tail binding
31849	2	0	0	0	1	1	1	0	0	0.965	olfactory receptor binding
31841	2	0	0	0	1	1	1	0	0	0.965	neuropeptide Y receptor binding
31752	1	0	0	0	1	1	1	0	0	0.9859	D5 dopamine receptor binding
31749	1	0	0	0	1	1	1	0	0	0.9859	D2 dopamine receptor binding
31739	1	0	0	0	1	1	1	0	0	0.9859	cholecystokinin receptor binding
31683	22	0	0	0	1	1	1	0	0	0.9261	G-protein beta/gamma-subunit complex binding
31625	37	0	0	0	1	1	1	0	0	0.9876	ubiquitin protein ligase binding
31624	18	0	0	0	1	1	1	0	0	0.9392	ubiquitin conjugating enzyme binding
31593	2	0	0	0	1	1	1	0	0	0.965	polyubiquitin binding
31545	7	0	0	0	1	1	1	0	0	1	peptidyl-proline 4-dioxygenase activity
31543	8	0	0	0	1	1	1	0	0	0.9654	peptidyl-proline dioxygenase activity
31491	3	0	0	0	1	1	1	0	0	0.9182	nucleosome binding
31490	2	0	0	0	1	1	1	0	0	0.965	chromatin DNA binding
31435	5	0	0	0	1	1	1	0	0	0.9918	mitogen-activated protein kinase kinase kinase binding
31434	2	0	0	0	1	1	1	0	0	0.965	mitogen-activated protein kinase kinase binding
31420	5	0	0	0	1	1	1	0	0	0.9918	alkali metal ion binding
31419	2	0	0	0	1	1	1	0	0	0.965	cobalamin binding
31418	11	0	0	0	1	1	1	0	0	0.9967	L-ascorbic acid binding
31406	32	0	0	0	1	1	1	0	0	0.9258	carboxylic acid binding
31403	1	0	0	0	1	1	1	0	0	0.9859	lithium ion binding
31402	2	0	0	0	1	1	1	0	0	0.965	sodium ion binding
31386	4	0	0	0	1	1	1	0	0	0.9902	protein tag
31369	9	0	0	0	1	1	1	0	0	0.8608	translation initiation factor binding
31177	3	0	0	0	1	1	1	0	0	0.9182	phosphopantetheine binding
31151	6	0	0	0	1	1	1	0	0	0.9943	histone methyltransferase activity (H3-K79 specific)
31127	21	0	0	0	1	1	1	0	0	0.9228	alpha-(1,2)-fucosyltransferase activity
31078	5	0	0	0	1	1	1	0	0	0.9918	histone deacetylase activity (H3-K14 specific)
31072	13	0	0	0	1	1	1	0	0	0.9994	heat shock protein binding
31071	1	0	0	0	1	1	1	0	0	0.9859	cysteine desulfurase activity
31013	2	0	0	0	1	1	1	0	0	0.965	troponin I binding
30983	6	0	0	0	1	1	1	0	0	0.9943	mismatched DNA binding
30976	4	0	0	0	1	1	1	0	0	0.9902	thiamine pyrophosphate binding
30975	1	0	0	0	1	1	1	0	0	0.9859	thiamine binding
30971	8	0	0	0	1	1	1	0	0	0.9654	receptor tyrosine kinase binding
30955	4	0	0	0	1	1	1	0	0	0.9902	potassium ion binding
30943	4	0	0	0	1	1	1	0	0	0.9902	mitochondrion targeting sequence binding
30942	3	0	0	0	1	1	1	0	0	0.9182	endoplasmic reticulum signal peptide binding
30742	1	0	0	0	1	1	1	0	0	0.9859	GTP-dependent protein binding
30729	1	0	0	0	1	1	1	0	0	0.9859	acetoacetate-CoA ligase activity
30695	58	0	0	0	1	1	1	0	0	0.9901	GTPase regulator activity
30676	2	0	0	0	1	1	1	0	0	0.965	Rac guanyl-nucleotide exchange factor activity
30674	12	0	0	0	1	1	1	0	0	0.9975	protein binding, bridging
30628	2	0	0	0	1	1	1	0	0	0.965	pre-mRNA 3'-splice site binding
30627	2	0	0	0	1	1	1	0	0	0.965	pre-mRNA 5'-splice site binding
30623	1	0	0	0	1	1	1	0	0	0.9859	U5 snRNA binding
30621	2	0	0	0	1	1	1	0	0	0.965	U4 snRNA binding
30620	2	0	0	0	1	1	1	0	0	0.965	U2 snRNA binding
30619	5	0	0	0	1	1	1	0	0	0.9918	U1 snRNA binding
30618	1	0	0	0	1	1	1	0	0	0.9859	transforming growth factor beta receptor, pathway-specific cytoplasmic mediator activity
30614	2	0	0	0	1	1	1	0	0	0.965	oxidoreductase activity, acting on phosphorus or arsenic in donors, disulfide as acceptor
30613	2	0	0	0	1	1	1	0	0	0.965	oxidoreductase activity, acting on phosphorus or arsenic in donors
30594	68	0	0	0	1	1	1	0	0	0.9969	neurotransmitter receptor activity
30586	2	0	0	0	1	1	1	0	0	0.965	[methionine synthase] reductase activity
30580	1	0	0	0	1	1	1	0	0	0.9859	quinone cofactor methyltransferase activity
30572	1	0	0	0	1	1	1	0	0	0.9859	phosphatidyltransferase activity
30553	7	0	0	0	1	1	1	0	0	1	cGMP binding
30552	1	0	0	0	1	1	1	0	0	0.9859	cAMP binding
30551	8	0	0	0	1	1	1	0	0	0.9654	cyclic nucleotide binding
30546	1	0	0	0	1	1	1	0	0	0.9859	receptor activator activity
30545	1	0	0	0	1	1	1	0	0	0.9859	receptor regulator activity
30544	3	0	0	0	1	1	1	0	0	0.9182	Hsp70 protein binding
30523	1	0	0	0	1	1	1	0	0	0.9859	dihydrolipoamide S-acyltransferase activity
30515	13	0	0	0	1	1	1	0	0	0.9994	snoRNA binding
30506	1	0	0	0	1	1	1	0	0	0.9859	ankyrin binding
30429	1	0	0	0	1	1	1	0	0	0.9859	kynureninase activity
30414	64	0	0	0	1	1	1	0	0	0.9982	peptidase inhibitor activity
30371	7	0	0	0	1	1	1	0	0	1	translation repressor activity
30368	2	0	0	0	1	1	1	0	0	0.965	interleukin-17 receptor activity
30366	2	0	0	0	1	1	1	0	0	0.965	molybdopterin synthase activity
30346	2	0	0	0	1	1	1	0	0	0.965	protein phosphatase 2B binding
30337	1	0	0	0	1	1	1	0	0	0.9859	DNA polymerase processivity factor activity
30297	1	0	0	0	1	1	1	0	0	0.9859	transmembrane receptor protein tyrosine kinase activator activity
30296	1	0	0	0	1	1	1	0	0	0.9859	protein tyrosine kinase activator activity
30295	5	0	0	0	1	1	1	0	0	0.9918	protein kinase activator activity
30291	4	0	0	0	1	1	1	0	0	0.9902	protein serine/threonine kinase inhibitor activity
30283	1	0	0	0	1	1	1	0	0	0.9859	testosterone dehydrogenase [NAD(P)] activity
30276	21	0	0	0	1	1	1	0	0	0.9228	clathrin binding
30274	3	0	0	0	1	1	1	0	0	0.9182	LIM domain binding
30272	3	0	0	0	1	1	1	0	0	0.9182	5-formyltetrahydrofolate cyclo-ligase activity
30247	3	0	0	0	1	1	1	0	0	0.9182	polysaccharide binding
30246	314	0	0	0	1	1	1	0	0	0.9991	carbohydrate binding
30235	1	0	0	0	1	1	1	0	0	0.9859	nitric-oxide synthase regulator activity
30234	203	0	0	0	1	1	1	0	0	0.9342	enzyme regulator activity
30228	1	0	0	0	1	1	1	0	0	0.9859	lipoprotein particle receptor activity
30215	4	0	0	0	1	1	1	0	0	0.9902	semaphorin receptor binding
30172	4	0	0	0	1	1	1	0	0	0.9902	troponin C binding
30170	53	0	0	0	1	1	1	0	0	0.9924	pyridoxal phosphate binding
30165	6	0	0	0	1	1	1	0	0	0.9943	PDZ domain binding
30158	1	0	0	0	1	1	1	0	0	0.9859	protein xylosyltransferase activity
30151	5	0	0	0	1	1	1	0	0	0.9918	molybdenum ion binding
30145	11	0	0	0	1	1	1	0	0	0.9967	manganese ion binding
30144	1	0	0	0	1	1	1	0	0	0.9859	alpha-1,6-mannosylglycoprotein 6-beta-N-acetylglucosaminyltransferase activity
30060	2	0	0	0	1	1	1	0	0	0.965	L-malate dehydrogenase activity
30020	1	0	0	0	1	1	1	0	0	0.9859	extracellular matrix structural constituent conferring tensile strength
22889	2	0	0	0	1	1	1	0	0	0.965	serine transmembrane transporter activity
22884	18	0	0	0	1	1	1	0	0	0.9392	macromolecule transmembrane transporter activity
22853	85	0	0	0	1	1	1	0	0	0.995	active ion transmembrane transporter activity
22848	2	0	0	0	1	1	1	0	0	0.965	acetylcholine-gated cation channel activity
22843	39	0	0	0	1	1	1	0	0	0.9968	voltage-gated cation channel activity
22839	6	0	0	0	1	1	1	0	0	0.9943	ion gated channel activity
22835	13	0	0	0	1	1	1	0	0	0.9994	transmitter-gated channel activity
22833	1	0	0	0	1	1	1	0	0	0.9859	mechanically gated channel activity
22832	52	0	0	0	1	1	1	0	0	0.9993	voltage-gated channel activity
22829	19	0	0	0	1	1	1	0	0	0.9997	wide pore channel activity
22824	13	0	0	0	1	1	1	0	0	0.9994	transmitter-gated ion channel activity
22821	2	0	0	0	1	1	1	0	0	0.965	potassium ion antiporter activity
22820	4	0	0	0	1	1	1	0	0	0.9902	potassium ion symporter activity
20037	153	0	0	0	1	1	1	0	0	0.9922	heme binding
19992	1	0	0	0	1	1	1	0	0	0.9859	diacylglycerol binding
19955	2	0	0	0	1	1	1	0	0	0.965	cytokine binding
19948	2	0	0	0	1	1	1	0	0	0.965	SUMO activating enzyme activity
19905	26	0	0	0	1	1	1	0	0	0.9879	syntaxin binding
19903	13	0	0	0	1	1	1	0	0	0.9994	protein phosphatase binding
19902	16	0	0	0	1	1	1	0	0	0.9965	phosphatase binding
19894	8	0	0	0	1	1	1	0	0	0.9654	kinesin binding
19888	13	0	0	0	1	1	1	0	0	0.9994	protein phosphatase regulator activity
19887	35	0	0	0	1	1	1	0	0	0.9965	protein kinase regulator activity
19855	2	0	0	0	1	1	1	0	0	0.965	calcium channel inhibitor activity
19843	30	0	0	0	1	1	1	0	0	0.9878	rRNA binding
19842	26	0	0	0	1	1	1	0	0	0.9879	vitamin binding
19841	1	0	0	0	1	1	1	0	0	0.9859	retinol binding
19840	1	0	0	0	1	1	1	0	0	0.9859	isoprenoid binding
19838	3	0	0	0	1	1	1	0	0	0.9182	growth factor binding
19829	42	0	0	0	1	1	1	0	0	0.9939	cation-transporting ATPase activity
19826	5	0	0	0	1	1	1	0	0	0.9918	oxygen sensor activity
19825	39	0	0	0	1	1	1	0	0	0.9968	oxygen binding
19799	2	0	0	0	1	1	1	0	0	0.965	tubulin N-acetyltransferase activity
19798	2	0	0	0	1	1	1	0	0	0.965	procollagen-proline dioxygenase activity
19789	4	0	0	0	1	1	1	0	0	0.9902	SUMO transferase activity
19788	3	0	0	0	1	1	1	0	0	0.9182	NEDD8 transferase activity
19787	126	0	0	0	1	1	1	0	0	0.9974	ubiquitin-like protein transferase activity
19784	2	0	0	0	1	1	1	0	0	0.965	NEDD8-specific protease activity
19781	2	0	0	0	1	1	1	0	0	0.965	NEDD8 activating enzyme activity
19779	1	0	0	0	1	1	1	0	0	0.9859	Atg8 activating enzyme activity
19778	1	0	0	0	1	1	1	0	0	0.9859	Atg12 activating enzyme activity
19776	4	0	0	0	1	1	1	0	0	0.9902	Atg8 ligase activity
19707	16	0	0	0	1	1	1	0	0	0.9965	protein-cysteine S-acyltransferase activity
19706	16	0	0	0	1	1	1	0	0	0.9965	protein-cysteine S-palmitoyltransferase activity
19534	1	0	0	0	1	1	1	0	0	0.9859	toxin transporter activity
19531	8	0	0	0	1	1	1	0	0	0.9654	oxalate transmembrane transporter activity
19239	22	0	0	0	1	1	1	0	0	0.9261	deaminase activity
19215	1	0	0	0	1	1	1	0	0	0.9859	intermediate filament binding
19213	11	0	0	0	1	1	1	0	0	0.9967	deacetylase activity
19212	7	0	0	0	1	1	1	0	0	1	phosphatase inhibitor activity
19211	1	0	0	0	1	1	1	0	0	0.9859	phosphatase activator activity
19210	13	0	0	0	1	1	1	0	0	0.9994	kinase inhibitor activity
19209	5	0	0	0	1	1	1	0	0	0.9918	kinase activator activity
19208	14	0	0	0	1	1	1	0	0	0.9383	phosphatase regulator activity
19207	36	0	0	0	1	1	1	0	0	0.9973	kinase regulator activity
19206	5	0	0	0	1	1	1	0	0	0.9918	nucleoside kinase activity
19205	22	0	0	0	1	1	1	0	0	0.9261	nucleobase-containing compound kinase activity
19203	3	0	0	0	1	1	1	0	0	0.9182	carbohydrate phosphatase activity
19202	3	0	0	0	1	1	1	0	0	0.9182	amino acid kinase activity
19201	11	0	0	0	1	1	1	0	0	0.9967	nucleotide kinase activity
19200	10	0	0	0	1	1	1	0	0	0.9672	carbohydrate kinase activity
19198	5	0	0	0	1	1	1	0	0	0.9918	transmembrane receptor protein phosphatase activity
19187	1	0	0	0	1	1	1	0	0	0.9859	beta-1,4-mannosyltransferase activity
19172	2	0	0	0	1	1	1	0	0	0.965	glyoxalase III activity
19171	1	0	0	0	1	1	1	0	0	0.9859	3-hydroxyacyl-[acyl-carrier-protein] dehydratase activity
19166	2	0	0	0	1	1	1	0	0	0.965	trans-2-enoyl-CoA reductase (NADPH) activity
19158	3	0	0	0	1	1	1	0	0	0.9182	mannokinase activity
19145	3	0	0	0	1	1	1	0	0	0.9182	aminobutyraldehyde dehydrogenase activity
19136	1	0	0	0	1	1	1	0	0	0.9859	deoxynucleoside kinase activity
19135	1	0	0	0	1	1	1	0	0	0.9859	deoxyhypusine monooxygenase activity
19107	1	0	0	0	1	1	1	0	0	0.9859	myristoyltransferase activity
19104	3	0	0	0	1	1	1	0	0	0.9182	DNA N-glycosylase activity
19003	1	0	0	0	1	1	1	0	0	0.9859	GDP binding
19001	217	0	0	0	1	1	1	0	0	0.9966	guanyl nucleotide binding
18738	1	0	0	0	1	1	1	0	0	0.9859	S-formylglutathione hydrolase activity
18478	1	0	0	0	1	1	1	0	0	0.9859	malonate-semialdehyde dehydrogenase (acetylating) activity
18423	1	0	0	0	1	1	1	0	0	0.9859	protein C-terminal leucine carboxyl O-methyltransferase activity
18271	1	0	0	0	1	1	1	0	0	0.9859	biotin-protein ligase activity
18024	26	0	0	0	1	1	1	0	0	0.9879	histone-lysine N-methyltransferase activity
17178	1	0	0	0	1	1	1	0	0	0.9859	diphthine-ammonia ligase activity
17176	2	0	0	0	1	1	1	0	0	0.965	phosphatidylinositol N-acetylglucosaminyltransferase activity
17172	1	0	0	0	1	1	1	0	0	0.9859	cysteine dioxygenase activity
17169	3	0	0	0	1	1	1	0	0	0.9182	CDP-alcohol phosphatidyltransferase activity
17166	1	0	0	0	1	1	1	0	0	0.9859	vinculin binding
17154	3	0	0	0	1	1	1	0	0	0.9182	semaphorin receptor activity
17153	8	0	0	0	1	1	1	0	0	0.9654	sodium:dicarboxylate symporter activity
17151	16	0	0	0	1	1	1	0	0	0.9965	DEAD/H-box RNA helicase binding
17150	4	0	0	0	1	1	1	0	0	0.9902	tRNA dihydrouridine synthase activity
17147	8	0	0	0	1	1	1	0	0	0.9654	Wnt-protein binding
17136	5	0	0	0	1	1	1	0	0	0.9918	NAD-dependent histone deacetylase activity
17134	1	0	0	0	1	1	1	0	0	0.9859	fibroblast growth factor binding
17128	8	0	0	0	1	1	1	0	0	0.9654	phospholipid scramblase activity
17127	2	0	0	0	1	1	1	0	0	0.965	cholesterol transporter activity
17116	1	0	0	0	1	1	1	0	0	0.9859	single-stranded DNA-dependent ATP-dependent DNA helicase activity
17113	1	0	0	0	1	1	1	0	0	0.9859	dihydropyrimidine dehydrogenase (NADP+) activity
17112	5	0	0	0	1	1	1	0	0	0.9918	Rab guanyl-nucleotide exchange factor activity
17110	5	0	0	0	1	1	1	0	0	0.9918	nucleoside-diphosphatase activity
17108	2	0	0	0	1	1	1	0	0	0.965	5'-flap endonuclease activity
17099	1	0	0	0	1	1	1	0	0	0.9859	very-long-chain-acyl-CoA dehydrogenase activity
17095	2	0	0	0	1	1	1	0	0	0.965	heparan sulfate 6-O-sulfotransferase activity
17091	3	0	0	0	1	1	1	0	0	0.9182	AU-rich element binding
17089	3	0	0	0	1	1	1	0	0	0.9182	glycolipid transporter activity
17070	6	0	0	0	1	1	1	0	0	0.9943	U6 snRNA binding
17069	14	0	0	0	1	1	1	0	0	0.9383	snRNA binding
17061	1	0	0	0	1	1	1	0	0	0.9859	S-methyl-5-thioadenosine phosphorylase activity
17057	1	0	0	0	1	1	1	0	0	0.9859	6-phosphogluconolactonase activity
17056	10	0	0	0	1	1	1	0	0	0.9672	structural constituent of nuclear pore
17050	1	0	0	0	1	1	1	0	0	0.9859	D-erythro-sphingosine kinase activity
17049	2	0	0	0	1	1	1	0	0	0.965	GTP-Rho binding
17046	1	0	0	0	1	1	1	0	0	0.9859	peptide hormone binding
17040	2	0	0	0	1	1	1	0	0	0.965	ceramidase activity
17034	3	0	0	0	1	1	1	0	0	0.9182	Rap guanyl-nucleotide exchange factor activity
17025	10	0	0	0	1	1	1	0	0	0.9672	TBP-class protein binding
17022	6	0	0	0	1	1	1	0	0	0.9943	myosin binding
17017	2	0	0	0	1	1	1	0	0	0.965	MAP kinase tyrosine/serine/threonine phosphatase activity
17005	1	0	0	0	1	1	1	0	0	0.9859	3'-tyrosyl-DNA phosphodiesterase activity
16992	1	0	0	0	1	1	1	0	0	0.9859	lipoate synthase activity
16979	1	0	0	0	1	1	1	0	0	0.9859	lipoate-protein ligase activity
16972	5	0	0	0	1	1	1	0	0	0.9918	thiol oxidase activity
16971	3	0	0	0	1	1	1	0	0	0.9182	flavin-linked sulfhydryl oxidase activity
16936	2	0	0	0	1	1	1	0	0	0.965	galactoside binding
16929	2	0	0	0	1	1	1	0	0	0.965	SUMO-specific protease activity
16922	1	0	0	0	1	1	1	0	0	0.9859	ligand-dependent nuclear receptor binding
16917	6	0	0	0	1	1	1	0	0	0.9943	GABA receptor activity
16909	2	0	0	0	1	1	1	0	0	0.965	SAP kinase activity
16907	3	0	0	0	1	1	1	0	0	0.9182	G-protein coupled acetylcholine receptor activity
16903	28	0	0	0	1	1	1	0	0	0.9238	oxidoreductase activity, acting on the aldehyde or oxo group of donors
16901	4	0	0	0	1	1	1	0	0	0.9902	oxidoreductase activity, acting on the CH-OH group of donors, quinone or similar compound as acceptor
16896	9	0	0	0	1	1	1	0	0	0.8608	exoribonuclease activity, producing 5'-phosphomonoesters
16895	8	0	0	0	1	1	1	0	0	0.9654	exodeoxyribonuclease activity, producing 5'-phosphomonoesters
16894	12	0	0	0	1	1	1	0	0	0.9975	endonuclease activity, active with either ribo- or deoxyribonucleic acids and producing 3'-phosphomonoesters
16893	25	0	0	0	1	1	1	0	0	0.9898	endonuclease activity, active with either ribo- or deoxyribonucleic acids and producing 5'-phosphomonoesters
16892	6	0	0	0	1	1	1	0	0	0.9943	endoribonuclease activity, producing 3'-phosphomonoesters
16891	19	0	0	0	1	1	1	0	0	0.9997	endoribonuclease activity, producing 5'-phosphomonoesters
16889	6	0	0	0	1	1	1	0	0	0.9943	endodeoxyribonuclease activity, producing 3'-phosphomonoesters
16888	7	0	0	0	1	1	1	0	0	1	endodeoxyribonuclease activity, producing 5'-phosphomonoesters
16886	9	0	0	0	1	1	1	0	0	0.8608	ligase activity, forming phosphoric ester bonds
16885	5	0	0	0	1	1	1	0	0	0.9918	ligase activity, forming carbon-carbon bonds
16882	4	0	0	0	1	1	1	0	0	0.9902	cyclo-ligase activity
16881	6	0	0	0	1	1	1	0	0	0.9943	acid-amino acid ligase activity
16880	6	0	0	0	1	1	1	0	0	0.9943	acid-ammonia (or amide) ligase activity
16878	6	0	0	0	1	1	1	0	0	0.9943	acid-thiol ligase activity
16877	15	0	0	0	1	1	1	0	0	0.998	ligase activity, forming carbon-sulfur bonds
16876	36	0	0	0	1	1	1	0	0	0.9973	ligase activity, forming aminoacyl-tRNA and related compounds
16875	36	0	0	0	1	1	1	0	0	0.9973	ligase activity, forming carbon-oxygen bonds
16872	1	0	0	0	1	1	1	0	0	0.9859	intramolecular lyase activity
16868	5	0	0	0	1	1	1	0	0	0.9918	intramolecular transferase activity, phosphotransferases
16866	17	0	0	0	1	1	1	0	0	0.9347	intramolecular transferase activity
16864	19	0	0	0	1	1	1	0	0	0.9997	intramolecular oxidoreductase activity, transposing S-S bonds
[truncated: 1,257 more rows]

## Sheet: Molecular Function SNPs
GO ID	Category	Gene	Change	Gene ID
[truncated: 389 more rows]
