# Supplementary material
Source: publisher figshare collection journal article supplement (https://gsajournals.figshare.com/articles/dataset/_/7609925)
Supplement: Supplementary file 1 [file 2]

**Table S1. Illumina-HiSeq 3000 sequencing run statistics.** All reads 150bp, paired end. All nematodes at L1 stage. Assembled using WS242 *C. elegans* reference genome in CLC with parameters described in Materials and Methods. Overall nuclear coverage (Avg Nuc Cov) calculated for entire nuclear genome per line. Average mitochondrial coverage (Avg mtDNA Cov) calculated for whole mitochondrial genome coverage per line. Standard deviation of the mean displayed in parentheses adjacent to mean values.

| Line            | Total Reads | Percent Mapped | Avg Nuc Cov | Avg mtDNA Cov  |
|-----------------|-------------|----------------|-------------|----------------|
| N2              | 20,728,966  | 79.83%         | 24 (0.6)    | 783.3 (119.1)  |
| <i>gas-1</i> G0 | 18,773,512  | 79.95%         | 21.8 (0.7)  | 835.0 (130.0)  |
| RC 1            | 19,786,862  | 81.69%         | 23.8 (0.7)  | 918.9 (203.9)  |
| RC 2            | 19,247,616  | 81.07%         | 22.7 (0.7)  | 1164.8 (182.1) |
| RC 3            | 21,439,774  | 80.93%         | 25.3 (0.7)  | 1181.2 (184.9) |
| RC 4            | 16,474,084  | 79.60%         | 19.2 (0.7)  | 905.7 (141.7)  |
| RC 5            | 19,538,046  | 82.19%         | 23.5 (0.5)  | 1093.3 (178.9) |
| RC 6            | 19,619,022  | 81.42%         | 23.3 (0.5)  | 1126.8 (200.9) |
| RC 7            | 21,495,750  | 80.90%         | 25.5 (0.5)  | 1309.4 (221.6) |
| RC 8            | 16,295,230  | 79.21%         | 18.7 (0.7)  | 1267.2 (196.5) |
| RC 9            | 22,938,664  | 82.50%         | 27.7 (0.7)  | 1418.3 (276.9) |
| RC 10           | 22,568,108  | 80.31%         | 26.5 (0.5)  | 1199.1 (172.4) |
| RC 11           | 20,643,212  | 81.39%         | 24.7 (0.7)  | 1475.5 (218.5) |
| RC 12           | 18,032,434  | 78.77%         | 20.8 (0.7)  | 987.9 (177.7)  |
| RC 13           | 21,139,024  | 80.92%         | 25.0 (0.8)  | 975.3 (167.5)  |
| RC 14           | 20,883,266  | 81.24%         | 24.8 (0.7)  | 1005.6 (167.1) |
| RC 15           | 20,963,736  | 80.87%         | 25.0 (0.8)  | 835.2 (140.4)  |
| RC 16           | 22,865,822  | 80.92%         | 27.0 (0.8)  | 1200.1 (224.6) |
| RC 17           | 21,378,998  | 82.74%         | 26.0 (0.8)  | 1126.3 (183.5) |
| RC 18           | 21,058,244  | 82.17%         | 25.5 (1.0)  | 918.8 (156.3)  |
| RC 19           | 20,711,046  | 81.42%         | 24.5 (0.5)  | 1017.7 (171.5) |
| RC 20           | 19,369,868  | 81.33%         | 23.0 (0.6)  | 919.8 (160.9)  |
| RC 21           | 21,488,148  | 82.19%         | 26.0 (0.8)  | 1179.7 (189.3) |
| RC 22           | 20,626,582  | 82.57%         | 25.2 (0.7)  | 965.8 (163.2)  |
| RC 23           | 20,960,498  | 82.22%         | 25.3 (0.7)  | 1046.2 (189.6) |
| RC 24           | 18,399,798  | 80.77%         | 21.8 (0.7)  | 697.0 (123.8)  |

**Table S2. Two-way mixed-model ANOVA for *gas-1* G0 and *gas-1* RC life-history traits.**

| <b>Fitness relative to N2</b>              |        |      |       |                |                |
|--------------------------------------------|--------|------|-------|----------------|----------------|
| Source                                     | SS     | d.f. | MS    | <i>F</i> ratio | <i>p</i> value |
| Strain                                     | 0.332  | 1    | 0.332 | 0.489          | 0.4919         |
| Line(Strain)                               | 7.896  | 23   | 0.343 | 20.44          | <0.0001        |
| Model                                      | 8.245  | 24   | 0.344 | 20.45          | <0.0001        |
| Error                                      | 1.646  | 98   | 0.017 |                |                |
| Total                                      | 9.892  | 122  |       |                |                |
| <b>Fitness relative to <i>gas-1</i> G0</b> |        |      |       |                |                |
| Source                                     | SS     | d.f. | MS    | <i>F</i> ratio | <i>p</i> value |
| Strain                                     | 22.06  | 1    | 22.06 | 0.659          | 0.4257         |
| Line(Strain)                               | 390.8  | 23   | 16.99 | 16.73          | <0.0001        |
| Model                                      | 413.9  | 24   | 17.24 | 16.98          | <0.0001        |
| Error                                      | 99.51  | 98   | 1.015 |                |                |
| Total                                      | 513.4  | 122  |       |                |                |
| <b>Absolute fitness</b>                    |        |      |       |                |                |
| Source                                     | SS     | d.f. | MS    | <i>F</i> ratio | <i>p</i> value |
| Strain                                     | 39790  | 1    | 39790 | 1.793          | 0.1966         |
| Line(Strain)                               | 279000 | 23   | 12130 | 5.108          | <0.0001        |
| Model                                      | 320000 | 24   | 13330 | 5.615          | <0.0001        |
| Error                                      | 230000 | 98   | 2375  |                |                |
| Total                                      | 550000 | 122  |       |                |                |

**Table S3: Normalization of mean mtDNA copy number.** All reads 150bp, paired end. All nematodes at L1 stage. Assembled using WS242 *C. elegans* reference genome in CLC with following parameters: no masking, mismatch cost= 2, insertion cost=3, deletion cost= 3, length fraction= 0.98, read fraction= 0.98, global alignment= no, non-specific match handling= map randomly. mtDNA copy number normalized by mean coverage of corresponding single-copy nuclear genes (Norm mtDNA). mtDNA mean coverage calculated excluding AT-region (Avg Norm mtDNA Cov). Average single-copy nuclear coverage (Avg Single-Copy) calculated from average of three single copy genes: *ama-1* (Avg *ama-1* Cov), *ego-1* (Avg *ego-1* Cov), *efl-3* (Avg *efl-3* Cov). Standard deviation of the mean displayed in parentheses adjacent to mean values.

| Line            | Avg Norm mtDNA Cov | Avg Single Nuc Cov | Avg <i>ama-1</i> Cov | Avg <i>ego-1</i> Cov | Avg <i>efl-1</i> Cov |
|-----------------|--------------------|--------------------|----------------------|----------------------|----------------------|
| N2              | 120.6 (16.1)       | 20.5 (6.5)         | 23.2 (7.0)           | 26.4 (7.3)           | 11.8 (7.2)           |
| <i>gas-1</i> G0 | 128.2 (16.8)       | 19.4 (6.5)         | 19.8 (6.1)           | 27.0 (8.7)           | 11.2 (7.3)           |
| RC 1            | 116.5 (22.9)       | 20.5 (7.9)         | 24.4 (8.0)           | 27.1 (6.8)           | 9.9 (7.3)            |
| RC 2            | 157.8 (20.1)       | 19.3 (7.4)         | 20.9 (6.4)           | 27.2 (7.5)           | 9.8 (5.8)            |
| RC 3            | 164.2 (20.2)       | 21.3 (7.3)         | 24.5 (7.6)           | 28.1 (7.6)           | 11.2 (7.7)           |
| RC 4            | 133.2 (17.6)       | 18.0 (6.8)         | 20.3 (6.9)           | 24.8 (6.8)           | 8.8 (5.6)            |
| RC 5            | 153.5 (20.1)       | 20.5 (7.2)         | 22.7 (6.7)           | 28.0 (6.7)           | 10.9 (7.1)           |
| RC 6            | 165.7 (23.8)       | 20.0 (6.9)         | 24.6 (8.9)           | 25.1 (7.1)           | 10.3 (6.1)           |
| RC 7            | 207.0 (28.8)       | 22.4 (6.4)         | 24.4 (6.5)           | 28.8 (7.3)           | 13.9 (9.1)           |
| RC 8            | 223.0 (27.6)       | 15.3 (5.7)         | 18.0 (4.9)           | 20.2 (5.3)           | 7.8 (5.2)            |
| RC 9            | 192.1 (33.1)       | 22.1 (7.4)         | 23.2 (7.0)           | 30.1 (8.3)           | 12.9 (6.5)           |
| RC 10           | 186.7 (20.1)       | 22.4 (6.5)         | 25.9 (7.9)           | 28.4 (7.8)           | 13.1 (6.9)           |
| RC 11           | 230.1 (24.9)       | 20.3 (6.5)         | 23.4 (6.8)           | 26.4 (9.5)           | 11.2 (6.5)           |
| RC 12           | 133.7 (20.5)       | 19.3 (7.4)         | 20.5 (6.5)           | 27.6 (7.5)           | 9.7 (6.0)            |
| RC 13           | 164.6 (25.3)       | 20.8 (5.9)         | 24.6 (6.5)           | 25.6 (9.5)           | 12.3 (6.0)           |
| RC 14           | 123.3 (17.8)       | 21.5 (8.2)         | 21.8 (6.6)           | 31.2 (7.9)           | 11.5 (6.5)           |
| RC 15           | 117.2 (17.3)       | 20.5 (7.1)         | 24.6 (7.0)           | 26.6 (6.3)           | 10.4 (6.5)           |
| RC 16           | 172.3 (27.7)       | 23.6 (7.0)         | 24.7 (6.8)           | 31.9 (8.2)           | 14.2 (8.1)           |
| RC 17           | 161.1 (20.5)       | 21.9 (7.1)         | 23.3 (7.1)           | 29.9 (9.7)           | 12.6 (6.8)           |
| RC 18           | 110.8 (17.0)       | 21.3 (8.3)         | 23.5 (7.1)           | 30.0 (8.5)           | 10.3 (6.0)           |
| RC 19           | 165.9 (24.6)       | 20.2 (6.2)         | 20.2 (6.2)           | 27.9 (8.1)           | 12.5 (7.5)           |
| RC 20           | 157.7 (25.0)       | 19.4 (5.8)         | 20.7 (6.6)           | 25.5 (6.8)           | 11.8 (6.3)           |
| RC 21           | 170.5 (22.1)       | 22.3 (7.0)         | 25.8 (9.6)           | 28.5 (8.2)           | 12.5 (7.3)           |
| RC 22           | 156.6 (22.4)       | 21.1 (6.2)         | 24.4 (7.1)           | 26.7 (6.3)           | 12.1 (7.3)           |

|       |              |            |            |            |            |
|-------|--------------|------------|------------|------------|------------|
| RC 23 | 121.9 (19.3) | 22.4 (8.6) | 23.4 (6.6) | 32.3 (9.3) | 11.3 (5.9) |
| RC 24 | 98.2 (14.7)  | 19.3 (7.1) | 25.0 (7.8) | 23.4 (6.3) | 9.4 (6.2)  |

**Table S4. *gas-1* G0 mutations lost within RC lines.** List of four mutations present in the backcrossed *gas-1* G0 ancestor compared to the wildtype (N2) reference strain sequence that were subsequently lost within individual RC lines during laboratory evolution. Ch = chromosome, Mut Type = mutation type, Ref Codon = reference codon in N2 sequence, Ref AA = reference amino acid in N2 sequence, Mut Codon = mutation codon in *gas-1* G0, Mut AA = mutation amino acid in *gas-1* G0, Line(s) = RC lines numbers in which each mutation was lost. The chromosome X SNP residing within an intron of *fox-1* was lost by three RC lines each belonging to the higher-fitness class (Figure 1) and noted as having high male frequency; the other three SNPs (on chromosomes II, V and X) were lost by different RC lines each belonging to the lower-fitness class and not noted to have evolved high male frequency.

| Ch | Position | Mut Type  | Gene     | Type   | Ref Codon | Ref AA | Mut Codon | Mut AA | Line(s)               |
|----|----------|-----------|----------|--------|-----------|--------|-----------|--------|-----------------------|
| II | 1302680  | G:C → C:G | emc-2    | Exon   | GTC       | Val    | GTG       | Val    | RC6                   |
| V  | 18718740 | A:T → T:A | Y17D7C.2 | Intron |           |        |           |        | RC1                   |
| X  | 2445717  | A:T → T:A | fox-1    | Intron |           |        |           |        | RC3,<br>RC12,<br>RC24 |
| X  | 14203413 | G:C → A:T | ceh-37   | Intron |           |        |           |        | RC14                  |

**Table S5. mtDNA single-nucleotide polymorphisms.** Variant refers to alleles differing from the WS242 reference genome and wildtype N2 control. Ref Nuc = reference nucleotide, Ref Cov = coverage of reference allele, Var Nuc = variant nucleotide, Ref Codon = reference codon, Ref AA = reference amino acid, var codon = variant codon, Var AA = variant amino acid, site specific variant frequency (Var Freq) was calculated by dividing number of variant calls (Var Cov) by the total coverage at the position (Ref Cov + Var Cov).

| Line  | Pos   | Gene     | Ref Nuc | Ref Cov | Var Nuc | Var Cov | Total Cov | Var Freq | Ref Codon | Ref AA | Var Codon | Var AA |
|-------|-------|----------|---------|---------|---------|---------|-----------|----------|-----------|--------|-----------|--------|
| N2    | 5079  | cytb     | G       | 6       | A       | 640     | 646       | 0.9907   | GGG       | Gly    | GGA       | Gly    |
| N2    | 4391  | tRNA-Gln | C       | 3       | T       | 740     | 743       | 0.9960   |           |        |           |        |
| N2    | 8429  | cox-1    | A       | 5       | G       | 870     | 875       | 0.9943   | GTA       | Val    | GTA       | Val    |
| RC 3  | 2154  | nduo-1   | T       | 7       | C       | 1095    | 1102      | 0.9936   | ATA       | Met    | ACA       | Thr    |
| RC 3  | 9145  | cox-1    | C       | 1246    | T       | 33      | 1279      | 0.0258   | CCG       | Pro    | CTG       | Leu    |
| RC 4  | 219   | nduo-6   | G       | 772     | T       | 30      | 802       | 0.0374   | AGT       | Ser    | ATT       | Met    |
| RC 5  | 1977  | nduo-1   | C       | 683     | T       | 403     | 1086      | 0.3711   | TCA       | Ser    | TTA       | Leu    |
| RC 13 | 227   | nduo-6   | G       | 40      | T       | 721     | 761       | 0.9474   | GTT       | Val    | TTT       | Phe    |
| RC 13 | 5079  | cytb     | G       | 919     | A       | 66      | 985       | 0.0670   | GGG       | Gly    | GGA       | Gly    |
| RC 14 | 8057  | cox-1    | T       | 1073    | A       | 45      | 1118      | 0.0403   | ATT       | Met    | ATA       | Met    |
| RC 17 | 851   | tRNA-Glu | G       | 1052    | T       | 39      | 1091      | 0.0357   |           |        |           |        |
| RC 18 | 227   | nduo-6   | G       | 5       | T       | 662     | 667       | 0.9925   | GTT       | Val    | TTT       | Phe    |
| RC 19 | 10846 | 16S-rRNA | G       | 939     | T       | 30      | 969       | 0.0310   |           |        |           |        |
| RC 19 | 11734 | nduo-5   | G       | 881     | T       | 23      | 904       | 0.0254   | GGT       | Gly    | GTT       | Val    |
| RC 22 | 1977  | nduo-1   | C       | 1       | T       | 907     | 908       | 0.9989   | TCA       | Ser    | TTA       | Leu    |
| RC 24 | 227   | nduo-6   | G       | 1       | T       | 542     | 543       | 0.9982   | GTT       | Val    | TTT       | Phe    |

**Table S6. RC line nuclear mutations.** RC line mutations were identified by mapping to WS424 N2 reference sequence. All mutations in *gas-1* RC lines compared to *gas-1* G0 progenitor and wildtype (N2) Denver lab reference strain sequence to eliminate Denver-lab N2 variants. Ch = chromosome, Ref Nuc = reference nucleotide, Mut Nuc= mutation nucleotide, Cov = coverage at position. Mutation type was categorized as either intergenic (IG), intronic (IN), exonic (EX), or pseudogene (PS). Ref codon = reference codon in WS424 genome, Ref AA = reference amino acid in WS424 genome, Mut codon= mutation codon, Mut AA = mutation amino acid, Syn/Non indicates if mutation was synonymous or non-synonymous.

| Line | Ch  | Position   | Ref Nuc | Mut Nuc | Cov | Type | Gene      | Ref Codon | Ref AA | Mut Codon | Mut AA | Syn/Non |
|------|-----|------------|---------|---------|-----|------|-----------|-----------|--------|-----------|--------|---------|
| RC 1 | I   | 12,782,722 | A       | G       | 6   | IG   |           |           |        |           |        |         |
| RC 1 | II  | 4,642,450  | A       | T       | 7   | IG   |           |           |        |           |        |         |
| RC 1 | II  | 14,338,105 | G       | A       | 9   | IG   |           |           |        |           |        |         |
| RC 1 | V   | 9,603,829  | T       | C       | 7   | IG   |           |           |        |           |        |         |
| RC 1 | X   | 8,651,733  | A       | T       | 5   | IG   |           |           |        |           |        |         |
| RC 2 | III | 7,425,423  | C       | A       | 8   | IG   |           |           |        |           |        |         |
| RC 2 | IV  | 7,591,706  | A       | G       | 5   | EX   | tag-80    | AAG       | Lys    | AGG       | Arg    | Non     |
| RC 2 | V   | 5,084,795  | A       | G       | 6   | EX   | Y58A7A.4  | GAT       | Asp    | GAC       | Asp    | Syn     |
| RC 2 | V   | 5,084,806  | C       | A       | 6   | EX   | Y58A7A.4  | GCA       | Ala    | TCA       | Ser    | Non     |
| RC 2 | V   | 17,412,257 | C       | A       | 6   | IG   |           |           |        |           |        |         |
| RC 2 | X   | 5,283,318  | G       | A       | 5   | IN   | Y34B4A.2  |           |        |           |        |         |
| RC 3 | I   | 1,413,024  | T       | C       | 7   | EX   | set-29    | AAT       | Asn    | AAC       | Asn    | Syn     |
| RC 3 | I   | 15,01,842  | C       | T       | 11  | IN   | Y92H12A.5 |           |        |           |        |         |
| RC 3 | I   | 13,203,218 | T       | G       | 23  | IG   |           |           |        |           |        |         |
| RC 3 | III | 7,415,219  | A       | C       | 21  | IG   |           |           |        |           |        |         |
| RC 3 | V   | 1,164,088  | C       | T       | 24  | IN   | T21H3.5   |           |        |           |        |         |
| RC 3 | V   | 13,645,972 | T       | C       | 8   | IG   |           |           |        |           |        |         |
| RC 3 | X   | 7,607,385  | C       | T       | 30  | IN   | twk-17    |           |        |           |        |         |
| RC 4 | I   | 10,137,355 | C       | T       | 5   | IG   |           |           |        |           |        |         |
| RC 4 | X   | 4,028,900  | A       | T       | 7   | IG   |           |           |        |           |        |         |
| RC 5 | III | 3,386,567  | T       | A       | 5   | IG   |           |           |        |           |        |         |
| RC 5 | III | 3,897,472  | A       | G       | 10  | IN   | tir-1     |           |        |           |        |         |
| RC 5 | X   | 4,037,336  | G       | A       | 6   | IG   |           |           |        |           |        |         |
| RC 5 | X   | 14,679,813 | T       | A       | 36  | IN   | slt-1     |           |        |           |        |         |
| RC 5 | X   | 17,447,220 | G       | A       | 11  | IG   |           |           |        |           |        |         |
| RC 6 | I   | 8,623,736  | A       | G       | 28  | EX   | fer-1     | AGA       | Arg    | GGA       | Gly    | Non     |
| RC 6 | II  | 6,669,203  | C       | T       | 6   | EX   | T19D12.1  | AAC       | Asn    | AAT       | Asn    | Syn     |
| RC 6 | III | 12,004,543 | A       | T       | 6   | IG   |           |           |        |           |        |         |
| RC 6 | III | 12,004,552 | G       | A       | 6   | IG   |           |           |        |           |        |         |
| RC 6 | IV  | 6,794,092  | C       | T       | 32  | EX   | C17H12.3  | CTC       | Leu    | CTT       | Leu    | Syn     |

|       |     |            |   |   |    |    |            |     |     |     |     |     |
|-------|-----|------------|---|---|----|----|------------|-----|-----|-----|-----|-----|
| RC 6  | IV  | 8,580,642  | T | C | 5  | IG |            |     |     |     |     |     |
| RC 6  | X   | 6,687,376  | A | T | 21 | IG |            |     |     |     |     |     |
| RC 6  | X   | 7,206,440  | C | T | 28 | IG |            |     |     |     |     |     |
| RC 6  | X   | 13,634,317 | A | T | 31 | IG |            |     |     |     |     |     |
| RC 7  | III | 2,500,192  | T | G | 6  | IG |            |     |     |     |     |     |
| RC 7  | III | 4,947,709  | A | G | 32 | IG |            |     |     |     |     |     |
| RC 7  | V   | 19,683,735 | G | T | 5  | IN | mrp-7      |     |     |     |     |     |
| RC 7  | X   | 14,763,281 | G | T | 31 | EX | Y16B4A.2   | GGG | Gly | GGT | Gly | Syn |
| RC 8  | III | 2,282,489  | G | T | 6  | IN | Y54F10BM.3 |     |     |     |     |     |
| RC 8  | X   | 17,441,843 | G | A | 5  | IG |            |     |     |     |     |     |
| RC 9  | II  | 4,308,972  | A | T | 10 | IG |            |     |     |     |     |     |
| RC 9  | V   | 6,086,004  | C | A | 5  | IG |            |     |     |     |     |     |
| RC 10 | IV  | 12,731,956 | G | A | 5  | IG |            |     |     |     |     |     |
| RC 10 | V   | 10,340,073 | C | T | 28 | IN | K07C5.2    |     |     |     |     |     |
| RC 10 | X   | 4,425,834  | G | A | 22 | IG |            |     |     |     |     |     |
| RC 11 | IV  | 7,642,263  | T | C | 22 | IN | nlp-20     |     |     |     |     |     |
| RC 11 | V   | 5,358,409  | T | G | 22 | IG |            |     |     |     |     |     |
| RC 11 | X   | 2,347,297  | C | A | 17 | IN | T01B6.1    |     |     |     |     |     |
| RC 11 | X   | 2,884,067  | C | T | 16 | IG |            |     |     |     |     |     |
| RC 12 | X   | 11,976,631 | C | G | 6  | IG |            |     |     |     |     |     |
| RC 12 | X   | 14,908,742 | G | C | 5  | IG |            |     |     |     |     |     |
| RC 13 | I   | 34,362     | C | G | 22 | IG |            |     |     |     |     |     |
| RC 13 | I   | 9,403,794  | C | G | 24 | IN | F16A11.1   |     |     |     |     |     |
| RC 13 | I   | 12,181,325 | C | A | 23 | EX | abdh-11.2  | TTC | Phe | TTA | Phe | Syn |
| RC 13 | III | 1,849,254  | A | T | 5  | IN | pqn-82     |     |     |     |     |     |
| RC 13 | III | 4,634,881  | C | T | 24 | IN | F10F2.2    |     |     |     |     |     |
| RC 13 | IV  | 5,871,330  | C | T | 25 | PS | srv-18     |     |     |     |     |     |
| RC 13 | IV  | 7,899,075  | G | A | 13 | IN | atic-1     |     |     |     |     |     |
| RC 13 | IV  | 11,272,487 | C | T | 22 | IG |            |     |     |     |     |     |
| RC 13 | V   | 11,114,001 | G | A | 22 | IN | math-33    |     |     |     |     |     |
| RC 13 | V   | 14,297,743 | G | A | 20 | PS | F14D7.4    |     |     |     |     |     |
| RC 13 | X   | 3,821,608  | G | T | 17 | IN | flkh-9     |     |     |     |     |     |
| RC 14 | IV  | 8,574,587  | A | T | 6  | IG |            |     |     |     |     |     |
| RC 15 | V   | 9,981,010  | G | A | 6  | IG |            |     |     |     |     |     |
| RC 16 | II  | 694,578    | T | G | 6  | IG |            |     |     |     |     |     |
| RC 16 | II  | 3,797,273  | T | A | 13 | EX | Y8A9A.2    | CTG | Leu | CAG | Gln | Non |
| RC 16 | II  | 4,260,898  | T | C | 5  | IG |            |     |     |     |     |     |
| RC 16 | III | 12,347,900 | T | C | 5  | IN | pph-4.1    |     |     |     |     |     |
| RC 16 | V   | 4,140,793  | G | A | 24 | EX | lgc-29     | ACG | Thr | ACA | Thr | Syn |
| RC 17 | III | 5,357,452  | C | T | 5  | IG |            |     |     |     |     |     |



|       |     |            |   |   |    |    |             |     |     |     |      |     |
|-------|-----|------------|---|---|----|----|-------------|-----|-----|-----|------|-----|
| RC 17 | V   | 12,864,657 | A | G | 11 | IN | T07F10.6    |     |     |     |      |     |
| RC 17 | V   | 12,864,661 | C | G | 11 | IN | T07F10.6    |     |     |     |      |     |
| RC 18 | I   | 6,644,090  | C | A | 18 | IG |             |     |     |     |      |     |
| RC 18 | III | 7,415,236  | G | A | 25 | IG |             |     |     |     |      |     |
| RC 18 | IV  | 3,208,939  | G | C | 25 | PS | puf-4       |     |     |     |      |     |
| RC 18 | IV  | 17,063,015 | A | C | 8  | IN | Y116A8C.467 |     |     |     |      |     |
| RC 18 | V   | 6,087,148  | A | T | 6  | IG |             |     |     |     |      |     |
| RC 18 | V   | 9,603,864  | C | T | 6  | IG |             |     |     |     |      |     |
| RC 18 | X   | 17,445,113 | G | A | 8  | IG |             |     |     |     |      |     |
| RC 19 | I   | 8,008,052  | C | G | 27 | EX | C54G4.2     | CCA | Pro | CGA | Arg  | Non |
| RC 19 | III | 1,441,904  | C | T | 21 | EX | Y82E9BR.2   | CGT | Arg | TGT | Cys  | Non |
| RC 19 | IV  | 7,128,174  | A | G | 6  | IN | str-50      |     |     |     |      |     |
| RC 19 | V   | 2,763,471  | A | G | 20 | IG |             |     |     |     |      |     |
| RC 19 | X   | 14,908,867 | G | C | 9  | IG |             |     |     |     |      |     |
| RC 20 | I   | 12,360,758 | A | T | 21 | IN | oac-43      |     |     |     |      |     |
| RC 20 | II  | 1,422,675  | T | C | 14 | IN | Y51H7C.10   |     |     |     |      |     |
| RC 20 | II  | 13,505,040 | C | T | 18 | EX | F54F11.1    | CAA | Gln | TAA | Stop | Non |
| RC 20 | III | 958,048    | T | A | 35 | IG |             |     |     |     |      |     |
| RC 20 | IV  | 9,047,795  | C | G | 5  | IG |             |     |     |     |      |     |
| RC 20 | IV  | 15,020,193 | G | A | 23 | IN | Y41E3.7     |     |     |     |      |     |
| RC 20 | V   | 14,756,564 | C | T | 24 | IG |             |     |     |     |      |     |
| RC 20 | X   | 10,549,806 | C | T | 21 | IN | syd-2       |     |     |     |      |     |
| RC 20 | X   | 12,276,980 | G | T | 7  | IG |             |     |     |     |      |     |
| RC 21 | II  | 696,862    | T | C | 5  | IG |             |     |     |     |      |     |
| RC 22 | I   | 10,116,399 | C | A | 23 | EX | Y106G6D.4   | GCC | Ala | GAC | Asp  | Non |
| RC 22 | I   | 10,948,653 | T | G | 8  | IG |             |     |     |     |      |     |
| RC 22 | III | 490,793    | C | T | 27 | IG |             |     |     |     |      |     |
| RC 22 | IV  | 16,615,359 | T | G | 17 | IG |             |     |     |     |      |     |
| RC 22 | V   | 10,379,220 | G | C | 29 | EX | AC3.12      | GTA | Val | CTA | Leu  | Non |
| RC 22 | X   | 11,787,528 | T | A | 9  | IG |             |     |     |     |      |     |
| RC 23 | IV  | 8,573,847  | G | A | 9  | IG |             |     |     |     |      |     |
| RC 23 | V   | 6,173,736  | G | T | 14 | EX | ttn-1       | GAA | Glu | TAA | Stp  | Non |
| RC 23 | V   | 17,173,442 | C | A | 27 | IG |             |     |     |     |      |     |
| RC 23 | X   | 13,697,074 | A | T | 27 | IG |             |     |     |     |      |     |
| RC 24 | I   | 10,225,483 | T | C | 9  | EX | ced-12      | TTA | Phe | TCA | Ser  | Non |
| RC 24 | II  | 7,026,963  | C | A | 18 | IN | C52E12.1    |     |     |     |      |     |
| RC 24 | II  | 7,188,583  | T | G | 9  | IG |             |     |     |     |      |     |
| RC 24 | II  | 7,188,585  | G | T | 9  | IG |             |     |     |     |      |     |
| RC 24 | IV  | 11,614,944 | C | G | 10 | IG |             |     |     |     |      |     |
| RC 24 | V   | 12,312,064 | A | G | 14 | IG |             |     |     |     |      |     |

|       |   |            |   |   |    |    |         |  |  |  |  |  |  |
|-------|---|------------|---|---|----|----|---------|--|--|--|--|--|--|
| RC 24 | V | 20,588,961 | A | G | 19 | IN | F26F2.7 |  |  |  |  |  |  |
|-------|---|------------|---|---|----|----|---------|--|--|--|--|--|--|

**Table S7: Summary of *gas-1* RC line SNP-containing genes predicted to interact within two degrees of *gas-1*.** Table is organized by “RC line SNP” = RC line genes containing SNPs predicted to interact with genes in *gas-1* network; i.e., “*gas-1* Interaction”. Interaction values were obtained from Gene Orienteer. Asterisks denote interactions below the threshold minimum of 4.6. Note that two different mutation sites were observed within mitochondrial gene, *nduo-1*: 1977 bp and 2154 bp and are counted as two distinct mutations for a total of 13 mutations in 12 genes. Also note that each SNP-containing gene can interact with multiple genes within the *gas-1* network.

| RC Line SNP | <i>gas-1</i> Interaction | Interaction Value | RC Line |
|-------------|--------------------------|-------------------|---------|
| C55F2.1     | T22D1.3                  | 9.2               | RC 13   |
| C55F2.1     | Y57G11C.3                | 13.91             | RC 13   |
| C55F2.1     | R04B5.6                  | 14.72             | RC 13   |
| ced-12      | hda-1                    | 5.52              | RC 24   |
| F10F2.2     | C31C9.2                  | 5.68              | RC 13   |
| F10F2.2     | T22D1.3                  | 21.36             | RC 13   |
| F26F2.7     | sod-3                    | 4.76              | RC 24   |
| F26F2.7     | sod-2                    | 4.76              | RC 24   |
| F26F2.7     | ero-1                    | 14.41             | RC 24   |
| math-33     | hda-1                    | 6.33              | RC 13   |
| math-33     | prdx-2                   | 6.75              | RC13    |
| math-33     | idh-1                    | 13.18             | RC 13   |
| math-33     | T22D1.3                  | 15.55             | RC 13   |
| nduo-1      | gas-1                    | 7.58              | RC 22   |
| nduo-1      | gas-1                    | 7.58              | RC 3    |
| nduo-1      | gas-1                    | 7.58              | RC 5    |
| pph-4.1     | hda-1                    | 15.44             | RC 16   |
| slt-1       | sod-3                    | 5.32              | RC 5    |
| slt-1       | unc-9                    | 5.34              | RC 5    |
| slt-1       | sdha-2                   | 5.53              | RC 5    |
| slt-1       | sdha-1                   | 5.69              | RC 5    |
| slt-1       | sod-1                    | 6.04              | RC 5    |
| slt-1       | sod-5                    | 6.04              | RC 5    |
| slt-1       | hda-1                    | 10.97             | RC 5    |
| syd-2       | unc-9                    | 5.02              | RC 20   |
| tir-1       | emb-8                    | 5.29              | RC 5    |
| tir-1       | duox-2                   | 5.39              | RC 5    |
| tir-1       | vps-34                   | 6.01              | RC 5    |
| tir-1       | sod-1                    | 6.47              | RC 5    |
| tir-1       | sod-5                    | 6.47              | RC 5    |
| tir-1       | lpd-5                    | 7.76              | RC 5    |
| tir-1       | hda-1                    | 8.89              | RC 5    |
| tir-1       | bli-3                    | 21.92             | RC 5    |

|           |           |       |       |
|-----------|-----------|-------|-------|
| Y41E3.7   | T05H4.4   | 5.35  | RC 20 |
| Y41E3.7   | T05H4.5   | 5.35  | RC 20 |
| Y41E3.7   | F08F8.2   | 5.35  | RC 20 |
| Y92H12A.5 | gpd-2     | 12.12 | RC3   |
| *F16A11.1 | cts-1     | *0.79 | RC 13 |
| *F16A11.1 | rnr-1     | *0.79 | RC 13 |
| *F54F11.1 | F08F8.2   | *1.02 | RC 20 |
| *F54F11.1 | Y56A3A.19 | *1.02 | RC 20 |
| *fer-1    | sod-2     | *4.28 | RC 6  |
| *fer-1    | sod-3     | *4.17 | RC 6  |
| *fkh-9    | unc-1     | *1.61 | RC 13 |
| *K07C5.2  | acd-12    | *0.86 | RC 10 |
| *K07C5.2  | cts-1     | *0.86 | RC 10 |
| *K07C5.2  | DC2.5     | *0.86 | RC 10 |
| *K07C5.2  | ivd-1     | *0.86 | RC 10 |
| *K07C5.2  | let-721   | *0.86 | RC 10 |
| *K07C5.2  | sdha-1    | *0.86 | RC 10 |
| *K07C5.2  | shda-2    | *0.86 | RC 10 |
| *K07C5.2  | T27E9.2   | *0.86 | RC 10 |
| *K07C5.2  | trxr-1    | *0.86 | RC 10 |
| *K07C5.2  | Y57G11C.3 | *0.86 | RC 10 |
| *nduo-6   | gas-1     | *2.05 | RC 13 |
| *nduo-6   | gas-1     | *2.05 | RC 18 |
| *nduo-6   | gas-1     | *2.05 | RC 24 |
| *ppfr-1   | hda-1     | *2.05 | RC 6  |
| *puf-4    | hda-1     | *2.04 | RC 18 |
| *puf-4    | sod-1     | *2.04 | RC 18 |
| *puf-4    | sod-2     | *2.04 | RC 18 |
| *puf-4    | sod-3     | *2.04 | RC 18 |
| *R05D7.4  | fat-5     | *4.37 | RC 13 |
| *R05D7.4  | fat-6     | *4.37 | RC 13 |
| *R05D7.4  | fat-7     | *4.37 | RC 13 |
| *R05D7.4  | Y56A3A.19 | *3.35 | RC 13 |
| *set-29   | alh-1     | *3.13 | RC 3  |
| *set-29   | alh-2     | *3.13 | RC 3  |
| *set-29   | C31C9.2   | *3.13 | RC 3  |
| *set-29   | emb-8     | *3.47 | RC 3  |
| *set-29   | gspd-1    | *3.86 | RC 3  |
| *T01B6.1  | fat-6     | *1.32 | RC 11 |
| *T01B6.1  | fat-7     | *1.32 | RC 11 |
| *T01B6.1  | sod-1     | *0.97 | RC 11 |
